# Supplementary material
Source: PubMed Central journal article supplement (PMC4832842)
Supplement: ANIE-54-14044-s001.pdf [file ANIE-54-14044-s001.pdf]

## Supporting Information

### **C–H Oxidation of Ingenanes Enables Potent and Selective Protein Kinase C Isoform Activation**

*Yehua Jin, Chien-Hung Yeh, Christian A. Kuttruff, Lars Jørgensen, Georg Dünstl, Jakob Felding, Swaminathan R. Natarajan, and Phil S. Baran\**

anie\_201507977\_sm\_miscellaneous\_information.pdf

## SUPPORTING INFORMATION

### Part 1: Experimental Procedures and Characterization Data

#### Table of Contents

|                                                        |      |         |
|--------------------------------------------------------|------|---------|
| General Experimental.....                              | page | SI-3    |
| Scheme 1.....                                          | page | SI-4    |
| Scheme 2.....                                          | page | SI-5    |
| Scheme 3.....                                          | page | SI-6    |
| Scheme 4.....                                          | page | SI-7    |
| Scheme 5.....                                          | page | SI-8    |
| Experimental Procedures and Characterization Data..... | page | SI-9~57 |
| Compound <b>SI-1</b> .....                             | page | SI-9    |
| Compound <b>17</b> .....                               | page | SI-10   |
| Compound <b>25</b> .....                               | page | SI-11   |
| Compound <b>SI-3</b> .....                             | page | SI-12   |
| Compound <b>12</b> .....                               | page | SI-13   |
| Compound <b>10</b> .....                               | page | SI-14   |
| Compound <b>14</b> .....                               | page | SI-15   |
| Compound <b>13</b> .....                               | page | SI-16   |
| Compound <b>SI-5</b> .....                             | page | SI-17   |
| Compound <b>26</b> .....                               | page | SI-18   |
| Compound <b>11</b> .....                               | page | SI-19   |
| Compound <b>9</b> .....                                | page | SI-20   |
| Compound <b>22</b> and <b>SI-6</b> .....               | page | SI-22   |
| Compound <b>SI-7</b> .....                             | page | SI-23   |
| Compound <b>SI-8</b> .....                             | page | SI-24   |
| Compound <b>SI-9</b> .....                             | page | SI-26   |
| Compound <b>23</b> .....                               | page | SI-27   |
| Compound <b>SI-10</b> .....                            | page | SI-28   |
| Compound <b>7</b> .....                                | page | SI-29   |
| Compound <b>5</b> .....                                | page | SI-30   |
| Compound <b>SI-12</b> .....                            | page | SI-31   |
| Compound <b>16</b> .....                               | page | SI-32   |
| Compound <b>SI-13</b> .....                            | page | SI-33   |
| Compound <b>SI-14</b> .....                            | page | SI-34   |
| Compound <b>SI-15</b> .....                            | page | SI-35   |
| Compound <b>20</b> .....                               | page | SI-36   |
| Compound <b>21</b> .....                               | page | SI-37   |
| Compound <b>SI-16</b> .....                            | page | SI-38   |
| Compound <b>SI-17</b> .....                            | page | SI-39   |
| Compound <b>8</b> .....                                | page | SI-40   |
| Compound <b>6</b> .....                                | page | SI-41   |
| Compound <b>SI-19</b> .....                            | page | SI-42   |

|                                               |      |          |
|-----------------------------------------------|------|----------|
| Compound <b>SI-19a</b> and <b>SI-20</b> ..... | page | SI-43    |
| Compound <b>15'</b> .....                     | page | SI-45    |
| Compound <b>SI-21</b> .....                   | page | SI-45    |
| Compound <b>SI-22</b> .....                   | page | SI-46    |
| Compound <b>16'</b> and <b>SI-23</b> .....    | page | SI-48    |
| Compound <b>SI-22a</b> .....                  | page | SI-49    |
| Compound <b>17'</b> and <b>18'</b> .....      | page | SI-51    |
| Compound <b>SI-24</b> .....                   | page | SI-52    |
| Compound <b>4'</b> .....                      | page | SI-53    |
| Compound <b>1'</b> .....                      | page | SI-54    |
| Compound <b>SI-25</b> .....                   | page | SI-55    |
| Compound <b>SI-26</b> .....                   | page | SI-56    |
| Compound <b>3'</b> .....                      | page | SI-57    |
| Biological Experiments.....                   | page | SI-58~62 |
| X-Ray Crystallographic Data.....              | page | SI-63~72 |
| Compound <b>SI-4</b> .....                    | page | SI-63    |
| Compound <b>26</b> .....                      | page | SI-65    |
| Compound <b>23</b> .....                      | page | SI-67    |
| Compound <b>21</b> .....                      | page | SI-69    |
| Compound <b>4'</b> .....                      | page | SI-71    |
| References.....                               | page | SI-73    |

**General Procedures:** All reactions were carried out under an argon atmosphere with dry solvents using anhydrous conditions unless otherwise stated. Dry diethyl ether ( $\text{Et}_2\text{O}$ ), dichloromethane ( $\text{CH}_2\text{Cl}_2$ ), acetonitrile ( $\text{CH}_3\text{CN}$ ), toluene ( $\text{PhMe}$ ), tetrahydrofuran (THF), methanol ( $\text{MeOH}$ ), and triethylamine ( $\text{Et}_3\text{N}$ ) were obtained by passing these previously degassed solvents through activated alumina columns. Reagents were purchased at the highest commercial quality and used without further purification, unless otherwise stated. Yields refer to chromatographically and spectroscopically ( $^1\text{H}$  NMR) homogeneous materials, unless otherwise stated. Reactions were monitored by thin-layer chromatography (TLC) carried out on 0.25 mm E. Merck silica gel plates (60F-254) using UV light as visualizing agent and an acidic mixture of anisaldehyde, phosphomolybdic acid, or ceric ammonium molybdate, or basic aqueous potassium permanganate ( $\text{KMnO}_4$ ), and heat as developing agents. E. Merck silica gel (60, particle size 0.0430–0.663 mm) was used for flash column chromatography. Preparative thin layer chromatography (PTLC) separations were carried out on 0.25 or 0.50 mm E. Merck silica gel plates (60F-254). Concentration of organic solvents was performed on a rotary evaporator under reduced pressure followed by further evacuation using a two-stage mechanical pump. NMR spectra were recorded on Bruker DRX-600, DRX-500 and AMX-400 instruments and calibrated using residual undeuterated solvent as an internal reference ( $\text{CHCl}_3$  @  $\delta$  7.26 ppm  $^1\text{H}$  NMR,  $\delta$  77.16 ppm  $^{13}\text{C}$  NMR; Benzene @  $\delta$  7.16 ppm  $^1\text{H}$  NMR,  $\delta$  128.06 ppm  $^{13}\text{C}$  NMR). The following abbreviations (or combinations thereof) were used to explain  $^1\text{H}$  NMR multiplicities: s = singlet, d = doublet, t = triplet, q = quartet, p = quintet, m = multiplet, br = broad. High-resolution mass spectra (HRMS) were recorded on Agilent 6230 TOF LC/MS mass spectrometer by electrospray ionization time of flight reflectron experiments. IR spectra were recorded on a Perkin Elmer Spectrum BX FTIR spectrometer. Optical rotation were obtained on a Perkin-Elmer 341 polarimeter at 20 °C, measured at 589 nm. Melting points were recorded on a Fisher-Johns 12-144 melting point apparatus and are reported uncorrected.

## Scheme 1: Synthesis of 10

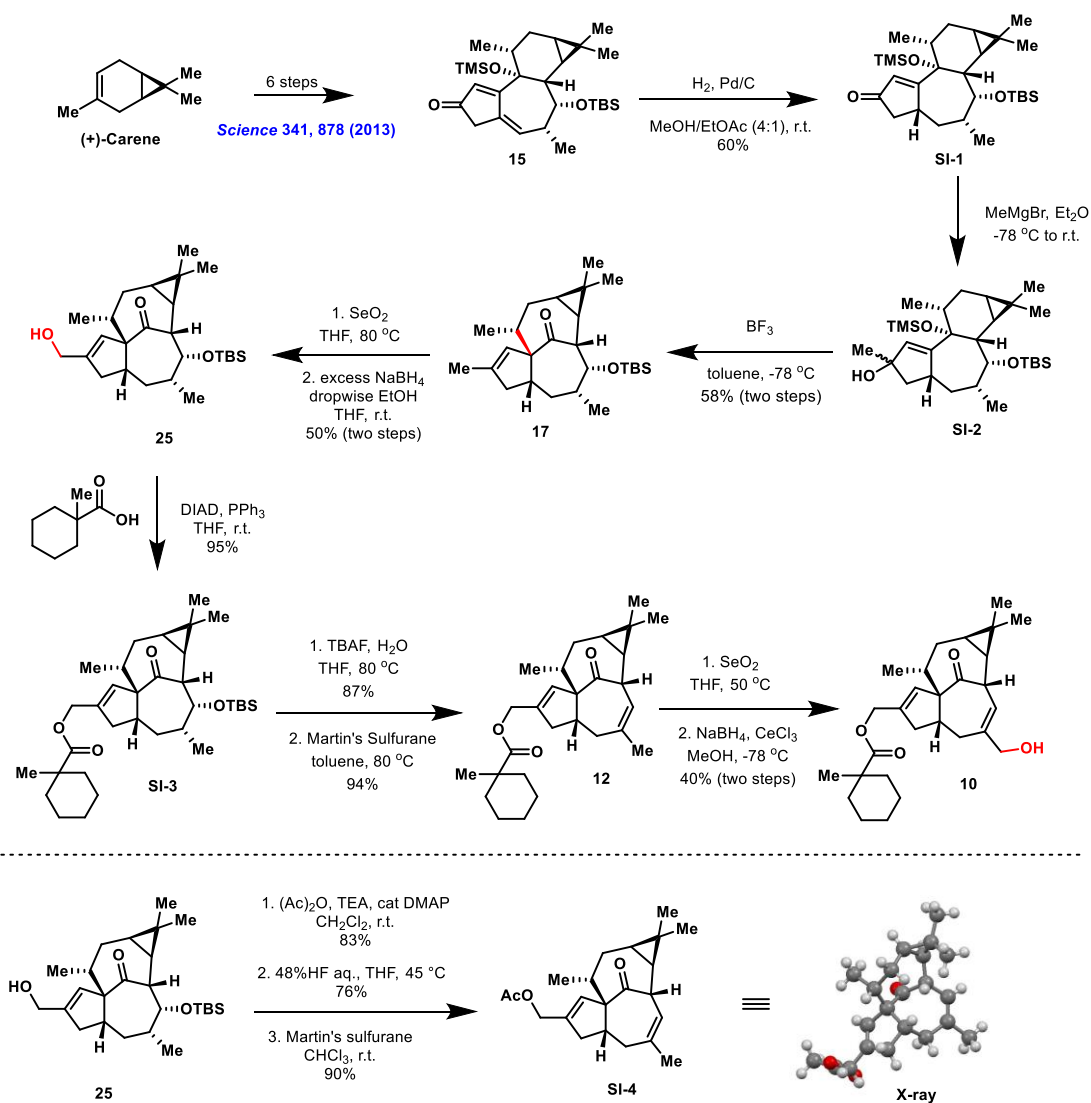

## Scheme 2: Synthesis of **9** and **13**

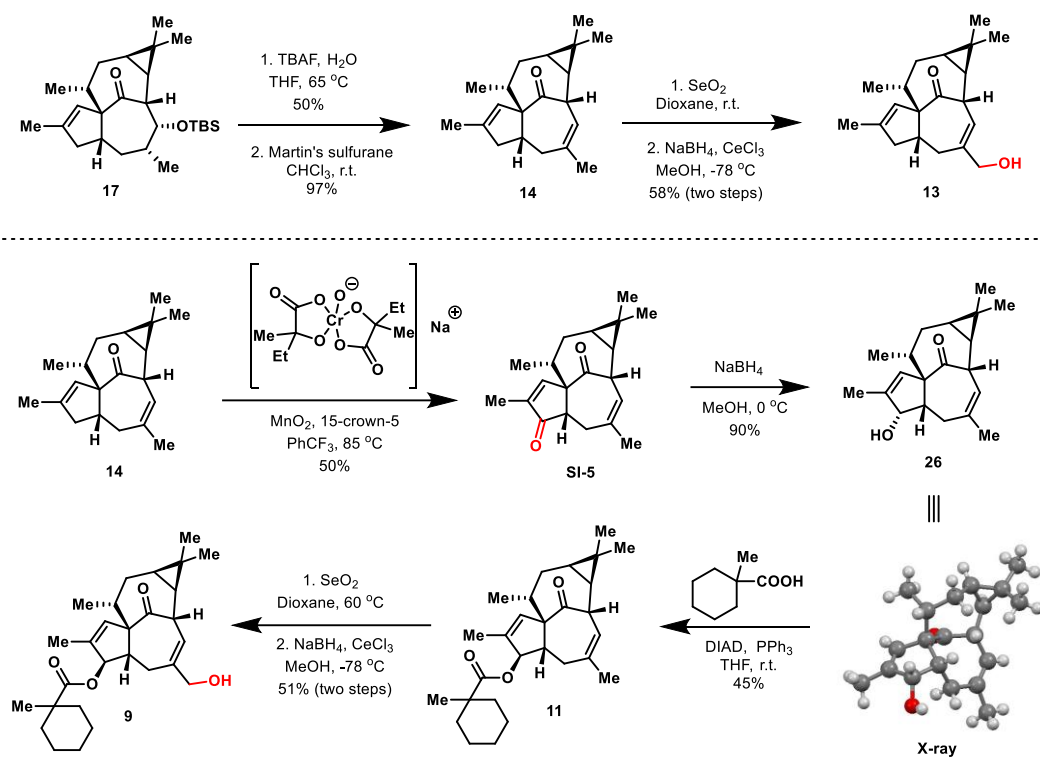

### Scheme 3: Synthesis of 5

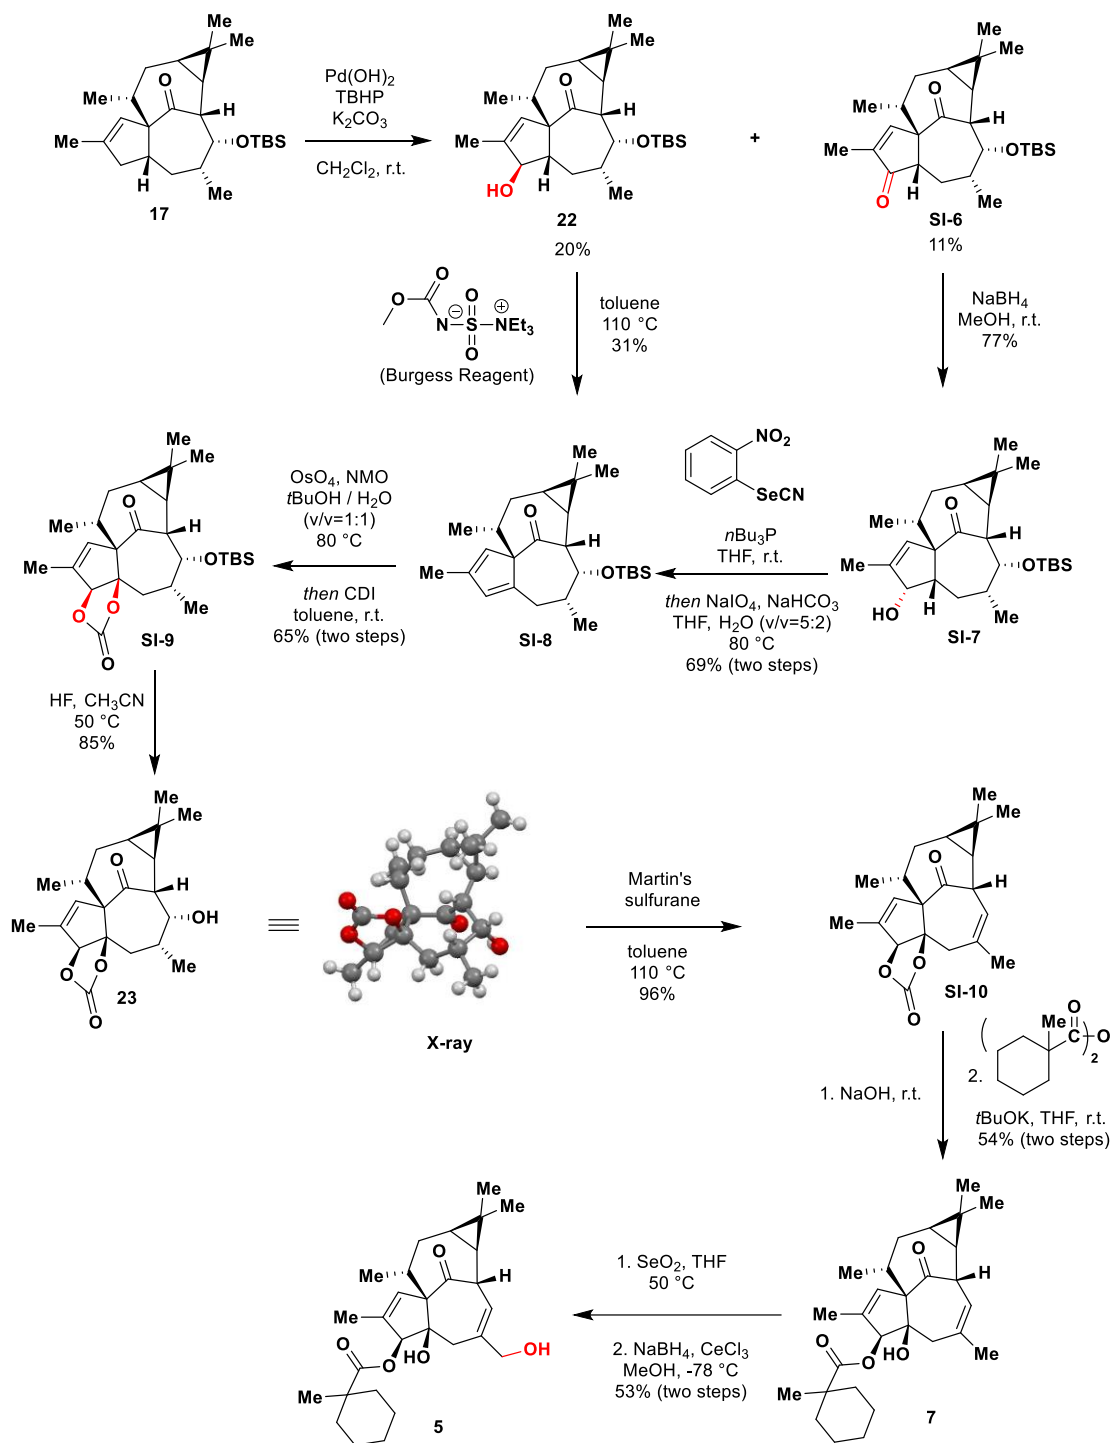

## Scheme 4: Synthesis of 6

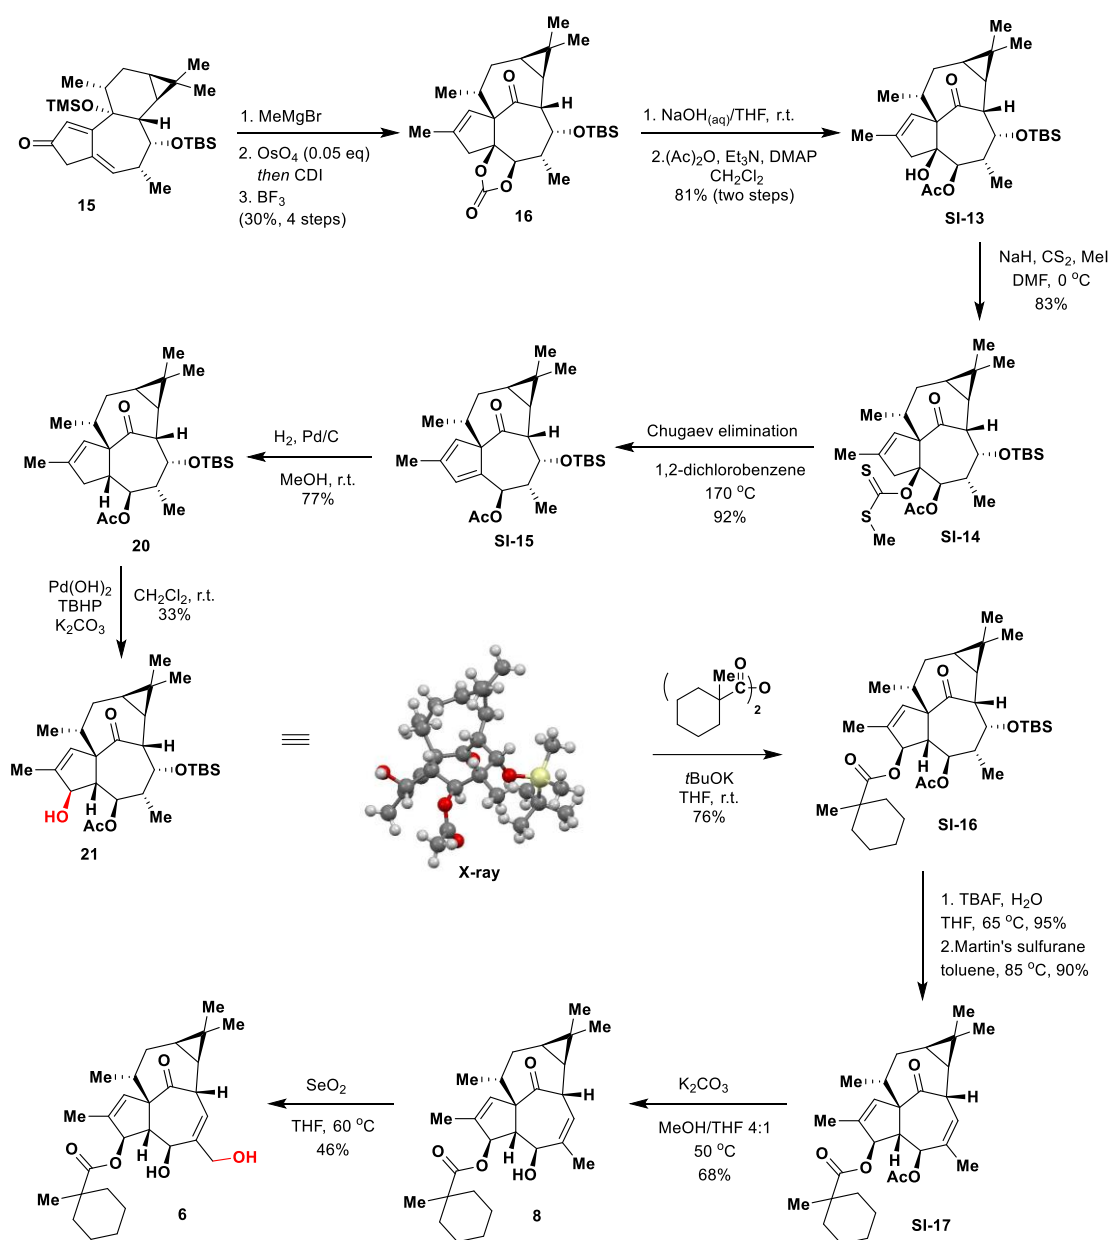

## Scheme 5: Synthesis of 3'

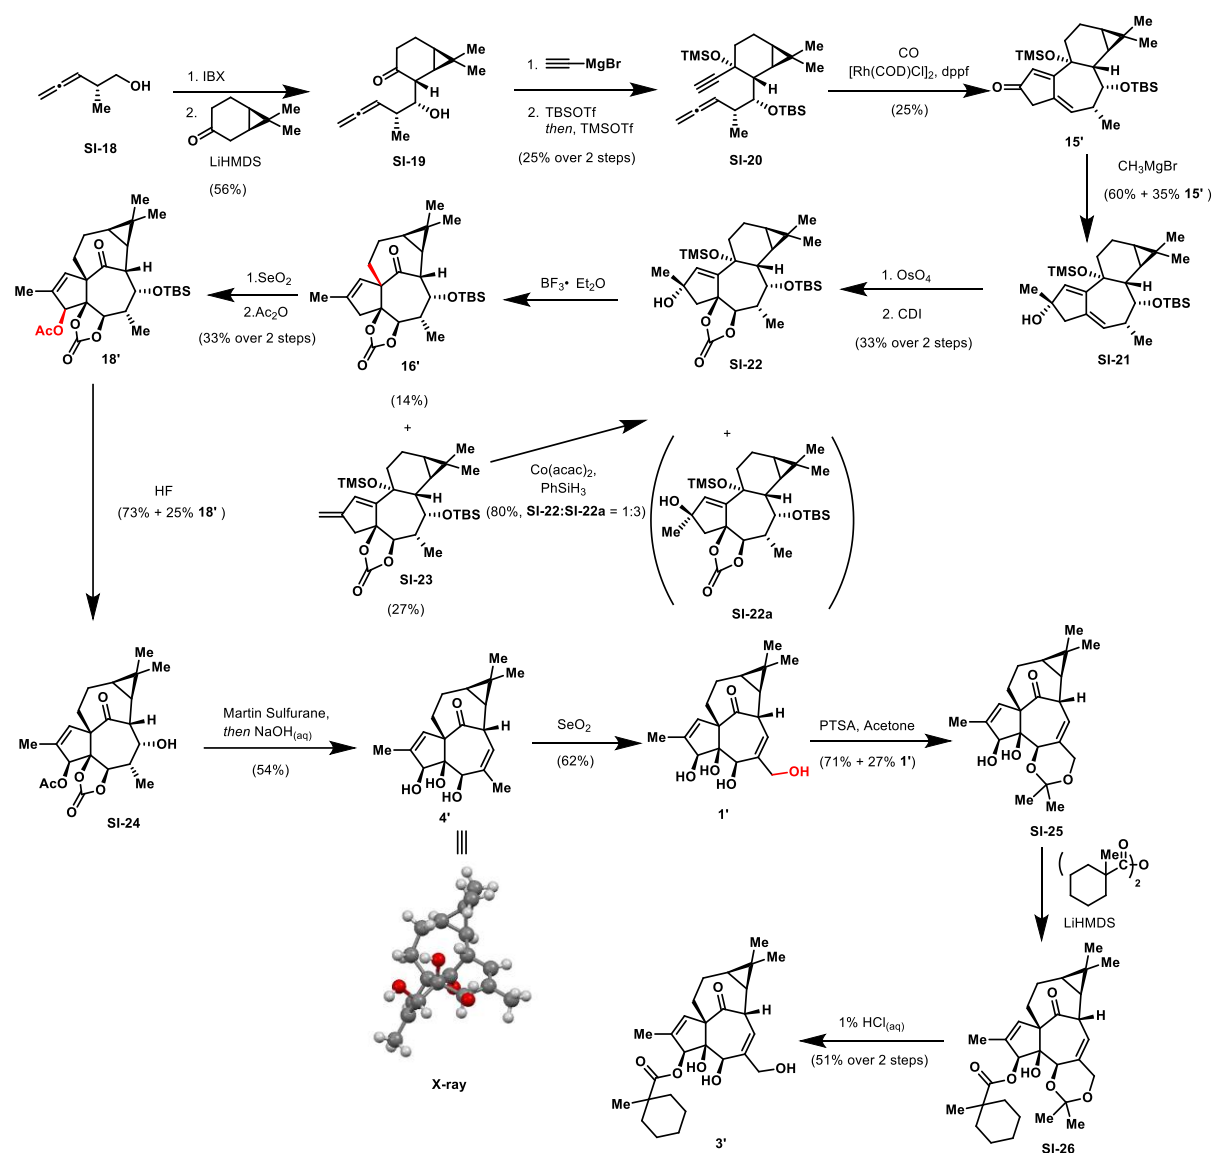

## Experimental Procedures

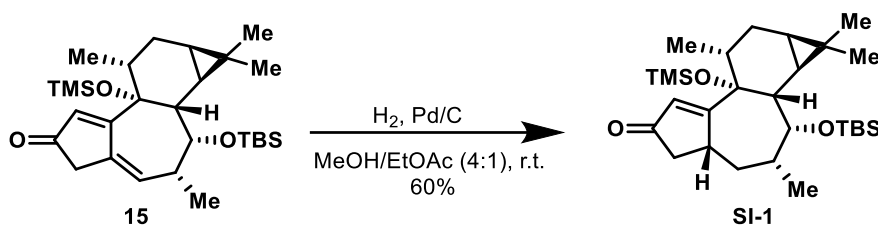

Synthesis of **SI-1**: To a solution of **15** (2.5 g, 5.12 mmol, 1.0 equiv) in MeOH (40 mL) and EtOAc (10 mL) was added 10% Pd/C (542 mg, 0.51 mmol, 0.1 equiv).  $H_{2(g)}$  was bubbled into this solution at room temperature. The reaction mixture was stirred at room temperature for 30 min. Then, the solvent was concentrated under reduced pressure. Purification of the crude product by flash column chromatography (silica gel, hexanes/EtOAc = 10:1  $\rightarrow$  5:1) afforded **SI-1** (1.5 g, 60%) as a colorless crystalline solid.

**Physical state**: colorless crystalline solid

$R_f$  = 0.5 (Hex/EtOAc = 5:1; anisaldehyde)

**HRMS** ( $m/z$ ): calcd for  $C_{28}H_{51}O_3Si_2$ ,  $[M+H]^+$ , 491.3377; found, 491.3376

$[\alpha]_D^{25}$  = +43.9° ( $c$  = 0.8, EtOAc)

**$^1H$  NMR** (400 MHz, Chloroform- $d$ )  $\delta$  6.03 (s, 1H), 3.77 (s, 1H), 2.75 – 2.62 (m, 2H), 2.12 (d,  $J$  = 17.0 Hz, 1H), 1.76 – 1.32 (m, 7H), 1.10 (s, 3H), 0.96 (s, 3H), 0.93 (d,  $J$  = 6.7 Hz, 3H), 0.87 (s, 9H), 0.84 – 0.72 (m, 2H), 0.62 (d,  $J$  = 6.9 Hz, 3H), 0.25 (s, 9H), 0.15 (s, 3H), 0.06 (s, 3H).

**$^{13}C$  NMR** (101 MHz, Chloroform- $d$ )  $\delta$  208.4, 192.1, 128.5, 83.0, 80.0, 52.0, 47.3, 44.0, 42.6, 41.9, 41.2, 28.9, 27.0, 26.9, 26.1, 21.9, 21.5, 19.2, 18.9, 17.6, 15.9, 5.1, -0.8, -4.1.

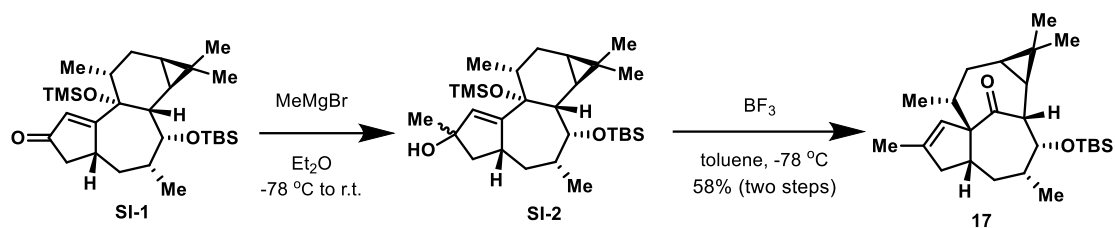

Synthesis of **17**: To a solution of **SI-1** (1.5 g, 3.06 mmol, 1.0 equiv) in Et<sub>2</sub>O (50 mL) was added methylmagnesium bromide (3 M in Et<sub>2</sub>O, 1.53 mL, 4.59 mmol, 1.5 equiv) over 5 min at  $-78\text{ }^{\circ}\text{C}$ . The reaction mixture was stirred at this temperature for 15 min before warming to  $0\text{ }^{\circ}\text{C}$ . After another 30 min of stirring, the reaction mixture was carefully quenched with water (100 mL). The mixture was extracted with Et<sub>2</sub>O ( $3 \times 100$  mL) and the combined organic layers were dried over MgSO<sub>4</sub>, filtered and concentrated under reduced pressure to afford crude **SI-2** (1.5 g) as a light yellow foam. To a solution of crude **SI-2** (1.5 g) in toluene (50 mL) was added BF<sub>3</sub>·Et<sub>2</sub>O (3.76 mL, 29.6 mmol, 9.7 equiv) over 5 min at  $-78\text{ }^{\circ}\text{C}$ . After 15 min, a 1:1 mixture of Et<sub>3</sub>N/MeOH (24.6 mL) was slowly added, then the solution was allowed warm to room temperature. The solvent was concentrated under reduced pressure. Purification of the crude product by flash column chromatography (silica gel, hexanes/EtOAc = 50:1  $\rightarrow$  30:1) afforded **17** (745.4 mg, 58%, two steps) as a white foam.

**Physical state**: white foam

$R_f$  = 0.22 (Hex/EtOAc = 50:1; anisaldehyde)

**HRMS** ( $m/z$ ): calcd for C<sub>26</sub>H<sub>45</sub>O<sub>2</sub>Si, [M+H]<sup>+</sup>, 417.3189; found, 417.3185

$[\alpha]_D^{25}$  = +21.2° ( $c$  = 0.65, EtOAc)

**<sup>1</sup>H NMR** (400 MHz, Chloroform-*d*)  $\delta$  5.61 (s, 1H), 3.83 (d,  $J$  = 3.8 Hz, 1H), 2.72 (dd,  $J$  = 16.2, 7.3 Hz, 1H), 2.51 (d,  $J$  = 12.2 Hz, 1H), 2.21 (dd,  $J$  = 10.6, 7.4 Hz, 1H), 1.90 – 1.74 (m, 3H), 1.70 (d,  $J$  = 1.4 Hz, 3H), 1.72 – 1.64 (m, 3H), 1.11 (d,  $J$  = 15.0 Hz, 1H), 1.08 (s, 3H), 1.04 (s, 3H), 0.94 (s, 9H), 0.90 (d,  $J$  = 7.0 Hz, 3H), 0.89 – 0.83 (m, 1H), 0.86 (d,  $J$  = 6.6 Hz, 3H), 0.67 (td,  $J$  = 8.8, 5.9 Hz, 1H), 0.15 (s, 3H), 0.03 (s, 3H).

**<sup>13</sup>C NMR** (151 MHz, Chloroform-*d*)  $\delta$  208.0, 139.2, 125.0, 76.4, 73.6, 52.1, 45.6, 45.2, 45.1, 40.7, 38.7, 29.9, 28.8, 26.2, 24.4, 23.6, 23.3, 19.8, 18.5, 17.3, 16.6, 15.8, -3.7, -4.6.

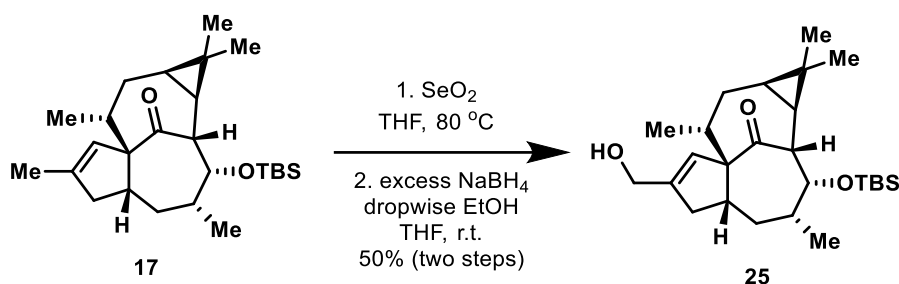

Synthesis of **25**: To a solution of **17** (384 mg, 0.92 mmol, 1.0 equiv) in THF (5 mL) was added SeO<sub>2</sub> (307 mg, 2.74 mmol, 3.0 equiv). The flask was sealed with a plastic cap and the suspension was stirred at 80 °C for 10 h. After cooling to room temperature, the reaction mixture was filtered through a plug of silica gel (hexanes/EtOAc = 1:1) to provide a clear yellow solution. A yellow oil was obtained after concentration *in vacuo*, and followed by dissolution in THF (5 mL). To this solution, excess NaBH<sub>4</sub> (350 mg, 9.21 mmol, 10.0 equiv) was added, then EtOH (0.54 mL, 9.21 mmol, 10.0 eq.) was slowly added at room temperature. When the reaction was completed (monitored by TLC), water (5 mL) was slowly added to quench the excess NaBH<sub>4</sub>. The reaction mixture was extracted with EtOAc (3 × 10 mL) and the combined organic layers were dried over MgSO<sub>4</sub>, filtered and concentrated under reduced pressure. Purification of the crude product by flash column chromatography (silica gel, hexanes/EtOAc = 4:1 → 3:1) afforded **25** (197.7 mg, 50%) as a pale yellow oil.

**Physical state:** pale yellow oil

**R<sub>f</sub>** = 0.2 (Hex/EtOAc = 4:1; anisaldehyde)

**HRMS** (*m/z*): calcd for C<sub>26</sub>H<sub>45</sub>O<sub>3</sub>Si, [M+H]<sup>+</sup>, 433.3138; found, 433.3132

[α]<sub>D</sub> = +26.5° (*c* = 0.43, EtOAc)

**<sup>1</sup>H NMR** (500 MHz, Chloroform-*d*) δ 6.14 – 5.68 (m, 1H), 4.15 (d, *J* = 5.3 Hz, 2H), 3.85 (d, *J* = 3.9 Hz, 1H), 2.76 (ddd, *J* = 15.9, 7.0, 3.9 Hz, 1H), 2.52 (d, *J* = 12.2 Hz, 1H), 2.30 (dd, *J* = 10.8, 7.4 Hz, 1H), 1.94 – 1.76 (m, 4H), 1.74 – 1.62 (m, 2H), 1.40 (t, *J* = 6.2 Hz, 1H), 1.14 (dd, *J* = 15.4, 2.0 Hz, 1H), 1.09 (s, 3H), 1.05 (s, 3H), 0.94 (s, 9H), 0.93 (d, *J* = 6.9 Hz, 3H), 0.90 – 0.85 (m, 1H), 0.87 (d, *J* = 6.7 Hz, 3H), 0.68 (td, *J* = 9.0, 6.1 Hz, 1H), 0.15 (s, 3H), 0.03 (s, 3H).

**<sup>13</sup>C NMR** (151 MHz, Chloroform-*d*) δ 207.5, 143.0, 125.9, 76.0, 73.5, 62.4, 52.3, 45.23, 45.21, 40.6, 40.5, 38.5, 30.0, 28.8, 26.2, 24.4, 23.7, 23.3, 19.7, 18.5, 16.5, 15.8, -3.7, -4.6.

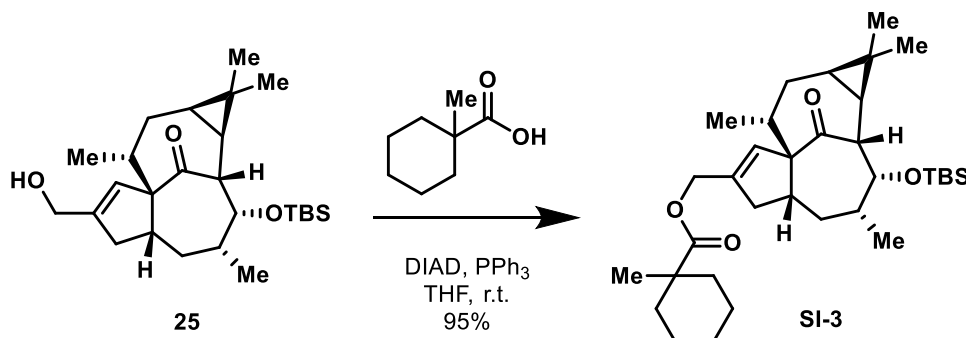

**Synthesis of SI-3:** To a solution of **25** (65.3 mg, 0.15 mmol, 1.0 equiv) in THF (3 mL) was added 1-methylcyclohexanecarboxylic acid (42.6 mg, 0.30 mmol, 2.0 equiv) and triphenylphosphine (119.0 mg, 0.45 mmol, 3.0 equiv) at room temperature. Then, DIAD (0.09 mL, 0.45 mmol, 3.0 equiv) was slowly added over 1 min. The reaction mixture was stirred at room temperature for another 5 min before water (5 mL) was added. The mixture was then extracted with Et<sub>2</sub>O (3 × 10 mL) and the combined organic layers were dried over MgSO<sub>4</sub>, filtered and concentrated under reduced pressure. Purification of the crude product by flash column chromatography (silica gel, hexanes/EtOAc = 30:1) afforded **SI-3** (79.8 mg, 95%) as a pale yellow oil.

**Physical state:** pale yellow oil

$R_f = 0.5$  (10:1 Hex/EtOAc; anisaldehyde)

**HRMS** ( $m/z$ ): calcd for  $C_{34}H_{56}NaO_4Si$ ,  $[M+Na]^+$ , 579.3846; found, 579.3852

$$[\alpha]_{\text{D}} = +23.2^{\circ} (c = 0.34, \text{CH}_2\text{Cl}_2)$$

**<sup>1</sup>H NMR** (600 MHz, Chloroform-*d*) δ 5.95 (s, 1H), 4.61 (s, 2H), 3.85 (d, *J* = 3.7 Hz, 1H), 2.75 (dd, *J* = 16.0, 6.9 Hz, 1H), 2.51 (d, *J* = 12.2 Hz, 1H), 2.37 – 2.18 (m, 1H), 2.03 (d, *J* = 13.2 Hz, 2H), 1.94 – 1.86 (m, 1H), 1.83 (d, *J* = 16.2 Hz, 1H), 1.83 – 1.78 (m, 2H), 1.75 – 1.62 (m, 2H), 1.54 – 1.46 (m, 2H), 1.35 (q, *J* = 10.7 Hz, 2H), 1.30 – 1.18 (m, 4H), 1.15 (s, 3H), 1.12 (d, *J* = 15.3 Hz, 1H), 1.09 (s, 3H), 1.04 (s, 3H), 0.94 (s,

9H), 0.91 (d,  $J = 7.0$  Hz, 3H), 0.88 (d,  $J = 9.0$  Hz, 1H), 0.87 (d,  $J = 6.9$  Hz, 3H), 0.71 – 0.64 (m, 1H), 0.15 (s, 3H), 0.03 (s, 3H).

$^{13}\text{C}$  NMR (151 MHz, Chloroform- $d$ )  $\delta$  207.2, 177.6, 138.2, 128.4, 76.1, 73.5, 62.8, 52.3, 45.2, 45.1, 43.5, 41.1, 40.5, 38.5, 35.7, 30.0, 28.8, 26.2, 25.8, 24.5, 23.7, 23.4, 23.2, 19.7, 18.5, 16.5, 15.8, -3.7, -4.6.

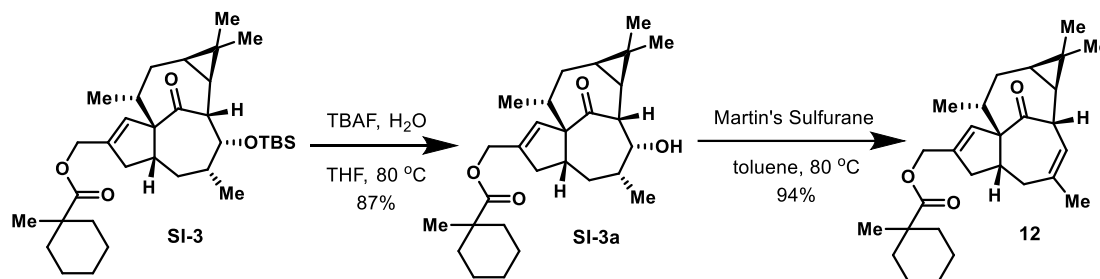

Synthesis of **12**: To a solution of **SI-3** (79.8 mg, 0.14 mmol, 1.0 equiv) in THF (3 mL) was added TBAF (1 M, 0.72 mL, 0.72 mmol, 5.0 equiv) and  $\text{H}_2\text{O}$  (13 mg, 0.72 mmol, 5 equiv) at room temperature. The flask was sealed with a plastic cap and the reaction mixture was heated to 80 °C. After 10 h, the reaction mixture was cooled to room temperature, then water (5 mL) was added. The mixture was extracted with  $\text{Et}_2\text{O}$  ( $3 \times 10$  mL) and the combined organic layers were dried over  $\text{MgSO}_4$ , filtered and concentrated under reduced pressure. Purification of the crude product by flash column chromatography (silica gel, hexanes/ $\text{EtOAc} = 10:1$ ) afforded **SI-3a** (54.9 mg, 87%).

To a solution of **SI-3a** (54.9 mg, 0.129 mmol, 1.0 equiv) in toluene (2 mL) was added Martin's sulfurane (110 mg, 0.163 mmol, 1.3 equiv) at room temperature. The solution was stirred at 80 °C for 10 min. Toluene was then removed under reduced pressure. Purification of the crude product by flash column chromatography (silica gel, hexanes/ $\text{EtOAc} = 20:1$ ) afforded **12** (49.3 mg, 94%) as a colorless oil.

**Physical state:** colorless oil

$R_f = 0.2$  (Hex/ $\text{EtOAc} = 20:1$ ; anisaldehyde)

**HRMS** ( $m/z$ ): calcd for  $\text{C}_{28}\text{H}_{40}\text{NaO}_3$ ,  $[\text{M}+\text{Na}]^+$ , 447.2875; found, 447.2875

$[\alpha]_D^{25} = +5.6^\circ$  ( $c = 0.18$ ,  $\text{CH}_2\text{Cl}_2$ )

**<sup>1</sup>H NMR** (600 MHz, Chloroform-*d*)  $\delta$  5.93 (s, 1H), 5.63 (s, 1H), 4.63 (s, 2H), 3.62 (d,  $J$  = 12.0 Hz, 1H), 2.78 – 2.63 (m, 2H), 2.17 – 2.08 (m, 2H), 2.08 – 2.00 (m, 3H), 1.87 (dt,  $J$  = 15.7, 5.4 Hz, 1H), 1.80 – 1.70 (m, 2H), 1.58 (s, 3H), 1.52 – 1.47 (m, 2H), 1.41 – 1.32 (m, 2H), 1.30 – 1.18 (m, 4H), 1.17 (s, 3H), 1.10 (s, 3H), 1.05 (s, 3H), 0.96 (d,  $J$  = 7.0 Hz, 3H), 0.87 (dd,  $J$  = 12.1, 8.3 Hz, 1H), 0.71 (td,  $J$  = 8.7, 6.4 Hz, 1H).

**<sup>13</sup>C NMR** (151 MHz, Chloroform-*d*)  $\delta$  208.9, 177.6, 139.3, 137.8, 126.1, 122.0, 76.3, 62.8, 45.4, 43.5, 43.1, 43.0, 38.4, 38.2, 35.7, 30.7, 28.8, 25.8, 24.4, 23.7, 23.5, 23.4, 23.1, 16.8, 15.6.

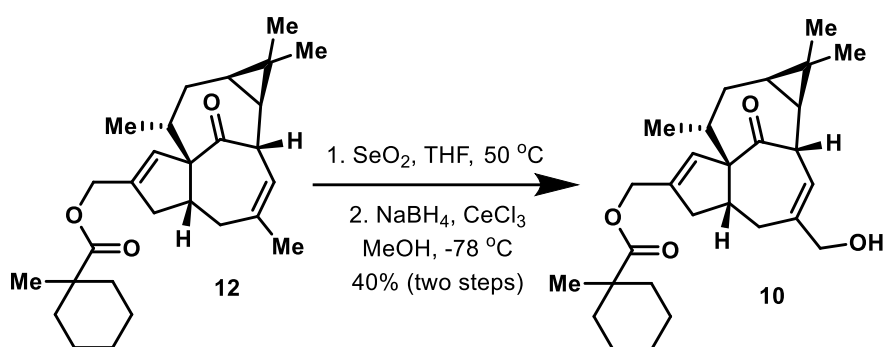

**Synthesis of **10**:** To a solution of **12** (5.5 mg, 0.013 mmol, 1.0 equiv) in THF (2 mL) was added SeO<sub>2</sub> (7.3 mg, 0.065 mmol, 5.0 equiv) at room temperature. The flask was sealed with a plastic cap and the suspension was stirred at 50 °C for 1 h. After cooling to room temperature, the reaction mixture was filtered through a plug of silica gel (hexanes/EtOAc = 1:1) to provide a clear yellow solution. A yellow oil was obtained after concentration *in vacuo*, and followed by dissolution in MeOH (2 mL). After cooling to –78 °C, CeCl<sub>3</sub>·7H<sub>2</sub>O (24 mg, in 0.5 mL MeOH, 0.065 mmol, 5.0 equiv) was added, then NaBH<sub>4</sub> (4.9 mg, 0.129 mmol, 10.0 equiv) was slowly added to the flask. After stirring for 10 min at –78 °C, H<sub>2</sub>O (2 mL) was carefully added to quench this reaction followed by dilution with Et<sub>2</sub>O (5 mL). The mixture was extracted with Et<sub>2</sub>O (5 × 2 mL) and the combined organic layers were dried over MgSO<sub>4</sub>, filtered and concentrated under reduced pressure. Purification of the crude product by flash column chromatography (silica gel, hexanes/EtOAc = 2:1) afforded **10** (2.3 mg, 40%) as a colorless oil.

**Physical state:** colorless oil

$R_f = 0.16$  (Hex/EtOAc = 3:1; anisaldehyde)

**HRMS** ( $m/z$ ): calcd for  $C_{28}H_{40}NaO_4$ ,  $[M+Na]^+$ , 463.2824; found, 463.2815

$[\alpha]_D^{25} = -4.2^\circ$  ( $c = 0.19$ ,  $CH_2Cl_2$ )

**$^1H$  NMR** (600 MHz, Chloroform- $d$ )  $\delta$  5.94 (s, 1H), 5.91 (s, 1H), 4.63 (s, 2H), 3.88 (q,  $J = 13.0$  Hz, 2H), 3.67 (d,  $J = 11.8$  Hz, 1H), 2.77 – 2.64 (m, 2H), 2.25 (d,  $J = 16.9$  Hz, 1H), 2.21 – 2.12 (m, 1H), 2.12 – 1.98 (m, 3H), 1.89 (dt,  $J = 15.8, 5.6$  Hz, 1H), 1.82 (d,  $J = 15.0$  Hz, 1H), 1.75 (ddd,  $J = 15.6, 8.9, 2.4$  Hz, 1H), 1.60 – 1.54 (m, 2H), 1.41 – 1.31 (m, 2H), 1.31 – 1.19 (m, 4H), 1.17 (s, 3H), 1.10 (s, 3H), 1.06 (s, 3H), 0.97 (d,  $J = 7.0$  Hz, 3H), 0.91 (dd,  $J = 12.0, 8.4$  Hz, 1H), 0.78 – 0.69 (m, 1H).

**$^{13}C$  NMR** (151 MHz, Chloroform- $d$ )  $\delta$  208.6, 177.5, 141.1, 139.6, 125.7, 123.7, 76.3, 67.3, 62.7, 45.4, 43.5, 42.8, 38.5, 38.3, 38.2, 35.7, 30.8, 28.7, 25.8, 23.8, 23.6, 23.4, 23.0, 17.0, 15.6.

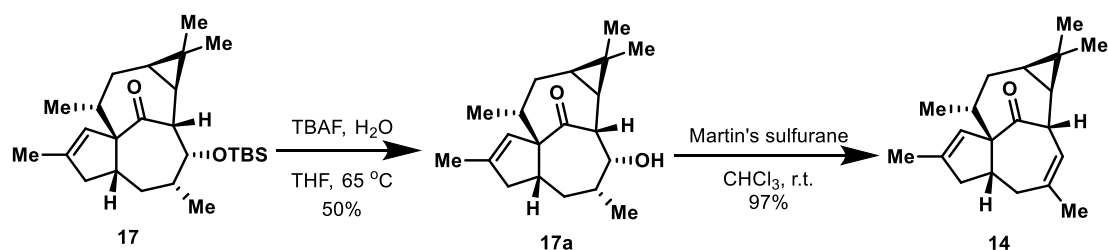

**Synthesis of **14**:** To a solution of **17** (496 mg, 1.19 mmol, 1.0 equiv) in THF (5 mL) was added TBAF (1 M, 5.95 mL, 5.95 mmol, 5.0 equiv) and  $H_2O$  (53 mg, 2.94 mmol, 2.5 equiv) at room temperature. The flask was sealed with a plastic cap and the reaction mixture was heated to  $65^\circ C$ . After stirring for 2 days, the reaction mixture was cooled to room temperature then water (5 mL) was added. The mixture was extracted with  $Et_2O$  ( $3 \times 10$  mL) and the combined organic layers were dried over  $MgSO_4$ , filtered and concentrated under reduced pressure. Purification of the crude product by flash column chromatography (silica gel, hexanes/ $EtOAc = 10:1$ ) afforded **17a** (178.3 mg, 50%).

To a solution of **17a** (178.3 mg, 0.59 mmol, 1.0 equiv) in  $CHCl_3$  (3 mL) was added Martin's sulfurane (540 mg, 0.80 mmol, 1.4 equiv) at room temperature. The reaction mixture was stirred at room temperature for 30 min. Then,  $CHCl_3$  was removed under

reduced pressure. Purification of the crude product by flash column chromatography (silica gel, hexanes/EtOAc = 30:1 → 20:1) afforded **14** (162.6 mg, 97%) as a pale yellow oil.

**Physical state:** pale yellow oil

$R_f$  = 0.5 (Hex/EtOAc = 10:1; anisaldehyde)

**HRMS** ( $m/z$ ): calcd for  $C_{20}H_{29}O$ ,  $[M+H]^+$ , 285.2218; found, 285.2211

$[\alpha]_D^{25}$  = +0.7° ( $c$  = 0.42, EtOAc)

**$^1H$  NMR** (400 MHz, Chloroform- $d$ )  $\delta$  5.62 (s, 1H), 5.58 (s, 1H), 3.63 (d,  $J$  = 10.2 Hz, 1H), 2.69 – 2.60 (m, 2H), 2.11 – 2.08 (m, 2H), 2.05 – 1.96 (m, 1H), 1.84 (dt,  $J$  = 15.7, 5.6 Hz, 1H), 1.76 – 1.69 (m, 1H), 1.74 (s, 3H), 1.61 (d,  $J$  = 14.9 Hz, 1H), 1.58 (s, 3H), 1.09 (s, 3H), 1.05 (s, 3H), 0.95 (d,  $J$  = 7.1 Hz, 3H), 0.86 (dd,  $J$  = 12.1, 8.4 Hz, 1H), 0.70 (td,  $J$  = 8.6, 6.2 Hz, 1H).

**$^{13}C$  NMR** (151 MHz, Chloroform- $d$ )  $\delta$  209.8, 140.4, 137.9, 122.6, 122.0, 76.6, 45.3, 43.4, 42.4, 38.4, 30.7, 28.8, 24.5, 23.6, 23.5, 23.1, 17.5, 16.9, 15.6.

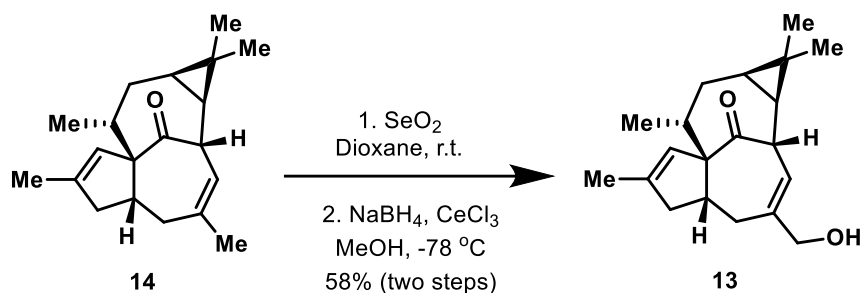

**Synthesis of **13**:** To a solution of **14** (46 mg, 0.16 mmol, 1.0 equiv) in dioxane (2 mL) was added  $SeO_2$  (36 mg, 0.32 mmol, 2.0 equiv) at room temperature. The flask was sealed with a plastic cap and the suspension was stirred at room temperature for 1 h. The reaction mixture was filtered through a plug of silica gel (hexanes/EtOAc = 1:1) to provide a clear yellow solution. A yellow oil was obtained after concentration *in vacuo*, and followed by dissolution in MeOH (2 mL). After cooling to  $-78\text{ }^\circ C$ ,  $CeCl_3 \cdot 7H_2O$  (301.5 mg, 0.81 mmol, in 2 mL MeOH, 5.0 equiv) was added, then  $NaBH_4$  (31 mg,

0.81 mmol, 5.0 eq.) was slowly added to the flask. After stirring for 10 min at  $-78\text{ }^{\circ}\text{C}$ ,  $\text{H}_2\text{O}$  (5 mL) was carefully added to quench this reaction followed by dilution with  $\text{Et}_2\text{O}$  (10 mL). The mixture was extracted with  $\text{Et}_2\text{O}$  ( $3 \times 10\text{ mL}$ ) and the combined organic layers were dried over  $\text{MgSO}_4$ , filtered and concentrated under reduced pressure. Purification of the crude product by flash column chromatography (silica gel, hexanes/ $\text{EtOAc}$  = 3:1) afforded **13** (28.3 mg, 58%) as a pale yellow oil.

**Physical state:** pale yellow oil

$R_f$  = 0.4 (Hex/ $\text{EtOAc}$  = 2:1; anisaldehyde)

**HRMS** ( $m/z$ ): calcd for  $\text{C}_{20}\text{H}_{29}\text{O}_2$ ,  $[\text{M}+\text{H}]^+$ , 301.2168; found, 301.2166

$[\alpha]_D^{25} = -5.0^{\circ}$  ( $c$  = 0.18,  $\text{CH}_2\text{Cl}_2$ )

**$^1\text{H}$  NMR** (600 MHz,  $\text{Chloroform-}d$ )  $\delta$  5.92 (s, 1H), 5.57 (s, 1H), 3.96 – 3.83 (m, 2H), 3.67 (d,  $J$  = 12.0 Hz, 1H), 2.73 – 2.57 (m, 2H), 2.29 – 2.12 (m, 2H), 2.07 – 2.02 (m, 1H), 1.87 (dt,  $J$  = 15.8, 5.7 Hz, 1H), 1.76 – 1.71 (m, 1H), 1.74 (s, 3H), 1.67 (d,  $J$  = 15.2 Hz, 1H), 1.09 (s, 3H), 1.06 (s, 3H), 0.96 (d,  $J$  = 7.1 Hz, 3H), 0.90 (dd,  $J$  = 12.0, 8.4 Hz, 1H), 0.73 (td,  $J$  = 8.6, 6.2 Hz, 1H).

**$^{13}\text{C}$  NMR** (151 MHz,  $\text{Chloroform-}d$ )  $\delta$  209.4, 141.3, 140.7, 123.8, 122.4, 76.7, 67.4, 45.2, 43.2, 42.4, 38.5, 38.4, 30.8, 28.8, 23.7, 23.6, 22.9, 17.5, 17.1, 15.6.

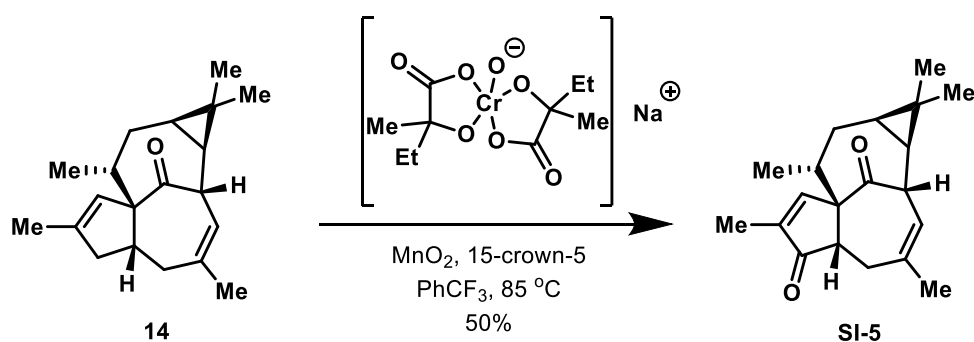

**Synthesis of SI-5:** To a flame-dried 25 mL flask equipped with a stir bar were added **14** (21.3 mg, 0.075 mmol, 1.0 equiv), Cr(V) reagent (124.1 mg, 0.384 mmol, 5.0 equiv) and manganese (IV) oxide (324.6 mg, 49.8 equiv). The flask was evacuated and filled

with argon, followed by addition of  $\alpha,\alpha,\alpha$ -trifluorotoluene (5 mL) and 15-crown-5 (74  $\mu$ L). The vial was sealed with a septum and heated at 85 °C for 24 h. The reaction mixture was filtered through a two-layered plug of silica and Celite® (hexanes/EtOAc = 1:1) to provide a clear yellow solution, which was concentrated *in vacuo* to a yellow oil. Purification of the crude product by flash column chromatography (silica gel, hexanes/EtOAc = 20:1  $\rightarrow$  10:1) afforded **SI-5** (11.1 mg, 50%) as a pale yellow oil.

**Physical state:** pale yellow oil

$R_f$  = 0.4 (Hex/EtOAc = 5:1; anisaldehyde)

**HRMS** ( $m/z$ ): calcd for  $C_{20}H_{27}O_2$ ,  $[M+H]^+$ , 299.2011; found, 299.2011

$[\alpha]_D^{25}$  = +74.6° ( $c$  = 0.26,  $CH_2Cl_2$ )

**$^1H$  NMR** (600 MHz, Chloroform- $d$ )  $\delta$  7.51 (s, 1H), 5.67 (s, 1H), 3.61 (d,  $J$  = 10.1 Hz, 1H), 2.71 (dd,  $J$  = 12.4, 4.0 Hz, 1H), 2.43 (dd,  $J$  = 18.3, 3.8 Hz, 1H), 1.98 (ddt,  $J$  = 9.4, 6.6, 2.6 Hz, 1H), 1.95 – 1.85 (m, 2H), 1.85 – 1.74 (m, 1H), 1.81 (d,  $J$  = 1.5 Hz, 3H), 1.61 (s, 3H), 1.11 (s, 3H), 1.07 (s, 3H), 0.99 (d,  $J$  = 6.9 Hz, 3H), 0.96 (dd,  $J$  = 11.9, 8.5 Hz, 1H), 0.78 – 0.73 (m, 1H).

**$^{13}C$  NMR** (151 MHz, Chloroform- $d$ )  $\delta$  207.8, 206.2, 155.4, 140.7, 136.0, 122.1, 70.5, 52.8, 45.6, 42.9, 39.5, 31.6, 28.8, 24.2, 23.8, 23.5, 23.3, 17.8, 15.5, 10.7.

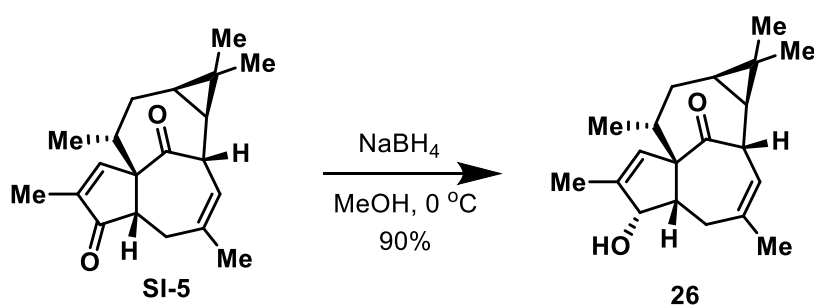

**Synthesis of 26:** To a solution of **SI-5** (11.1 mg, 0.037 mmol, 1.0 equiv) in MeOH (1 mL) at 0 °C was slowly added  $NaBH_4$  (7.1 mg, 0.187 mmol, 5.0 equiv). The reaction mixture was stirred at 0 °C for 5 min before quenching with  $H_2O$  (2 mL). The mixture was extracted with  $Et_2O$  ( $3 \times 5$  mL) and the combined organic layers were dried over

MgSO<sub>4</sub>, filtered and concentrated under reduced pressure. Purification of the crude product by flash column chromatography (silica gel, hexanes/EtOAc = 5:1) afforded **26** (10.1 mg, 90%) as a colorless crystalline solid.

**Physical state:** colorless crystalline solid

$R_f$  = 0.2 (Hex/EtOAc = 5:1; anisaldehyde)

**HRMS** ( $m/z$ ): calcd for C<sub>20</sub>H<sub>29</sub>O<sub>2</sub>, [M+H]<sup>+</sup>, 301.2168; found, 301.2168

$[\alpha]_D^{25}$  = -5.6° ( $c$  = 0.18, CH<sub>2</sub>Cl<sub>2</sub>)

**<sup>1</sup>H NMR** (600 MHz, Chloroform-*d*)  $\delta$  5.77 – 5.70 (m, 1H), 5.66 (dq,  $J$  = 4.8, 1.5 Hz, 1H), 4.72 – 4.65 (m, 1H), 3.67 (d,  $J$  = 11.8 Hz, 1H), 2.75 (ddd,  $J$  = 10.3, 6.2, 3.9 Hz, 1H), 2.53 (dd,  $J$  = 17.9, 3.7 Hz, 1H), 2.11 (td,  $J$  = 6.8, 3.1 Hz, 1H), 1.95 (dd,  $J$  = 17.8, 10.6 Hz, 2H), 1.85 (dt,  $J$  = 15.8, 6.3 Hz, 1H), 1.82 – 1.76 (m, 1H), 1.79 (t,  $J$  = 1.3 Hz, 3H), 1.66 (s, 3H), 1.12 (s, 3H), 1.04 (s, 3H), 0.94 (dd,  $J$  = 11.8, 8.5 Hz, 2H), 0.89 (d,  $J$  = 7.0 Hz, 3H), 0.68 (q,  $J$  = 7.4 Hz, 1H).

**<sup>13</sup>C NMR** (151 MHz, Chloroform-*d*)  $\delta$  210.1, 142.5, 137.9, 125.0, 122.2, 78.6, 73.1, 48.3, 45.0, 37.5, 33.7, 31.3, 28.8, 24.9, 23.9, 23.34, 23.26, 17.2, 15.6, 13.9.

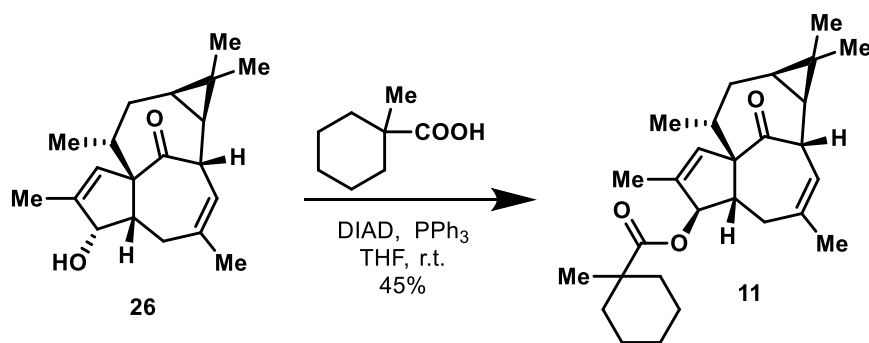

**Synthesis of 11:** To a solution of **26** (7.0 mg, 0.023 mmol, 1.0 equiv) in THF (1 mL) was added 1-methylcyclohexanecarboxylic acid (16.6 mg, 0.116 mmol, 5.0 equiv) and triphenylphosphine (30.6 mg, 0.116 mmol, 5.0 equiv) at room temperature. Then, DIAD (23  $\mu$ L, 0.116 mmol, 5.0 equiv) was slowly added over 1 min. The reaction mixture was stirred at room temperature for 5 min before water (5 mL) was added. The

mixture was extracted with Et<sub>2</sub>O (3 × 10 mL) and the combined organic layers were dried over MgSO<sub>4</sub>, filtered and concentrated under reduced pressure. Purification of the crude product by flash column chromatography (silica gel, hexanes/EtOAc = 50:1 → 30:1) afforded **11** (4.4 mg, 45%) as a colorless oil.

**Physical state:** colorless oil

$R_f$  = 0.2 (Hex/EtOAc = 20:1; anisaldehyde)

**HRMS** ( $m/z$ ): calcd for C<sub>28</sub>H<sub>40</sub>NaO<sub>3</sub>, [M+Na]<sup>+</sup>, 447.2875; found, 447.2884

[ $\alpha$ ]<sub>D</sub> = +16.4° ( $c$  = 0.44, CH<sub>2</sub>Cl<sub>2</sub>)

**<sup>1</sup>H NMR** (600 MHz, Chloroform-*d*)  $\delta$  6.04 (s, 1H), 5.62 (s, 1H), 4.82 (s, 1H), 3.51 (d,  $J$  = 11.7 Hz, 1H), 2.47 (s, 1H), 2.45 (dd,  $J$  = 15.9, 3.4 Hz, 1H), 2.18 – 2.08 (m, 1H), 2.01 (d,  $J$  = 12.3 Hz, 2H), 1.96 – 1.87 (m, 1H), 1.82 (dt,  $J$  = 15.7, 5.8 Hz, 1H), 1.77 (d,  $J$  = 1.3 Hz, 3H), 1.67 (ddd,  $J$  = 15.7, 9.1, 2.6 Hz, 1H), 1.59 (s, 4H), 1.58 – 1.51 (m, 2H), 1.38 – 1.19 (m, 6H), 1.14 (s, 3H), 1.07 (s, 3H), 1.04 (s, 3H), 1.01 (d,  $J$  = 7.1 Hz, 3H), 0.85 (dd,  $J$  = 12.1, 8.4 Hz, 1H), 0.69 (td,  $J$  = 8.8, 6.3 Hz, 1H).

**<sup>13</sup>C NMR** (151 MHz, Chloroform-*d*)  $\delta$  208.3, 178.1, 138.0, 136.9, 131.8, 122.2, 85.9, 75.4, 49.3, 45.4, 43.4, 41.4, 40.0, 35.7, 30.5, 28.8, 25.8, 24.3, 23.5, 23.44, 23.40, 22.9, 16.7, 15.6, 15.3.

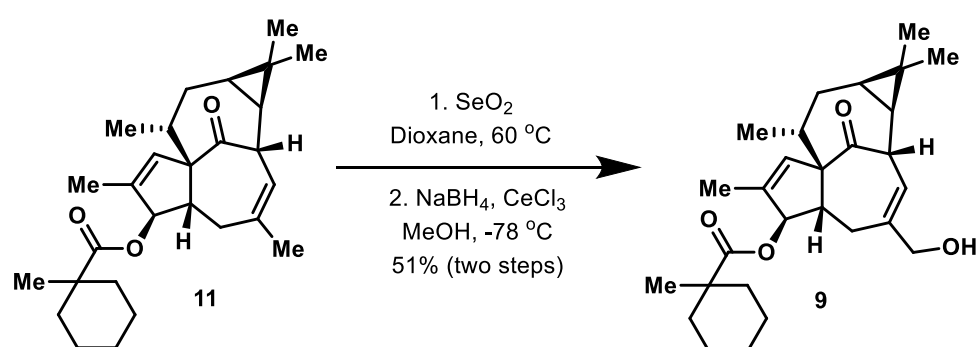

**Synthesis of 9:** To a solution of **11** (4.0 mg, 0.0094 mmol, 1.0 equiv) in THF (1 mL) was added SeO<sub>2</sub> (5.2 mg, 0.0465 mmol, 4.9 equiv) at room temperature. The flask was sealed with a plastic cap and the suspension was stirred at 60 °C for 1 h. After cooling to room temperature, the reaction mixture was filtered through a plug of silica gel SI-20

(hexanes/EtOAc = 1:1) to provide a clear yellow solution. A yellow oil was obtained after concentration *in vacuo*, and followed by dissolution in MeOH (1 mL). After cooling to  $-78\text{ }^{\circ}\text{C}$ ,  $\text{CeCl}_3 \cdot 7\text{H}_2\text{O}$  (17.6 mg, in 0.5 mL MeOH, 0.0472 mmol, 5.0 equiv) was added, then  $\text{NaBH}_4$  (1.8 mg, 0.0474 mmol, 5.0 equiv) was slowly added to the flask. After stirring for 10 min at  $-78\text{ }^{\circ}\text{C}$ ,  $\text{H}_2\text{O}$  (5 mL) was carefully added to quench this reaction, followed by dilution with  $\text{Et}_2\text{O}$  (5 mL). The mixture was extracted with  $\text{Et}_2\text{O}$  ( $3 \times 5\text{ mL}$ ) and the combined organic layers were dried over  $\text{MgSO}_4$ , filtered and concentrated under reduced pressure. Purification of the crude product by flash column chromatography (silica gel, hexanes/EtOAc = 2:1) afforded **9** (2.1 mg, 51%) as a colorless oil.

**Physical state:** colorless oil

$R_f = 0.25$  (Hex/EtOAc = 2:1; anisaldehyde)

**HRMS** ( $m/z$ ): calcd for  $\text{C}_{28}\text{H}_{40}\text{NaO}_4$ ,  $[\text{M}+\text{Na}]^+$ , 463.2824; found, 463.2822

$[\alpha]_D^{25} = +20.0^{\circ}$  ( $c = 0.21$ ,  $\text{CH}_2\text{Cl}_2$ )

**$^1\text{H}$  NMR** (600 MHz, Chloroform- $d$ )  $\delta$  6.02 (s, 1H), 5.94 (s, 1H), 4.89 (s, 1H), 3.91 (s, 2H), 3.56 (d,  $J = 11.6\text{ Hz}$ , 0H), 2.58 (dd,  $J = 18.1, 3.0\text{ Hz}$ , 1H), 2.47 (dd,  $J = 12.5, 3.3\text{ Hz}$ , 1H), 2.20 – 2.13 (m, 1H), 2.04 – 1.97 (m, 3H), 1.85 (dt,  $J = 15.8, 5.8\text{ Hz}$ , 1H), 1.77 (d,  $J = 1.3\text{ Hz}$ , 3H), 1.69 (ddd,  $J = 16.0, 8.9, 2.7\text{ Hz}$ , 1H), 1.60 – 1.55 (m, 2H), 1.39 – 1.19 (m, 6H), 1.15 (s, 3H), 1.08 (s, 3H), 1.05 (s, 3H), 1.01 (d,  $J = 7.1\text{ Hz}$ , 3H), 0.90 (dd,  $J = 12.0, 8.4\text{ Hz}$ , 1H), 0.73 (td,  $J = 8.5, 6.3\text{ Hz}$ , 1H).

**$^{13}\text{C}$  NMR** (151 MHz, Chloroform- $d$ )  $\delta$  207.9, 140.3, 138.4, 131.4, 123.7, 85.6, 75.3, 67.1, 49.2, 45.2, 43.4, 41.3, 35.6, 35.2, 30.6, 28.7, 25.8, 23.6, 23.5, 23.4, 22.8, 16.8, 15.6, 15.3.

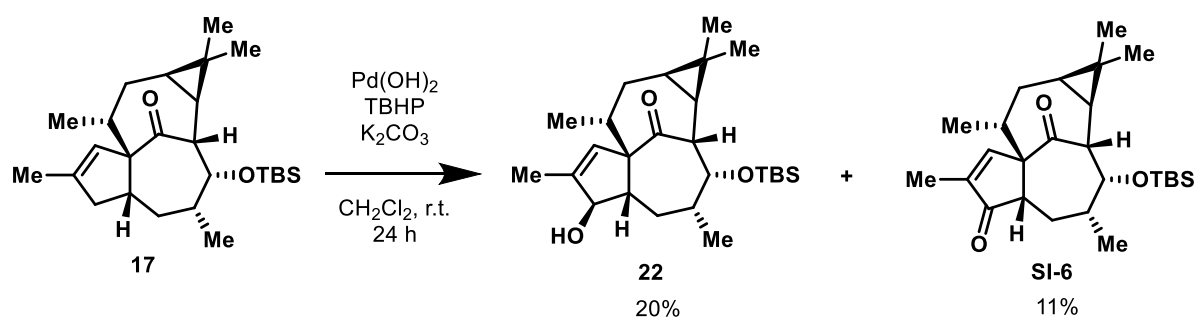

Synthesis of **22** and **SI-6**: To a solution of **17** (519.0 mg, 1.247 mmol, 1.0 equiv) in  $\text{CH}_2\text{Cl}_2$  (8 mL) was added 20%  $\text{Pd(OH)}_2$  on carbon (66 mg, 0.125 mmol, 0.1 equiv) and  $\text{K}_2\text{CO}_3$  (43 mg, 0.312 mmol, 0.25 equiv) at room temperature. The mixture was cooled to 0 °C, and TBHP (5.5 M in decane, 1.13 mL, 6.215 mmol, 5.0 equiv) was added with vigorous stirring. Then, the reaction mixture was allowed to warm to room temperature. After 24 h, the reaction mixture was filtered through a plug of silica gel ( $\text{CH}_2\text{Cl}_2$ ). The solvent was removed under reduced pressure. Purification of the crude product by flash column chromatography (silica gel, hexanes/EtOAc = 20:1 → 5:1) afforded **22** (105.1 mg, 20%) and **SI-6** (60 mg, 11%).

Spectroscopic data for **22**:

**Physical state**: colorless oil

$R_f$  = 0.25 (Hex/EtOAc = 5:1; anisaldehyde)

**HRMS** ( $m/z$ ): calcd for  $\text{C}_{26}\text{H}_{44}\text{NaO}_3\text{Si}$ ,  $[\text{M}+\text{Na}]^+$ , 455.2957; found, 455.2959

$[\alpha]_D^{25}$  = +49.4° ( $c$  = 0.34,  $\text{CH}_2\text{Cl}_2$ )

**$^1\text{H}$  NMR** (600 MHz, Chloroform- $d$ )  $\delta$  5.98 (d,  $J$  = 1.7 Hz, 1H), 3.96 (s, 1H), 3.85 (d,  $J$  = 3.9 Hz, 1H), 2.51 (d,  $J$  = 12.2 Hz, 1H), 2.15 (dd,  $J$  = 10.6, 1.8 Hz, 1H), 2.09 – 2.02 (m, 1H), 1.87 – 1.80 (m, 2H), 1.80 (d,  $J$  = 1.5 Hz, 3H), 1.78 – 1.73 (m, 1H), 1.35 – 1.29 (m, 1H), 1.27 (dd,  $J$  = 15.6, 3.4 Hz, 1H), 1.09 (s, 3H), 1.04 (s, 3H), 0.97 (d,  $J$  = 7.1 Hz, 3H), 0.93 (s, 9H), 0.88 (d,  $J$  = 6.9 Hz, 3H), 0.86 (dd,  $J$  = 12.2, 8.6 Hz, 1H), 0.67 (td,  $J$  = 9.2, 6.2 Hz, 1H), 0.14 (s, 3H), 0.03 (s, 3H).

**$^{13}\text{C}$  NMR** (151 MHz, Chloroform- $d$ )  $\delta$  206.6, 140.5, 132.0, 87.9, 75.0, 73.7, 54.1, 52.2, 44.9, 42.1, 38.2, 30.0, 28.7, 26.2, 24.3, 23.6, 23.0, 19.8, 18.4, 16.3, 15.7, 14.9, -3.7, -4.6.

Spectroscopic data for **SI-6**:

**Physical state:** colorless crystalline solid

$R_f = 0.33$  (Hex/EtOAc = 10:1; anisaldehyde)

**HRMS** ( $m/z$ ): calcd for  $C_{26}H_{42}NaO_3Si$ ,  $[M+Na]^+$ , 453.2801; found, 453.2809

$[\alpha]_D = +98.2^\circ$  ( $c = 0.17$ ,  $CH_2Cl_2$ )

**$^1H$  NMR** (600 MHz, Chloroform- $d$ )  $\delta$  7.59 (s, 1H), 3.87 (d,  $J = 3.6$  Hz, 1H), 2.57 (d,  $J = 12.1$  Hz, 1H), 2.38 (d,  $J = 10.8$  Hz, 1H), 1.92 – 1.81 (m, 3H), 1.79 – 1.76 (m, 1H), 1.77 (d,  $J = 1.5$  Hz, 3H), 1.59 (dq,  $J = 15.2, 1.6$  Hz, 1H), 1.27 (dt,  $J = 15.0, 11.4$  Hz, 1H), 1.11 (s, 3H), 1.06 (s, 3H), 1.01 – 0.96 (m, 1H), 0.95 (d,  $J = 6.7$  Hz, 3H), 0.93 (s, 9H), 0.90 (d,  $J = 6.9$  Hz, 3H), 0.73 (td,  $J = 8.2, 5.8$  Hz, 1H), 0.15 (s, 3H), 0.03 (s, 3H).

**$^{13}C$  NMR** (151 MHz, Chloroform- $d$ )  $\delta$  209.7, 204.6, 158.5, 140.4, 73.0, 69.9, 55.1, 52.7, 44.5, 42.8, 36.9, 31.1, 28.8, 26.1, 24.7, 23.6, 23.4, 19.5, 18.4, 17.3, 15.7, 10.6, -3.7, -4.5.

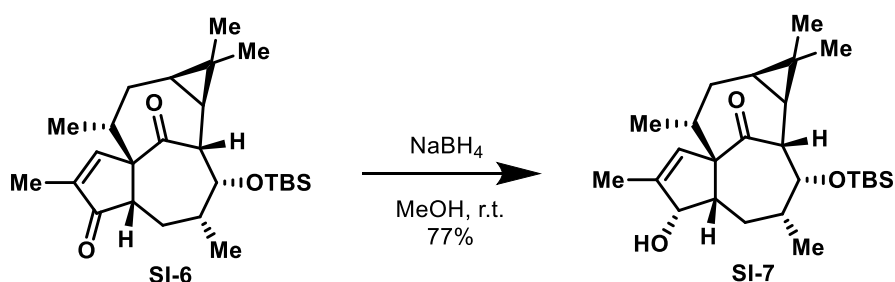

**Synthesis of SI-7:** To a solution of **SI-6** (60.0 mg, 0.14 mmol, 1.0 equiv) in MeOH (2 mL) at room temperature was slowly added  $NaBH_4$  (26.5 mg, 0.70 mmol, 5.0 equiv). After stirring at room temperature for 5 min, the reaction mixture was diluted with  $Et_2O$  (5 mL), followed by quenching with  $H_2O$  (5 mL). The mixture was extracted with  $Et_2O$  ( $3 \times 5$  mL) and the combined organic layers were dried over  $MgSO_4$ , filtered and concentrated under reduced pressure. Purification of the crude product by flash column chromatography (silica gel, hexanes/EtOAc = 5:1) afforded **SI-7** (47.2 mg, 77%) as a white foam.

**Physical state:** white foam

$R_f = 0.4$  (Hex/EtOAc = 4:1; anisaldehyde)

**HRMS** ( $m/z$ ): calcd for  $C_{26}H_{44}NaO_3Si$ ,  $[M+Na]^+$ , 455.2957; found, 455.2956

$[\alpha]_D^{25} = +20.5^\circ$  ( $c = 0.2$ ,  $CH_2Cl_2$ )

**$^1H$  NMR** (600 MHz, Chloroform- $d$ )  $\delta$  5.86 (t,  $J = 1.8$  Hz, 1H), 4.77 (s, 1H), 3.88 (d,  $J = 3.9$  Hz, 1H), 2.52 (d,  $J = 12.2$  Hz, 1H), 2.43 (dd,  $J = 10.9, 6.7$  Hz, 1H), 1.88 (ddd,  $J = 7.1, 4.5, 2.8$  Hz, 1H), 1.82 (ddd,  $J = 15.6, 6.0, 4.5$  Hz, 1H), 1.75 – 1.68 (m, 3H), 1.72 (t,  $J = 1.5$  Hz, 3H), 1.34 – 1.23 (m, 2H), 1.09 (s, 3H), 1.04 (s, 3H), 0.94 (s, 9H), 0.92 (d,  $J = 6.8$  Hz, 3H), 0.89 (d,  $J = 7.3$  Hz, 3H), 0.88 – 0.85 (m, 1H), 0.66 (ddd,  $J = 9.7, 8.6, 6.1$  Hz, 1H), 0.15 (s, 3H), 0.03 (s, 3H).

**$^{13}C$  NMR** (151 MHz, Chloroform- $d$ )  $\delta$  206.5, 140.6, 127.3, 77.5, 73.8, 73.0, 52.2, 49.9, 45.0, 38.2, 30.2, 28.7, 28.4, 26.2, 24.4, 23.8, 23.1, 19.9, 18.4, 16.8, 15.8, 13.6, -3.7, -4.6.

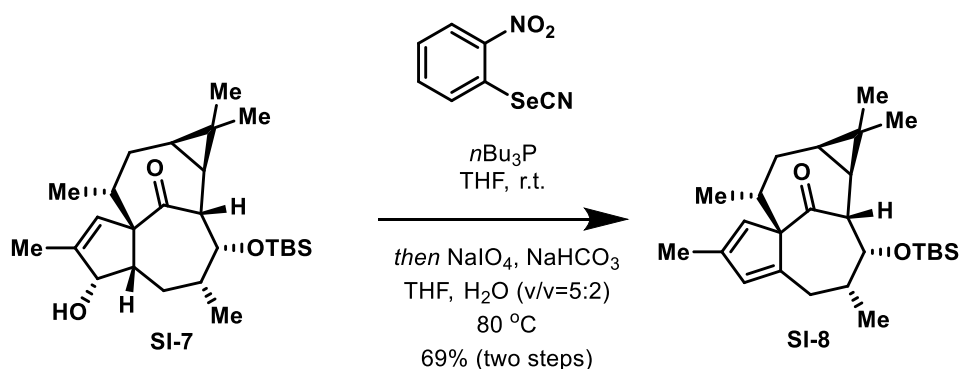

**Synthesis of SI-8:** To a solution of **SI-7** (46.2 mg, 0.107 mmol, 1.0 equiv) in THF (2 mL) was added 1-nitro-2-selenocyanatobenzene (29.0 mg, 0.127 mmol, 1.2 equiv) at room temperature.  $n$ -Bu $_3$ P (53  $\mu$ L, 0.212 mmol, 2.0 equiv) was then slowly added at room temperature. After stirring for 30 min, the reaction mixture was filtered through a plug of silica gel (Hexanes/EtOAc = 10:1). The solvent was removed under reduced pressure. The crude residue was dissolved in THF (5 mL). To this solution was added H $_2$ O (2 mL), NaIO $_4$  (228.9 mg, 1.070 mmol, 10.0 eq.) and Na $_2$ CO $_3$  (53.0 mg, 0.639 mmol, 6.0 equiv). The flask was sealed with a plastic cap and the reaction mixture was stirred at 80 °C for 2 h. After filtration, the filtrate was extracted with Et $_2$ O (3  $\times$  5 mL) and the combined organic layers were dried over MgSO $_4$ , filtered and concentrated

under reduced pressure. Purification of the crude product by flash column chromatography (silica gel, hexanes/EtOAc = 20:1) afforded **SI-8** (30.5 mg, 69%).

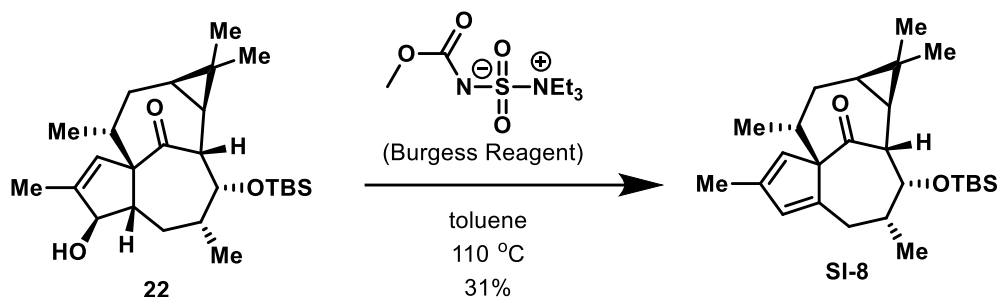

**Synthesis of SI-8:** To a solution of **22** (78.0 mg, 0.18 mmol, 1.0 equiv) in toluene (2 mL) was added Burgess reagent (56.0 mg, 0.24 mmol, 1.3 equiv) at room temperature under argon atmosphere. The reaction mixture was stirred at 110 °C for 1 min. Then, the solvent was removed under reduced pressure. Purification of the crude product by flash column chromatography (silica gel, hexanes/EtOAc = 20:1) afforded **SI-8** (23.3 mg, 31%).

**Physical state:** pale yellow foam

$R_f$  = 0.5 (Hex/EtOAc = 10:1; anisaldehyde)

**HRMS** ( $m/z$ ): calcd for  $C_{26}H_{42}NaO_2Si$ ,  $[M+Na]^+$ , 437.2852; found, 437.2853

$[\alpha]_D^{25}$  =  $-54.7^\circ$  ( $c$  = 0.17,  $CH_2Cl_2$ )

**$^1H$  NMR** (600 MHz, Chloroform- $d$ )  $\delta$  5.98 (s, 1H), 5.92 (s, 1H), 4.09 (dd,  $J$  = 8.6, 3.8 Hz, 1H), 3.26 (dd,  $J$  = 11.5, 3.9 Hz, 1H), 2.71 (d,  $J$  = 14.5 Hz, 1H), 2.55 (h,  $J$  = 6.9 Hz, 1H), 2.48 (dd,  $J$  = 14.5, 5.3 Hz, 1H), 2.43 – 2.34 (m, 1H), 2.10 – 2.00 (m, 2H), 1.90 (d,  $J$  = 1.6 Hz, 3H), 1.21 (s, 3H), 1.11 (dd,  $J$  = 11.4, 9.1 Hz, 1H), 1.03 (s, 3H), 0.92 (s, 9H), 0.73 (dt,  $J$  = 8.7, 4.1 Hz, 1H), 0.66 (d,  $J$  = 7.5 Hz, 3H), 0.62 (d,  $J$  = 6.5 Hz, 3H), 0.06 (s, 2H), 0.03 (s, 3H).

**$^{13}C$  NMR** (151 MHz, Chloroform- $d$ )  $\delta$  208.0, 142.4, 142.3, 136.5, 130.5, 81.1, 71.6, 46.8, 37.7, 36.8, 33.4, 33.1, 29.0, 26.0, 24.8, 24.1, 21.4, 18.5, 18.4, 15.6, 15.4, 13.4, -4.6, -4.7.

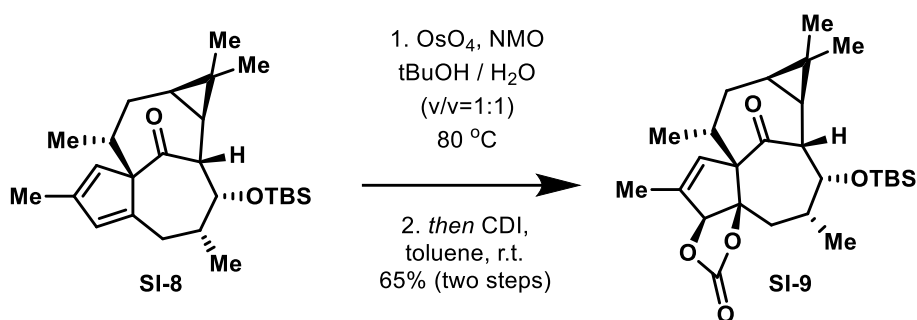

**Synthesis of SI-9:** To a solution of **SI-8** (46.2 mg, 0.107 mmol, 1.0 equiv) in *t*-BuOH (1 mL) and H<sub>2</sub>O (1 mL) was added OsO<sub>4</sub> (2.5 wt% in *t*-BuOH, 0.31 mL, 0.0214 mmol 0.2 equiv) and NMO (50% w/w in H<sub>2</sub>O, 0.15 mL, 0.642 mmol, 6.0 equiv) at room temperature. The reaction mixture was stirred at 80 °C for 4 h. Saturated Na<sub>2</sub>SO<sub>3</sub> (5 mL) was added, the mixture was extracted with Et<sub>2</sub>O (3 × 5 mL) and the combined organic layers were dried over MgSO<sub>4</sub>, filtered and concentrated under reduced pressure. The crude product was dissolved in toluene (2 mL). To this solution was added *N,N*-carbonyldiimidazole (54 mg, 0.333 mmol, 3.1 equiv) at room temperature. The reaction mixture was stirred overnight at room temperature before quenching with H<sub>2</sub>O (2 mL). The mixture was extracted with Et<sub>2</sub>O (3 × 5 mL) and the combined organic layers were dried over MgSO<sub>4</sub>, filtered and concentrated under reduced pressure. Purification of the crude product by flash column chromatography (silica gel, hexanes/EtOAc = 20:1) afforded **SI-9** (38.8 mg, 65%) as a colorless oil.

**Physical state:** colorless oil

**R<sub>f</sub>** = 0.2 (Hex/EtOAc = 20:1; anisaldehyde)

**HRMS** (*m/z*): calcd for C<sub>27</sub>H<sub>43</sub>O<sub>5</sub>Si, [M+H]<sup>+</sup>, 475.2880; found, 475.2882

[α]<sub>D</sub><sup>20</sup> = +19.6° (*c* = 0.27, CH<sub>2</sub>Cl<sub>2</sub>)

**<sup>1</sup>H NMR** (600 MHz, Chloroform-*d*) δ 6.03 (d, *J* = 1.8 Hz, 1H), 4.55 (s, 1H), 3.86 (d, *J* = 3.3 Hz, 1H), 2.72 (d, *J* = 11.8 Hz, 1H), 2.30 – 2.20 (m, 1H), 2.21 – 2.11 (m, 1H), 2.01 (ddd, *J* = 15.9, 6.6, 2.7 Hz, 1H), 1.91 (dd, *J* = 15.5, 11.4 Hz, 1H), 1.87 (d, *J* = 1.6 Hz, 3H), 1.81 (ddd, *J* = 16.0, 7.6, 6.5 Hz, 1H), 1.61 (d, *J* = 15.6, 1H), 1.15 (s, 3H), 1.04 (s, 3H), 1.00 (dd, *J* = 11.8, 8.8 Hz, 1H), 0.94 (s, 9H), 0.93 (d, *J* = 6.6 Hz, 3H), 0.85 (d, *J* = 6.8 Hz, 3H), 0.67 (dt, *J* = 8.8, 6.5 Hz, 1H), 0.16 (s, 3H), 0.05 (s, 3H).

**$^{13}\text{C}$  NMR** (151 MHz, Chloroform-*d*)  $\delta$  205.0, 154.4, 135.1, 134.7, 95.1, 90.0, 77.1, 72.7, 52.4, 41.7, 39.0, 31.2, 28.8, 26.1, 25.0, 23.6, 23.2, 19.8, 18.4, 15.7, 15.3, -3.6, -4.4.

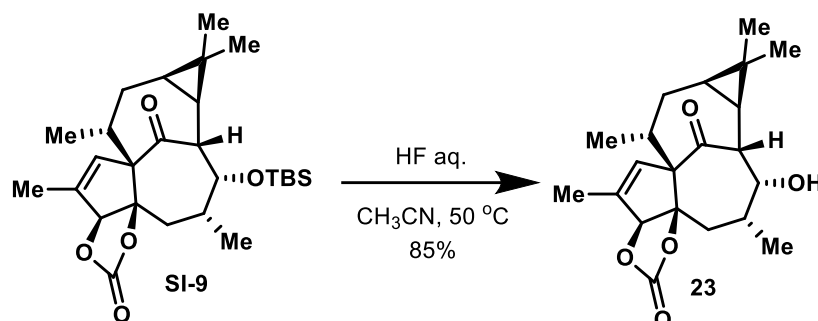

**Synthesis of **23**:** A plastic Falcon<sup>®</sup> tube was charged with **SI-9** (38.8 mg, 0.082 mmol, 1.0 equiv) and CH<sub>3</sub>CN (3 mL). 48% aqueous HF (0.15 mL, 3.60 mmol, 43.9 equiv) was added and mixture was heated to 50 °C. After stirring for 3 h, the reaction mixture was cooled to room temperature and quenched by the slow addition of saturated aqueous Na<sub>2</sub>SO<sub>3</sub> (6 mL). The mixture was extracted with EtOAc (3 × 8 mL) and the combined organic layers were dried over MgSO<sub>4</sub>, filtered and concentrated under reduced pressure. Purification of the crude product by flash column chromatography (silica gel, hexanes/EtOAc = 4:1) afforded **23** (25.0 mg, 85%) as a colorless crystalline solid.

**Physical state:** colorless crystalline solid

$R_f$  = 0.25 (Hex/EtOAc = 3:1; anisaldehyde)

**HRMS** ( $m/z$ ): calcd for C<sub>21</sub>H<sub>28</sub>NaO<sub>5</sub>, [M+Na]<sup>+</sup>, 383.1834; found, 383.1848

$[\alpha]_D^{25}$  = +12.7° ( $c$  = 0.15, CH<sub>2</sub>Cl<sub>2</sub>)

**$^1\text{H}$  NMR** (600 MHz, Chloroform-*d*)  $\delta$  5.92 (d,  $J$  = 1.6 Hz, 1H), 4.58 (s, 1H), 3.87 (s, 1H), 3.19 (d,  $J$  = 7.8 Hz, 1H), 2.87 (dd,  $J$  = 11.3, 1.2 Hz, 1H), 2.34 (ddd,  $J$  = 9.6, 6.9, 2.5 Hz, 1H), 2.15 (dtq,  $J$  = 16.9, 6.9, 3.5 Hz, 1H), 2.08 – 1.99 (m, 1H), 1.90 (d,  $J$  = 1.5 Hz, 3H), 1.84 (ddd,  $J$  = 16.1, 9.6, 6.6 Hz, 1H), 1.75 (dd,  $J$  = 15.8, 11.3 Hz, 1H), 1.69 (dd,  $J$  = 15.6, 2.4 Hz, 1H), 1.18 (s, 3H), 1.11 (dd,  $J$  = 11.3, 8.9 Hz, 1H), 1.040 (s, 3H), 1.037 (d,  $J$  = 7.2 Hz, 3H), 0.81 (d,  $J$  = 6.8 Hz, 3H), 0.71 (ddd,  $J$  = 8.9, 6.5, 4.6 Hz, 1H).



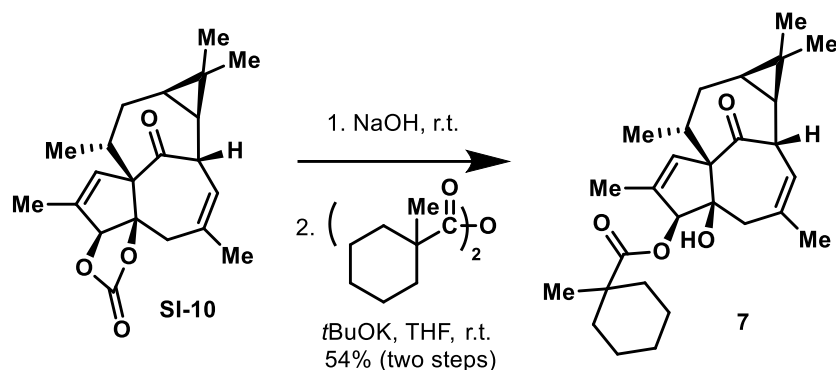

**Synthesis of 7:** To a solution of **SI-10** (4.2 mg, 0.0123 mmol, 1.0 equiv) in THF (0.5 mL) was added 10% NaOH<sub>(aq)</sub> (0.5 mL) at room temperature. After stirring for 1 h, the reaction mixture was quenched by saturated NH<sub>4</sub>Cl<sub>(aq)</sub> (2 mL). The mixture was extracted with Et<sub>2</sub>O (5 × 3 mL) and the combined organic layers were dried over MgSO<sub>4</sub>, filtered and concentrated under reduced pressure. The crude residue and 1-methylcyclohexane-1-carboxylic anhydride (32.7 mg, 0.123 mmol, 10.0 equiv) was dissolved in THF (2 mL). To this stirring solution was slowly added *t*-BuOK (6.9 mg, 0.0616 mmol, 5.0 equiv) at room temperature. The reaction mixture was stirred at room temperature for 2 min and quenched by the slow addition of H<sub>2</sub>O (2 mL). The mixture was extracted with EtOAc (3 × 3 mL) and the combined organic layers were dried over MgSO<sub>4</sub>, filtered and concentrated under reduced pressure. Purification of the crude product by flash column chromatography (silica gel, hexanes/EtOAc = 14:1) afforded **7** (2.9 mg, 54%) as a colorless oil.

**Physical state:** colorless oil

$R_f$  = 0.2 (Hex/EtOAc = 14:1; anisaldehyde)

**HRMS** ( $m/z$ ): calcd for C<sub>28</sub>H<sub>41</sub>O<sub>4</sub>, [M+H]<sup>+</sup>, 441.3005; found, 441.3010

$[\alpha]_D^{25}$  = +67.2° ( $c$  = 0.25, CH<sub>2</sub>Cl<sub>2</sub>)

**<sup>1</sup>H NMR** (600 MHz, Chloroform-*d*)  $\delta$  5.99 (q,  $J$  = 1.6 Hz, 1H), 5.71 (s, 1H), 4.92 (s, 1H), 4.06(d,  $J$  = 1.6 Hz, 1H), 2.49 (s, 1H), 2.43 – 2.28 (m, 3H), 2.19 (ddd,  $J$  = 15.7, 7.9, 3.1 Hz, 1H), 2.09 – 1.98 (m, 2H), 1.81 – 1.72 (m, 1H), 1.76 (d,  $J$  = 1.5 Hz, 3H), 1.64 (s, 3H), 1.62 – 1.48 (m, 2H), 1.46 – 1.22 (m, 6H), 1.20 (s, 3H), 1.12 (s, 3H), 1.04 (s, 3H), 0.96 (d,  $J$  = 7.1 Hz, 3H), 0.91 (dd,  $J$  = 11.8, 8.4 Hz, 1H), 0.68 (td,  $J$  = 8.1, 6.2 Hz, 1H).

**$^{13}\text{C}$  NMR** (151 MHz, Chloroform-*d*)  $\delta$  209.5, 178.9, 136.1, 134.1, 132.6, 123.8, 85.8, 81.0, 75.1, 48.0, 44.2, 43.8, 37.4, 35.8, 35.7, 31.6, 28.8, 25.8, 24.8, 23.8, 23.7, 23.6, 23.39, 23.35, 18.3, 15.72, 15.67.

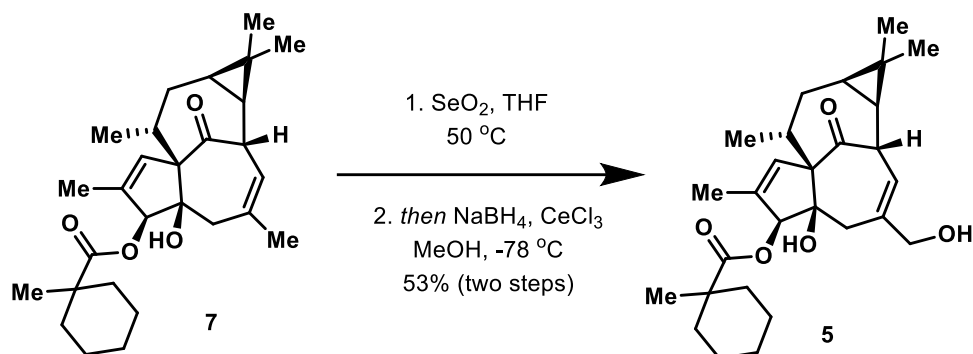

**Synthesis of **5**:** To a solution of **7** (2.0 mg, 0.0045 mmol, 1.0 equiv) in THF (1 mL) was added  $\text{SeO}_2$  (2.5 mg, 0.023 mmol, 5.0 equiv) at room temperature. The flask was sealed with a plastic cap and the suspension was stirred at 50 °C for 1 h. After cooling to room temperature, the reaction mixture was filtered through a plug of silica gel (hexanes/EtOAc = 1:1) to provide a clear yellow solution. A yellow oil was obtained after concentration *in vacuo*, followed by dissolution in MeOH (1 mL). After cooling to -78 °C,  $\text{CeCl}_3 \cdot 7\text{H}_2\text{O}$  (8.5 mg, in 0.5 mL MeOH, 0.023 mmol, 5.0 equiv) was added, then  $\text{NaBH}_4$  (1.7 mg, 0.045 mmol, 10.0 equiv) was slowly added to the flask. After stirring for 10 min at -78 °C,  $\text{H}_2\text{O}$  (5 mL) was carefully added to quench this reaction, followed by dilution with  $\text{Et}_2\text{O}$  (5 mL). The mixture was extracted with  $\text{Et}_2\text{O}$  (3  $\times$  5 mL) and the combined organic layers were dried over  $\text{MgSO}_4$ , filtered and concentrated under reduced pressure. Purification of the crude product by flash column chromatography (silica gel, hexanes/EtOAc = 2:1) afforded **5** (1.1 mg, 53%) as a colorless oil.

**Physical state:** colorless oil

$R_f$  = 0.2 (Hex/EtOAc = 2:1; anisaldehyde)

**HRMS** ( $m/z$ ): calcd for  $\text{C}_{28}\text{H}_{40}\text{NaO}_5$ ,  $[\text{M}+\text{Na}]^+$ , 479.2773; found, 479.2779

$[\alpha]_D^{25}$  = +36.0° ( $c$  = 0.05,  $\text{CH}_2\text{Cl}_2$ )

**<sup>1</sup>H NMR** (600 MHz, Chloroform-*d*)  $\delta$  6.00 (q,  $J$  = 2.4 Hz, 1H), 5.98 (d,  $J$  = 1.7 Hz, 1H), 4.97 (s, 1H), 4.11 (d,  $J$  = 11.7 Hz, 1H), 3.93 (s, 2H), 2.56 (d,  $J$  = 17.1 Hz, 2H), 2.55 (s, 1H), 2.41 (td,  $J$  = 6.8, 3.0 Hz, 1H), 2.37 (d,  $J$  = 18.4 Hz, 1H), 2.18 (ddt,  $J$  = 17.0, 12.5, 9.1 Hz, 1H), 2.07 – 2.00 (m, 2H), 1.82 – 1.77 (m, 1H), 1.76 (d,  $J$  = 1.6 Hz, 3H), 1.62 – 1.56 (m, 2H), 1.44 – 1.27 (m, 6H), 1.20 (s, 3H), 1.12 (s, 3H), 1.05 (s, 3H), 0.96 (d,  $J$  = 7.0 Hz, 3H), 0.96 – 0.93 (m, 1H), 0.71 (q,  $J$  = 7.6 Hz, 1H).

**<sup>13</sup>C NMR** (151 MHz, Chloroform-*d*)  $\delta$  209.1, 178.9, 137.7, 136.4, 132.4, 125.7, 85.8, 80.8, 75.1, 67.6, 44.2, 43.8, 43.4, 37.2, 35.8, 35.7, 31.7, 28.8, 25.8, 24.0, 23.6, 23.5, 23.39, 23.35, 18.5, 15.72, 15.70.

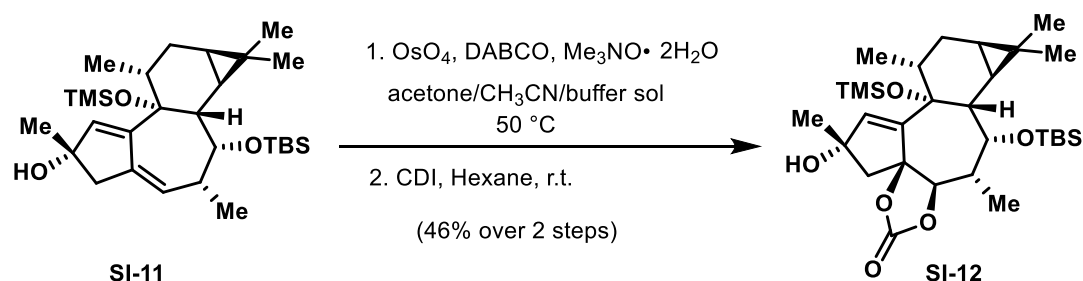

**Synthesis of SI-12:** A 100 mL round-bottomed flask was charged with **SI-11** (661 mg, 1.31 mmol, 1.0 equiv), Me<sub>3</sub>NO·2H<sub>2</sub>O (1455 mg, 13.1 mmol, 10 equiv) and DABCO (160 mg, 1.31 mmol, 1.0 equiv) in acetone/CH<sub>3</sub>CN/\*0.5 M buffer solution (26.2 mL, 0.05 M, **4:3:3**). Then, OsO<sub>4</sub> solution (2.5 wt. % in *tert*-butanol, 0.65 mL, 0.0655 mmol, 0.05 equiv) was added to this flask. The reaction mixture was stirred vigorously at 50 °C for 18 h, before quenching with saturated aqueous Na<sub>2</sub>SO<sub>3</sub> (20 mL). (\*After 15 h, the reaction was monitored by TLC every 3 h; when the conversion stopped, the reaction was quenched immediately to prevent further side reactions.) The reaction mixture was extracted with ether (3 × 20 mL). The combined organic layers were washed with brine and dried over Na<sub>2</sub>SO<sub>4</sub>, filtered and concentrated *in vacuo* to afford a crude diol ( $R_f$  = 0.33 (Hex/EtOAc = 7:3; anisaldehyde)).

[\*0.5 M buffer solution: pH=3, Na<sub>2</sub>HPO<sub>4</sub> (280 mg) and citric acid (840 mg) was dissolved in H<sub>2</sub>O (10 mL).]

The crude diol was dissolved in hexanes (26.2 mL, 0.05 M) and *N,N*-carbonyldiimidazole (1.05 g, 6.5 mmol, 5.0 equiv) was added. The solution was stirred

at room temperature for 11 h and quenched by water (20 mL). The aqueous layer was separated and extracted further with hexanes ( $2 \times 30$  mL). The combined organic layers were dried over  $\text{Na}_2\text{SO}_4$ , filtered and concentrated *in vacuo*. Purification of the crude product was accomplished by subjecting the crude solution to flash column chromatography (silica gel, column packed in hexanes, then hexanes/EtOAc = 20:1  $\rightarrow$  9:1) afforded desired product **SI-12** (342 mg, 46% over 2 steps) as a white foam.

Spectral data were identical to those previously reported.<sup>1</sup>

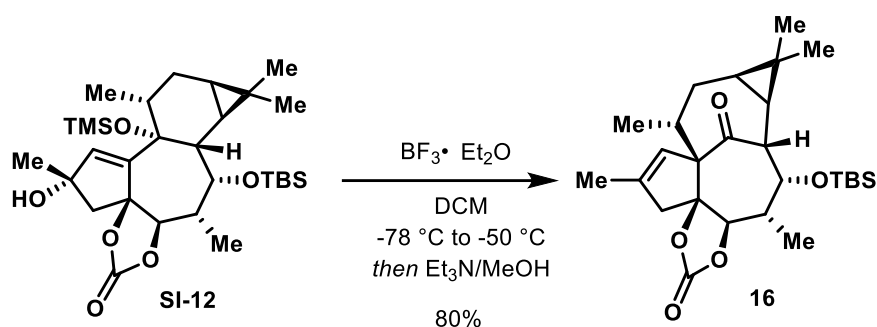

**Synthesis of 16:** To a solution of **SI-12** (191 mg, 0.338 mmol, 1.0 equiv) in  $\text{CH}_2\text{Cl}_2$  (7 mL) was added  $\text{BF}_3 \cdot \text{Et}_2\text{O}$  (420  $\mu\text{L}$ , 3.38 mmol, 10 equiv) dropwise at  $-78\text{ }^\circ\text{C}$ . The reaction mixture was stirred at this temperature for 2 min before warming to  $-50\text{ }^\circ\text{C}$ . After stirring for 30 min, a 1:1 mixture of  $\text{Et}_3\text{N}/\text{MeOH}$  (3 mL) was added at  $-40\text{ }^\circ\text{C}$ . The solution was stirred for an additional 2 min and then saturated aqueous  $\text{NaHCO}_3$  (5 mL) was added. The reaction mixture was warmed to room temperature and extracted with  $\text{CH}_2\text{Cl}_2$  ( $3 \times 25$  mL). The combined organic layers were dried over  $\text{Na}_2\text{SO}_4$ , filtered and concentrated under reduced pressure. Purification of the crude product by flash column chromatography (silica gel, column packed in  $\text{CH}_2\text{Cl}_2$ , then hexanes/EtOAc = 20:1  $\rightarrow$  10:1  $\rightarrow$  5:1) afforded **16** (128 mg, 80%) as a white foam.

Spectral data were identical to those previously reported.<sup>1</sup>

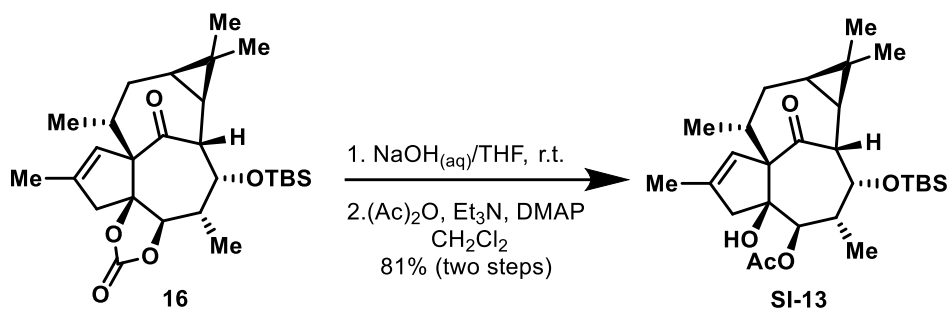

**Synthesis of SI-13:** To a solution of **16** (590 mg, 1.24 mmol, 1 equiv) in THF (10 mL) was added 10%  $\text{NaOH}_{(\text{aq})}$  (10 mL). The reaction mixture was stirred vigorously at room temperature for 1 h. The reaction mixture was then extracted with  $\text{Et}_2\text{O}$  ( $3 \times 20$  mL) and the combined organic layers were dried over  $\text{MgSO}_4$ , filtered and concentrated under reduced pressure. The crude residue was dissolved in  $\text{CH}_2\text{Cl}_2$  (5 mL). To this solution was added  $\text{Ac}_2\text{O}$  (0.14 mL, 1.49 mmol, 1.2 equiv),  $\text{Et}_3\text{N}$  (0.26 mL, 1.86 mmol, 1.5 equiv) and DMAP (15.0 mg, 0.123 mmol, 0.1 equiv) at room temperature. The reaction mixture was stirred at room temperature for 2 h before addition of saturated  $\text{NH}_4\text{Cl}$  (10 mL). The mixture was extracted with  $\text{CH}_2\text{Cl}_2$  ( $3 \times 10$  mL) and the combined organic layers were dried over  $\text{MgSO}_4$ , filtered and concentrated under reduced pressure. Purification of the crude product by flash column chromatography (silica gel, hexanes/ $\text{EtOAc}$  = 5:1) afforded **SI-13** (490 mg, 81%) as a white solid.

**Physical state:** white solid

$R_f$  = 0.51 (Hex/ $\text{EtOAc}$  = 7:3; anisaldehyde)

**HRMS** ( $m/z$ ): calcd for  $\text{C}_{28}\text{H}_{46}\text{NaO}_5\text{Si}$ ,  $[\text{M}+\text{Na}]^+$ , 513.3012; found, 513.3006

$[\alpha]_{\text{D}} = +47.7^\circ$  ( $c$  = 0.7,  $\text{CH}_2\text{Cl}_2$ )

This compound shows two sets of NMR peaks due to restricted rotation (rotamers, ratio = 4 : 6)

**$^1\text{H}$  NMR** (600 MHz,  $\text{Chloroform-}d$ )  $\delta$  5.64 (s, 1H), 5.04 (s, 0.4H), 4.90 (d,  $J$  = 10.5 Hz, 0.6H), 3.89 (d,  $J$  = 10.7 Hz, 0.4H), 3.85 (d,  $J$  = 4.1 Hz, 1H), 3.19 (d,  $J$  = 12.0 Hz, 0.4H), 3.01 (d,  $J$  = 12.0 Hz, 0.6H), 2.90 (ddd,  $J$  = 10.8, 7.0, 4.0 Hz, 0.4H), 2.58 (d,  $J$  = 15.7 Hz, 0.4H), 2.52 – 2.39 (m, 1.6H), 2.39 – 2.31 (m, 0.6H), 2.29 – 2.20 (m, 1.4H), 2.17 – 2.12 (m, 0.6H), 2.11 (s, 1.2H), 2.09 (s, 1.8), 2.05 (brs, 0.6H), 1.72 (dq,  $J$  = 15.4, 5.1,

4.5 Hz, 1H), 1.67 (s, 1.2H), 1.60 (s, 1.8H), 1.09 (s, 3H), 1.03 (s, 3H), 0.94 (s, 9H), 0.93 – 0.84 (m, 7H), 0.62 (dq,  $J = 13.1, 6.7, 4.7$  Hz, 1H), 0.17 (s, 1.2H), 0.16 (s, 1.8H), 0.06 (s, 1.2H), 0.04 (s, 1.8H).

**$^{13}\text{C}$  NMR** (151 MHz, Chloroform- $d$ )  $\delta$  207.2 , 206.2 , 174.1 , 169.3 , 136.0 , 135.2 , 125.8 , 125.7 , 86.7 , 86.1 , 85.6 , 74.9 , 73.8 , 72.7 , 72.1 , 49.3 , 48.8 , 48.1 , 46.6 , 42.9 , 40.5 , 35.8 , 35.5 , 30.4 , 28.71 , 28.65 , 26.22 , 26.20 , 24.9 , 24.4 , 24.2 , 23.12 , 23.05 , 21.2 , 20.7 , 18.5 , 17.4 , 17.3 , 17.2 , 17.1 , 16.5 , 15.90 , 15.85 , 15.7 , -3.50 , -3.52 , -4.5.

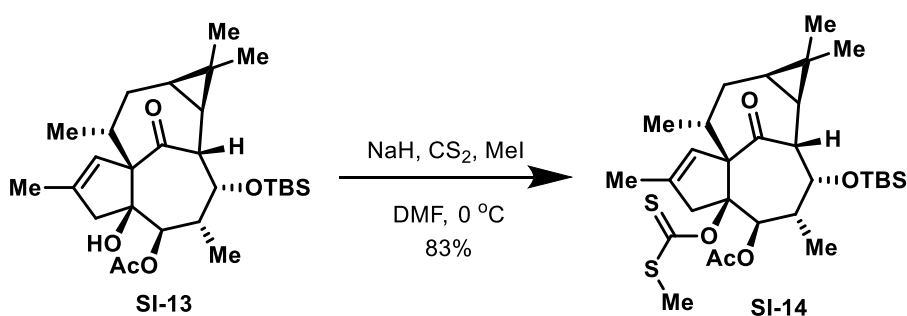

**Synthesis of SI-14 :** To a stirred solution of **SI-13** (490 mg, 1.0 mmol, 1.0 equiv) in DMF (10 mL) was added NaH (60% in mineral oil, 80 mg, 2.0 mmol, 2.0 equiv) at 0 °C. After stirring for 15 min, CS<sub>2</sub> (0.6 mL, 10.0 mmol, 10 equiv) was added to the suspension at the same temperature. The reaction mixture was allowed warm to room temperature and stirred for 40 min. Then, MeI (0.62 mL, 10.0 mmol, 10 equiv) was added to the mixture. After stirring for 40 min at room temperature, the reaction mixture diluted with Et<sub>2</sub>O (30 mL) and quenched by H<sub>2</sub>O (30 mL). The mixture was extracted with Et<sub>2</sub>O (3 × 30 mL) and the combined organic layers were dried over MgSO<sub>4</sub>, filtered and concentrated under reduced pressure. Purification of the crude product by flash column chromatography (silica gel, hexanes/EtOAc = 20:1) afforded **SI-14** (483.4 mg, 83%) as a pale yellow foam.

**Physical state:** pale yellow foam

$R_f$  = 0.62 (Hex/EtOAc = 4:1; anisaldehyde)

**HRMS** ( $m/z$ ): calcd for C<sub>30</sub>H<sub>48</sub>NaO<sub>5</sub>S<sub>2</sub>Si, [M+Na]<sup>+</sup>, 603.2610; found, 603.2606

$[\alpha]_D = +91.3^\circ$  ( $c = 0.9$ ,  $\text{CH}_2\text{Cl}_2$ )

$^1\text{H NMR}$  (600 MHz,  $\text{CHCl}_3$ )  $\delta$  5.70 (s, 1H), 5.10 (d,  $J = 10.2$  Hz, 1H), 3.86 (d,  $J = 3.5$  Hz, 1H), 3.17 (d,  $J = 16.6$  Hz, 1H), 2.93 (d,  $J = 16.4$  Hz, 1H), 2.86 (d,  $J = 11.9$  Hz, 1H), 2.55 (s, 3H), 2.39 – 2.18 (m, 3H), 2.06 (s, 3H), 1.85 (ddd,  $J = 15.9, 5.9, 3.6$  Hz, 1H), 1.20 (s, 3H), 1.06 (s, 3H), 0.99 – 0.94 (m, 1H), 0.96 (d,  $J = 7.0$  Hz, 3H), 0.94 (s, 9H), 0.83 (d,  $J = 7.0$  Hz, 3H), 0.72 – 0.65 (m, 1H), 0.16 (s, 3H), 0.02 (s, 3H).

$^{13}\text{C NMR}$  (151 MHz,  $\text{CHCl}_3$ )  $\delta$  212.6, 205.0, 169.0, 136.0, 124.7, 101.2, 77.2, 74.6, 72.0, 50.4, 43.7, 42.8, 36.2, 31.4, 28.7, 26.1, 25.4, 25.1, 22.8, 20.6, 20.5, 18.4, 17.3, 17.2, 16.2, 15.0, -3.5, -4.5.

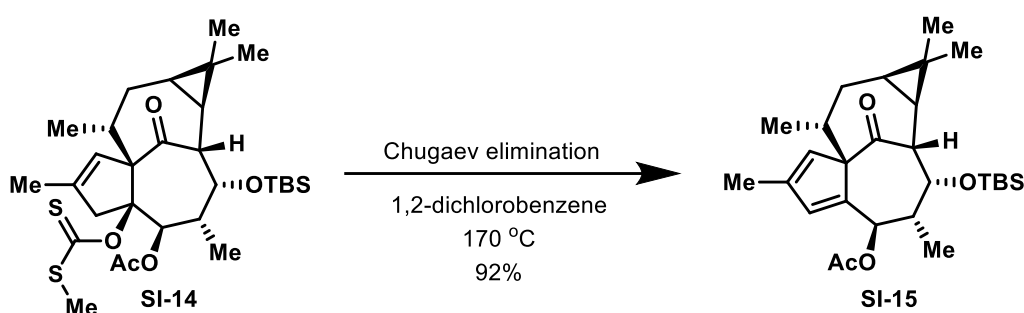

Synthesis of **SI-15**: Compound **SI-14** (483.4 mg, 0.83 mmol, 1.0 equiv) was dissolved in degassed 1,2-dichlorobenzene (15 mL) under argon. The mixture was stirred at 170 °C for 5 min. After cooling to room temperature, the reaction mixture was passed through a short plug of silica gel, eluting with hexanes (to remove 1,2-dichlorobenzene), followed by 20:1 hexanes:EtOAc to afford **SI-15** (365.9 mg, 92%) as a pale yellow foam.

**Physical state**: pale yellow foam

$R_f = 0.55$  (Hex/EtOAc = 8:2; anisaldehyde)

**HRMS** ( $m/z$ ): calcd for  $\text{C}_{28}\text{H}_{44}\text{NaO}_4\text{Si}$ ,  $[\text{M}+\text{Na}]^+$ , 495.2907; found, 495.2904

$[\alpha]_D = +3.6^\circ$  ( $c = 0.89$ ,  $\text{CH}_2\text{Cl}_2$ )

$^1\text{H NMR}$  (600 MHz,  $\text{CHCl}_3$ )  $\delta$  6.22 (d,  $J = 1.4$  Hz, 1H), 6.09 (s, 1H), 5.87 (d,  $J = 5.3$  Hz, 1H), 4.17 (dd,  $J = 8.3, 3.8$  Hz, 1H), 3.87 (dd,  $J = 11.3, 3.9$  Hz, 1H), 2.94 (h,

$J = 7.0$  Hz, 1H), 2.70 – 2.59 (m, 1H), 2.06 (s, 3H), 2.03 (dt,  $J = 5.2, 2.9$  Hz, 2H), 1.90 (d,  $J = 1.4$  Hz, 3H), 1.26 (s, 3H), 1.16 (dd,  $J = 11.3, 9.3$  Hz, 1H), 1.04 (s, 3H), 0.92 (s, 9H), 0.75 (dt,  $J = 8.4, 3.9$  Hz, 1H), 0.64 (d,  $J = 7.6$  Hz, 3H), 0.61 (d,  $J = 6.7$  Hz, 3H), 0.08 (s, 3H), 0.03 (s, 3H).

**$^{13}\text{C}$  NMR** (151 MHz, Chloroform- $d$ )  $\delta$  207.5, 169.6, 141.4, 141.0, 138.3, 133.7, 82.9, 79.4, 69.5, 45.9, 40.8, 37.3, 33.0, 29.0, 25.9, 24.8, 24.1, 21.5, 21.2, 18.4, 18.3, 15.4, 15.1, 12.8, -4.6, -4.7.

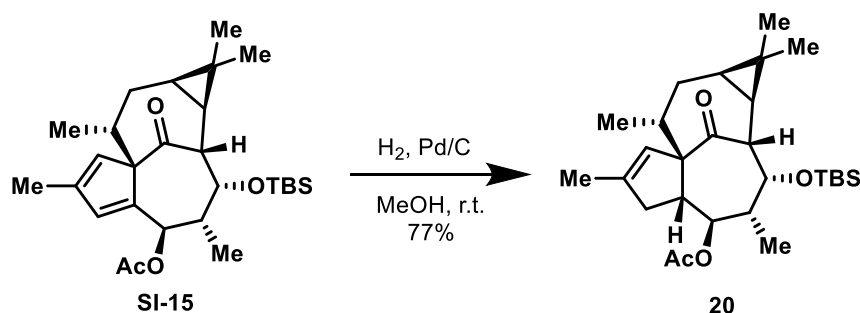

**Synthesis of **20**:** To a solution of **SI-15** (365.9 mg, 0.77 mmol, 1.0 equiv) in MeOH (10 mL) was added 10% Pd on carbon (82 mg, 0.077 mmol, 0.1 equiv).  $\text{H}_2$  was bubbled into the stirring mixture for 20 s at room temperature. Then, the solvent was concentrated under reduced pressure. Purification of the crude product by flash column chromatography (silica gel, hexanes/EtOAc = 80:1  $\rightarrow$  50:1) afforded **20** (282.7 mg, 77%) as a colorless oil.

**Physical state:** colorless oil

$R_f = 0.5$  (Hex/EtOAc = 10:1; anisaldehyde)

**HRMS** ( $m/z$ ): calcd for  $\text{C}_{28}\text{H}_{46}\text{NaO}_4\text{Si}$ ,  $[\text{M}+\text{Na}]^+$ , 497.3063; found, 497.3072

$[\alpha]_D^{25} = +25.8^\circ$  ( $c = 0.12$ ,  $\text{CH}_2\text{Cl}_2$ )

**$^1\text{H}$  NMR** (600 MHz, Chloroform- $d$ )  $\delta$  5.66 (s, 1H), 4.70 (s, 1H), 3.88 (d,  $J = 4.3$  Hz, 1H), 2.61 (d,  $J = 12.1$  Hz, 1H), 2.56 – 2.44 (m, 2H), 2.05 (s, 3H), 2.04 – 1.97 (m, 2H), 1.89 (d,  $J = 16.2$  Hz, 1H), 1.83 (dt,  $J = 15.7, 5.5$  Hz, 1H), 1.68 (ddd,  $J = 14.8, 10.2, 5.5$  Hz, 1H), 1.65 (s, 3H), 1.10 (s, 3H), 1.04 (s, 3H), 0.94 (s, 9H), 0.95 – 0.91 (m, 1H), 0.90

(d,  $J = 7.0$  Hz, 3H), 0.88 (d,  $J = 6.9$  Hz, 3H), 0.68 (td,  $J = 8.9, 6.1$  Hz, 1H), 0.16 (s, 3H), 0.04 (s, 3H).

$^{13}\text{C}$  NMR (151 MHz, Chloroform- $d$ )  $\delta$  205.6, 169.0, 138.4, 124.2, 74.5, 73.8, 71.5, 51.0, 50.9, 49.2, 37.9, 36.9, 29.6, 28.1, 25.6, 23.7, 23.2, 22.8, 20.3, 17.8, 16.4, 15.6, 15.3, 15.2, -4.2, -5.2.

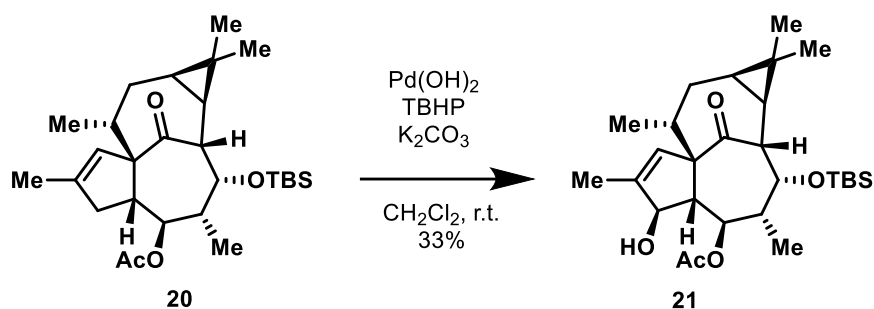

**Synthesis of **21**:** To a solution of **20** (282.7 mg, 0.60 mmol, 1.0 equiv) in  $\text{CH}_2\text{Cl}_2$  (8 mL) was added 20%  $\text{Pd(OH)}_2$  on carbon (15.9 mg, 0.03 mmol, 0.05 equiv) and  $\text{K}_2\text{CO}_3$  (20.7 mg, 0.15 mmol, 0.25 equiv) at room temperature. The mixture was cooled to 0 °C, and TBHP (5.5 M in decane, 0.54 mL, 3.0 mmol, 5.0 equiv) was added with vigorous stirring. Then, the reaction mixture was allowed to warm to room temperature. After stirring for 24 h, the reaction mixture was filtered through a plug of silica gel (washed with  $\text{CH}_2\text{Cl}_2$ ). The solvent was removed under reduced pressure. Purification of the crude product by flash column chromatography (silica gel, hexanes/EtOAc = 3:1) afforded **21** (95 mg, 33%) as a colorless crystalline solid.

**Physical state:** colorless crystalline solid

$R_f = 0.1$  (Hex/EtOAc = 3:1; anisaldehyde)

**HRMS** ( $m/z$ ): calcd for  $\text{C}_{28}\text{H}_{46}\text{NaO}_5\text{Si}$ ,  $[\text{M}+\text{Na}]^+$ , 513.3012; found, 513.3018

$[\alpha]_D^{25} = +32.9^\circ$  ( $c = 0.14$ ,  $\text{CH}_2\text{Cl}_2$ )

$^1\text{H}$  NMR (600 MHz, Chloroform- $d$ )  $\delta$  5.89 (s, 1H), 4.71 (brs, 1H), 4.21 (s, 1H), 3.91 (d,  $J = 3.9$  Hz, 1H), 2.69 (d,  $J = 11.7$  Hz, 1H), 2.38 (s, 1H), 2.25 – 2.12 (m, 2H), 2.08 (s, 3H), 1.82 (dt,  $J = 15.8, 6.1$  Hz, 1H), 1.79 – 1.73 (m, 1H), 1.76 (d,  $J = 1.1$  Hz, 3H),

1.13 (s, 3H), 1.04 (s, 3H), 0.95 – 0.91 (m, 1H), 0.933 (s, 9H), 0.926 (d,  $J = 5.4$  Hz, 3H), 0.86 (d,  $J = 7.1$  Hz, 3H), 0.72 – 0.66 (m, 1H), 0.14 (s, 3H), 0.04 (s, 3H).

$^{13}\text{C}$  NMR (151 MHz, Chloroform- $d$ )  $\delta$  205.5, 169.3, 139.8, 129.7, 82.1, 75.8, 72.4, 70.9, 59.7, 50.4, 47.8, 42.5, 29.9, 28.1, 25.5, 23.5, 22.9, 22.8, 20.4, 17.8, 15.7, 15.0, 14.5, 14.0, -4.4, -5.2.

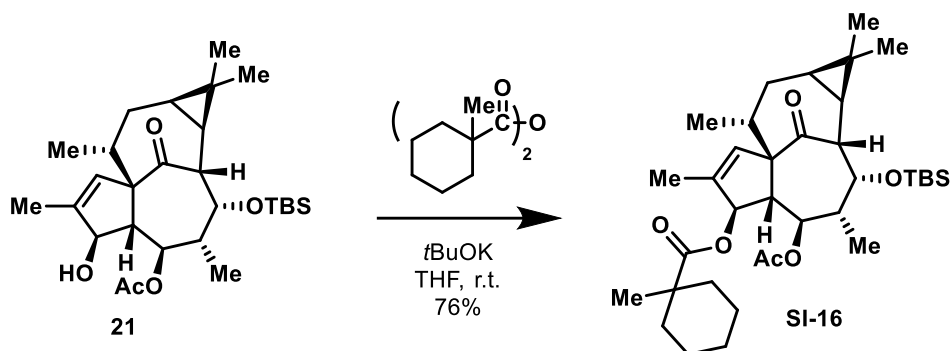

**Synthesis of SI-16:** Compound **21** (10.2 mg, 0.0208 mmol, 1.0 equiv) and 1-methylcyclohexane-1-carboxylic anhydride (55.4 mg, 0.208 mmol, 10.0 equiv) was dissolved in THF (2 mL). To this stirring solution was slowly added *t*-BuOK (11.7 mg, 0.104 mmol, 5.0 equiv) at room temperature. The reaction mixture was stirred at room temperature for 2 min and quenched by the slow addition of H<sub>2</sub>O (2 mL). The mixture was extracted with EtOAc (3  $\times$  3 mL) and the combined organic layers were dried over MgSO<sub>4</sub>, filtered and concentrated under reduced pressure. Purification of the crude product by flash column chromatography (silica gel, hexanes/EtOAc = 20:1) afforded **SI-16** (9.7 mg, 76%) as a colorless oil.

**Physical state:** colorless oil

$R_f$  = 0.17 (Hex/EtOAc = 20:1; anisaldehyde)

**HRMS** ( $m/z$ ): calcd for C<sub>36</sub>H<sub>58</sub>NaO<sub>6</sub>Si, [M+Na]<sup>+</sup>, 637.3900; found, 637.3893

$[\alpha]_D^{25}$  = +100.0° ( $c$  = 0.17, CH<sub>2</sub>Cl<sub>2</sub>)

$^1\text{H}$  NMR (600 MHz, Chloroform- $d$ )  $\delta$  6.03 (s, 1H), 5.37 (s, 1H), 4.64 (brs, 1H), 3.87 (d,  $J = 4.1$  Hz, 1H), 2.58 (d,  $J = 11.9$  Hz, 1H), 2.36 (s, 1H), 2.26 – 2.18 (m, 1H), 2.17 – 2.07 (m, 1H), 2.13 (s, 3H), 2.03 – 1.95 (m, 2H), 1.81 (dt,  $J = 15.8, 6.0$  Hz, 1H), 1.70 – SI-38

1.63 (m, 1H), 1.66 (d,  $J = 1.2$  Hz, 3H), 1.59 – 1.50 (m, 2H), 1.40 – 1.17 (m, 6H), 1.13 (s, 3H), 1.10 (s, 3H), 1.04 (s, 3H), 0.96 – 0.92 (m, 1H), 0.94 (d,  $J = 7.2$  Hz, 3H), 0.93 (s, 9H), 0.89 (d,  $J = 6.9$  Hz, 3H), 0.68 (td,  $J = 8.5, 6.4$  Hz, 1H), 0.15 (s, 3H), 0.04 (s, 3H).

**$^{13}\text{C}$  NMR** (151 MHz, Chloroform- $d$ )  $\delta$  205.2, 177.3, 170.0, 137.6, 132.8, 82.1, 74.3, 73.1, 71.9, 57.4, 51.6, 49.6, 43.3, 41.9, 35.7, 30.2, 28.7, 26.7, 26.1, 25.8, 24.3, 23.6, 23.4, 20.9, 18.4, 16.1, 15.8, 15.7, 14.9, -3.6, -4.5.

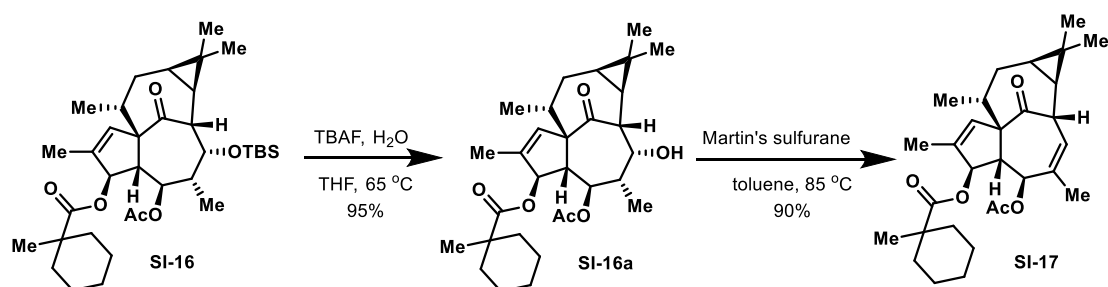

**Synthesis of **SI-17**:** To a solution of **SI-16** (6.6 mg, 0.0107 mmol, 1.0 equiv) in THF (1 mL) was added TBAF (1 M, 0.11 mL, 0.107 mmol, 10.0 equiv) and H<sub>2</sub>O (2  $\mu$ L, 0.107 mmol, 10.0 equiv) at room temperature. The flask was sealed with a plastic cap and the reaction mixture was heated to 65 °C. After stirring for 10 h, the reaction mixture was cooled to room temperature, then water (3 mL) was added. The mixture was extracted with Et<sub>2</sub>O (5  $\times$  3 mL) and the combined organic layers were dried over MgSO<sub>4</sub>, filtered and concentrated under reduced pressure. Purification of the crude product by flash column chromatography (silica gel, hexanes/EtOAc = 5:1) afforded **SI-16a** (5.1 mg, 95%).

To a solution of **SI-16a** (5.1 mg, 0.0102 mmol, 1.0 equiv) in toluene (2 mL) was added Martin's sulfurane (8.9 mg, 0.0132 mmol, 1.3 equiv) at room temperature. The solution was stirred at 85 °C for 10 min. Toluene was then removed under reduced pressure. Purification of the crude product by flash column chromatography (silica gel, hexanes/EtOAc = 20:1) afforded **SI-17** (4.4 mg, 90%).

**Physical state:** colorless oil

$R_f = 0.3$  (Hex/EtOAc = 10:1; anisaldehyde)

SI-39

**HRMS** ( $m/z$ ): calcd for  $C_{30}H_{42}NaO_5$ ,  $[M+Na]^+$ , 505.2930; found, 505.2932

$[\alpha]_D = -21.9^\circ$  ( $c = 0.27$ ,  $CH_2Cl_2$ )

**$^1H$  NMR** (600 MHz, Chloroform- $d$ )  $\delta$  6.01 (s, 1H), 5.80 (d,  $J = 5.7$  Hz, 1H), 5.24 (s, 1H), 4.86 (brs, 1H), 3.73 (dd,  $J = 11.4, 5.2$  Hz, 1H), 2.82 (s, 1H), 2.32 – 2.24 (m, 1H), 2.18 (s, 3H), 2.00 (d,  $J = 12.7$  Hz, 2H), 1.83 (dt,  $J = 15.8, 5.9$  Hz, 1H), 1.77 – 1.71 (m, 1H), 1.74 (s, 3H), 1.62 (s, 3H), 1.60 – 1.50 (m, 2H), 1.39 – 1.16 (m, 6H), 1.141 (s, 3H), 1.138 (s, 3H), 1.05 (s, 3H), 0.99 (d,  $J = 7.0$  Hz, 3H), 0.94 (dd,  $J = 11.8, 8.5$  Hz, 1H), 0.70 (td,  $J = 8.4, 6.6$  Hz, 1H).

**$^{13}C$  NMR** (151 MHz, Chloroform- $d$ )  $\delta$  206.0, 177.1, 171.0, 138.7, 136.2, 131.0, 125.5, 81.6, 71.8, 55.9, 44.7, 43.4, 41.5, 35.7, 30.4, 28.7, 26.7, 25.8, 23.8, 23.5, 23.4, 22.8, 21.7, 21.3, 15.7, 15.5, 15.1.

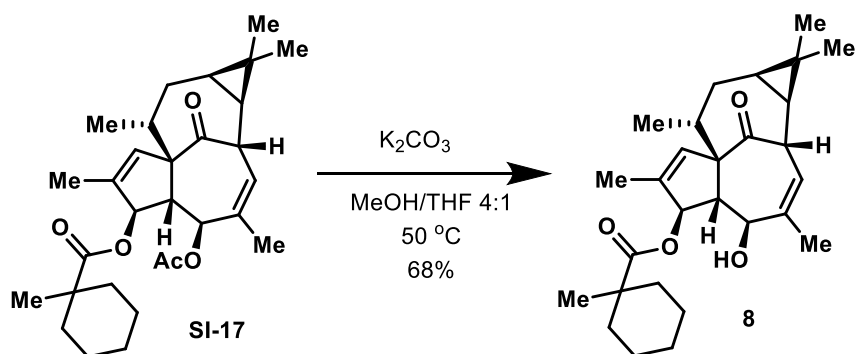

**Synthesis of 8:** To a solution of **SI-17** (4.2 mg, 0.0087 mmol, 1.0 equiv) in MeOH (0.8 mL) and THF (0.2 mL) was added  $K_2CO_3$  (6.0 mg, 0.0435 mmol, 5.0 equiv) at room temperature. The reaction mixture was stirred for 2 h at  $50^\circ C$  before quenching with saturated  $NH_4Cl_{(aq)}$  (2 mL). The mixture was extracted with  $Et_2O$  ( $5 \times 3$  mL) and the combined organic layers were dried over  $MgSO_4$ , filtered and concentrated under reduced pressure. Purification of the crude product by flash column chromatography (silica gel, hexanes/ $EtOAc = 5:1$ ) afforded **8** (2.6 mg, 68%) as a white foam.

**Physical state:** white foam

$R_f = 0.25$  (Hex/ $EtOAc = 7:1$ ; anisaldehyde)

**HRMS** ( $m/z$ ): calcd for  $C_{28}H_{40}NaO_4$ ,  $[M+Na]^+$ , 463.2824; found, 463.2825

SI-40

$[\alpha]_D = +10.0^\circ$  ( $c = 0.21$ ,  $\text{CH}_2\text{Cl}_2$ )

**$^1\text{H}$  NMR** (600 MHz,  $\text{CHCl}_3$ - $d$ )  $\delta$  6.12 (s, 1H), 5.67 (d,  $J = 5.3$  Hz, 1H), 5.20 (s, 1H), 3.83 (s, 1H), 3.72 (d,  $J = 9.9$  Hz, 1H), 3.49 (dd,  $J = 11.6, 4.7$  Hz, 1H), 2.52 (d,  $J = 10.0$  Hz, 1H), 2.09 (ddd,  $J = 7.1, 4.6, 2.8$  Hz, 1H), 2.06 – 1.97 (m, 2H), 1.84 – 1.80 (m, 1H), 1.80 (d,  $J = 1.1$  Hz, 3H), 1.77 (s, 3H), 1.66 (ddd,  $J = 15.6, 9.0, 2.4$  Hz, 1H), 1.60–1.51 (m, 2H), 1.42 – 1.20 (m, 6H), 1.16 (s, 3H), 1.08 (s, 3H), 1.04 (s, 3H), 1.00 (d,  $J = 7.0$  Hz, 3H), 0.89 (dd,  $J = 11.9, 8.4$  Hz, 1H), 0.69 (td,  $J = 8.7, 6.4$  Hz, 1H).

**$^{13}\text{C}$  NMR** (151 MHz,  $\text{CHCl}_3$ - $d$ )  $\delta$  205.7, 179.6, 139.4, 137.2, 132.6, 122.1, 85.6, 76.0, 72.2, 59.0, 44.9, 43.5, 42.8, 35.6, 35.5, 30.2, 28.7, 25.8, 23.7, 23.42, 23.36, 23.1, 22.7, 21.8, 15.9, 15.6, 15.2.

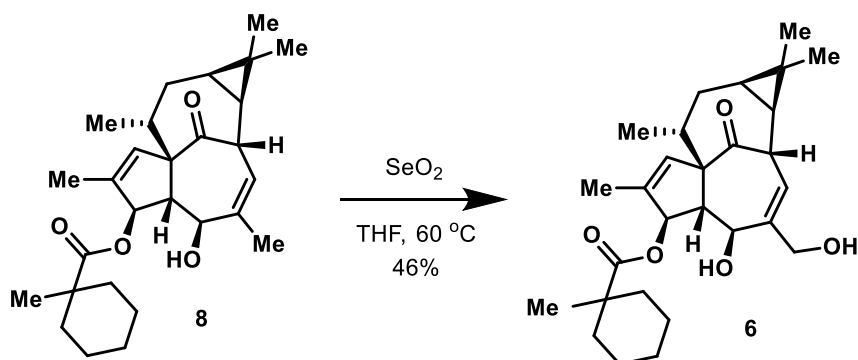

**Synthesis of **6**:** To a solution of **8** (2.5 mg, 0.0057 mmol, 1.0 equiv) in THF (1 mL) was added  $\text{SeO}_2$  (1.9 mg, 0.0171 mmol, 3.0 equiv) at room temperature. The flask was sealed with a plastic cap and the suspension was stirred at  $60^\circ\text{C}$  for 1 h. The mixture was cooled to room temperature, then  $\text{H}_2\text{O}$  (2 mL) was added. The mixture was extracted with  $\text{Et}_2\text{O}$  ( $5 \times 3$  mL) and the combined organic layers were dried over  $\text{MgSO}_4$ , filtered and concentrated under reduced pressure. Purification of the crude product by flash column chromatography (silica gel, hexanes/ $\text{EtOAc} = 2:1$ ) afforded **6** (1.2 mg, 46%) as a white foam.

**Physical state:** white foam

$R_f = 0.15$  (Hex/ $\text{EtOAc} = 2:1$ ; anisaldehyde)

**HRMS** ( $m/z$ ): calcd for  $\text{C}_{28}\text{H}_{40}\text{NaO}_5$ ,  $[\text{M}+\text{Na}]^+$ , 479.2773; found, 479.2767

$[\alpha]_D^{25} = +8.0^\circ$  ( $c = 0.1$ ,  $\text{CH}_2\text{Cl}_2$ )

**$^1\text{H}$  NMR** (600 MHz, Chloroform- $d$ )  $\delta$  6.09 (d,  $J = 1.2$  Hz, 1H), 5.98 (d,  $J = 4.5$  Hz, 1H), 5.21 (s, 1H), 4.13 (d,  $J = 12.2$  Hz, 1H), 4.05 (d,  $J = 12.3$  Hz, 1H), 4.04 (d,  $J = 10.8$  Hz, 1H), 3.55 (dd,  $J = 11.9, 5.1$  Hz, 1H), 2.55 (d,  $J = 10.2$  Hz, 1H), 2.14 – 2.07 (m, 1H), 2.07 – 1.96 (m, 2H), 1.84 (dt,  $J = 15.8, 5.9$  Hz, 1H), 1.81 (d,  $J = 1.3$  Hz, 3H), 1.69 (ddd,  $J = 15.9, 8.5, 2.4$  Hz, 1H), 1.64–1.49 (m, 2H), 1.41 – 1.22 (m, 6H), 1.17 (s, 3H), 1.10 (s, 3H), 1.05 (s, 3H), 1.00 (d,  $J = 7.0$  Hz, 3H), 0.94 (dd,  $J = 11.9, 8.4$  Hz, 1H), 0.72 (td,  $J = 8.5, 6.3$  Hz, 1H).

**$^{13}\text{C}$  NMR** (151 MHz, Chloroform- $d$ )  $\delta$  205.5, 180.0, 141.6, 137.3, 132.3, 125.9, 85.3, 75.6, 72.2, 67.2, 58.7, 45.0, 43.6, 42.8, 35.53, 35.50, 30.4, 28.7, 25.7, 23.7, 23.4, 22.6, 16.2, 15.7, 15.1.

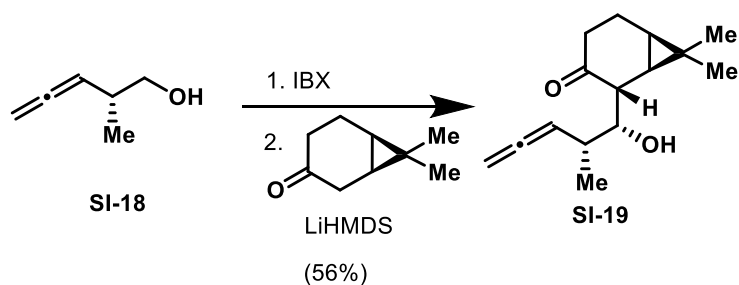

**Synthesis of **SI-19**:** In a 3 L round-bottomed flask, **SI-18** (92 g, 941 mmol, 2.0 equiv) was dissolved in THF (1720 mL). IBX (395 g, 1411 mmol, 3.0 equiv) was added and the resulting suspension was stirred at 80 °C for 2 h. The mixture was then cooled to room temperature. After filtration, the filtered residue was washed with THF (573 mL). The filtrate (aldehyde in THF) was kept under argon atmosphere and dried over  $\text{Na}_2\text{SO}_4$  30 min prior to use for the aldol reaction.

In a another 3 L round-bottomed flask was placed ketone<sup>2</sup> (65 g, 471 mmol, 1.0 equiv) in THF (143 mL) under argon and the solution was cooled to –78 °C. LiHMDS (1M in THF, 847 mL, 847 mmol, 1.8 equiv) was added dropwise under argon at –78 °C and the solution was stirred at –78 °C for 1 h. The aforementioned solution of aldehyde in THF was added dropwise over 50 min under argon at –78 °C. The mixture was stirred at –78 °C for 2 h then quenched by the addition of saturated aqueous  $\text{NH}_4\text{Cl}$ . The aqueous layer was separated and the aqueous layer was extracted with ethyl acetate. The combined organic fractions were dried with sodium sulfate, and concentrated under vacuum at 45 °C. Purification of the crude product by flash column chromatography afforded **SI-19** (68 g, 56%) as a colorless oil.

**Physical state:** colorless oil

**R<sub>f</sub>** = 0.26 (Hex/EtOAc = 9:1; anisaldehyde)

**HRMS** (*m/z*): calc. for C<sub>15</sub>H<sub>23</sub>O<sub>2</sub> [M+H]<sup>+</sup> = 235.1698; found, 235.1697

**[α]<sub>D</sub>** = +207.6° (*c* = 1.40, CH<sub>2</sub>Cl<sub>2</sub>)

**<sup>1</sup>H NMR** (600 MHz, CDCl<sub>3</sub>) δ 5.24 (p, *J* = 6.9 Hz, 1H), 4.69 (dt, *J* = 6.4, 3.0 Hz, 2H), 3.96-3.91 (m, 2H), 2.40-2.09 (m, 3H), 1.96 (t, *J* = 8.4 Hz, 1H), 1.85 (ddd, *J* = 14.9, 7.7, 2.2 Hz, 1H), 1.66-1.61 (m, 1H), 1.21 (d, *J* = 7.4 Hz, 3H), 1.15 (s, 3H), 1.11 (s, 3H), 0.92 (td, *J* = 9.1, 7.7 Hz, 1H), 0.41 (t, *J* = 8.3 Hz, 1H).

**<sup>13</sup>C NMR** (151 MHz, CDCl<sub>3</sub>) δ 219.9, 209.1, 86.5, 74.7, 71.8, 50.2, 41.3, 32.9, 27.9, 25.5, 23.3, 20.7, 19.7, 17.4, 14.9.

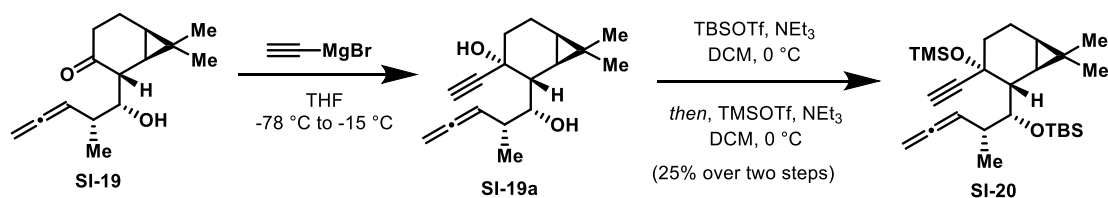

**Synthesis of SI-20:** In a 4 L round-bottomed flask, ethynylmagnesium bromide (0.5M in THF, 2321 mL, 1161 mmol, 4.0 equiv) was cooled to  $-78\text{ }^{\circ}\text{C}$ . Compound **SI-19** (68 g, 290 mmol, 1.0 equiv) in THF (288 mL) was added over 35 min at  $-78\text{ }^{\circ}\text{C}$ . The reaction mixture was stirred at this temperature for 10 min before warming to  $-15\text{ }^{\circ}\text{C}$ . After stirring for 4 h at  $-15\text{ }^{\circ}\text{C}$ , the reaction mixture was quenched by saturated aqueous  $\text{NH}_4\text{Cl}$ . The THF layer was then separated and distilled completely. The aqueous layer was extracted with EtOAc and the combined organic layers were filtered through silica gel and dried over  $\text{Na}_2\text{SO}_4$ , then the solution was concentrated under vacuum to provide crude **SI-19a** (77 g).

To a solution of crude **SI-19a** in  $\text{CH}_2\text{Cl}_2$  (568 mL) was added distilled triethylamine (165 mL, 1183 mmol, 4.0 equiv). Then, TBSOTf (136 mL, 591 mmol, 2.0 equiv) was added dropwise at  $0\text{ }^{\circ}\text{C}$ . After 1.5 h, distilled triethylamine (165 mL, 1183 mmol, 4.0 equiv) and TMSOTf (108 mL, 591 mmol, 2.0 equiv) were added dropwise at  $0\text{ }^{\circ}\text{C}$ . The reaction mixture was stirred for a further 1.5 h. Then, the reaction was quenched by saturated aqueous  $\text{NaHCO}_3$  (500 mL) and diluted with  $\text{CH}_2\text{Cl}_2$  (500 mL). After separating the aqueous layer, the organic layer was washed again with saturated

aqueous NaHCO<sub>3</sub> (500 mL) and then with water (3 × 500 mL) (to remove triethylamine). All aqueous layers were extracted with ethyl acetate (3 × 700 mL). The combined organic layers were dried over Na<sub>2</sub>SO<sub>4</sub>, filtered and concentrated under reduced pressure. Purification of the crude product by flash column chromatography afforded **SI-20** (33 g, 25%) as a colorless oil.

Spectroscopic data for **SI-19a**:

**Physical state**: colorless oil

**R<sub>f</sub>** = 0.19 (Hex/EtOAc = 4:1; anisaldehyde)

**HRMS (m/z)**: calc. for C<sub>17</sub>H<sub>25</sub>O<sub>2</sub> [M+H]<sup>+</sup> = 261.1855; found, 261.1856

**[α]<sub>D</sub>** = −27.8° (*c* = 0.80, CH<sub>2</sub>Cl<sub>2</sub>)

**<sup>1</sup>H NMR** (600 MHz, CDCl<sub>3</sub>) δ 5.54 – 5.02 (m, 1H), 4.73 (dt, *J* = 6.3, 2.9 Hz, 2H), 4.16–4.13 (m, 1H), 3.09 (s, 1H), 2.68 (s, 1H), 2.64–2.51 (m, 3H), 1.70 (dd, *J* = 14.9, 7.0 Hz, 1H), 1.59 – 1.47 (m, 2H), 1.35–1.28 (m, 1H), 1.08 (d, *J* = 6.6 Hz, 3H), 1.06 (s, 3H), 0.96 (s, 3H), 0.73 (t, *J* = 8.8 Hz, 1H), 0.38 (dd, *J* = 9.4, 5.2 Hz, 1H).

**<sup>13</sup>C NMR** (151 MHz, CDCl<sub>3</sub>) δ 209.3, 87.6, 86.6, 76.1, 75.1, 74.8, 67.0, 46.2, 38.9, 34.8, 28.8, 24.2, 21.6, 19.9, 17.6, 16.8, 15.4.

Spectroscopic data for **SI-20**:

**Physical state**: colorless oil

**R<sub>f</sub>** = 0.66 (Hex; anisaldehyde)

**HRMS (m/z)**: calc. for C<sub>26</sub>H<sub>46</sub>NaO<sub>2</sub>Si<sub>2</sub> [M+Na]<sup>+</sup> = 469.2934; found, 469.2943

**[α]<sub>D</sub>** = +25.8° (*c* = 0.58, CH<sub>2</sub>Cl<sub>2</sub>)

**<sup>1</sup>H NMR** (600 MHz, CDCl<sub>3</sub>) δ 5.49 (q, *J* = 7.0 Hz, 1H), 4.60–4.58 (m, 2H), 4.36 (dd, *J* = 4.0, 1.4 Hz, 1H), 3.04–3.00 (m, 1H), 2.51 (s, 1H), 1.88 – 1.79 (m, 2H), 1.50 – 1.42 (m, 1H), 1.38 (dd, *J* = 5.6, 3.8 Hz, 1H), 1.33 – 1.23 (m, 1H), 1.15 – 1.08 (m, 4H), 1.00 (s, 3H), 0.92 (s, 9H), 0.88 (s, 3H), 0.60 – 0.49 (m, 1H), 0.18 (s, 9H), 0.07 (s, 3H), 0.04 (s, 3H).

**<sup>13</sup>C NMR** (151 MHz, CDCl<sub>3</sub>) δ 208.4, 93.5, 88.1, 76.4, 74.1, 73.5, 68.4, 49.2, 38.6, 35.6, 29.1, 26.0, 21.2, 18.5, 18.1, 18.1, 16.8, 15.8, 15.0, 1.7, −3.8, −4.6.

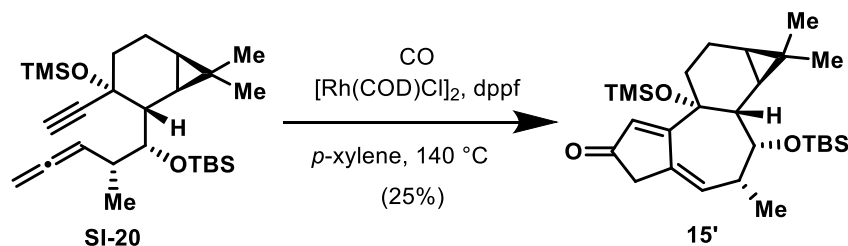

**Synthesis of **15'**:** A solution of **SI-20** (20 g, 44.8 mmol, 1.0 equiv) in anhydrous *p*-xylene (4454 mL) was degassed using carbon monoxide for 5 h. 1,5-cyclooctadienerrhodium(I) chloride dimer (2.208 g, 4.48 mmol, 0.1 equiv) and dppf (4.89 g, 8.95 mmol, 0.2 equiv) were added. The reaction mixture was transferred into a preheated oil bath and stirred at 140 °C under 1 atm of CO for 18 h. The reaction mixture was cooled to room temperature and concentrated under reduced pressure. Purification of the crude product by flash column chromatography afforded **15'** (5.3 g, 25%) as a yellow solid.

**Physical state:** yellow solid (m.p. 101-104 °C)

**R<sub>f</sub>** = 0.38 (Hex/EtOAc = 10:1; anisaldehyde)

**HRMS** (*m/z*): calc. for C<sub>27</sub>H<sub>47</sub>O<sub>3</sub>Si<sub>2</sub> [*M*+H]<sup>+</sup> = 475.3064; found, 475.3065

[α]<sub>D</sub><sup>20</sup> = −118.6° (*c* = 0.86, CH<sub>2</sub>Cl<sub>2</sub>)

**<sup>1</sup>H NMR** (600 MHz, CDCl<sub>3</sub>) δ 6.06 (d, *J* = 1.6 Hz, 1H), 5.88 (d, *J* = 8.8 Hz, 1H), 4.12 (dd, *J* = 8.3, 3.1 Hz, 1H), 3.17 – 2.95 (ABq, *J* = 19.9, 2H), 2.59-2.53 (m, 1H), 2.08 – 1.84 (m, 2H), 1.71 – 1.53 (m, 2H), 1.42 (d, *J* = 7.4 Hz, 3H), 1.35 – 1.20 (m, 2H), 1.08 (s, 3H), 0.91 (s, 9H), 0.86 (s, 3H), 0.66 (td, *J* = 9.1, 1.5 Hz, 1H) 0.01 (s, 15H).

**<sup>13</sup>C NMR** (151 MHz, CDCl<sub>3</sub>) δ 205.3, 176.9, 134.8, 133.3, 129.9, 73.5, 73.3, 48.2, 45.0, 43.8, 35.7, 28.4, 25.9, 22.6, 18.5, 17.9, 17.7, 16.4, 15.3, 12.6, 2.0, −4.2, −5.1.

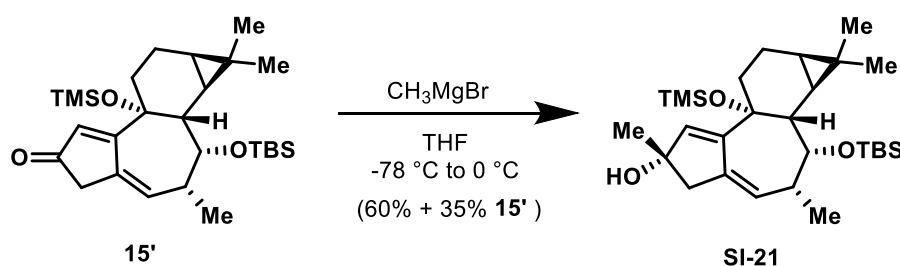

Synthesis of **SI-21**: To a solution of **15'** (602 mg, 1.27 mmol, 1.0 equiv) in THF (64 mL, 0.02 M) was added methylmagnesium bromide (3.0 M in Et<sub>2</sub>O, 2.5 mL, 7.62 mmol, 6.0 equiv) over 5 min at −78 °C. The reaction mixture was stirred at this temperature for 5 min before warming to 0 °C. After 15 min, the reaction mixture was cooled to −78 °C and carefully quenched by NH<sub>4</sub>Cl<sub>(aq)</sub> (30 mL). The mixture was extracted with EtOAc (3 × 50 mL) and the combined organic layers were dried over Na<sub>2</sub>SO<sub>4</sub>, filtered and concentrated under reduced pressure. Purification of the crude product by flash column chromatography (silica gel, hexanes/EtOAc = 20:1→4:1) afforded **SI-21** (373 mg, 60%) as a colorless foam and recovered **15'** (212 mg, 35%).

**Physical state**: colorless foam

**R<sub>f</sub>** = 0.50 (Hex/EtOAc = 4:1; anisaldehyde)

**HRMS** (*m/z*): calc. for C<sub>28</sub>H<sub>51</sub>O<sub>3</sub>Si<sub>2</sub> [M+H]<sup>+</sup> = 461.2718; found, 461.2722

[α]<sub>D</sub> = −131.3° (*c* = 0.75, CH<sub>2</sub>Cl<sub>2</sub>)

**<sup>1</sup>H NMR** (600 MHz, CDCl<sub>3</sub>) δ 5.67 (s, 1H), 5.47 (d, *J* = 8.4 Hz, 1H), 4.06 (dd, *J* = 8.4, 3.0 Hz, 1H), 2.64 (ABq, *J* = 14.4 Hz, 2H), 2.42 – 2.37 (m, 1H), 1.95 (dt, *J* = 14.9, 9.7 Hz, 1H), 1.82 (dd, *J* = 13.5, 9.7 Hz, 1H), 1.57 (dd, *J* = 14.9, 8.7 Hz, 1H), 1.42 (t, *J* = 8.0 Hz, 1H), 1.36 – 1.29 (m, 6H), 1.25 – 0.96 (m, 5H), 0.90 (s, 9H), 0.83 (s, 3H), 0.60 (t, *J* = 8.4 Hz, 1H), 0.05 (s, 9H), −0.01 (s, 6H).

**<sup>13</sup>C NMR** (151 MHz, CDCl<sub>3</sub>) δ 149.7, 139.3, 137.0, 125.3, 79.8, 73.9, 72.8, 52.2, 49.1, 44.0, 35.3, 28.5, 26.7, 25.9, 22.7, 18.7, 18.0, 17.5, 16.5, 15.4, 12.6, 2.3, −4.3, −5.1.

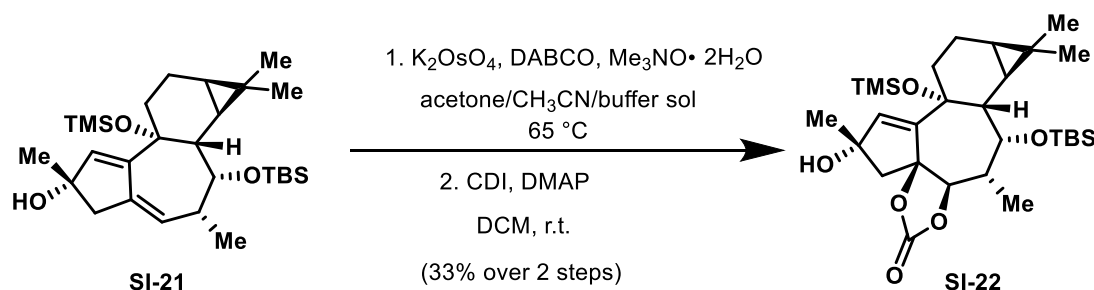

Synthesis of **SI-22**: A 100 mL round-bottomed flask was charged with **SI-21** (246 mg, 0.5 mmol, 1.0 equiv), Me<sub>3</sub>NO·2H<sub>2</sub>O (556 mg, 5.0 mmol, 10 equiv) and DABCO (305

mg, 5 mmol, 2.5 equiv) in acetone/CH<sub>3</sub>CN/\*0.5 M buffer solution (10.0 mL, 0.05 M, 4:3:3). Then, K<sub>2</sub>OsO<sub>4</sub>·H<sub>2</sub>O (18.4 mg, 0.05 mmol, 0.1 equiv) was added and the flask was sealed with a plastic cap and stirred vigorously at 65 °C. After 12 h, another portion of K<sub>2</sub>OsO<sub>4</sub>·H<sub>2</sub>O (18.4 mg, 0.05 mmol, 0.1 equiv) was added and stirred for 8 h before quenching with the addition of saturated aqueous Na<sub>2</sub>SO<sub>3</sub> (10 mL). The reaction mixture was extracted with ether (3 × 20 mL). The combined organic layers were washed with brine and dried over Na<sub>2</sub>SO<sub>4</sub>, filtered and concentrated *in vacuo* to afford crude diol.

[\*0.5 M buffer solution: pH=3, Na<sub>2</sub>HPO<sub>4</sub> (280 mg) and citric acid (840 mg) was dissolved in H<sub>2</sub>O (10 mL).]

The crude diol was dissolved in CH<sub>2</sub>Cl<sub>2</sub> (10.0 mL, 0.05 M). *N,N*-Carbonyldiimidazole (305 mg, 2.5 mmol, 5.0 equiv) and DMAP (6.1 mg, 0.05 mmol, 0.1 equiv) were then added. The solution was stirred at room temperature for 7 h before quenching with water (20 mL). The aqueous layer was separated, then extracted further with hexane (2 × 30 mL). The combined organic layers were dried over Na<sub>2</sub>SO<sub>4</sub>, filtered and concentrated *in vacuo*. Purification of the crude product by flash column chromatography (silica gel, hexanes/EtOAc = 20:1→15:1→9:1) afforded desired product **SI-22** (91 mg, 33% over 2 steps) as a colorless oil.

**Physical state:** colorless oil

**R<sub>f</sub>** = 0.32 (Hex/EtOAc = 7:3; anisaldehyde)

**HRMS (m/z):** calc. for C<sub>29</sub>H<sub>50</sub>NaO<sub>6</sub>Si<sub>2</sub> [M+Na]<sup>+</sup> = 573.3038; found, 573.3041

**[α]<sub>D</sub>** = +2.5° (*c* = 0.52, CH<sub>2</sub>Cl<sub>2</sub>)

**<sup>1</sup>H NMR** (600 MHz, CDCl<sub>3</sub>) δ 5.97 (s, 1H), 4.76 (d, *J* = 5.1 Hz, 1H), 4.23 (dd, *J* = 7.6, 4.8 Hz, 1H), 2.81-2.75 (m, 1H), 2.56 (d, *J* = 14.5 Hz, 1H), 2.33 (d, *J* = 14.5 Hz, 1H), 1.94-1.87 (m, 1H), 1.67 – 1.47 (m, 2H), 1.45 (s, 3H), 1.32 (ddd, *J* = 15.2, 10.8, 8.0 Hz, 1H), 1.24 – 1.20 (m, 1H), 1.15 (d, *J* = 7.7 Hz, 3H), 1.11 – 1.05 (m, 1H), 1.03 (s, 3H), 0.94 (s, 9H), 0.91 (s, 3H), 0.63 (t, *J* = 9.0 Hz, 1H), 0.21 (s, 9H), 0.07 (s, 3H), 0.06 (s, 3H).

**<sup>13</sup>C NMR** (151 MHz, CDCl<sub>3</sub>) δ 153.7, 151.6, 140.7, 93.7, 87.2, 78.3, 75.3, 72.0, 57.1, 41.2, 41.1, 38.2, 28.9, 28.7, 26.0, 19.6, 19.1, 18.3, 17.4, 15.8, 15.1, 11.7, 2.9, -4.1, -5.1.

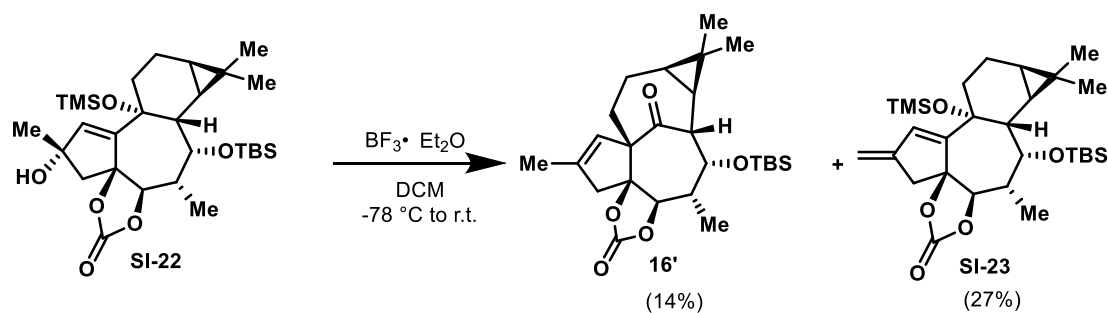

Synthesis of **16'** and **SI-23**: To a solution of **SI-22** (50 mg, 0.091 mmol, 1.0 equiv) in  $\text{CH}_2\text{Cl}_2$  (3.7 mL, 0.025 M) was added  $\text{BF}_3 \cdot \text{Et}_2\text{O}$  (112  $\mu\text{L}$ , 3.38 mmol, 10 equiv) dropwise at  $-78^\circ\text{C}$ . The reaction mixture was stirred at this temperature for 2 min before warming to room temperature. After stirring for 5 min, the reaction was cooled to  $-78^\circ\text{C}$  and a 1:1 mixture of  $\text{Et}_3\text{N}/\text{MeOH}$  (0.5 mL) was added. The reaction mixture was warmed to room temperature and concentrated under reduced pressure. Purification of the crude product by flash column chromatography (silica gel, hexanes/ $\text{EtOAc}$  = 30:1  $\rightarrow$  15:1) afforded **16'** (6.0 mg, 14%) and **SI-23** (12.9 mg, 27%).

Spectroscopic data for **16'**:

**Physical state**: colorless oil

$R_f$  = 0.53 (Hex/ $\text{EtOAc}$  = 4:1; anisaldehyde)

**HRMS** ( $m/z$ ): calc. for  $\text{C}_{26}\text{H}_{41}\text{O}_5\text{Si}$   $[\text{M}+\text{H}]^+ = 461.2718$ ; found, 461.2722

$[\alpha]_D^{25} = +39.6^\circ$  ( $c$  = 0.5;  $\text{CH}_2\text{Cl}_2$ )

**$^1\text{H}$  NMR** (600 MHz,  $\text{CDCl}_3$ )  $\delta$  5.44 (d,  $J$  = 1.7 Hz, 1H), 4.88 (d,  $J$  = 5.2 Hz, 1H), 4.20 (dd,  $J$  = 7.6, 3.8 Hz, 1H), 3.16 (d,  $J$  = 18.4 Hz, 1H), 2.88–2.82 (m, 1H), 2.62 (d,  $J$  = 18.2 Hz, 1H), 2.32 (dd,  $J$  = 11.4, 3.8 Hz, 1H), 2.20 – 1.99 (m, 2H), 1.71 (s, 3H), 1.56 – 1.43 (m, 2H), 1.10 (s, 3H), 1.04 (s, 3H), 1.00 – 0.92 (m, 10H) 0.85 (d,  $J$  = 8.0 Hz, 3H), 0.71 – 0.62 (m, 1H), 0.11 (s, 3H), 0.05 (s, 3H).

**$^{13}\text{C}$  NMR** (151 MHz,  $\text{CDCl}_3$ )  $\delta$  208.0, 153.2, 134.1, 127.2, 93.3, 91.4, 75.3, 67.4, 54.9, 49.2, 38.2, 36.6, 28.3, 25.7, 25.1, 24.9, 23.6, 23.3, 18.2, 16.2, 15.1, 9.5, -4.9, -4.9.

Spectroscopic data for **SI-23**:

**Physical state:** colorless foam

**R<sub>f</sub>** = 0.65 (Hex/EtOAc = 4:1; anisaldehyde)

**HRMS** (*m/z*): calc. for C<sub>29</sub>H<sub>49</sub>O<sub>5</sub>Si<sub>2</sub> [M+H]<sup>+</sup> = 533.3118; found, 533.3121

**[α]<sub>D</sub>** = +18.0° (*c* = 1.0, CH<sub>2</sub>Cl<sub>2</sub>)

**<sup>1</sup>H NMR** (600 MHz, CDCl<sub>3</sub>) δ 6.42 (s, 1H), 5.03 (s, 1H), 4.90 (s, 1H), 4.70 (d, *J* = 5.2 Hz, 1H), 4.24 (dd, *J* = 7.8, 4.8 Hz, 1H), 3.20 (dt, *J* = 17.0, 2.2 Hz, 1H), 2.81 (dt, *J* = 17.0, 1.7 Hz, 1H), 2.78 – 2.72 (m, 1H), 1.94 – 1.87 (m, 1H), 1.67 – 1.48 (m, 2H), 1.40 – 1.35 (m, 1H), 1.25 – 1.23 (m, 1H), 1.09 (dd, *J* = 9.7, 6.1 Hz, 1H), 1.04 (s, 3H), 0.98 (d, *J* = 7.6 Hz, 3H), 0.93 – 0.92 (m, 12H), 0.65 – 0.62 (m, 1H), 0.21 (s, 9H), 0.07 (s, 3H), 0.05 (s, 3H).

**<sup>13</sup>C NMR** (151 MHz, CDCl<sub>3</sub>) δ 155.9, 153.5, 144.9, 136.9, 106.9, 93.0, 87.7, 76.1, 72.0, 48.2, 41.1, 40.2, 37.6, 28.8, 26.0, 19.5, 19.1, 18.2, 17.4, 15.7, 15.2, 11.0, 2.8, -4.2, -5.1.

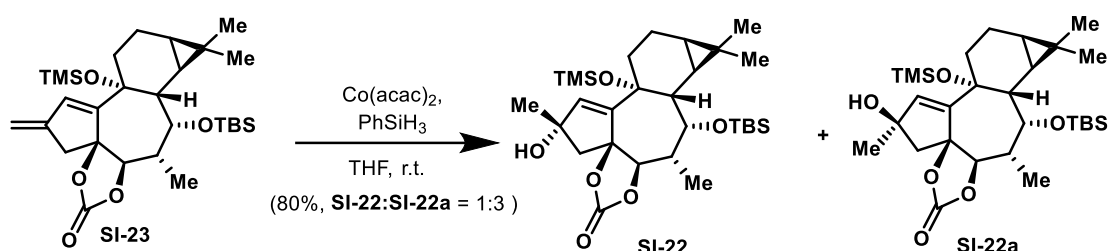

**Synthesis of **SI-22** and **SI-22a**:** To a solution of **SI-23** (87.5 mg, 0.16 mmol, 1 equiv) in THF (3.3 mL, 0.05 M) was added Co(acac)<sub>2</sub> (8.5 mg, 0.033 mmol, 0.2 equiv) and molecular sieves (4Å, 0.44 g, 5 wt equiv). PhSiH<sub>3</sub> (81 μL, 0.66 mmol, 4 equiv) was added slowly while bubbling O<sub>2</sub> through the stirred solution. Then, the reaction was stirred under O<sub>2</sub> atmosphere (no bubbling) at ambient temperature for 10 min. The suspension was then filtered through Celite® to remove the molecular sieves and the filtrate was concentrated under reduced pressure. Purification of the crude product by flash column chromatography (silica gel, hexanes/EtOAc = 20:1→15:1→9:1→1:1) afforded a mixture of **SI-22** and **SI-22a** as a colorless oil [72.3 mg, 80% (**SI-22**:**SI-22a** = 1:3, the ratio was determined by <sup>1</sup>H NMR spectroscopy)].

**Spectroscopic data for **SI-22a**:**

SI-49

**Physical state:** colorless oil

**R<sub>f</sub>** = 0.27 (Hex/EtOAc = 7:3; anisaldehyde)

**HRMS** (*m/z*): calc. for C<sub>29</sub>H<sub>50</sub>NaO<sub>6</sub>Si<sub>2</sub> [M+Na]<sup>+</sup> = 573.3038; found, 573.3041

[**α**]<sub>D</sub> = +1.5° (*c* = 0.39, CH<sub>2</sub>Cl<sub>2</sub>)

**<sup>1</sup>H NMR** (600 MHz, CDCl<sub>3</sub>) δ 6.07 (s, 1H), 4.67 (d, *J* = 5.3 Hz, 1H), 4.22 (dd, *J* = 7.6, 4.8 Hz, 1H), 2.78 – 2.72 (m, 1H), 2.63 (d, *J* = 15.1 Hz, 1H), 2.34 (d, *J* = 15.1 Hz, 1H), 1.97 – 1.85 (m, 1H), 1.73 – 1.52 (m, 2H), 1.43 (s, 3H), 1.36 (ddd, *J* = 15.1, 11.0, 8.0 Hz, 1H), 1.22 (t, *J* = 5.4 Hz, 1H), 1.11 – 1.01 (m, 7H), 0.93 (s, 9H), 0.91 (s, 3H), 0.63 (t, *J* = 7.8 Hz, 1H), 0.20 (s, 9H), 0.07 (s, 3H), 0.06 (s, 3H).

**<sup>13</sup>C NMR** (151 MHz, CDCl<sub>3</sub>) δ 153.4, 151.9, 141.6, 93.2, 86.6, 77.3, 75.2, 72.1, 57.8, 41.5, 41.1, 38.1, 28.9, 27.0, 26.0, 19.6, 19.0, 18.3, 17.4, 15.9, 15.1, 11.1, 2.9, -4.1, -5.1.

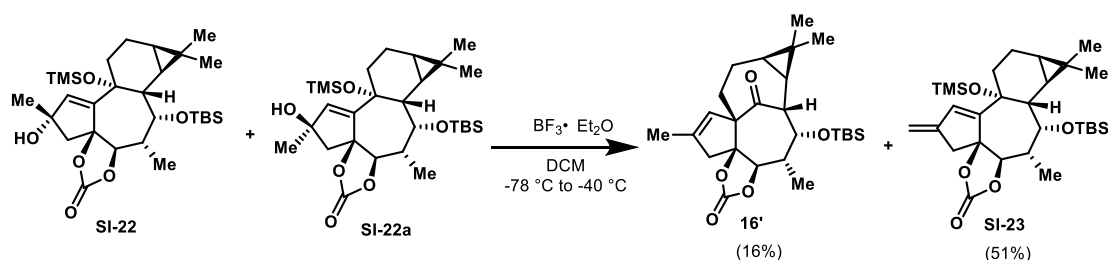

Synthesis of **16'** [synthesis via recovered **SI-22** and **SI-22a** (**SI-22** : **SI-22a** = 1:3)]: To a solution of a mixture of **SI-22** and **SI-22a** (54 mg, 0.098 mmol, 1.0 equiv) in CH<sub>2</sub>Cl<sub>2</sub> (3.9 mL, 0.025 M) was added BF<sub>3</sub>·Et<sub>2</sub>O (120 μL, 0.98 mmol, 10 equiv) dropwise at -78 °C. The reaction mixture was stirred at this temperature for 2 min before warming to -40 °C. After stirring for 5 min, the reaction was cooled to -78 °C and a 1:1 mixture of Et<sub>3</sub>N/MeOH (0.5 mL) was added. The reaction mixture was warmed to room temperature and concentrated under reduced pressure. Purification of the crude product by flash column chromatography (silica gel, hexanes/EtOAc = 30:1→15:1) afforded **16'** (12.1 mg, 16%) and **SI-23** (26.8 mg, 51%).

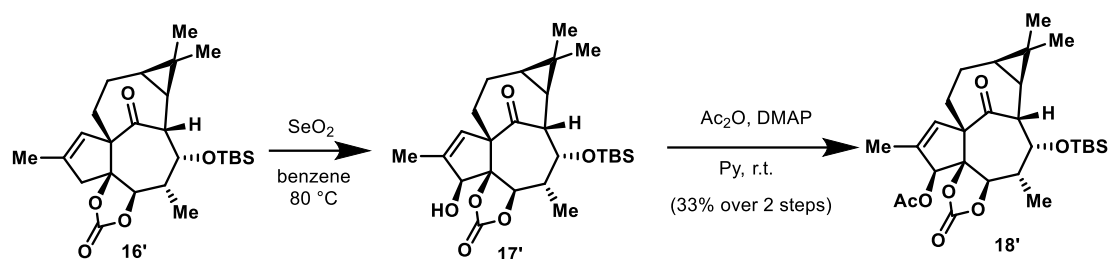

Synthesis of **17'**: To a solution of **16'** (45.4 mg, 0.099 mmol, 1.0 equiv) in benzene (5 mL, 0.02 M) was added  $\text{SeO}_2$  (55 mg, 0.49 mmol, 5.0 equiv). The flask was sealed with a plastic cap and the suspension was stirred at 80 °C for 21 h. The suspension was cooled to room temperature and was filtered through Celite<sup>®</sup>, washed with EtOAc, and then concentrated under reduced pressure. Purification of the crude product by flash column chromatography (silica gel, hexanes/EtOAc = 9:1→4:1) afforded alcohol **17'** (22.0 mg, 47%) as a colorless oil.

Synthesis of **18'**: To a solution of **17'** (20.7 mg, 0.043 mmol, 1.0 equiv) in pyridine (1.4 mL, 0.03 M) was added  $\text{Ac}_2\text{O}$  (20  $\mu\text{L}$ , 0.22 mmol, 5.0 equiv) and DMAP (20.7 mg, 4.3  $\mu\text{mol}$ , 1.0 equiv). After stirring for 10 min, the mixture was quenched by saturated aqueous  $\text{NaHCO}_3$  (2.0 mL) and then extracted with EtOAc (3  $\times$  2 mL). The combined organic layers were washed with brine (2 mL), dried over  $\text{Na}_2\text{SO}_4$ , filtered and concentrated under reduced pressure. Purification of the crude product by flash column chromatography (silica gel, hexanes/EtOAc = 15:1→9:1) afforded **18'** (15.6 mg, 70%) as a colorless oil.

Spectroscopic data for **17'**:

**Physical state**: colorless oil

$R_f$  = 0.43 (Hex/EtOAc = 7:3; anisaldehyde)

**HRMS** ( $m/z$ ): calc. for  $\text{C}_{26}\text{H}_{41}\text{O}_6\text{Si}$   $[\text{M}+\text{H}]^+ = 477.2667$ ; found, 477.2665

$[\alpha]_D^{25} = +92.2^\circ$  ( $c = 0.37$ ,  $\text{CH}_2\text{Cl}_2$ )

**$^1\text{H}$  NMR** (600 MHz,  $\text{CDCl}_3$ )  $\delta$  5.63 – 5.58 (m, 1H), 4.99 (d,  $J = 5.1$  Hz, 1H), 4.26 – 4.18 (m, 2H), 2.94–2.88 (m, 1H), 2.47 (dd,  $J = 11.4, 3.8$  Hz, 1H), 2.15–2.06 (m, 2H), 1.79 (s, 3H), 1.62 – 1.47 (m, 2H), 1.12 (s, 3H), 1.05 (s, 3H), 0.97–0.92 (s, 10H), 0.85 (d,  $J = 8.0$  Hz, 3H), 0.74 – 0.66 (m, 1H), 0.12 (s, 3H), 0.06 (s, 3H).

**<sup>13</sup>C NMR** (151 MHz, CDCl<sub>3</sub>) δ 207.1, 152.8, 137.9, 129.3, 90.8, 89.1, 86.3, 73.1, 67.3, 49.9, 38.2, 37.8, 28.2, 25.7, 25.0, 24.7, 23.2, 23.1, 18.2, 15.1, 13.8, 10.2, -4.9.

Spectroscopic data for **18'**

**Physical state:** colorless oil

**R<sub>f</sub>** = 0.54 (Hex/EtOAc = 4:1; anisaldehyde)

**HRMS** (*m/z*): calc. for C<sub>28</sub>H<sub>42</sub>O<sub>7</sub>Si [M+H]<sup>+</sup> = 519.2772; found, 519.2763

[α]<sub>D</sub> = +42.9° (*c* = 0.17, CH<sub>2</sub>Cl<sub>2</sub>)

**<sup>1</sup>H NMR** (600 MHz, CDCl<sub>3</sub>) δ 5.91 (s, 1H), 5.35 (d, *J* = 4.9 Hz, 1H), 5.16 (s, 1H), 4.21 (dd, *J* = 7.5, 3.9 Hz, 1H), 2.90-2.84 (m, 1H), 2.22 (dd, *J* = 11.4, 4.0 Hz, 1H), 2.18 (s, 3H), 2.10 – 1.99 (m, 2H), 1.75 (s, 3H), 1.57 – 1.52 (m, 2H), 1.08 (s, 3H), 1.04 (s, 3H), 0.97 (dd, *J* = 11.3, 8.6 Hz, 1H), 0.94 (s, 9H), 0.81 (d, *J* = 8.0 Hz, 3H), 0.71 – 0.62 (m, 1H), 0.11 (s, 3H), 0.06 (s, 3H).

**<sup>13</sup>C NMR** (151 MHz, CDCl<sub>3</sub>) δ 206.9, 172.3, 152.7, 133.4, 133.0, 90.8, 89.0, 88.9, 73.0, 67.1, 50.0, 38.7, 37.7, 28.2, 25.7, 25.2, 25.0, 23.4, 23.2, 20.5, 18.2, 15.1, 14.2, 9.6, -4.9.

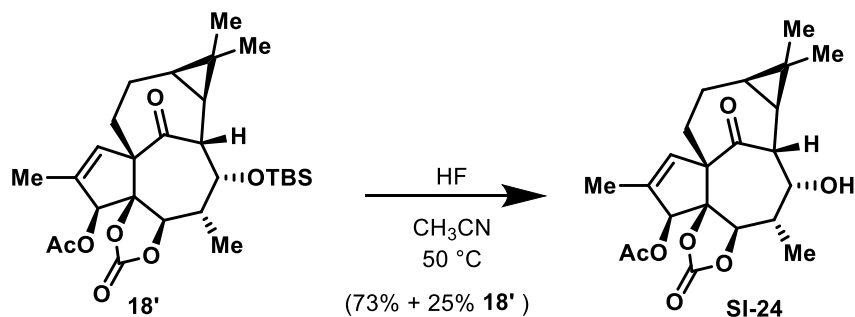

**Synthesis of SI-24:** A plastic Falcon<sup>®</sup> tube was charged with **18'** (16.6 mg, 0.032 mmol, 1.0 equiv) and CH<sub>3</sub>CN (0.64 mL, 0.05 M). 47% aqueous HF (70 μL, 1.92 mmol, 60 equiv) was added and the mixture was heated to 50 °C. After stirring for 16 h, the reaction was cooled to room temperature and quenched by the slow addition of saturated aqueous NaHCO<sub>3</sub> (4 mL). After dilution with EtOAc (5 mL), the organic layer was separated, then the aqueous layer was extracted with EtOAc (3 × 5 mL). The combined organic fractions were dried over Na<sub>2</sub>SO<sub>4</sub>, filtered, and concentrated *in vacuo*.

Purification of the crude product by flash column chromatography (silica gel, hex/EtOAc = 9:1→4:1→7:3) afforded recovered **18'** (4.1 mg, 25%) and **SI-24** (9.4 mg, 73%) as a colorless oil.

**Physical state:** colorless oil

$R_f$  = 0.32 (Hex/EtOAc = 3:2; anisaldehyde)

**HRMS** ( $m/z$ ): calc. for  $C_{22}H_{29}O_7$   $[M+H]^+$  = 405.1913; found, 405.1920

$[\alpha]_D^{25}$  = +18.8° ( $c$  = 0.51,  $CH_2Cl_2$ )

**$^1H$  NMR** (600 MHz,  $CDCl_3$ )  $\delta$  5.82 (s, 1H), 5.39 (d,  $J$  = 4.7 Hz, 1H), 5.15 (s, 1H), 4.18 (d,  $J$  = 8.2 Hz, 1H), 3.12 – 3.03 (m, 1H), 2.40 (dd,  $J$  = 11.3, 3.8 Hz, 1H), 2.18 (s, 3H), 2.16 – 2.01 (m, 2H), 1.77 (s, 3H), 1.65 – 1.51 (m, 2H), 1.09 (s, 3H), 1.06 (s, 3H), 0.95 (dd,  $J$  = 11.4, 8.5 Hz, 1H), 0.83 (d,  $J$  = 8.1 Hz, 3H), 0.74 – 0.70 (s, 1H).

**$^{13}C$  NMR** (151 MHz,  $CDCl_3$ )  $\delta$  210.7, 172.2, 152.4, 134.0, 132.3, 91.0, 89.0, 88.4, 72.3, 67.4, 48.7, 37.7, 37.0, 28.4, 25.3, 25.1, 23.0, 22.3, 20.4, 14.9, 14.2, 9.7.

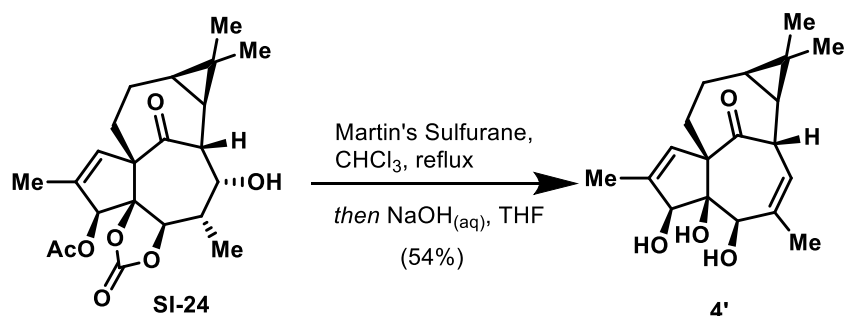

**Synthesis of **4'**:** To a solution of **SI-24** (19.1 mg, 0.047 mmol, 1.0 equiv) in  $CHCl_3$  (200  $\mu$ L) was added Martin's sulfurane (100 mg, 0.15 mmol, 3.2 equiv). The solution was heated to reflux for 1 h. Additional Martin's sulfurane (150 mg, 0.23 mmol, 4.8 equiv) was added portion-wise over 2 h until starting material was fully consumed. The  $CHCl_3$  was removed under reduced pressure, then THF (500  $\mu$ L) and 10% aqueous NaOH (500  $\mu$ L) were added. The mixture was stirred for 1 h. EtOAc was added and the layers were separated. The aqueous layer was extracted with EtOAc ( $5 \times 2$  mL). The combined organic fractions were dried over  $Na_2SO_4$ , filtered, and concentrated to provide crude

product. The crude material was purified by column chromatography (Hex/EtOAc = 10:1 → 5:1 → 2:1 → 1:1) to afford **4'** (7.1 mg, 54%) as a white solid.

**Physical state:** white solid (m.p. = 192-195 °C, decomp.)

$R_f$  = 0.38 (Hex/EtOAc = 1:1; anisaldehyde)

**HRMS** ( $m/z$ ): calc. for  $C_{19}H_{27}O_4$   $[M+H]^+$  = 319.1904; found, 319.1904

$[\alpha]_D^{25}$  = -10.0° ( $c$  = 0.2,  $CH_2Cl_2$ )

**$^1H$  NMR** (600 MHz,  $CDCl_3$ )  $\delta$  5.83 (d,  $J$  = 1.7 Hz, 1H), 5.77 (dt,  $J$  = 4.9, 1.6 Hz, 1H), 4.44 (d,  $J$  = 4.4 Hz, 1H), 4.09 (s, 1H), 4.04 – 4.00 (m, 1H), 3.47 (d,  $J$  = 10.2 Hz, 1H), 2.53 (d,  $J$  = 11.4 Hz, 1H), 2.18 – 1.87 (m, 4H), 1.83 (d,  $J$  = 1.5 Hz, 3H), 1.78 (s, 3H), 1.63 (ddd,  $J$  = 14.2, 12.7, 3.8 Hz, 1H), 1.11 (s, 3H), 1.05 (s, 3H), 0.93 (dd,  $J$  = 12.0, 8.3 Hz, 1H), 0.69 – 0.62 (m, 1H).

**$^{13}C$  NMR** (151 MHz,  $CDCl_3$ )  $\delta$  208.4, 138.3, 131.5, 123.2, 83.8, 81.6, 76.2, 69.3, 44.2, 37.0, 28.4, 25.5, 24.5, 23.5, 23.2, 22.1, 15.4, 15.1

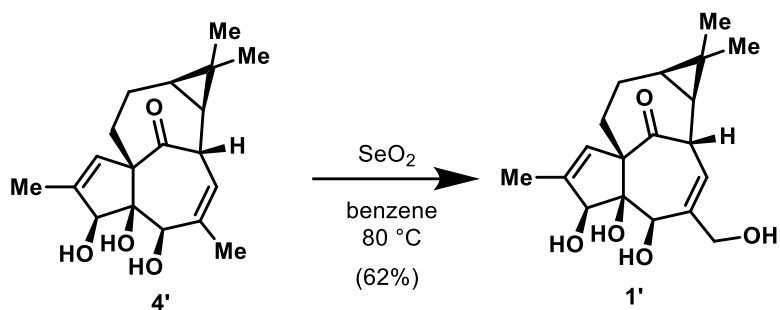

**Synthesis of **1'**:** To a solution of **4'** (1.7 mg, 5.3  $\mu$ mol, 1.0 equiv) in benzene (1.2 mL, 0.005 M) was added  $SeO_2$  (5.9 mg, 0.053 mmol, 10.0 equiv). The suspension was stirred at 80 °C for 9 h. After cooling to room temperature, the reaction mixture was filtered through Celite®, washed with EtOAc, and then concentrated under reduced pressure. Purification by PTLC ( $CH_2Cl_2/MeOH$  = 9:1) yielded **1'** (1.1 mg, 62%) as a colorless oil.

**Physical state:** colorless oil

$R_f = 0.38$  (DCM/MeOH = 9:1; anisaldehyde)

**HRMS** ( $m/z$ ): calc. for  $C_{19}H_{26}NaO_5$   $[M+Na]^+ = 357.1678$ ; found, 357.1670

$[\alpha]_D = -12.7^\circ$  ( $c = 0.11$ ,  $CH_2Cl_2$ )

**$^1H$  NMR** (600 MHz,  $CDCl_3$ )  $\delta$  6.07 (d,  $J = 4.8$  Hz, 1H), 5.81 (d,  $J = 1.6$  Hz, 1H), 4.43 (s, 1H), 4.22 – 4.08 (m, 3H), 3.85 (s, 1H), 2.10 – 1.89 (m, 4H), 1.83 (d,  $J = 1.5$  Hz, 3H), 1.66–1.61 (m, 1H), 1.11 (s, 3H), 1.06 (s, 3H), 0.95 (dd,  $J = 12.0, 8.3$  Hz, 1H), 0.71–0.67 (m, 1H).

**$^{13}C$  NMR** (151 MHz,  $CDCl_3$ )  $\delta$  208.0, 140.4, 138.7, 130.9, 127.0, 83.7, 81.0, 75.2, 69.3, 67.1, 44.3, 36.7, 28.4, 25.6, 24.6, 23.2, 23.1, 15.5, 15.1.

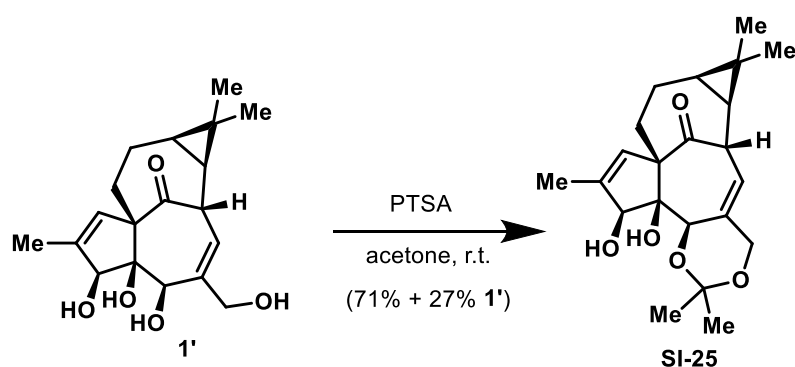

Synthesis of **SI-25**:<sup>3</sup> Compound **1'** (1.5 mg, 4.5  $\mu$ mol) was dissolved in a solution of *p*-toluenesulfonic acid monohydrate in acetone (0.2 mg/mL, 0.5 mL) and stirred at room temperature for 0.5 h. The reaction was quenched by few drops of saturated aqueous  $NaHCO_3$  and concentrated under reduced pressure. The residue was dissolved in EtOAc (1.0 mL), washed with brine and concentrated to provide crude product. Purification by PTLC (Hex/EtOAc = 7:3) to afforded recovered **1'** (0.4 mg, 27%) and **SI-25** (1.2 mg, 71%) as a colorless oil.

**Physical state:** colorless oil

$R_f = 0.71$  (Hex/EtOAc = 7:3; anisaldehyde)

**HRMS** ( $m/z$ ): calc. for  $C_{22}H_{30}NaO_5$   $[M+Na]^+ = 397.1997$ ; found, 397.1997

$[\alpha]_D = -19.3^\circ$  ( $c = 0.15$ ,  $CH_2Cl_2$ )

**<sup>1</sup>H NMR** (600 MHz, CDCl<sub>3</sub>) δ 5.82 (dd, *J* = 3.9, 1.9 Hz, 1H), 5.79 (d, *J* = 1.6 Hz, 1H), 4.26 (s, 1H), 4.22 – 4.06 (m, 3H), 3.95 (s, 1H), 2.19 – 2.13 (m, 1H), 2.05 – 1.90 (m, 2H), 1.83 (d, *J* = 1.5 Hz, 3H), 1.66 – 1.57 (m, 1H), 1.42 (s, 3H), 1.35 (s, 3H), 1.11 (s, 3H), 1.05 (s, 3H), 0.92 (dd, *J* = 12.0, 8.3 Hz, 1H), 0.70-0.66 (m, 1H).

**<sup>13</sup>C NMR** (151 MHz, CDCl<sub>3</sub>) δ 208.5, 139.4, 136.1, 130.4, 122.0, 100.5, 82.8, 80.4, 73.6, 69.5, 64.1, 44.3, 35.7, 28.4, 26.6, 25.8, 24.5, 23.3, 23.2, 21.0, 15.5, 15.4.

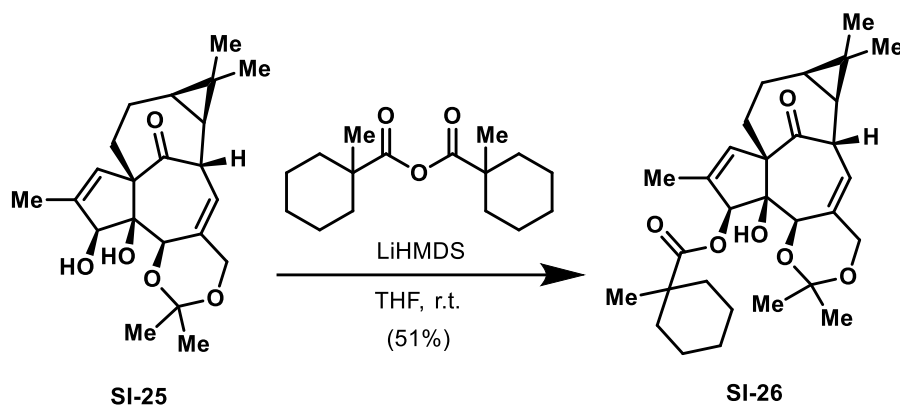

**Synthesis of SI-26:**<sup>3</sup> To a solution of **SI-25** (1.5 mg, 4 μmol, 1.0 equiv) and 1-methylcyclohexane-1-carboxylic anhydride (3.2 mg, 12 μmol, 3.0 equiv) in THF (0.4 mL) was added a solution of LiHMDS in THF (1.0 M, 22 μL, 22 μmol, 5.0 equiv) at room temperature. The solution was stirred at room temperature for 10 min, diluted with Et<sub>2</sub>O (1 mL), and washed with H<sub>2</sub>O. The aqueous phase was extracted with Et<sub>2</sub>O (3 × 1 mL). The combined organic phases were concentrated under reduced pressure. Purification by PTLC (Hex/EtOAc = 4:1) to afforded **SI-26** (1.1 mg, 51%) as a white oil.

**Physical state:** white oil

**R<sub>f</sub>** = 0.63 (Hex/EtOAc = 7:3; anisaldehyde)

**HRMS** (*m/z*): calc. for C<sub>30</sub>H<sub>43</sub>O<sub>6</sub> [M+H]<sup>+</sup> = 521.2879; found, 521.2875

**[α]<sub>D</sub>** = +2.4° (*c* = 0.21, CH<sub>2</sub>Cl<sub>2</sub>)

**<sup>1</sup>H NMR** (600 MHz, CDCl<sub>3</sub>) δ 5.91 (d, *J* = 1.6 Hz, 1H), 5.81 – 5.77 (m, 1H), 5.56 (s, 1H), 4.26 – 4.10 (m, 3H), 4.03 (s, 1H), 2.25 (dt, *J* = 14.3, 3.7 Hz, 1H), 2.11 – 1.86 (m,

3H), 1.73 (d,  $J = 1.6$  Hz, 3H), 1.62 – 1.53 (m, 5H), 1.47 (s, 3H), 1.41 (s, 3H), 1.36–1.21 (m, 5H), 1.19 (s, 3H), 1.08 (s, 3H), 1.04 (s, 3H), 0.94 – 0.85 (m, 1H), 0.69–0.65 (m, 1H).

**$^{13}\text{C}$  NMR** (151 MHz,  $\text{CDCl}_3$ )  $\delta$  208.7, 178.2, 136.4, 136.1, 132.9, 121.7, 100.3, 83.8, 81.8, 73.7, 68.9, 64.3, 44.0, 43.6, 35.7, 35.6, 35.4, 34.9, 28.4, 26.7, 26.0, 25.8, 25.6, 24.8, 23.3, 23.2, 23.1, 20.8, 15.6, 15.4.

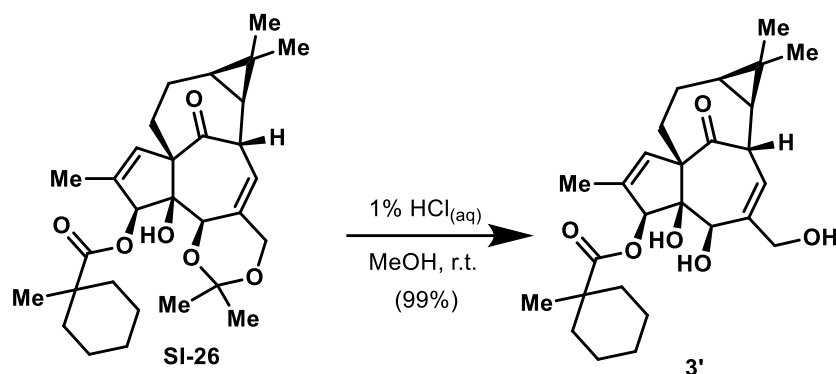

**Synthesis of  $\mathbf{3'}$ :**<sup>3</sup> A solution of **SI-26** (0.4 mg, 0.8  $\mu\text{mol}$ ) in methanol (0.2 mL), which contains 1 % of concentrated aqueous hydrochloric acid solution, was stirred at room temperature for 1 h. The solution was concentrated under reduced pressure. Purification by PTLC (Hex/EtOAc = 5:5) to afforded **3'** (0.4 mg, 99%) as a colorless oil.

**Physical state:** colorless oil

$R_f = 0.33$  (Hex/EtOAc = 1:1; anisaldehyde)

**HRMS** ( $m/z$ ): calc. for  $\text{C}_{27}\text{H}_{38}\text{NaO}_6$  [ $\text{M}+\text{Na}$ ] $^{+} = 481.2566$ ; found, 481.2559

$[\alpha]_D^{25} = +5.4^\circ$  ( $c = 0.13$ ,  $\text{CH}_2\text{Cl}_2$ )

**$^1\text{H}$  NMR** (600 MHz,  $\text{CDCl}_3$ )  $\delta$  6.07 (d,  $J = 4.0$  Hz, 1H), 5.90 (d,  $J = 1.6$  Hz, 1H), 5.43 (s, 1H), 4.18 – 4.12 (m, 3H), 4.08 (s, 1H), 2.15 (dt,  $J = 14.2, 3.8$  Hz, 1H), 2.09 – 1.88 (m, 3H), 1.75 (d,  $J = 1.5$  Hz, 3H), 1.67 – 1.24 (m, 10H), 1.21 (s, 3H), 1.08 (s, 3H), 1.05 (s, 3H), 0.93 (dd,  $J = 12.0, 8.3$  Hz, 1H), 0.70–0.66 (m, 1H).

**$^{13}\text{C}$  NMR** (151 MHz,  $\text{CDCl}_3$ )  $\delta$  207.6, 179.0, 139.1, 135.4, 132.8, 128.2, 84.5, 82.9, 77.0 (verify by HSQC), 68.7, 67.5, 43.8, 43.7, 36.0, 35.6, 35.6, 28.3, 25.8, 25.7, 24.8, 23.3, 23.3, 23.2, 23.1, 15.6, 15.2 (one signal does not appear due to incidental overlap).

## Biological experiments:

**Table S1.** Biological testing of C20-hydroxylated ingenol analogs **5**, **6**, **9**, **10**, **13** and desmethyl compound **3'** compared to reference compound **3**, illuminating the minimally required functional groups on the ingenane core (N/A = not available; green = high potency; yellow = intermediate potency; red = low potency/inactive). This is the full table version of Table 1 (shown in the main text) including  $E_{\max}$  values.

|                                           |             | EC <sub>50</sub><br>PKC $\delta$ binding<br>(nM) | E <sub>max</sub><br>PKC $\delta$<br>(%) | EC <sub>50</sub><br>IL-8 HEKa<br>(nM) | E <sub>max</sub><br>IL-8 HEKa<br>(%) | EC <sub>50</sub><br>ox burst hPMN<br>(nM) | E <sub>max</sub><br>ox burst hPMN<br>(%) | EC <sub>50</sub><br>PKC $\beta$ II binding<br>(nM) | E <sub>max</sub><br>PKC $\beta$<br>(%) |
|-------------------------------------------|-------------|--------------------------------------------------|-----------------------------------------|---------------------------------------|--------------------------------------|-------------------------------------------|------------------------------------------|----------------------------------------------------|----------------------------------------|
| higher oxidation state; greater potency ↑ | <b>3</b>    | 11                                               | 98                                      | 8                                     | 87                                   | 7                                         | 114                                      | 0.2                                                | 46                                     |
|                                           | <b>5</b>    | 80                                               | 89                                      | 26                                    | 83                                   | 7                                         | 106                                      | 0.8                                                | 86                                     |
|                                           | <b>6</b>    | 154                                              | 86                                      | 35                                    | 111                                  | 9                                         | 108                                      | 0.2                                                | 71                                     |
|                                           | <b>9</b>    | 1110                                             | 92                                      | 130                                   | 107                                  | 13                                        | 99                                       | 6                                                  | 62                                     |
|                                           | <b>10</b>   | >10000                                           | N/A                                     | >19000                                | N/A                                  | 478                                       | 81                                       | 828                                                | 91                                     |
|                                           | <b>13</b>   | >10000                                           | N/A                                     | >10200                                | N/A                                  | >10200                                    | N/A                                      | >10000                                             | N/A                                    |
|                                           | <b>3' *</b> | 7                                                | 92                                      | 4                                     | 90                                   | 4                                         | 111                                      | 0.1                                                | 57                                     |

  

**Ingenane structures:**

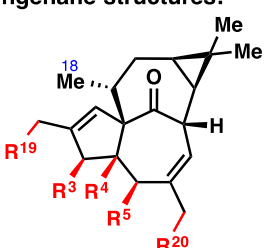

|             | R <sup>3</sup> | R <sup>4</sup> | R <sup>5</sup> | R <sup>19</sup> | R <sup>20</sup> |
|-------------|----------------|----------------|----------------|-----------------|-----------------|
| <b>3</b>    | OR             | OH             | OH             | H               | OH              |
| <b>5</b>    | OR             | OH             | H              | H               | OH              |
| <b>6</b>    | OR             | H              | OH             | H               | OH              |
| <b>9</b>    | OR             | H              | H              | H               | OH              |
| <b>10</b>   | H              | H              | H              | OR              | OH              |
| <b>13</b>   | H              | H              | H              | H               | OH              |
| <b>3' *</b> | OR             | OH             | OH             | H               | OH              |

R = 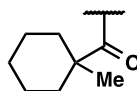

\* = without C18-methyl group

**Table S2.** Expression of mRNA of classical and novel PKC isoforms in primary human keratinocytes and neutrophils, respectively. **(A)** Raw data (CT values) from quantitative PCR (qPCR). **(B)** Calculated relative expression normalized to PKC $\delta$  expression level (normalization was separately performed for each cell type)

| <b>A) Raw data</b><br>(C <sub>T</sub> values) | <b>Primary human keratinocytes</b><br>(HeKa) |                |                | <b>Primary human neutrophils (PMN)</b> |                |
|-----------------------------------------------|----------------------------------------------|----------------|----------------|----------------------------------------|----------------|
|                                               | <b>Donor 1</b>                               | <b>Donor 2</b> | <b>Donor 3</b> | <b>Donor 4</b>                         | <b>Donor 5</b> |
| <b>PRKCalpha</b>                              | 30.07                                        | 29.69          | 30.38          | 34.00                                  | 34.00          |
| <b>PRKCbeta</b>                               | 35.21                                        | 36.94          | 35.97          | 25.00                                  | 26.50          |
| <b>PRKCgamma</b>                              | 40.00                                        | 40.00          | 40.00          | 40.00                                  | 40.00          |

|                    |       |       |       |       |       |
|--------------------|-------|-------|-------|-------|-------|
| <b>PRKCdelta</b>   | 28.56 | 28.77 | 28.91 | 30.26 | 30.00 |
| <b>PRKCeta</b>     | 28.75 | 28.94 | 28.54 | 30.00 | 30.00 |
| <b>PRKCtheta</b>   | 31.71 | 31.95 | 32.00 | 34.87 | 34.00 |
| <b>PRKCepsilon</b> | 32.00 | 32.51 | 31.14 | 36.00 | 34.00 |
| <b>GAPDH</b>       | 21.94 | 22.87 | 21.81 | 30.40 | 30.00 |

| <b>B) <u>Relative levels</u></b><br>( $x = 2^{-\Delta\Delta C_T}$ ) | <b>Primary human keratinocytes (HeKa)</b> |                |                | <b>Primary human neutrophils (PMN)</b> |                |
|---------------------------------------------------------------------|-------------------------------------------|----------------|----------------|----------------------------------------|----------------|
|                                                                     | <b>Donor 1</b>                            | <b>Donor 2</b> | <b>Donor 3</b> | <b>Donor 4</b>                         | <b>Donor 5</b> |
| <b>PRKCalpha</b>                                                    | 0.35                                      | 0.53           | 0.36           | 0.08                                   | 0.06           |
| <b>PRKCbata</b>                                                     | 0.01                                      | 0.00           | 0.01           | 38.26                                  | 11.32          |
| <b>PRKCgamma</b>                                                    | nd                                        | nd             | nd             | nd                                     | nd             |
| <b>PRKCdelta</b>                                                    | 1.00                                      | 1.00           | 1.00           | 1.00                                   | 1.00           |
| <b>PRKCeta</b>                                                      | 0.88                                      | 0.89           | 1.29           | 1.20                                   | 1.00           |
| <b>PRKCtheta</b>                                                    | 0.11                                      | 0.11           | 0.12           | 0.04                                   | 0.06           |
| <b>PRKCepsilon</b>                                                  | 0.09                                      | 0.08           | 0.21           | 0.02                                   | 0.06           |

## Methods

### Neutrophil oxidative burst:

Primary human PMN's (polymorphonuclear leukocytes) were isolated and purified from fresh buffy coats by sequential sedimentation, density centrifugation and lysis of contaminating erythrocytes. Buffy coats were incubated with 2% methocel for 30-45 min to differentially sediment red blood cells. The leukocyte-rich supernatant was transferred to Lymphoprep™ tubes to remove mononuclear cells by density centrifugation (400xg, 30 min). The pellet was re-suspended and any remaining erythrocytes lysed using 0.2% NaCl for 30 sec before restoring isotonicity by the

addition of 1.2% NaCl. This step was repeated until the cell pellet appeared relatively free of red blood cells. Cells were re-suspended in DPBS (Dulbecco's Phosphate Buffered Saline; without  $\text{Ca}^{2+}$ ,  $\text{Mg}^{2+}$ ) and the concentration adjusted to  $1.4 \times 10^6$  cells/ml in HBSS (Hanks Balanced Salt solution; with  $\text{Ca}^{2+}$ ,  $\text{Mg}^{2+}$ ) containing 0.1% BSA (Bovine Serum Albumin) and 5mM glucose just prior to assay initiation. Titrated reference and test compounds were pre-mixed with HE (hydroethidine; 10 $\mu$ M final assay concentration) before addition to 96-well plates containing  $2.5 \times 10^5$  cells. Following 40 min incubation at RT, changes in the respiratory burst was estimated by measuring fluorescence at 579 nm (excitation: 485 nm) using an Envision plate reader.

Test compound titration curves were fitted to a four-parameter sigmoidal curve after normalizing the effect of the test compound to the effect of the positive control ( $5 \times 10^{-7}$  M ingenol mebutate). Relative EC50 is defined as the concentration of test compound producing an effect that is midway between the fitted top and bottom. Absolute EC50 is the concentration of test compound that provokes a response corresponding to 50% of the maximal effect associated with the positive control ( $5 \times 10^{-7}$  M ingenol mebutate). Results represent average of two independent determinations run in duplicate on individual plates.

#### **HeKa cytokine release (IL-8):**

Primary human epidermal keratinocytes (HeKa), were seeded (10,000 cells/well) in 96-well plates the day before the assay. Test compounds were diluted in DMSO (dimethyl sulfoxide) and further diluted in assay medium and pipetted into wells of 96 well-plates containing HeKa cells. The plates were incubated for 6h at 37°C in humidified air with 5% CO<sub>2</sub>. Plates were centrifuged briefly to spin down cells at 4°C, the supernatant was removed and analyzed by Meso Scale Discovery (MSD) 4-spot cytokine assay (Pro-inflammatory II Ultra Sensitive kit, MSD, MD, USA). The MSD assay employs a sandwich immunoassay format where capture antibodies are coated in a patterned array on the bottom of the wells of a 4-Spot- Multi-MSD plate. Standard samples were incubated in the MULTI-SPOT plates as well, and the cytokine (IL-8) binds to its corresponding capture antibody spot. The cytokine level was quantitated on a SECTOR™ Imager using a cytokine-specific Detection Antibody labeled with MSD SULFO-TAG™ reagent.

Test compound titration curves were fitted to a four-parameter sigmoidal curve after normalizing the effect of the test compound to the effect of the positive control ( $1.5 \times 10^{-7}$  M PEP0005). Results represent average of two independent determinations run in duplicate on individual plates.

### **Human PKC delta (PKC $\delta$ ) activation**

The potency and efficacy of test compounds in stimulating human recombinant protein kinase C (PKC) delta isoform was determined by measuring phosphorylation of a PKC substrate peptide using  $^{33}\text{P}$ -ATP. Data points for the EC<sub>50</sub> determinations were performed in duplicate. The assay was performed at Millipore (Dundee, UK).

Human PKC delta (PKC $\delta$ , Millipore cat# 14-504) was diluted in 20 mM HEPES, 0.03% Triton X-100. Amount of enzyme in each assay was 7.25 ng, final assay volume 25  $\mu\text{L}$ . All compounds for testing were diluted to 1 mM in 100% DMSO as an intermediary dilution. The compounds were then diluted further to 50  $\mu\text{M}$ , and then serially diluted in 100% DMSO in semi-logarithmic decrements for 12 points. 0.5  $\mu\text{L}$  of each concentration, in duplicate, was pipetted into a dry 96 well assay plate using a TTP Mosquito. Control and blank wells received 0.5  $\mu\text{L}$  of 100% DMSO instead of compound. This was followed by addition of 14.5  $\mu\text{L}$  of assay mixture, containing appropriately diluted enzyme and 20 mM HEPES pH 7.4, 0.03% Triton X-100, 0.05 mg/mL phosphatidylserine, and 50  $\mu\text{M}$  of the substrate peptide ERM $\text{RPRKRQGSVRRRV}$ . The assay was started with the addition of 10  $\mu\text{L}$  ATP containing  $\gamma$ - $^{33}\text{P}$ -ATP (specific activity approx. 500 cpm/pmol) to a final assay concentration of 15  $\mu\text{M}$ . The reaction was allowed to proceed at room temperature for 40 min before the addition of 5  $\mu\text{L}$  3% ortho-phosphoric acid. Blank wells were acid blanks, and had 5  $\mu\text{L}$  3% ortho-phosphoric acid added before the addition of ATP. 10  $\mu\text{L}$  of the stopped reaction products was transferred to a P30 filtermat which was then washed 4 times in 75 mM ortho-phosphoric acid, and once in methanol before drying. The filter was read by liquid scintillation counting using a Wallac Trilux.

### **Human PKC beta II (PKC $\beta$ II) activation**

The potency and efficacy of test compounds in stimulating human recombinant protein kinase C (PKC) beta II isoform was determined by measuring phosphorylation of the PKC substrate histone H1 using  $^{33}\text{P}$ -ATP. Data points for the EC<sub>50</sub> determinations were performed in duplicate. The assay was performed at Millipore (Dundee, UK).

Human PKC beta II (PKC $\beta$  II, Millipore cat# 14-496) was incubated with 20 mM HEPES pH 7.4, 0.03% Triton X-100, 0.1 mM  $\text{CaCl}_2$ , 0.1 mg/mL phosphatidylserine, 0.1 mg/mL histone H1, 10 mM  $\text{Mg}(\text{OAc})_2$ . Amount of enzyme in each assay was 1.8 ng (final assay volume is 25  $\mu\text{L}$ ). The compounds were then diluted to 500  $\mu\text{M}$ , and then serially diluted in 100% DMSO in semi-logarithmic decrements for 12 points. 0.5  $\mu\text{L}$  of each concentration, in duplicate, was pipetted into a dry 96 well assay plate using a TTP Mosquito. Control and blank wells received 0.5  $\mu\text{L}$  of 100% DMSO instead of

compound. 14.5  $\mu$ l kinase in assay buffer was added to each well. The assay was started with the addition of 10  $\mu$ L ATP containing  $\gamma$ -<sup>33</sup>P-ATP] (specific activity approx. 500 cpm/pmol), to a final assay concentration of 70  $\mu$ M. The reaction was allowed to proceed at room temperature for 40 min before the addition of 5  $\mu$ L 3% ortho-phosphoric acid. Blank wells were acid blanks, and had 5  $\mu$ L 3% ortho-phosphoric acid added before the addition of ATP. 10  $\mu$ L of the stopped reaction products was transferred to a P30 filtermat which was then washed 4 times in 75 mM ortho-phosphoric acid, and once in methanol before drying. The filter was read by liquid scintillation counting using a Wallac Trilux.

### **PKC isoform expression in primary human keratinocytes and polymorphonuclear cells**

RNA was extracted from freshly isolated PMN (two different donors) or mono-layers of primary human epidermal keratinocytes (three different donors). Following RNA reverse-transcription, relative gene expression levels of classical ( $\alpha$ ,  $\beta$ ,  $\gamma$ ) and novel ( $\delta$ ,  $\eta$ ,  $\epsilon$ ,  $\theta$ ) PKC isoforms was determined by real-time quantitative PCR (qPCR) using validated gene expression assays (Applied Biosystems; Hs99999905\_m1 / GAPDH, Hs\_00925195\_m1 / PRKCalpha, Hs\_00176998\_m1 / PRKCbeta, Hs\_00177010\_m1 / PRKCgamma, Hs\_00178914\_m1 / PRKCdelta, Hs\_00178933\_m1 / PRKCeta, Hs\_00178455\_m1 / PRKCepsilon, Hs\_00989970\_m1 / PRKCtheta) and ABI PRISM® 7900HT sequence detection system. Data was normalized to GAPDH and relative quantitation of PKC isoform gene expression was done using the Comparative ( $\Delta\Delta C_T$ ) Method (cf. Applied Biosystems, [User Bulletin #2](#)).

## X-ray Crystallographic Data

Figure S1. X ray structure for **SI-4**

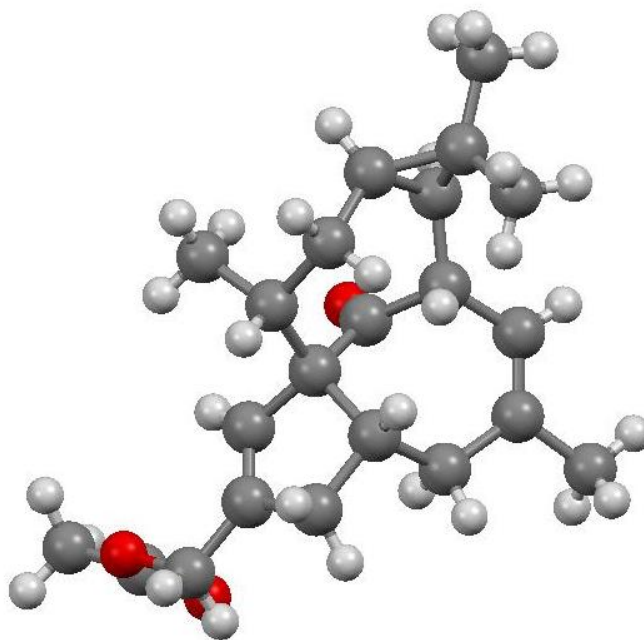

Table S3. Crystal data and structure refinement for **SI-4**.

|                        |                                                         |
|------------------------|---------------------------------------------------------|
| Identification code    | CCDC #1415412                                           |
| Empirical formula      | C <sub>22</sub> H <sub>30</sub> O <sub>3</sub>          |
| Formula weight         | 342.46                                                  |
| Temperature            | 273(2) K                                                |
| Wavelength             | 0.71073 Å                                               |
| Crystal system         | Monoclinic                                              |
| Space group            | P 21                                                    |
| Unit cell dimensions   | a = 6.6579(4) Å<br>b = 8.2473(5) Å<br>c = 17.4458(10) Å |
| Volume                 | 957.92(10) Å <sup>3</sup>                               |
| Z                      | 2                                                       |
| Density (calculated)   | 1.187 Mg/m <sup>3</sup>                                 |
| Absorption coefficient | 0.077 mm <sup>-1</sup>                                  |
| F(000)                 | 372                                                     |

□ = 90°.  
□ = 90.413(3)°.  
□ = 90°.

|                                   |                                             |
|-----------------------------------|---------------------------------------------|
| Crystal size                      | 0.330 x 0.300 x 0.250 mm <sup>3</sup>       |
| Theta range for data collection   | 2.335 to 26.374°.                           |
| Index ranges                      | -8<=h<=8, -10<=k<=10, -21<=l<=21            |
| Reflections collected             | 16246                                       |
| Independent reflections           | 3911 [R(int) = 0.0515]                      |
| Completeness to theta = 25.000°   | 99.9 %                                      |
| Absorption correction             | Multi-scan                                  |
| Refinement method                 | Full-matrix least-squares on F <sup>2</sup> |
| Data / restraints / parameters    | 3911 / 1 / 231                              |
| Goodness-of-fit on F <sup>2</sup> | 1.052                                       |
| Final R indices [I>2sigma(I)]     | R1 = 0.0324, wR2 = 0.0810                   |
| R indices (all data)              | R1 = 0.0335, wR2 = 0.0821                   |
| Absolute structure parameter      | -0.2(4)                                     |
| Extinction coefficient            | n/a                                         |
| Largest diff. peak and hole       | 0.238 and -0.153 e.Å <sup>-3</sup>          |

Figure S2. X ray structure for **26**

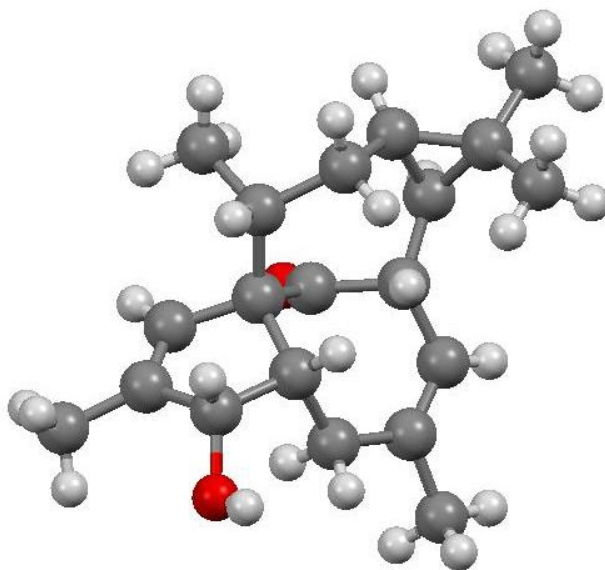

Table S4. Crystal data and structure refinement for **26**.

|                                 |                                                |          |
|---------------------------------|------------------------------------------------|----------|
| Identification code             | CCDC #1415413                                  |          |
| Empirical formula               | C <sub>20</sub> H <sub>28</sub> O <sub>2</sub> |          |
| Formula weight                  | 300.42                                         |          |
| Temperature                     | 100(2) K                                       |          |
| Wavelength                      | 1.54178 Å                                      |          |
| Crystal system                  | Orthorhombic                                   |          |
| Space group                     | P 21 21 21                                     |          |
| Unit cell dimensions            | a = 10.1761(2) Å                               | □ = 90°. |
|                                 | b = 12.9916(3) Å                               | □ = 90°. |
|                                 | c = 12.9959(3) Å                               | □ = 90°. |
| Volume                          | 1718.11(7) Å <sup>3</sup>                      |          |
| Z                               | 4                                              |          |
| Density (calculated)            | 1.161 Mg/m <sup>3</sup>                        |          |
| Absorption coefficient          | 0.564 mm <sup>-1</sup>                         |          |
| F(000)                          | 656                                            |          |
| Crystal size                    | 0.400 x 0.350 x 0.320 mm <sup>3</sup>          |          |
| Theta range for data collection | 5.521 to 68.411°.                              |          |
| Index ranges                    | -12 ≤ h ≤ 12, -12 ≤ k ≤ 15, -15 ≤ l ≤ 15       |          |
| Reflections collected           | 10817                                          |          |
| Independent reflections         | 3077 [R(int) = 0.0250]                         |          |
| Completeness to theta = 66.000° | 98.8 %                                         |          |

|                                   |                                             |
|-----------------------------------|---------------------------------------------|
| Absorption correction             | Semi-empirical from equivalents             |
| Max. and min. transmission        | 0.954 and 0.900                             |
| Refinement method                 | Full-matrix least-squares on F <sup>2</sup> |
| Data / restraints / parameters    | 3077 / 0 / 208                              |
| Goodness-of-fit on F <sup>2</sup> | 0.996                                       |
| Final R indices [I>2sigma(I)]     | R1 = 0.0265, wR2 = 0.0660                   |
| R indices (all data)              | R1 = 0.0266, wR2 = 0.0661                   |
| Absolute structure parameter      | 0.05(4) [abs stereochem confirmed]          |
| Extinction coefficient            | 0.0040(13)                                  |
| Largest diff. peak and hole       | 0.179 and -0.117 e.Å <sup>-3</sup>          |

Figure S3. X ray structure for **23**

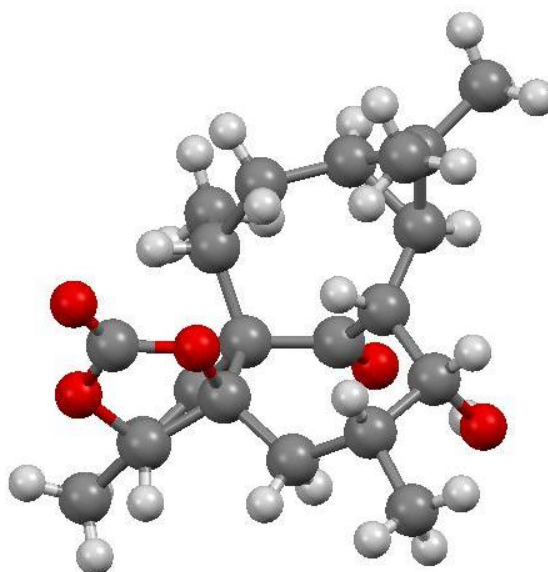

Table S5. Crystal data and structure refinement for **23**.

|                                 |                                                |          |
|---------------------------------|------------------------------------------------|----------|
| Identification code             | CCDC #1415411                                  |          |
| Empirical formula               | C <sub>21</sub> H <sub>28</sub> O <sub>5</sub> |          |
| Formula weight                  | 360.43                                         |          |
| Temperature                     | 100(2) K                                       |          |
| Wavelength                      | 1.54178 Å                                      |          |
| Crystal system                  | Monoclinic                                     |          |
| Space group                     | P 21                                           |          |
| Unit cell dimensions            | a = 6.9165(3) Å                                | □ = 90°. |
|                                 | b = 8.7203(3) Å                                | □ =      |
|                                 | 94.5150(10)°.                                  |          |
|                                 | c = 15.8818(6) Å                               | □ = 90°. |
| Volume                          | 954.92(6) Å <sup>3</sup>                       |          |
| Z                               | 2                                              |          |
| Density (calculated)            | 1.254 Mg/m <sup>3</sup>                        |          |
| Absorption coefficient          | 0.718 mm <sup>-1</sup>                         |          |
| F(000)                          | 388                                            |          |
| Crystal size                    | 0.330 x 0.300 x 0.230 mm <sup>3</sup>          |          |
| Theta range for data collection | 2.791 to 68.331°.                              |          |
| Index ranges                    | -8 ≤ h ≤ 8, -10 ≤ k ≤ 10, -18 ≤ l ≤ 19         |          |

|                                   |                                             |
|-----------------------------------|---------------------------------------------|
| Reflections collected             | 12279                                       |
| Independent reflections           | 3434 [R(int) = 0.0238]                      |
| Completeness to theta = 66.500°   | 99.7 %                                      |
| Absorption correction             | Multi-scan                                  |
| Refinement method                 | Full-matrix least-squares on F <sup>2</sup> |
| Data / restraints / parameters    | 3434 / 1 / 243                              |
| Goodness-of-fit on F <sup>2</sup> | 1.067                                       |
| Final R indices [I>2sigma(I)]     | R1 = 0.0296, wR2 = 0.0803                   |
| R indices (all data)              | R1 = 0.0297, wR2 = 0.0804                   |
| Absolute structure parameter      | 0.06(4)                                     |
| Extinction coefficient            | n/a                                         |
| Largest diff. peak and hole       | 0.188 and -0.163 e.Å <sup>-3</sup>          |

Figure S4. X ray structure for **21**

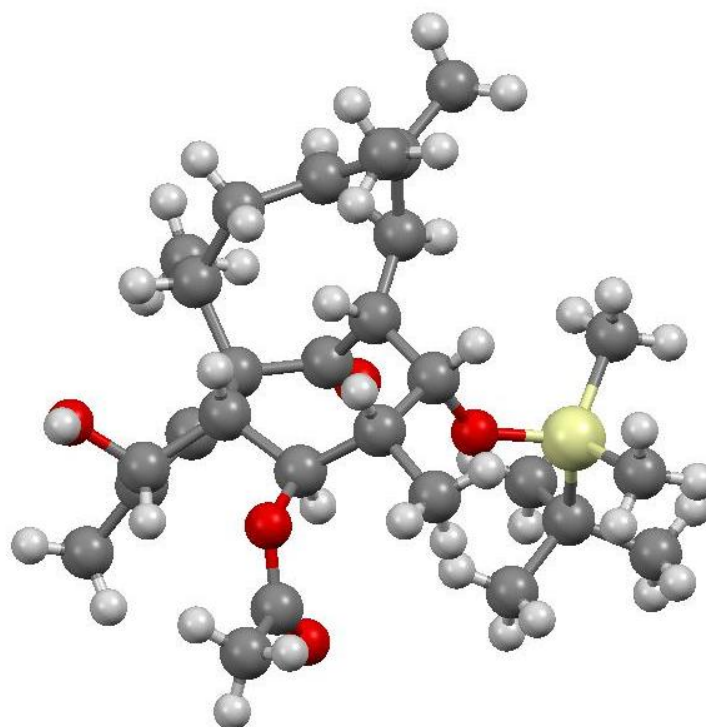

Table S6. Crystal data and structure refinement for **21**.

|                        |                                                   |          |
|------------------------|---------------------------------------------------|----------|
| Report date            | 2015-03-04                                        |          |
| Identification code    | CCDC #1415410                                     |          |
| Empirical formula      | C <sub>28</sub> H <sub>46</sub> O <sub>5</sub> Si |          |
| Molecular formula      | C <sub>28</sub> H <sub>46</sub> O <sub>5</sub> Si |          |
| Formula weight         | 490.74                                            |          |
| Temperature            | 100.0 K                                           |          |
| Wavelength             | 1.54178 Å                                         |          |
| Crystal system         | Orthorhombic                                      |          |
| Space group            | P2 <sub>1</sub> 2 <sub>1</sub> 2 <sub>1</sub>     |          |
| Unit cell dimensions   | a = 10.0766(2) Å                                  | □ = 90°. |
|                        | b = 15.6158(4) Å                                  | □ = 90°. |
|                        | c = 18.4872(4) Å                                  | □ = 90°. |
| Volume                 | 2909.04(11) Å <sup>3</sup>                        |          |
| Z                      | 4                                                 |          |
| Density (calculated)   | 1.120 Mg/m <sup>3</sup>                           |          |
| Absorption coefficient | 0.968 mm <sup>-1</sup>                            |          |
| F(000)                 | 1072                                              |          |

|                                   |                                             |
|-----------------------------------|---------------------------------------------|
| Crystal size                      | 0.357 x 0.217 x 0.209 mm <sup>3</sup>       |
| Crystal color, habit              | Colorless Block                             |
| Theta range for data collection   | 3.705 to 68.262°.                           |
| Index ranges                      | -11<=h<=12, -18<=k<=15, -22<=l<=22          |
| Reflections collected             | 21090                                       |
| Independent reflections           | 5254 [R(int) = 0.0397]                      |
| Completeness to theta = 68.000°   | 99.1 %                                      |
| Absorption correction             | Semi-empirical from equivalents             |
| Max. and min. transmission        | 0.3200 and 0.2156                           |
| Refinement method                 | Full-matrix least-squares on F <sup>2</sup> |
| Data / restraints / parameters    | 5254 / 0 / 319                              |
| Goodness-of-fit on F <sup>2</sup> | 1.026                                       |
| Final R indices [I>2sigma(I)]     | R1 = 0.0301, wR2 = 0.0784                   |
| R indices (all data)              | R1 = 0.0307, wR2 = 0.0788                   |
| Absolute structure parameter      | 0.020(8)                                    |
| Extinction coefficient            | n/a                                         |
| Largest diff. peak and hole       | 0.205 and -0.168 e.Å <sup>-3</sup>          |

Figure S5. X ray structure for **4'**.

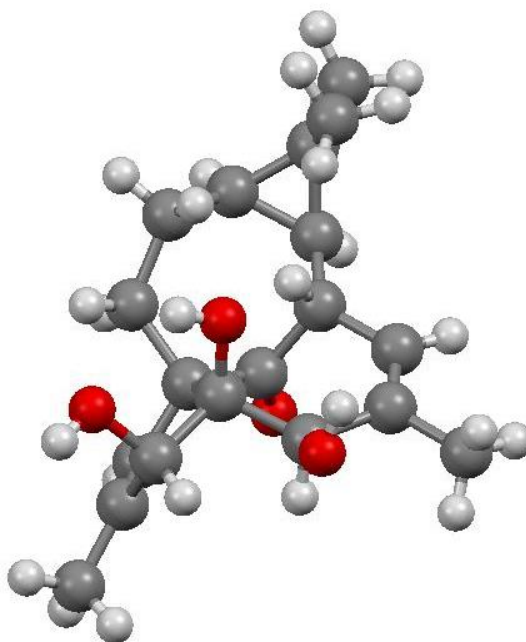

Table S7. Crystal data and structure refinement for **4'**.

|                        |                                                |                 |
|------------------------|------------------------------------------------|-----------------|
| Report date            | 2015-04-14                                     |                 |
| Identification code    | CCDC #1415409                                  |                 |
| Empirical formula      | C <sub>19</sub> H <sub>26</sub> O <sub>4</sub> |                 |
| Molecular formula      | C <sub>19</sub> H <sub>26</sub> O <sub>4</sub> |                 |
| Formula weight         | 318.40                                         |                 |
| Temperature            | 100.0 K                                        |                 |
| Wavelength             | 1.54178 Å                                      |                 |
| Crystal system         | Monoclinic                                     |                 |
| Space group            | P 1 21 1                                       |                 |
| Unit cell dimensions   | a = 6.5753(4) Å                                | □ = 90°.        |
|                        | b = 8.2073(5) Å                                | □ = 94.490(2)°. |
|                        | c = 15.4143(9) Å                               | □ = 90°.        |
| Volume                 | 829.29(9) Å <sup>3</sup>                       |                 |
| Z                      | 2                                              |                 |
| Density (calculated)   | 1.275 Mg/m <sup>3</sup>                        |                 |
| Absorption coefficient | 0.709 mm <sup>-1</sup>                         |                 |
| F(000)                 | 344                                            |                 |

|                                   |                                             |
|-----------------------------------|---------------------------------------------|
| Crystal size                      | 0.253 x 0.131 x 0.127 mm <sup>3</sup>       |
| Crystal color, habit              | Colorless Block                             |
| Theta range for data collection   | 6.754 to 68.023°.                           |
| Index ranges                      | -7<=h<=7, -9<=k<=9, -18<=l<=18              |
| Reflections collected             | 20860                                       |
| Independent reflections           | 2889 [R(int) = 0.0391]                      |
| Completeness to theta = 68.000°   | 97.4 %                                      |
| Absorption correction             | Semi-empirical from equivalents             |
| Max. and min. transmission        | 0.3197 and 0.2253                           |
| Refinement method                 | Full-matrix least-squares on F <sup>2</sup> |
| Data / restraints / parameters    | 2889 / 1 / 215                              |
| Goodness-of-fit on F <sup>2</sup> | 1.065                                       |
| Final R indices [I>2sigma(I)]     | R1 = 0.0277, wR2 = 0.0705                   |
| R indices (all data)              | R1 = 0.0278, wR2 = 0.0705                   |
| Absolute structure parameter      | 0.04(5)                                     |
| Extinction coefficient            | n/a                                         |
| Largest diff. peak and hole       | 0.174 and -0.140 e.Å <sup>-3</sup>          |

## References

1. Jørgensen, L.; McKerrall, S. J.; Kuttruff, C. A.; Ungeheuer, F.; Felding J.; Baran, P. *S. Science* **2013**, *341*, 878–882.
2. Paquette, L. A.; Ross R. J.; Shi, Y. *J. Org. Chem.* **1990**, *55*, 1589–1598.
3. Liang, X.; Grue-Sørensen, G.; Petersen, A. K.; Högberg, T. *Synlett* **2012**, *23*, 2647–2652.

## SUPPORTING INFORMATION

### Part 2: NMR Spectrum

#### Table of Contents

|                                                |      |           |
|------------------------------------------------|------|-----------|
| Spectra for compounds.....                     | page | SI-77~178 |
| Compound <b>SI-1</b> $^1\text{H}$ NMR.....     | page | SI-77     |
| Compound <b>SI-1</b> $^{13}\text{C}$ NMR.....  | page | SI-78     |
| Compound <b>17</b> $^1\text{H}$ NMR.....       | page | SI-79     |
| Compound <b>17</b> $^{13}\text{C}$ NMR.....    | page | SI-80     |
| Compound <b>25</b> $^1\text{H}$ NMR.....       | page | SI-81     |
| Compound <b>25</b> $^{13}\text{C}$ NMR.....    | page | SI-82     |
| Compound <b>SI-3</b> $^1\text{H}$ NMR.....     | page | SI-83     |
| Compound <b>SI-3</b> $^{13}\text{C}$ NMR.....  | page | SI-84     |
| Compound <b>12</b> $^1\text{H}$ NMR.....       | page | SI-85     |
| Compound <b>12</b> $^{13}\text{C}$ NMR.....    | page | SI-86     |
| Compound <b>10</b> $^1\text{H}$ NMR.....       | page | SI-87     |
| Compound <b>10</b> $^{13}\text{C}$ NMR.....    | page | SI-88     |
| Compound <b>SI-4</b> $^1\text{H}$ NMR.....     | page | SI-89     |
| Compound <b>SI-4</b> $^{13}\text{C}$ NMR.....  | page | SI-90     |
| Compound <b>14</b> $^1\text{H}$ NMR.....       | page | SI-91     |
| Compound <b>14</b> $^{13}\text{C}$ NMR.....    | page | SI-92     |
| Compound <b>13</b> $^1\text{H}$ NMR.....       | page | SI-93     |
| Compound <b>13</b> $^{13}\text{C}$ NMR.....    | page | SI-94     |
| Compound <b>13</b> 2D NOESY.....               | page | SI-95     |
| Compound <b>SI-5</b> $^1\text{H}$ NMR.....     | page | SI-96     |
| Compound <b>SI-5</b> $^{13}\text{C}$ NMR.....  | page | SI-97     |
| Compound <b>26</b> $^1\text{H}$ NMR.....       | page | SI-98     |
| Compound <b>26</b> $^{13}\text{C}$ NMR.....    | page | SI-99     |
| Compound <b>11</b> $^1\text{H}$ NMR.....       | page | SI-100    |
| Compound <b>11</b> $^{13}\text{C}$ NMR.....    | page | SI-101    |
| Compound <b>9</b> $^1\text{H}$ NMR.....        | page | SI-102    |
| Compound <b>9</b> $^{13}\text{C}$ NMR.....     | page | SI-103    |
| Compound <b>9</b> 2D NOESY.....                | page | SI-104    |
| Compound <b>22</b> $^1\text{H}$ NMR.....       | page | SI-105    |
| Compound <b>22</b> $^{13}\text{C}$ NMR.....    | page | SI-106    |
| Compound <b>SI-6</b> $^1\text{H}$ NMR.....     | page | SI-107    |
| Compound <b>SI-6</b> $^{13}\text{C}$ NMR.....  | page | SI-108    |
| Compound <b>SI-7</b> $^1\text{H}$ NMR.....     | page | SI-109    |
| Compound <b>SI-7</b> $^{13}\text{C}$ NMR.....  | page | SI-110    |
| Compound <b>SI-8</b> $^1\text{H}$ NMR.....     | page | SI-111    |
| Compound <b>SI-8</b> $^{13}\text{C}$ NMR.....  | page | SI-112    |
| Compound <b>SI-9</b> $^1\text{H}$ NMR.....     | page | SI-113    |
| Compound <b>SI-9</b> $^{13}\text{C}$ NMR.....  | page | SI-114    |
| Compound <b>23</b> $^1\text{H}$ NMR.....       | page | SI-115    |
| Compound <b>23</b> $^{13}\text{C}$ NMR.....    | page | SI-116    |
| Compound <b>SI-10</b> $^1\text{H}$ NMR.....    | page | SI-117    |
| Compound <b>SI-10</b> $^{13}\text{C}$ NMR..... | page | SI-118    |

|                                                 |      |        |
|-------------------------------------------------|------|--------|
| Compound <b>7</b> <sup>1</sup> H NMR.....       | page | SI-119 |
| Compound <b>7</b> <sup>13</sup> C NMR.....      | page | SI-120 |
| Compound <b>5</b> <sup>1</sup> H NMR.....       | page | SI-121 |
| Compound <b>5</b> <sup>13</sup> C NMR.....      | page | SI-122 |
| Compound <b>5</b> 2D NOESY .....                | page | SI-123 |
| Compound <b>SI-13</b> <sup>1</sup> H NMR.....   | page | SI-124 |
| Compound <b>SI-13</b> <sup>13</sup> C NMR.....  | page | SI-125 |
| Compound <b>SI-13</b> 2D NOESY .....            | page | SI-126 |
| Compound <b>SI-14</b> <sup>1</sup> H NMR.....   | page | SI-127 |
| Compound <b>SI-14</b> <sup>13</sup> C NMR.....  | page | SI-128 |
| Compound <b>SI-15</b> <sup>1</sup> H NMR.....   | page | SI-129 |
| Compound <b>SI-15</b> <sup>13</sup> C NMR.....  | page | SI-130 |
| Compound <b>20</b> <sup>1</sup> H NMR.....      | page | SI-131 |
| Compound <b>20</b> <sup>13</sup> C NMR.....     | page | SI-132 |
| Compound <b>21</b> <sup>1</sup> H NMR.....      | page | SI-133 |
| Compound <b>21</b> <sup>13</sup> C NMR.....     | page | SI-134 |
| Compound <b>SI-16</b> <sup>1</sup> H NMR.....   | page | SI-135 |
| Compound <b>SI-16</b> <sup>13</sup> C NMR.....  | page | SI-136 |
| Compound <b>SI-17</b> <sup>1</sup> H NMR.....   | page | SI-137 |
| Compound <b>SI-17</b> <sup>13</sup> C NMR.....  | page | SI-138 |
| Compound <b>8</b> <sup>1</sup> H NMR.....       | page | SI-139 |
| Compound <b>8</b> <sup>13</sup> C NMR.....      | page | SI-140 |
| Compound <b>6</b> <sup>1</sup> H NMR.....       | page | SI-141 |
| Compound <b>6</b> <sup>13</sup> C NMR.....      | page | SI-142 |
| Compound <b>6</b> 2D NOESY .....                | page | SI-143 |
| Compound <b>SI-19</b> <sup>1</sup> H NMR.....   | page | SI-144 |
| Compound <b>SI-19</b> <sup>13</sup> C NMR.....  | page | SI-145 |
| Compound <b>SI-19a</b> <sup>1</sup> H NMR.....  | page | SI-146 |
| Compound <b>SI-19a</b> <sup>13</sup> C NMR..... | page | SI-147 |
| Compound <b>SI-20</b> <sup>1</sup> H NMR.....   | page | SI-148 |
| Compound <b>SI-20</b> <sup>13</sup> C NMR.....  | page | SI-149 |
| Compound <b>15'</b> <sup>1</sup> H NMR.....     | page | SI-150 |
| Compound <b>15'</b> <sup>13</sup> C NMR.....    | page | SI-151 |
| Compound <b>SI-21</b> <sup>1</sup> H NMR.....   | page | SI-152 |
| Compound <b>SI-21</b> <sup>13</sup> C NMR.....  | page | SI-153 |
| Compound <b>SI-22</b> <sup>1</sup> H NMR.....   | page | SI-154 |
| Compound <b>SI-22</b> <sup>13</sup> C NMR.....  | page | SI-155 |
| Compound <b>SI-22a</b> <sup>1</sup> H NMR.....  | page | SI-156 |
| Compound <b>SI-22a</b> <sup>13</sup> C NMR..... | page | SI-157 |
| Compound <b>16'</b> <sup>1</sup> H NMR.....     | page | SI-158 |
| Compound <b>16'</b> <sup>13</sup> C NMR.....    | page | SI-159 |
| Compound <b>SI-23</b> <sup>1</sup> H NMR.....   | page | SI-160 |
| Compound <b>SI-23</b> <sup>13</sup> C NMR.....  | page | SI-161 |
| Compound <b>17'</b> <sup>1</sup> H NMR.....     | page | SI-162 |
| Compound <b>17'</b> <sup>13</sup> C NMR.....    | page | SI-163 |
| Compound <b>18'</b> <sup>1</sup> H NMR.....     | page | SI-164 |
| Compound <b>18'</b> <sup>13</sup> C NMR.....    | page | SI-165 |
| Compound <b>SI-24</b> <sup>1</sup> H NMR.....   | page | SI-166 |
| Compound <b>SI-24</b> <sup>13</sup> C NMR.....  | page | SI-167 |
| Compound <b>4'</b> <sup>1</sup> H NMR.....      | page | SI-168 |

|                                                |      |        |
|------------------------------------------------|------|--------|
| Compound <b>4'</b> $^{13}\text{C}$ NMR.....    | page | SI-169 |
| Compound <b>1'</b> $^1\text{H}$ NMR.....       | page | SI-170 |
| Compound <b>1'</b> $^{13}\text{C}$ NMR.....    | page | SI-171 |
| Compound <b>SI-25</b> $^1\text{H}$ NMR.....    | page | SI-172 |
| Compound <b>SI-25</b> $^{13}\text{C}$ NMR..... | page | SI-173 |
| Compound <b>SI-26</b> $^1\text{H}$ NMR.....    | page | SI-174 |
| Compound <b>SI-26</b> $^{13}\text{C}$ NMR..... | page | SI-175 |
| Compound <b>3'</b> $^1\text{H}$ NMR.....       | page | SI-176 |
| Compound <b>3'</b> $^{13}\text{C}$ NMR.....    | page | SI-177 |
| Compound <b>3'</b> HSQC .....                  | page | SI-178 |

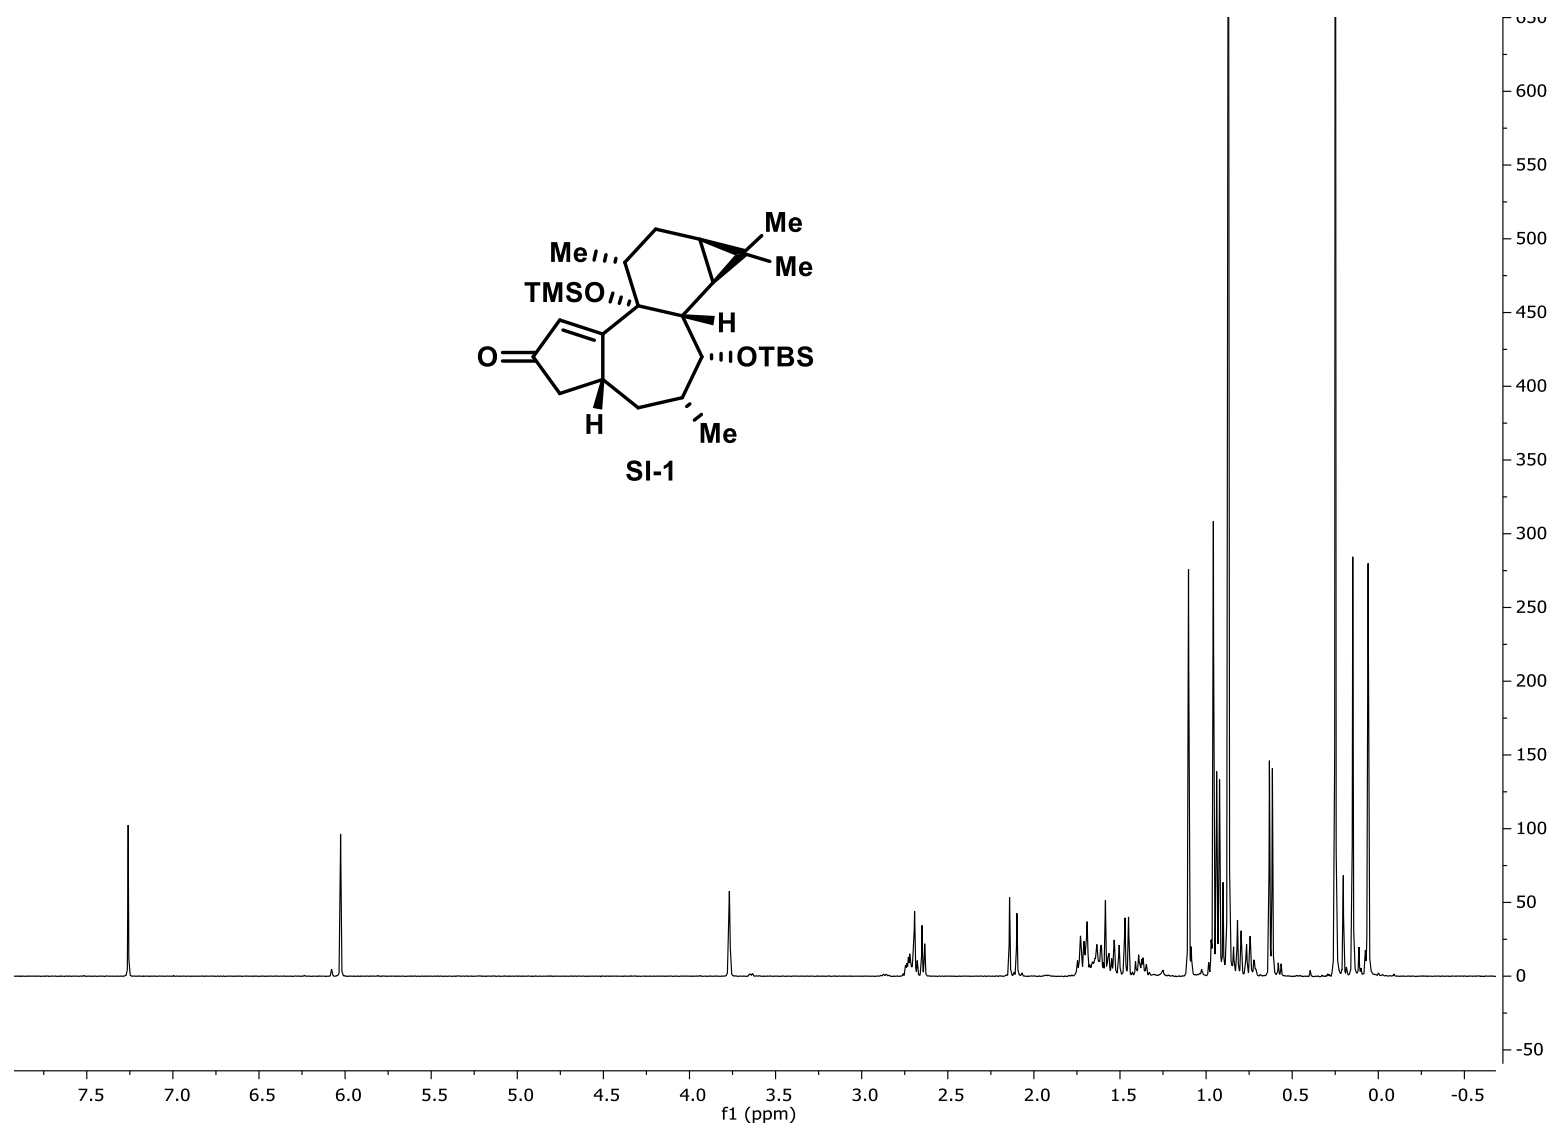

SI-77

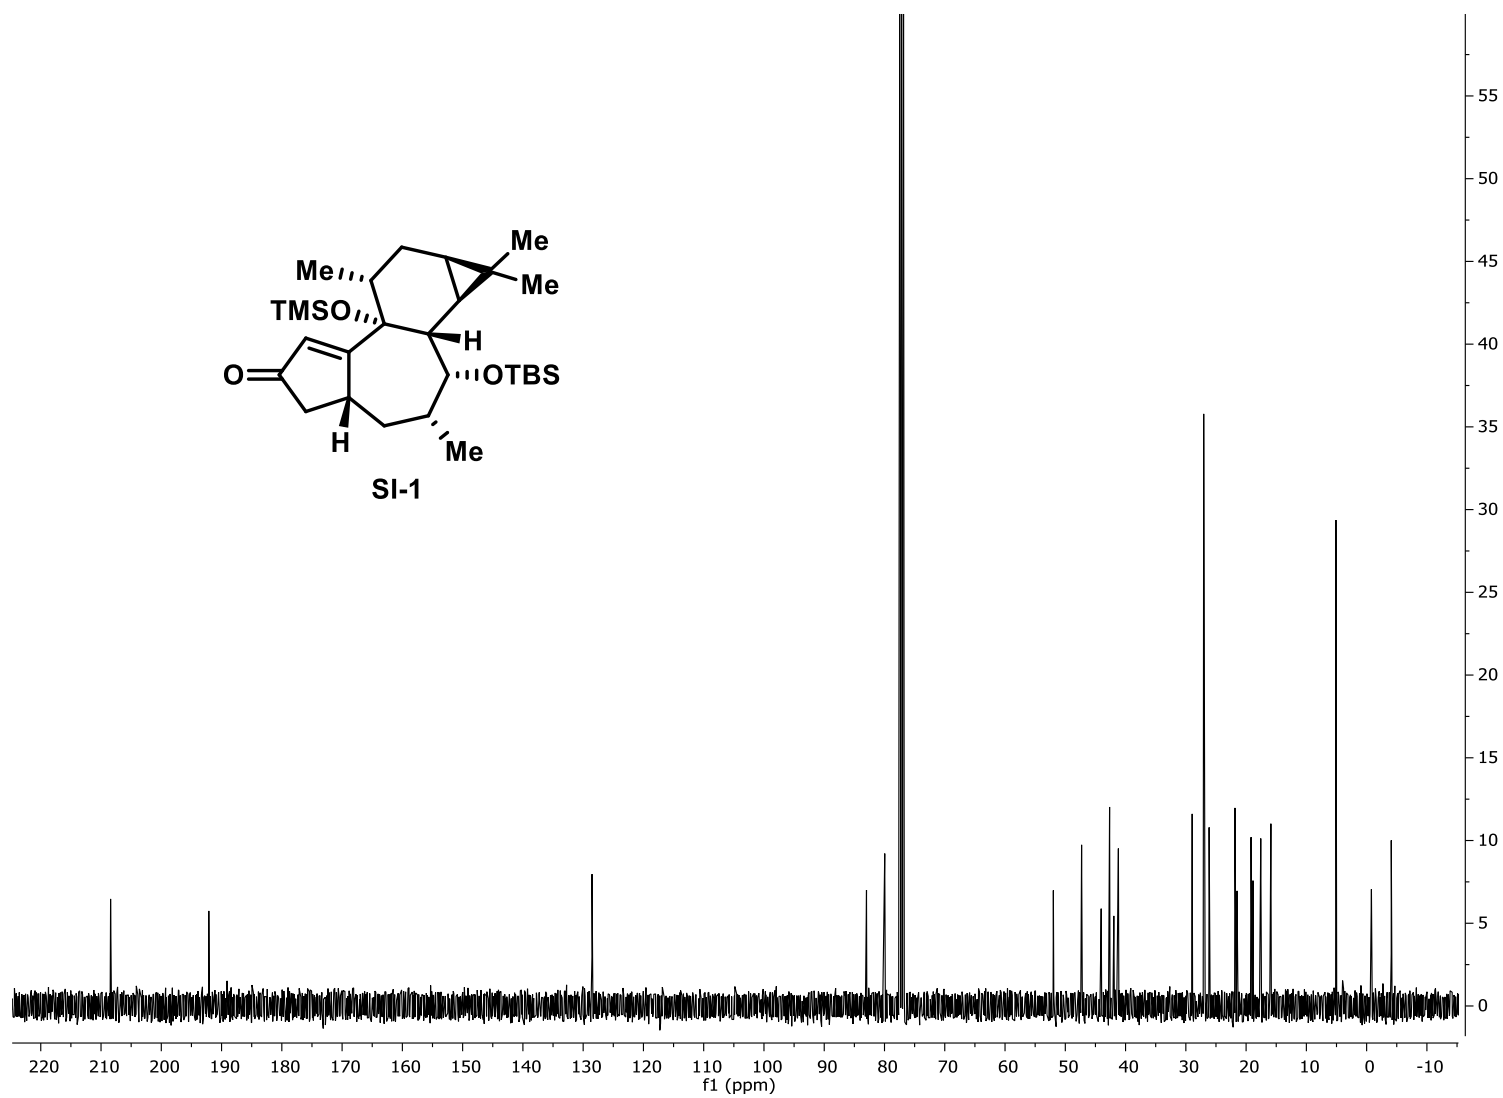

SI-78



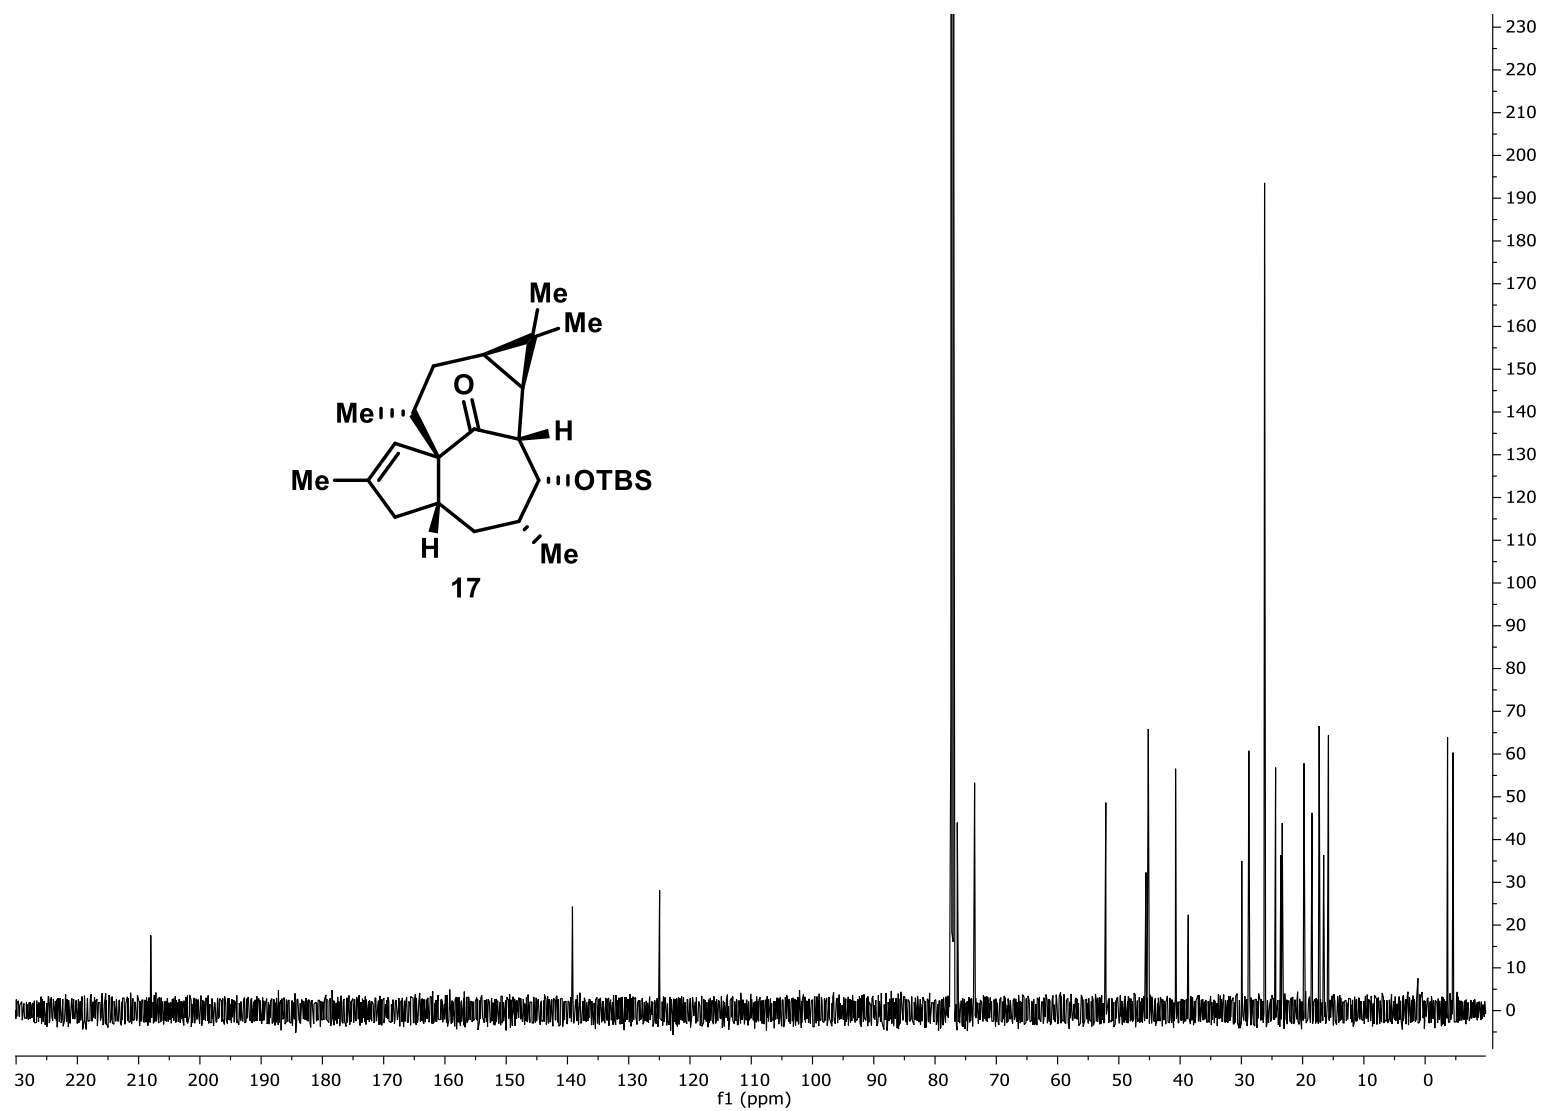

SI-80

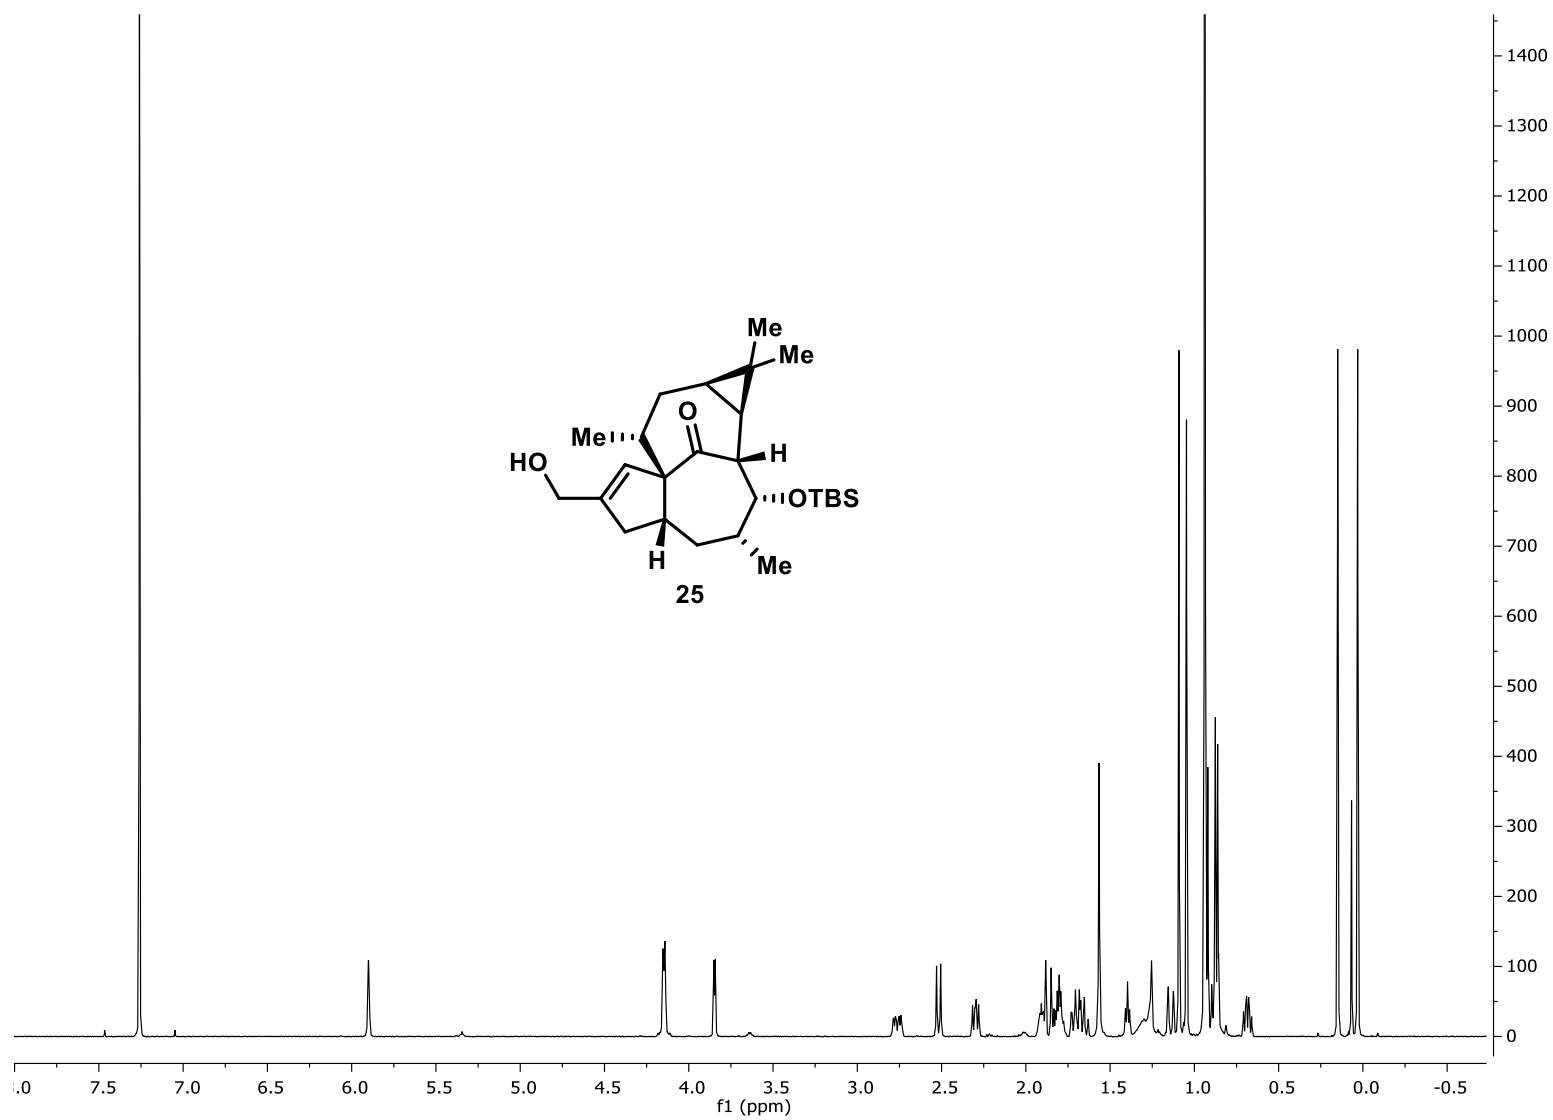

SI-81

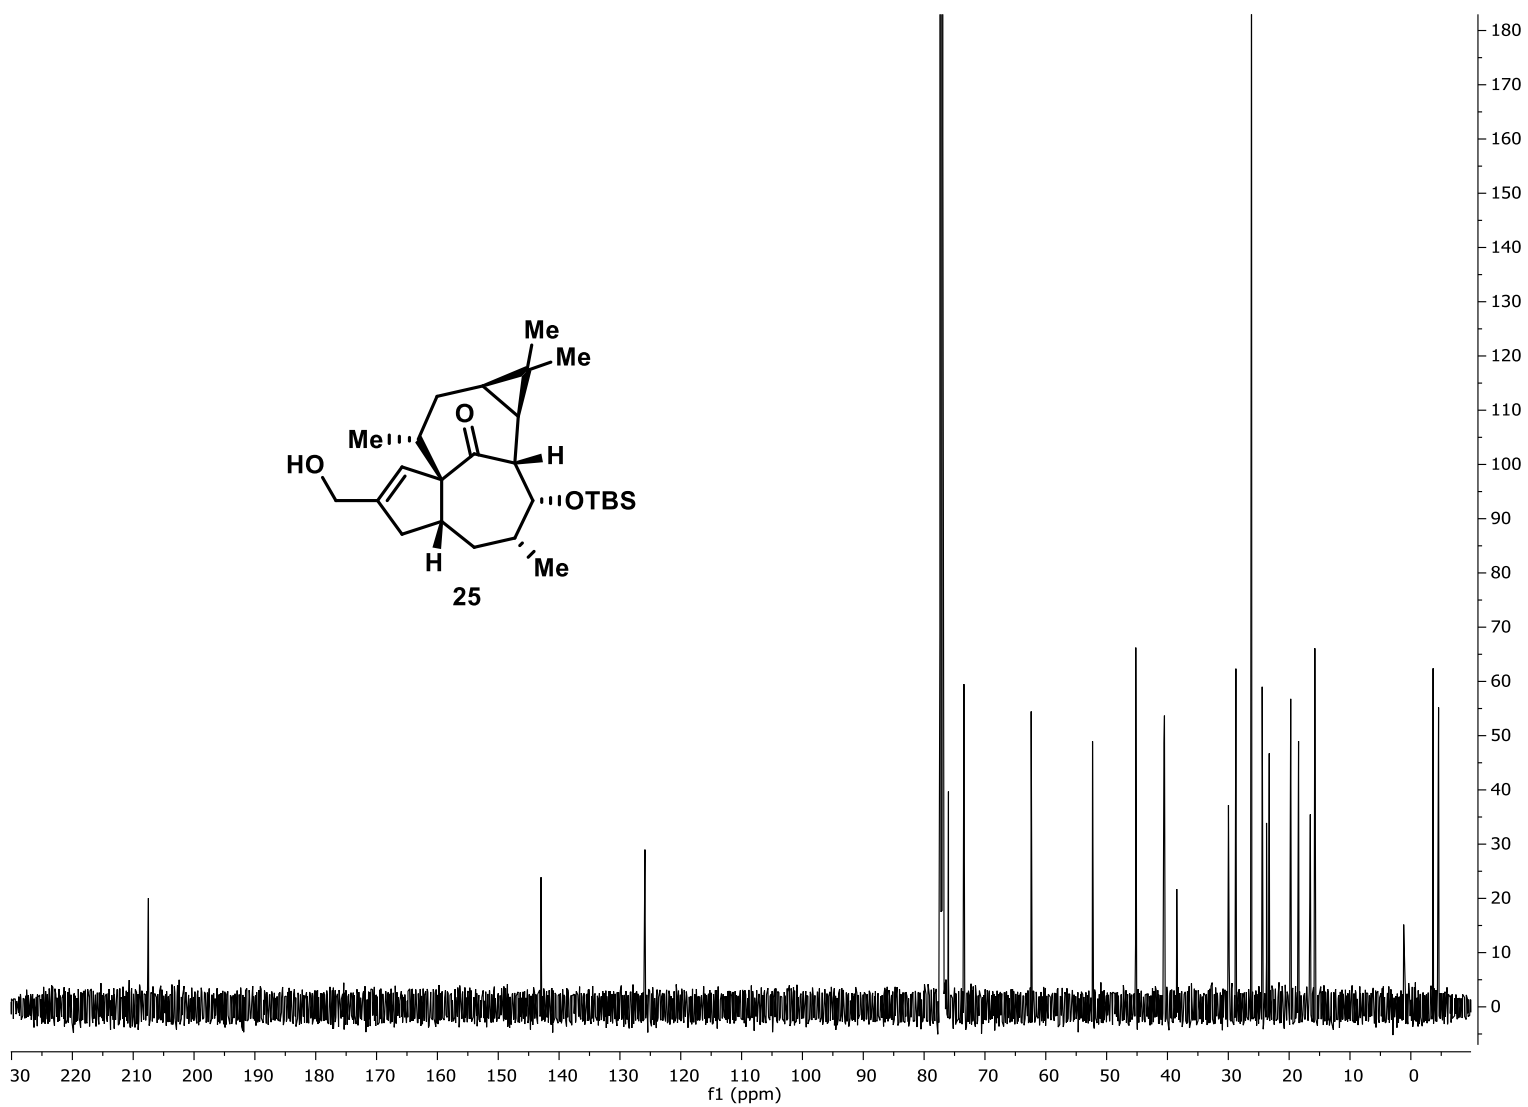

SI-82

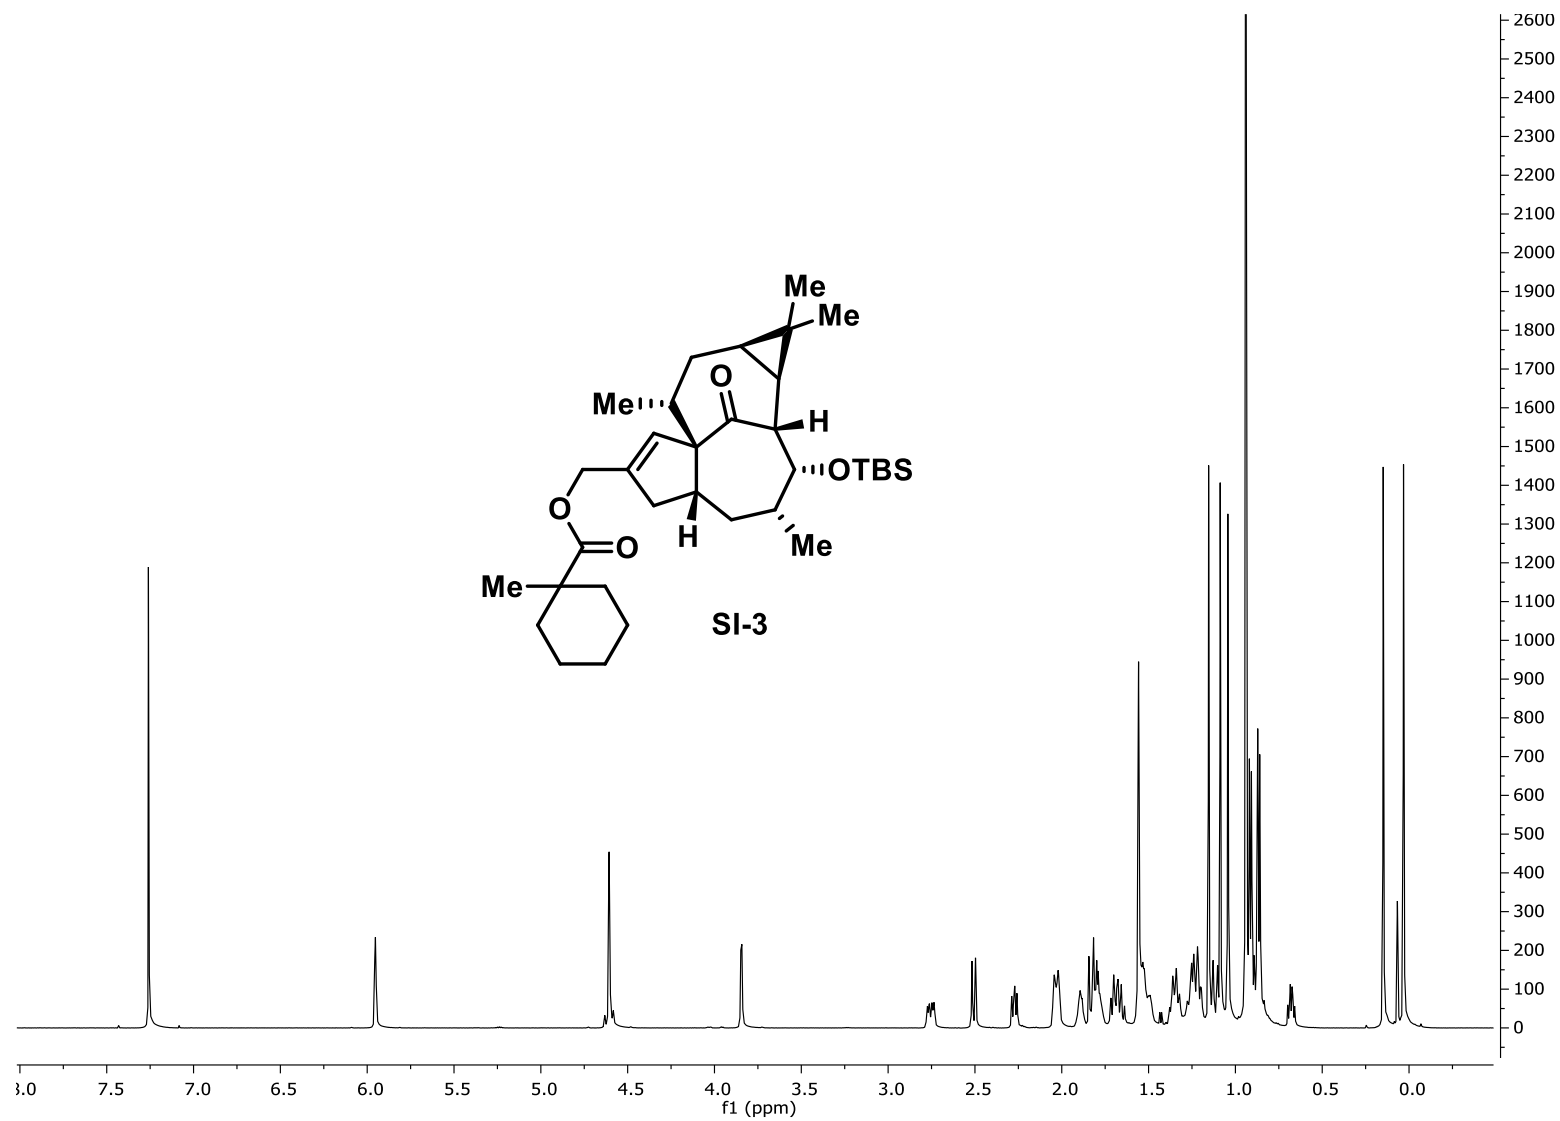

SI-83

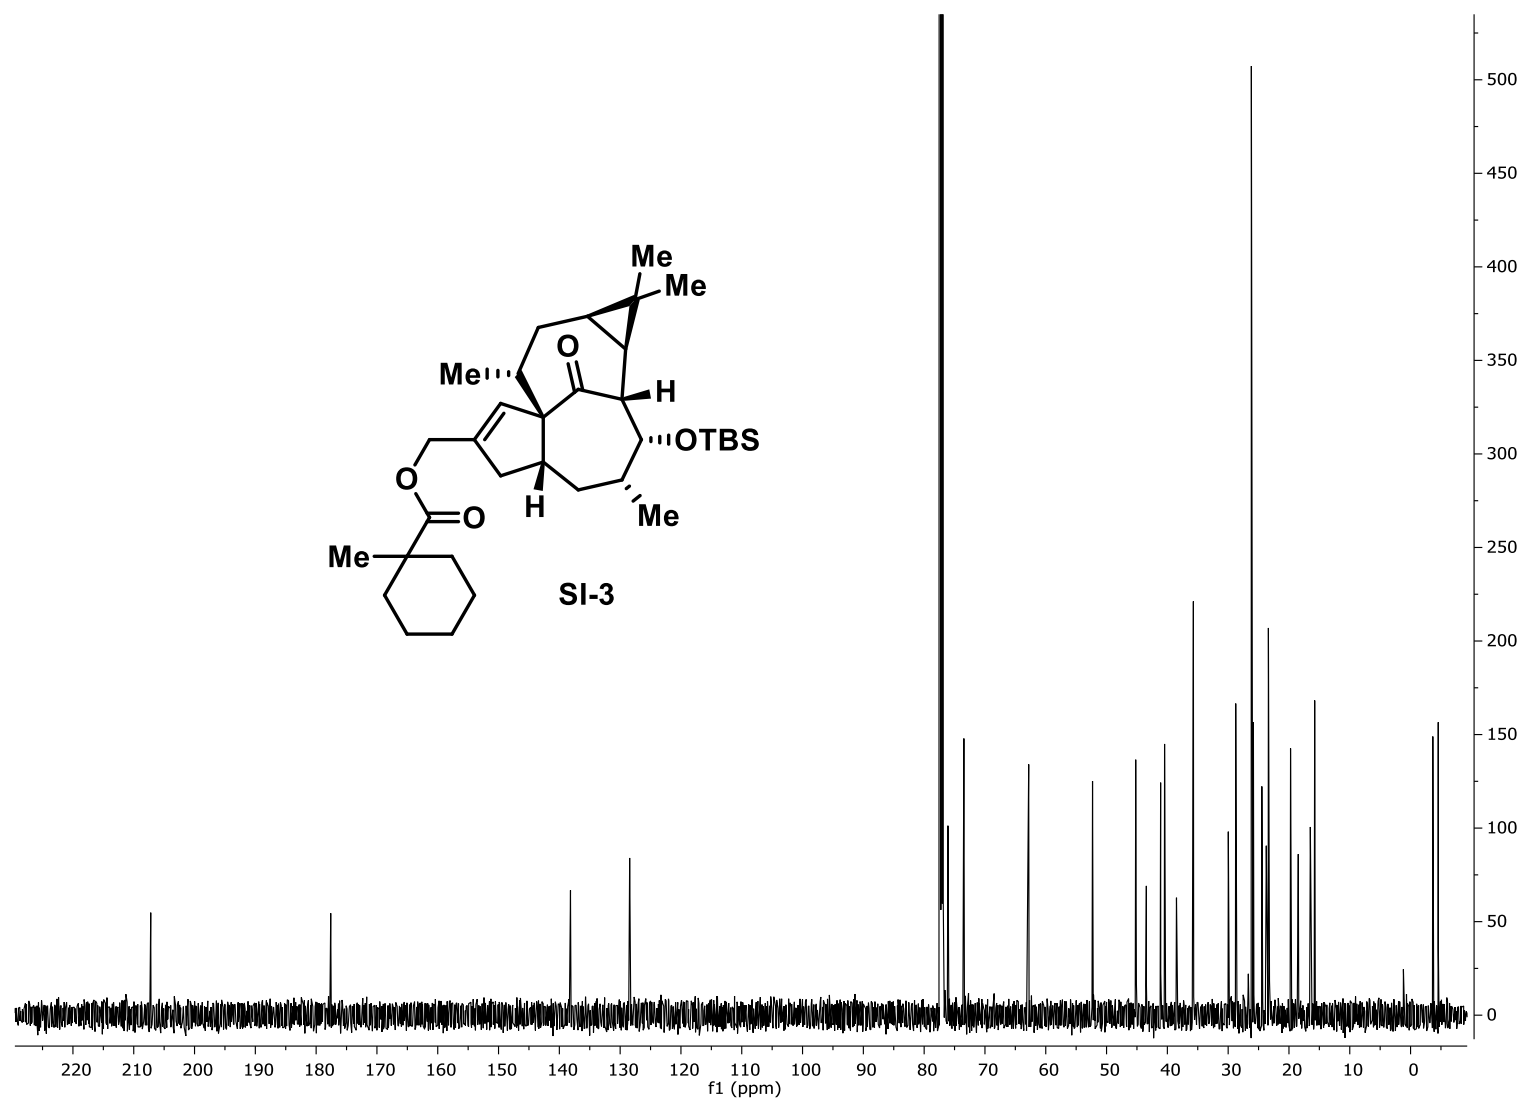

SI-84

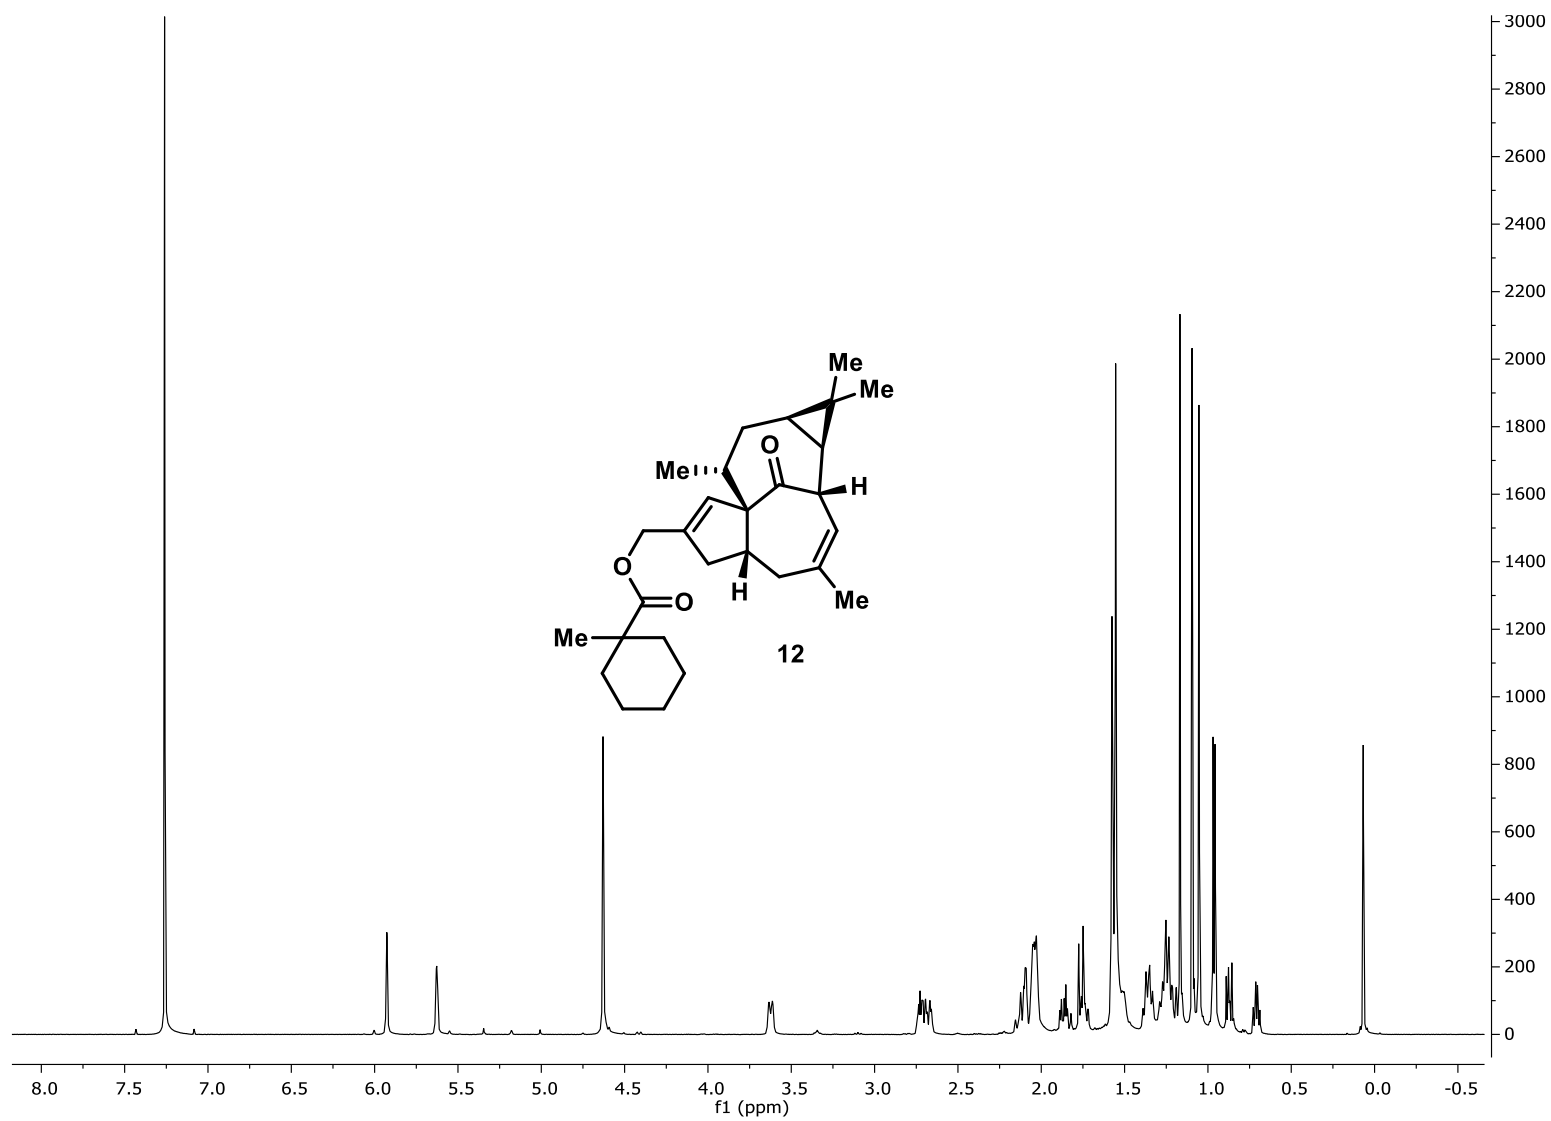

SI-85

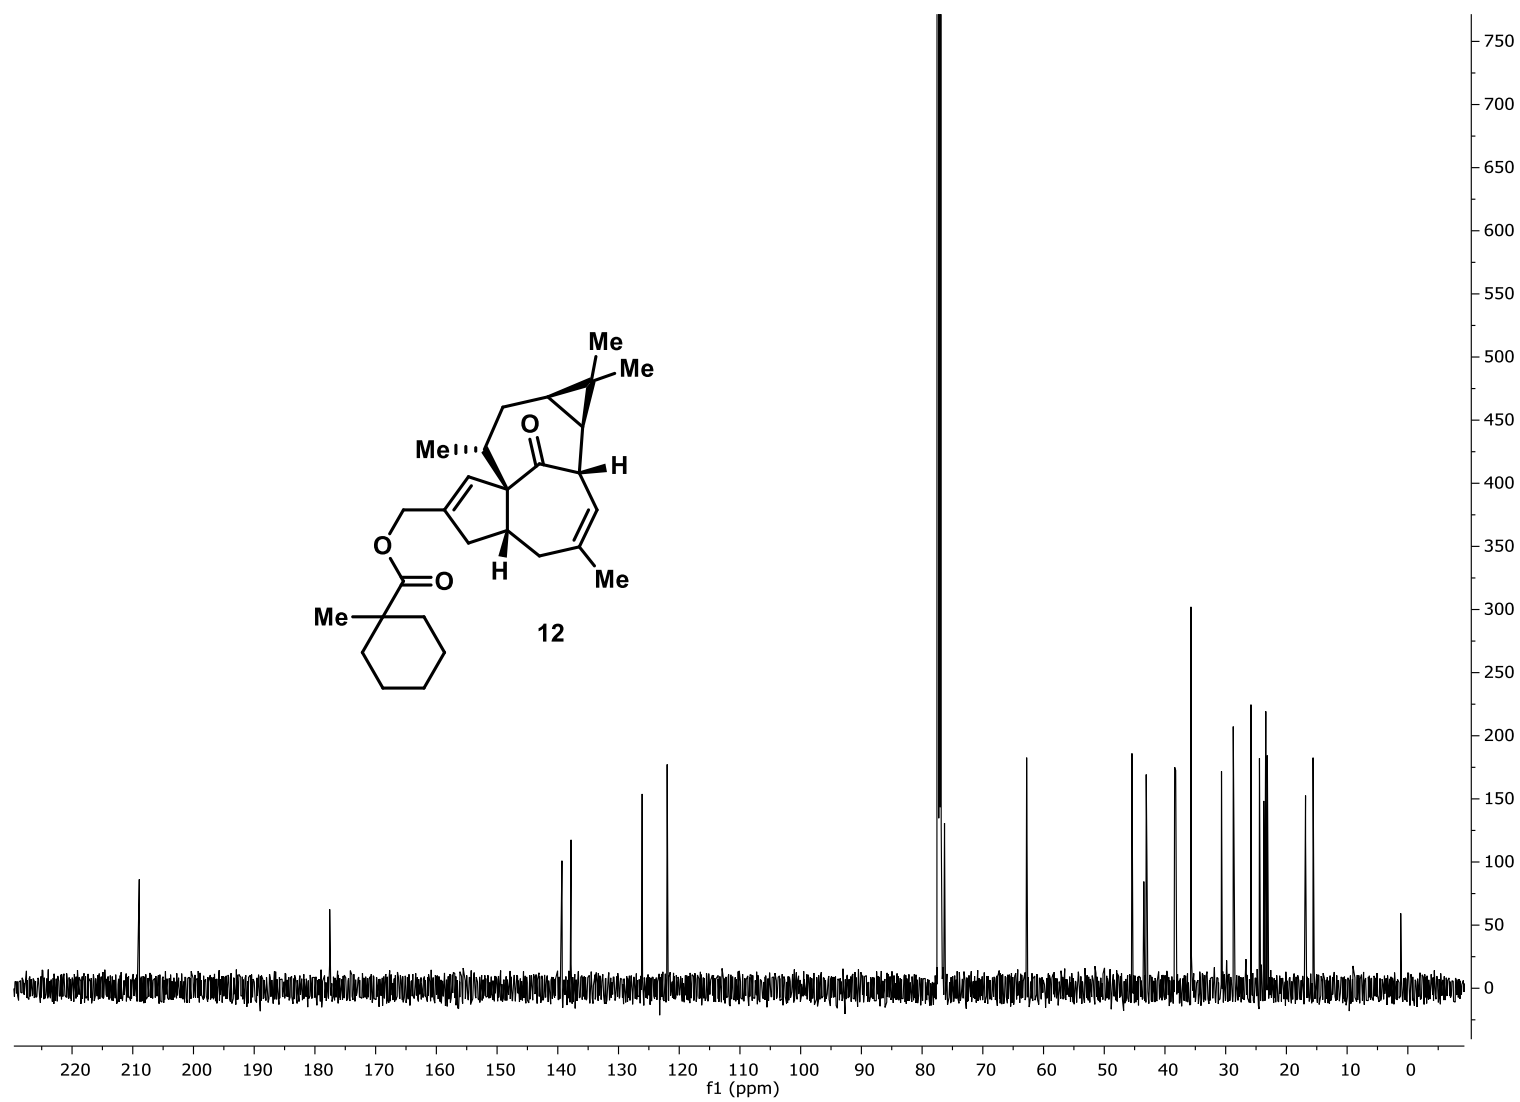

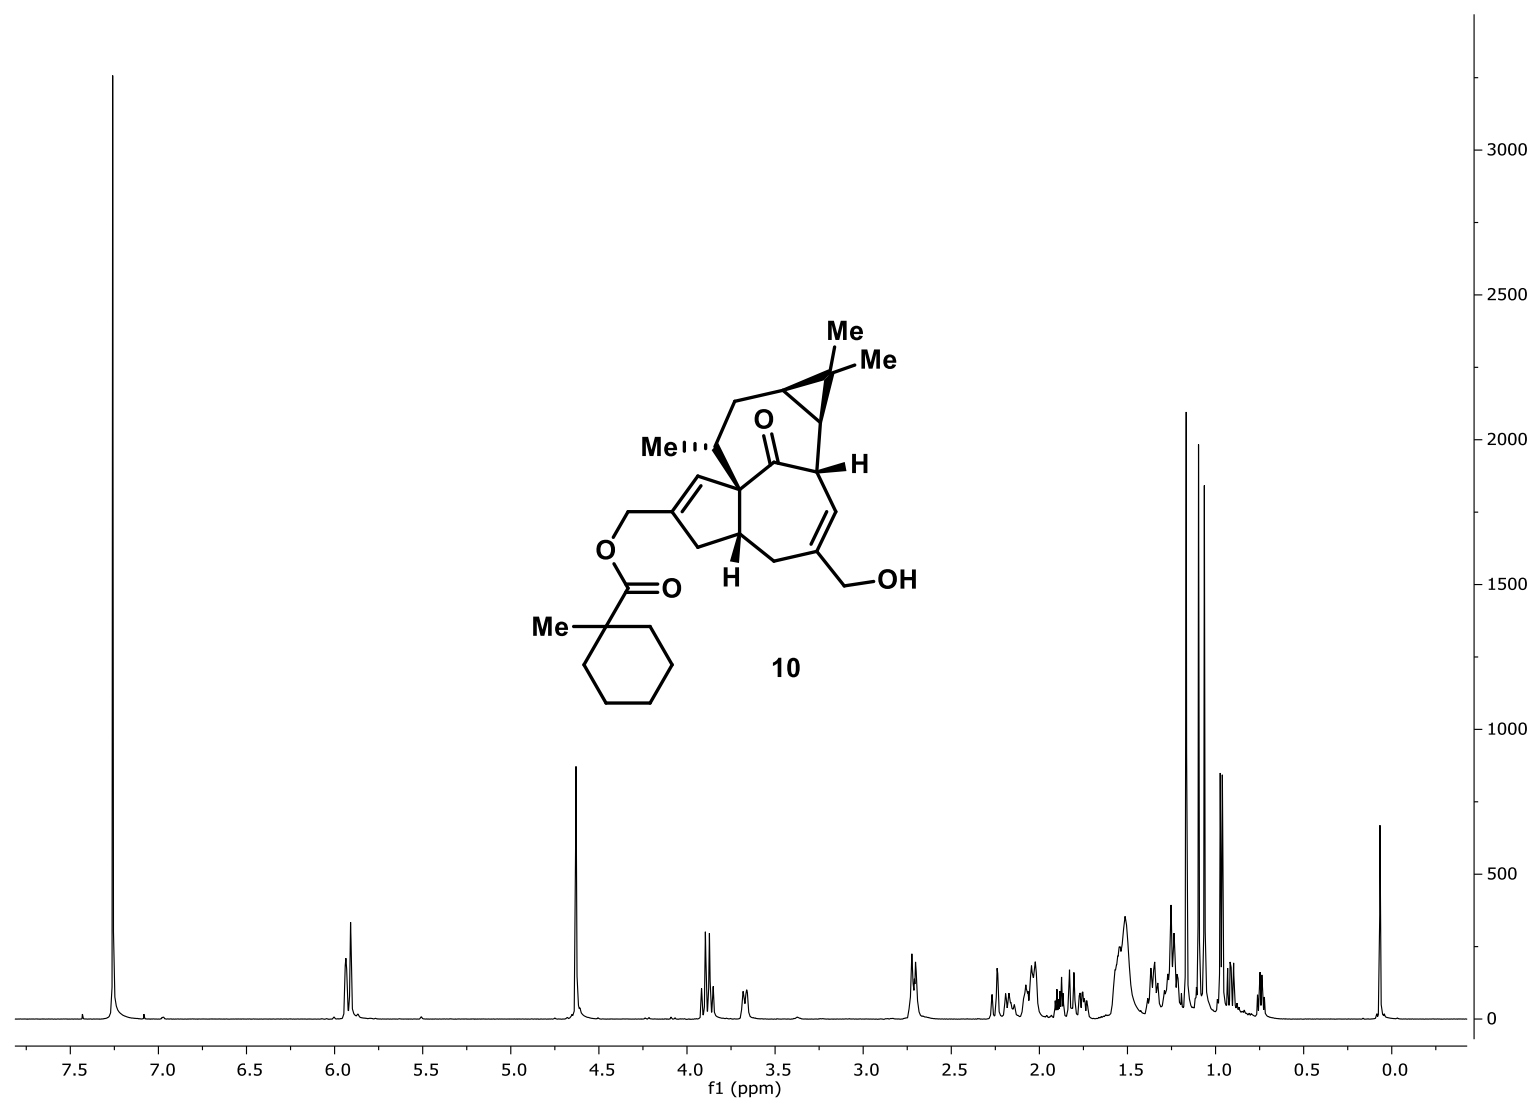

SI-87

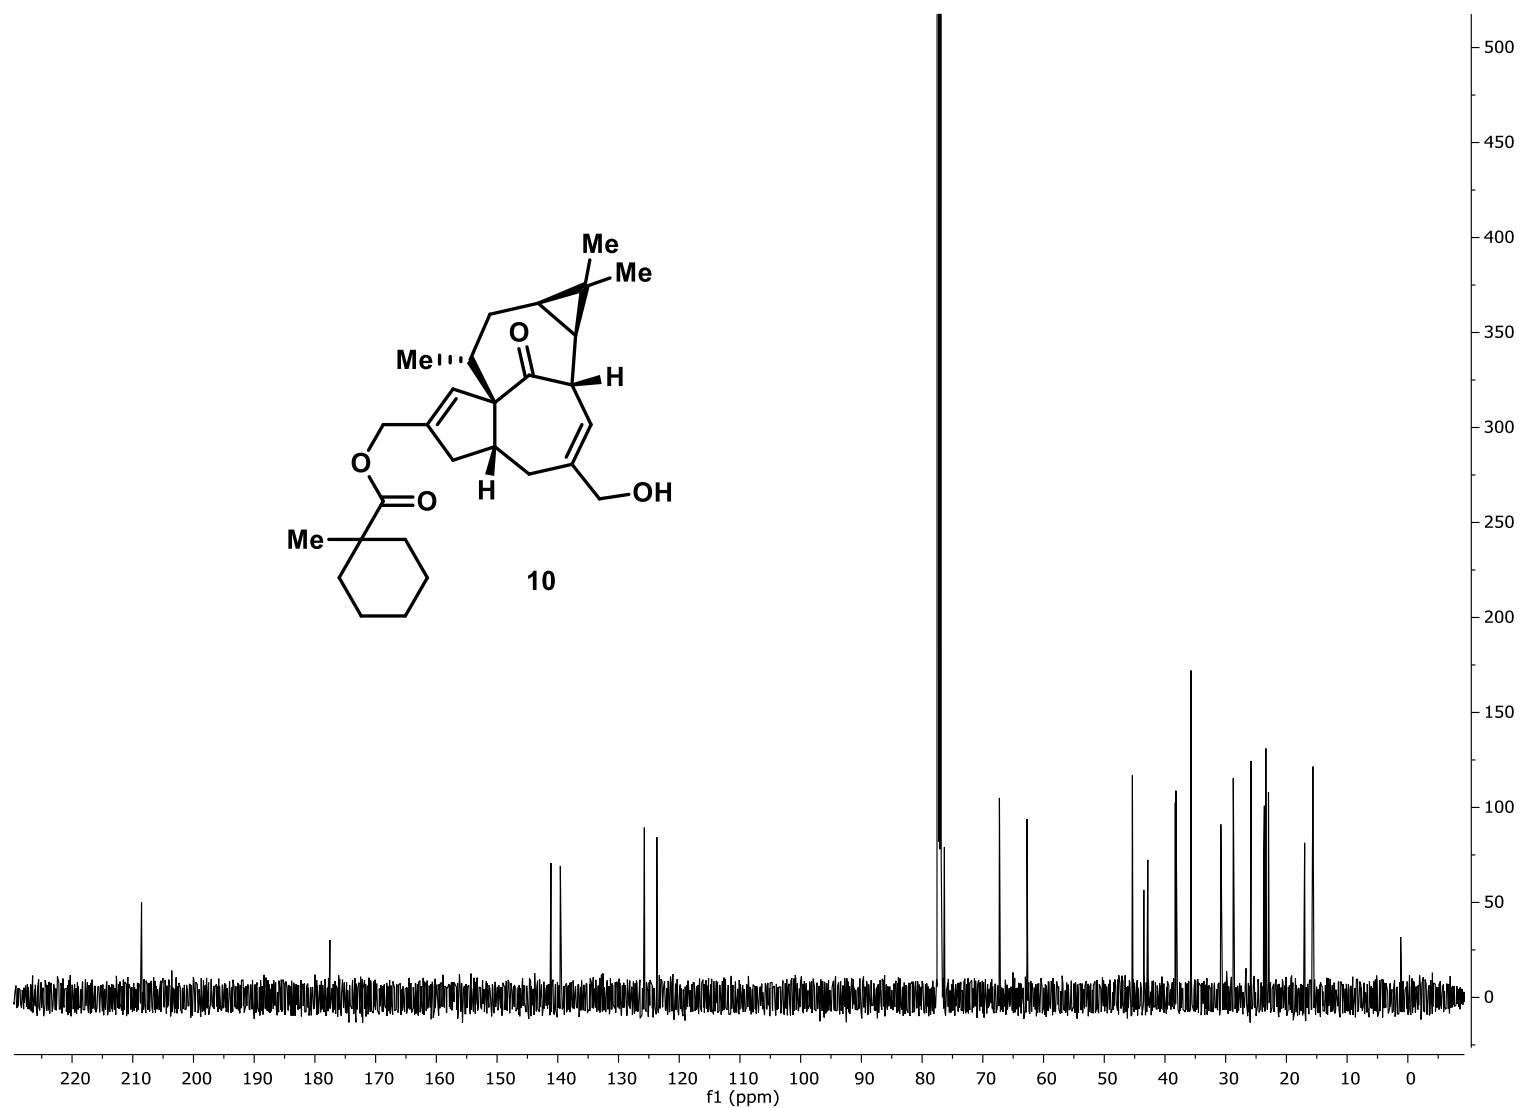

SI-88

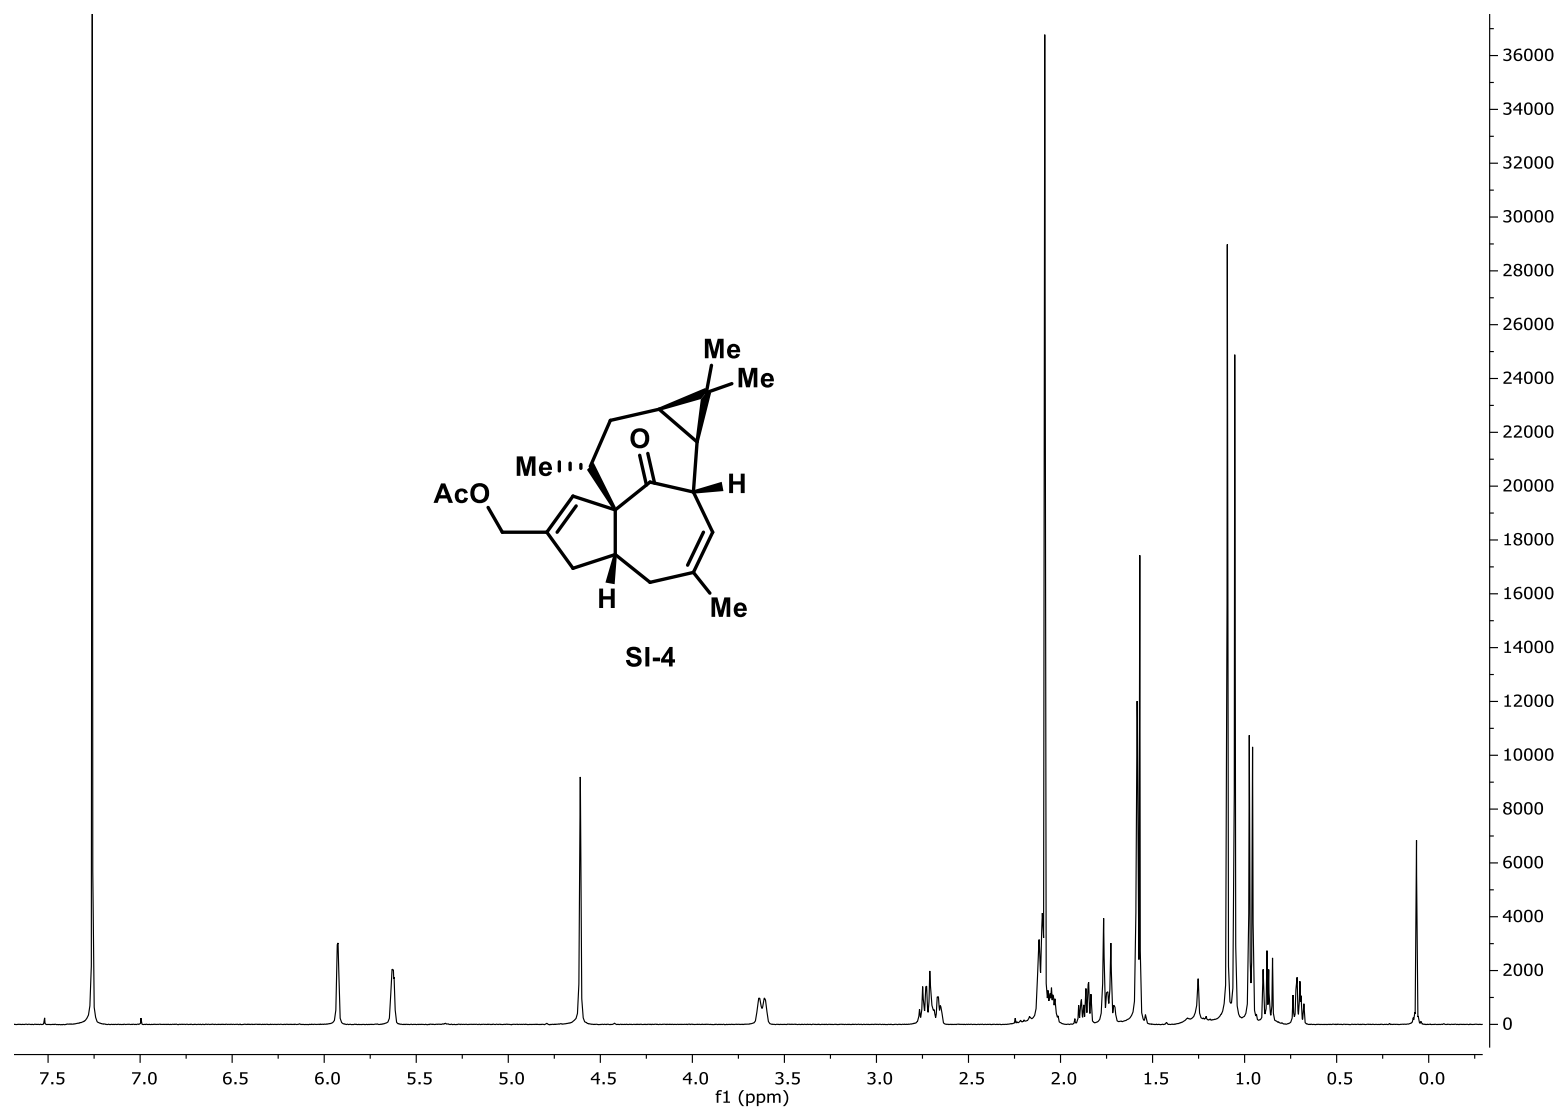

SI-89

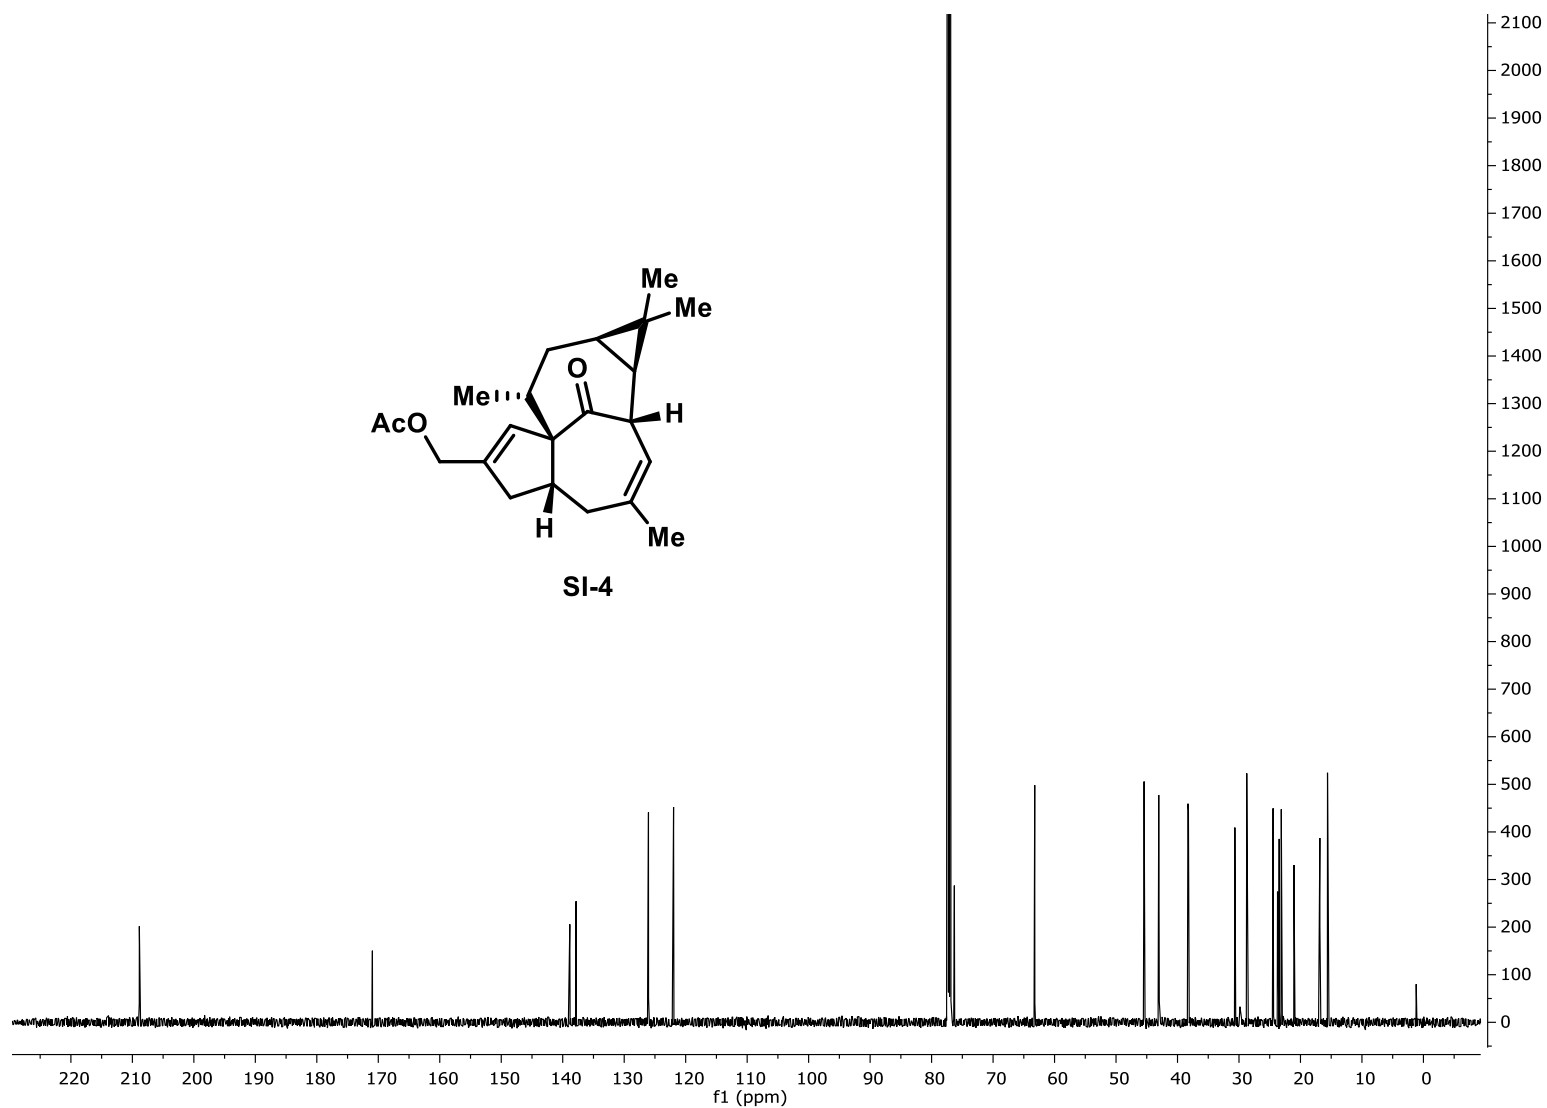

SI-90

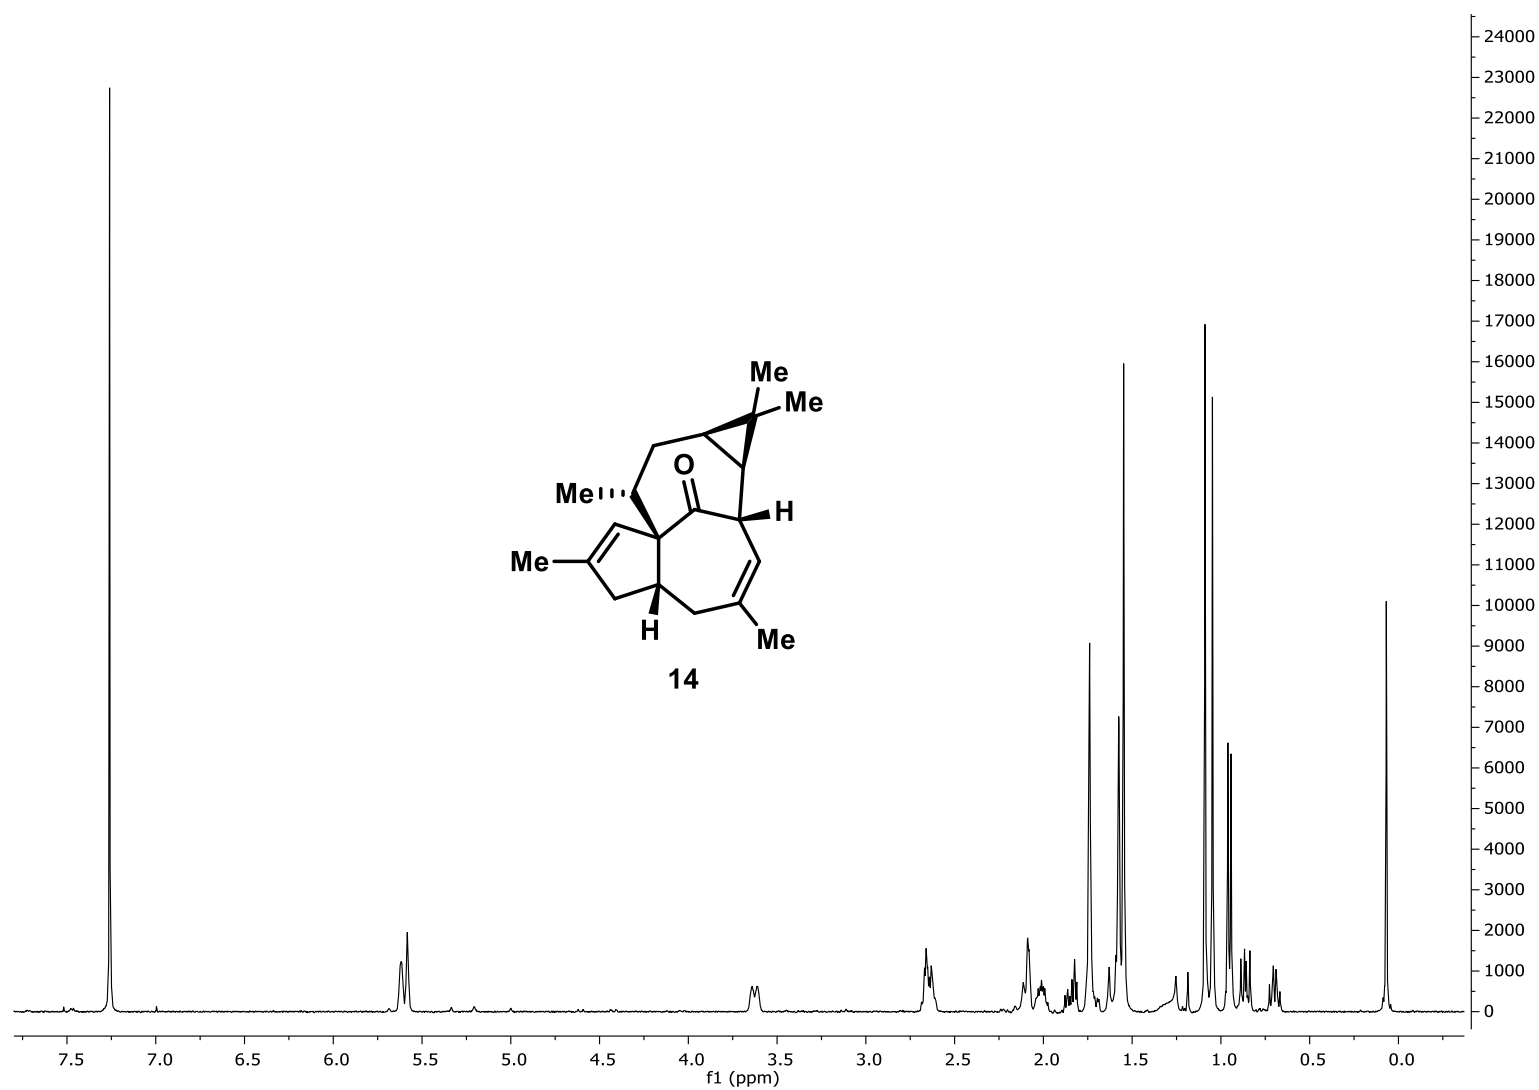

SI-91

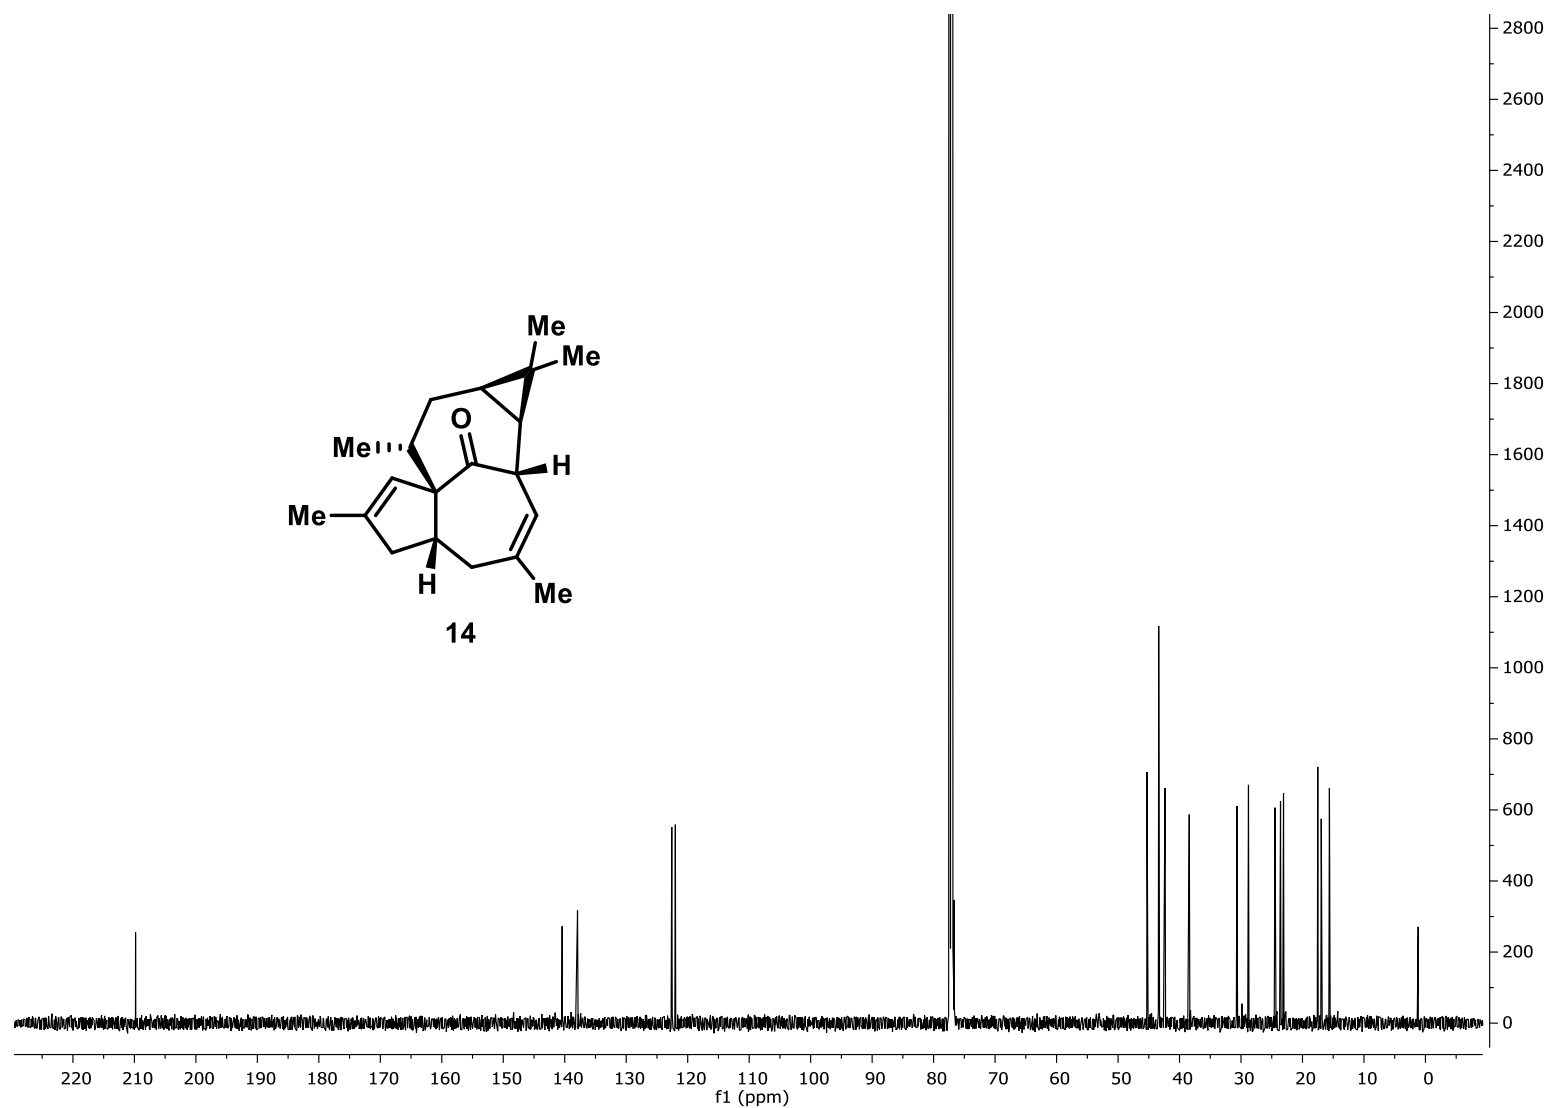

SI-92

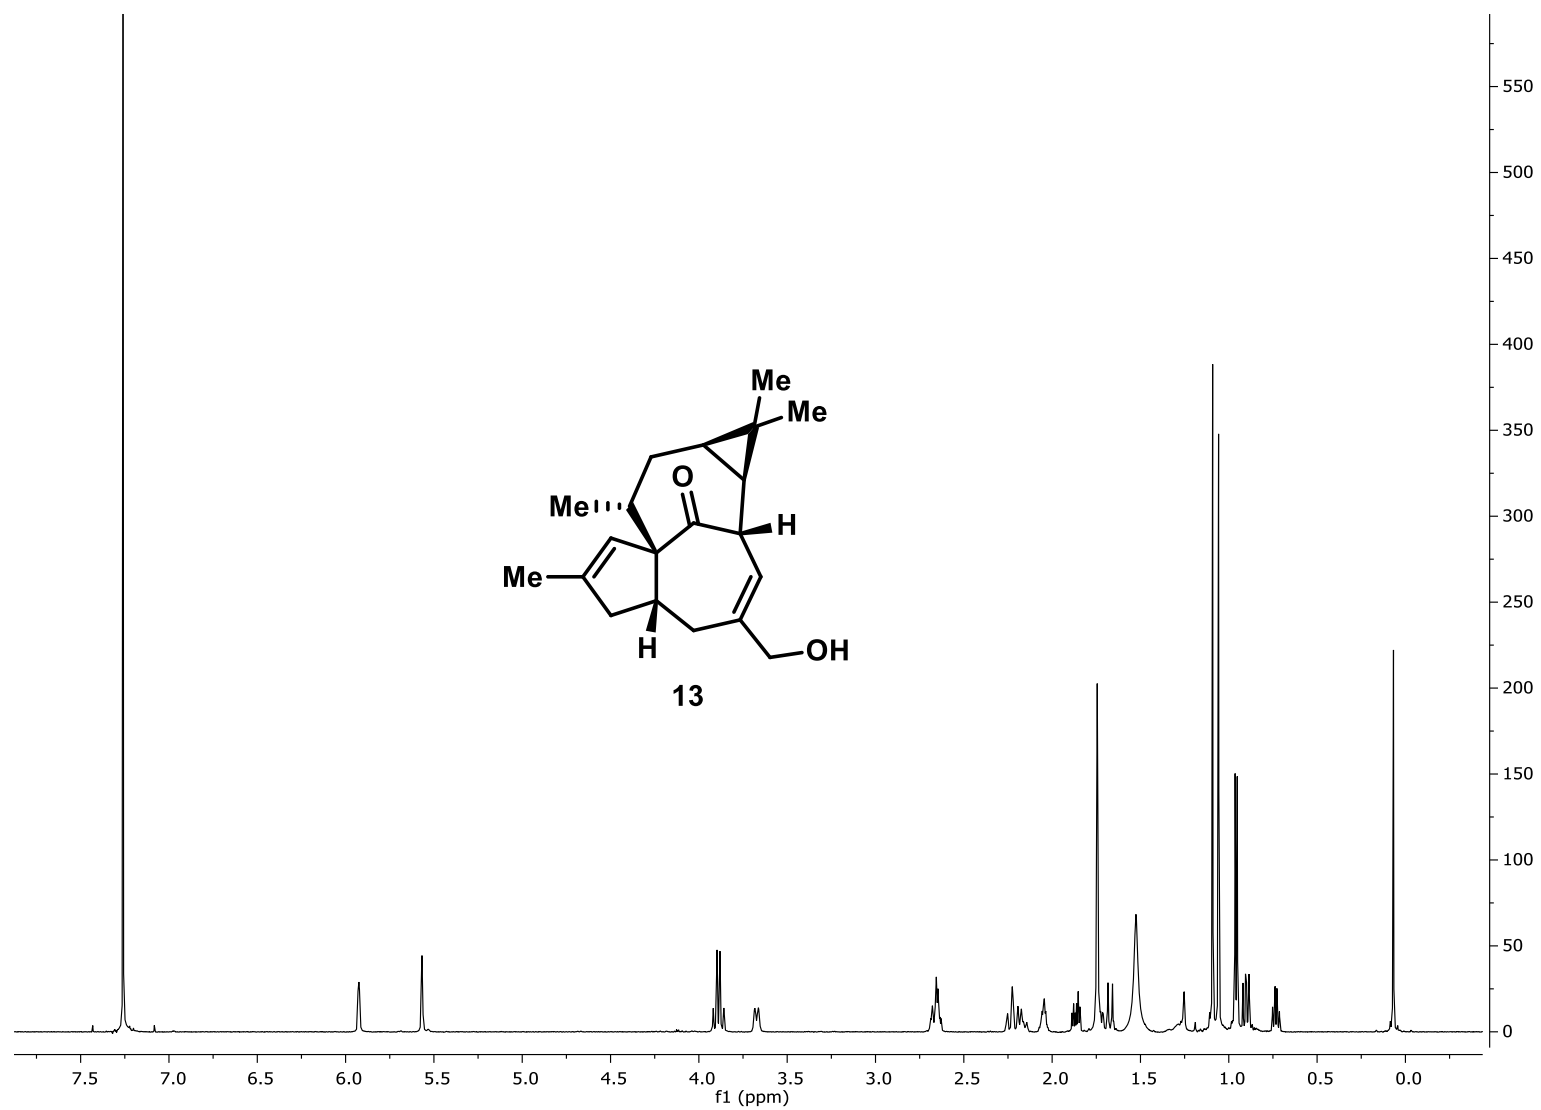

SI-93

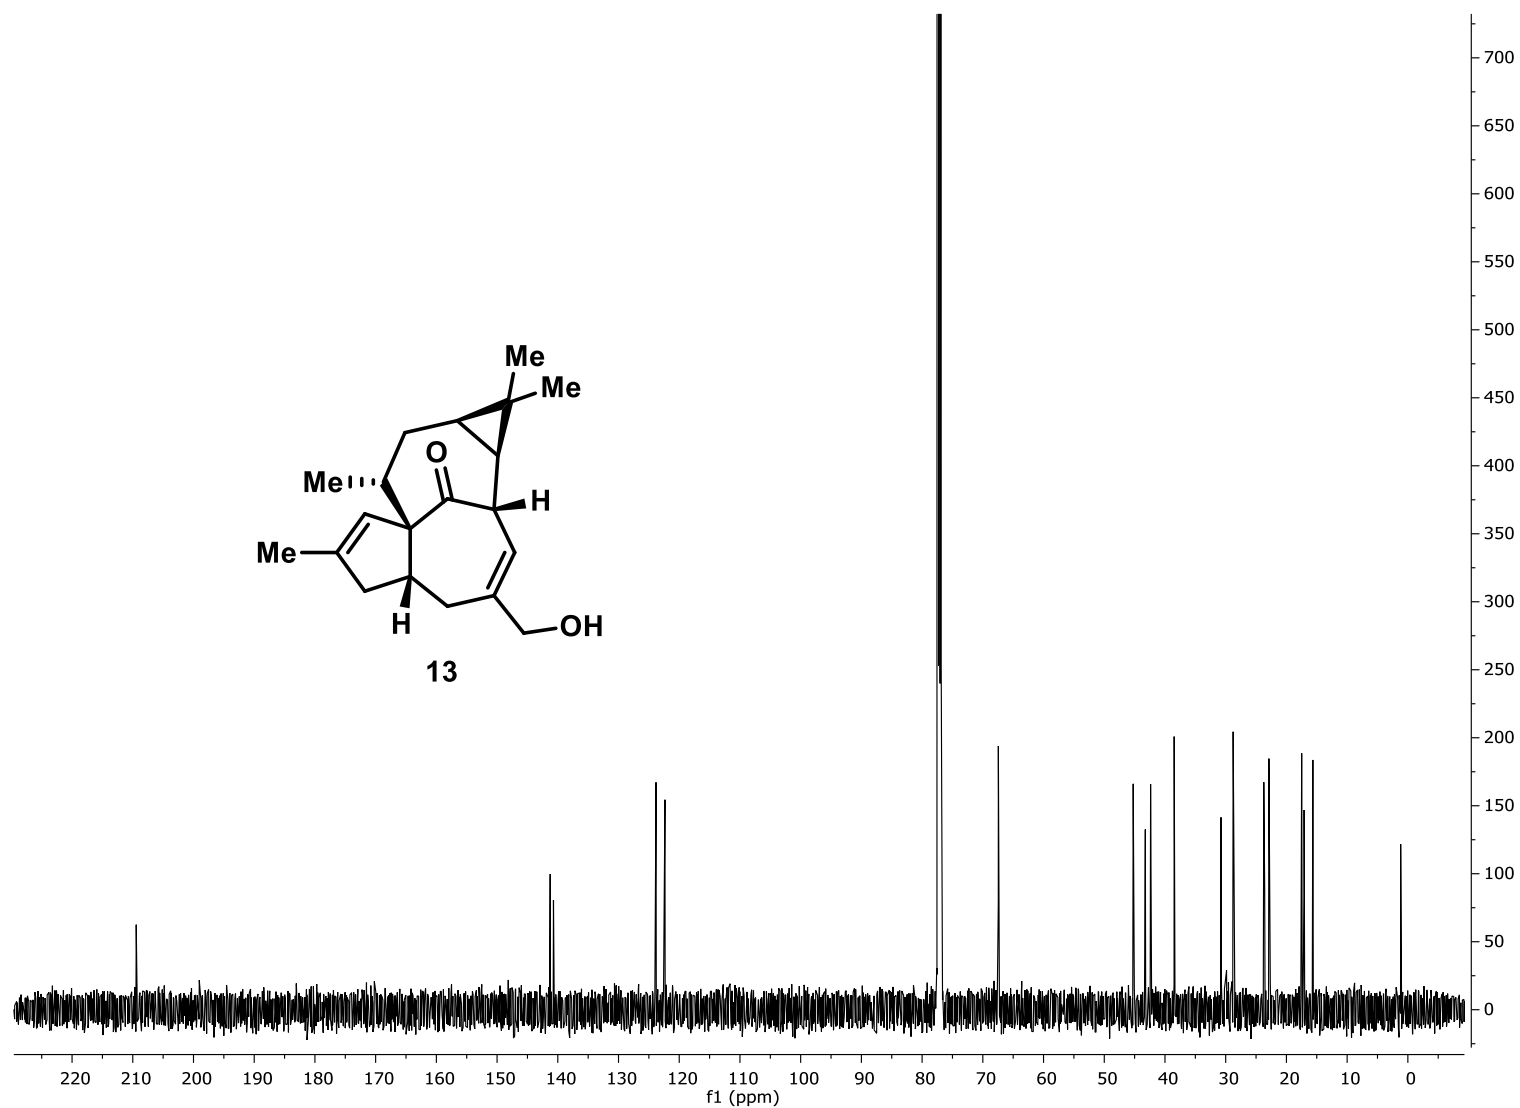

# 2D NOESY

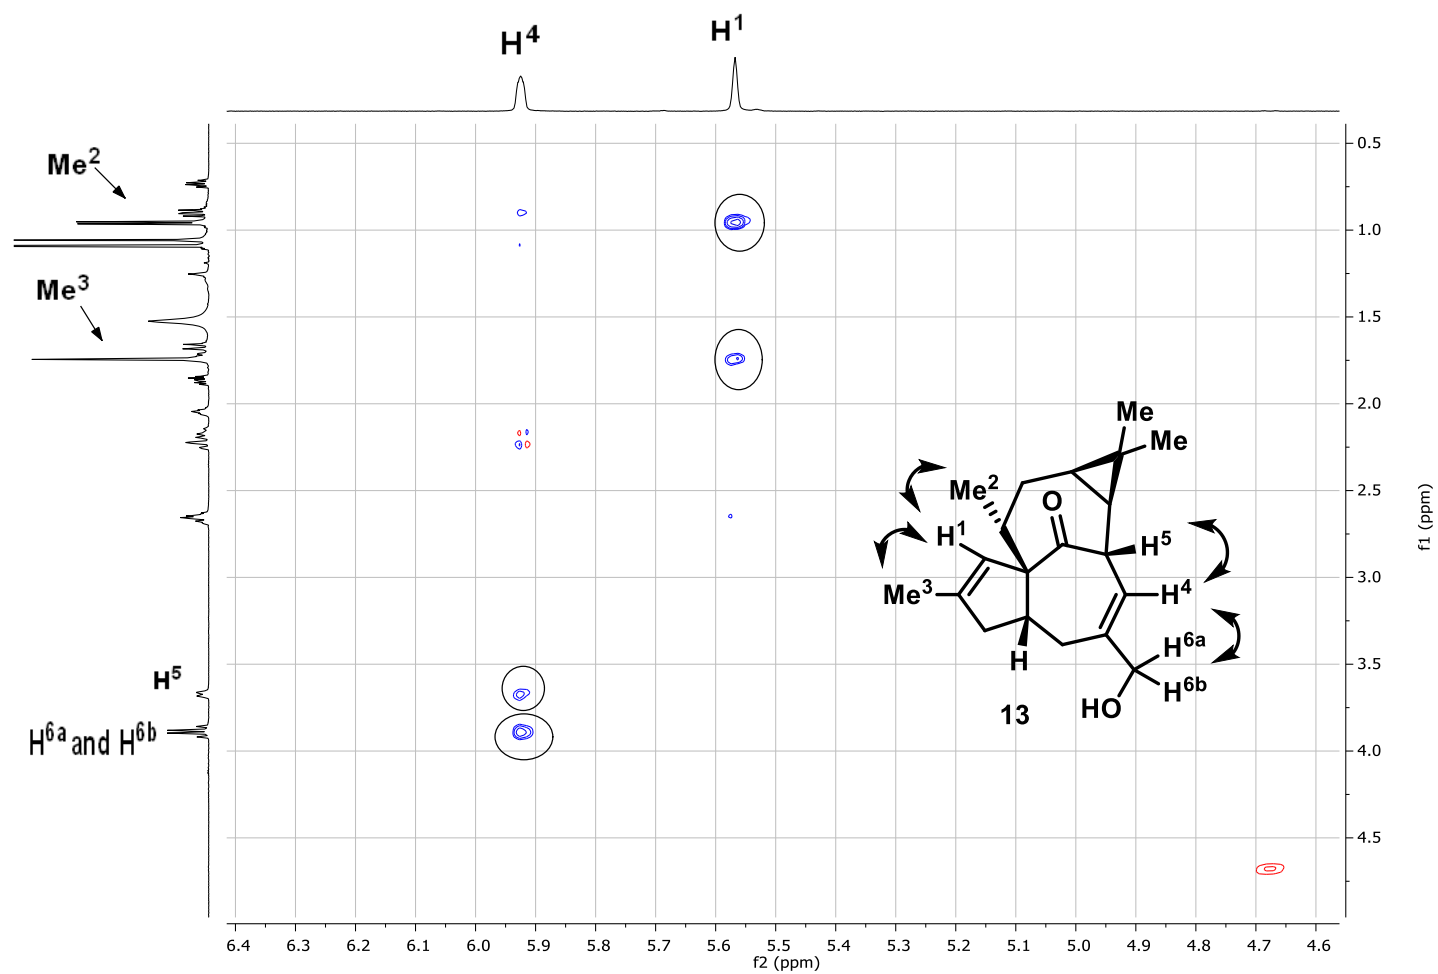

SI-95

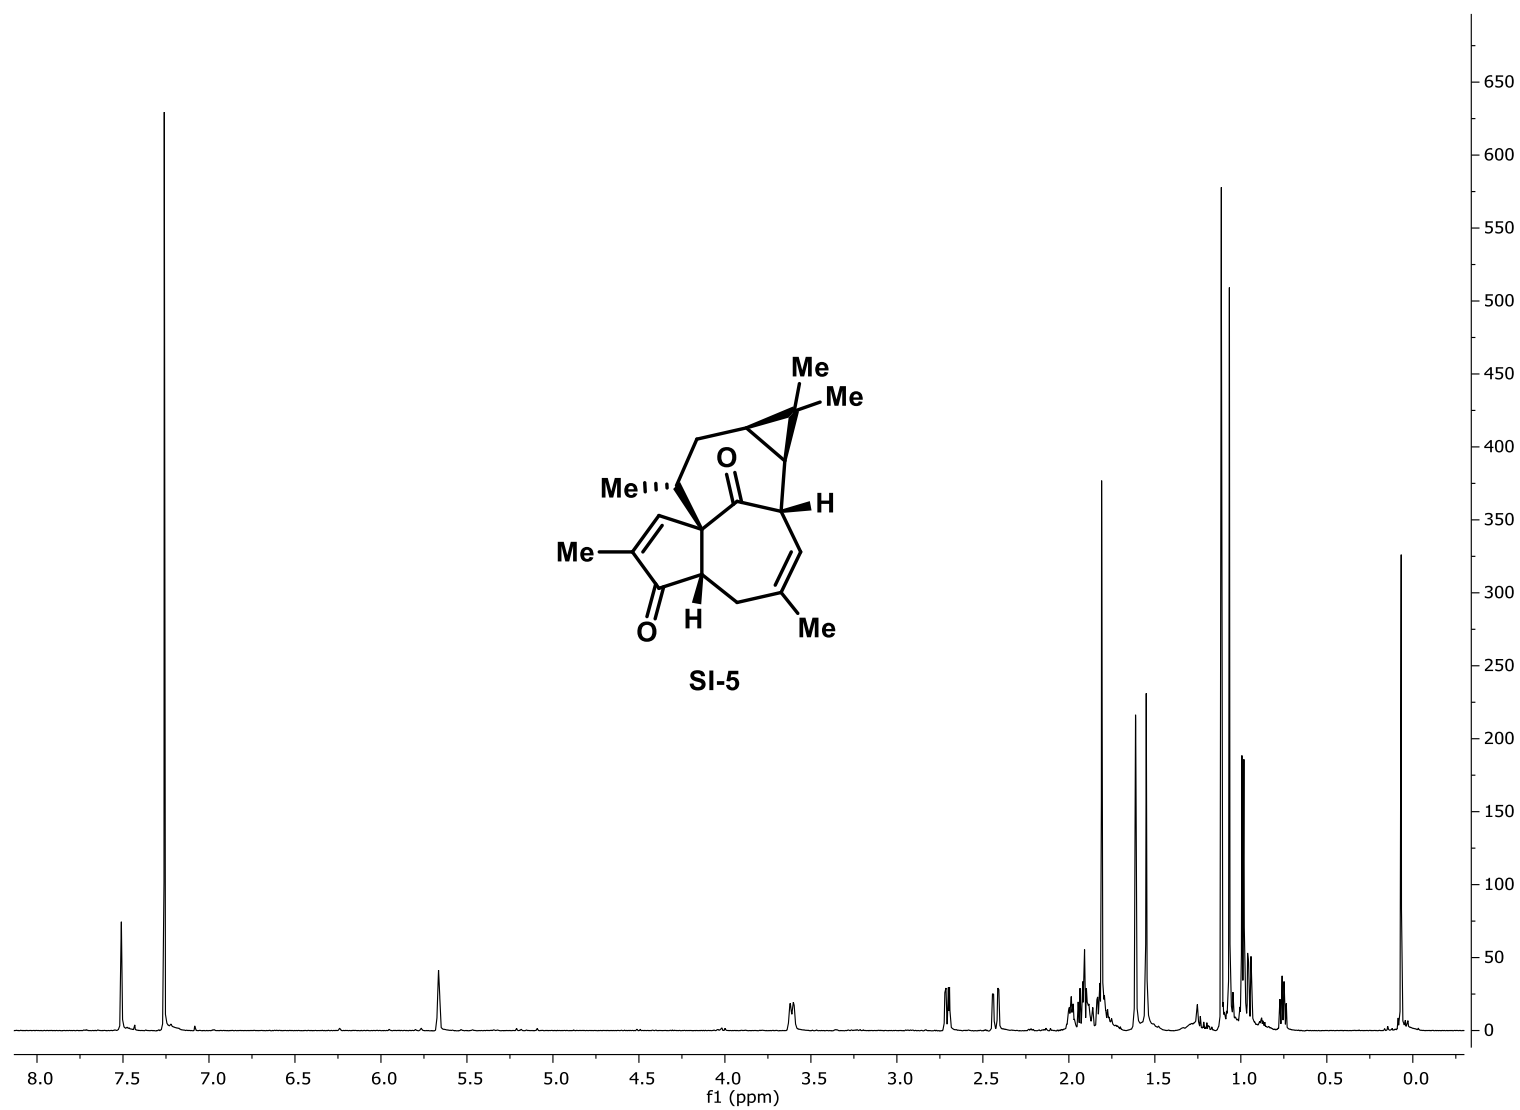

SI-96

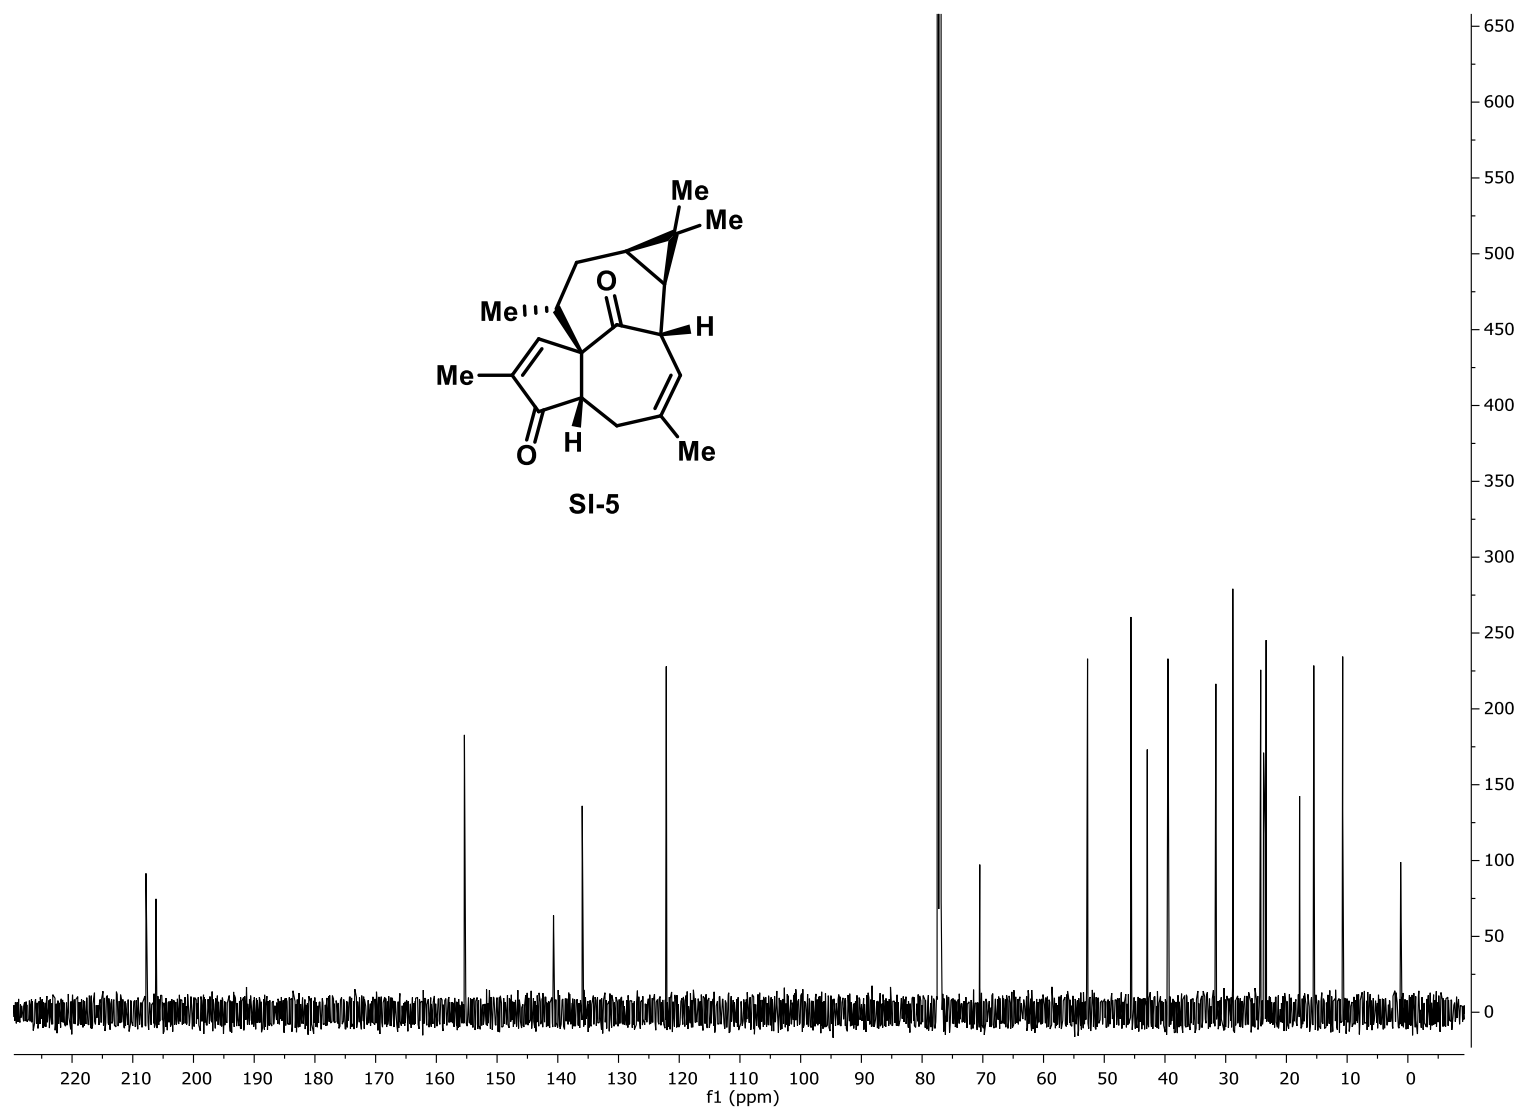

SI-97

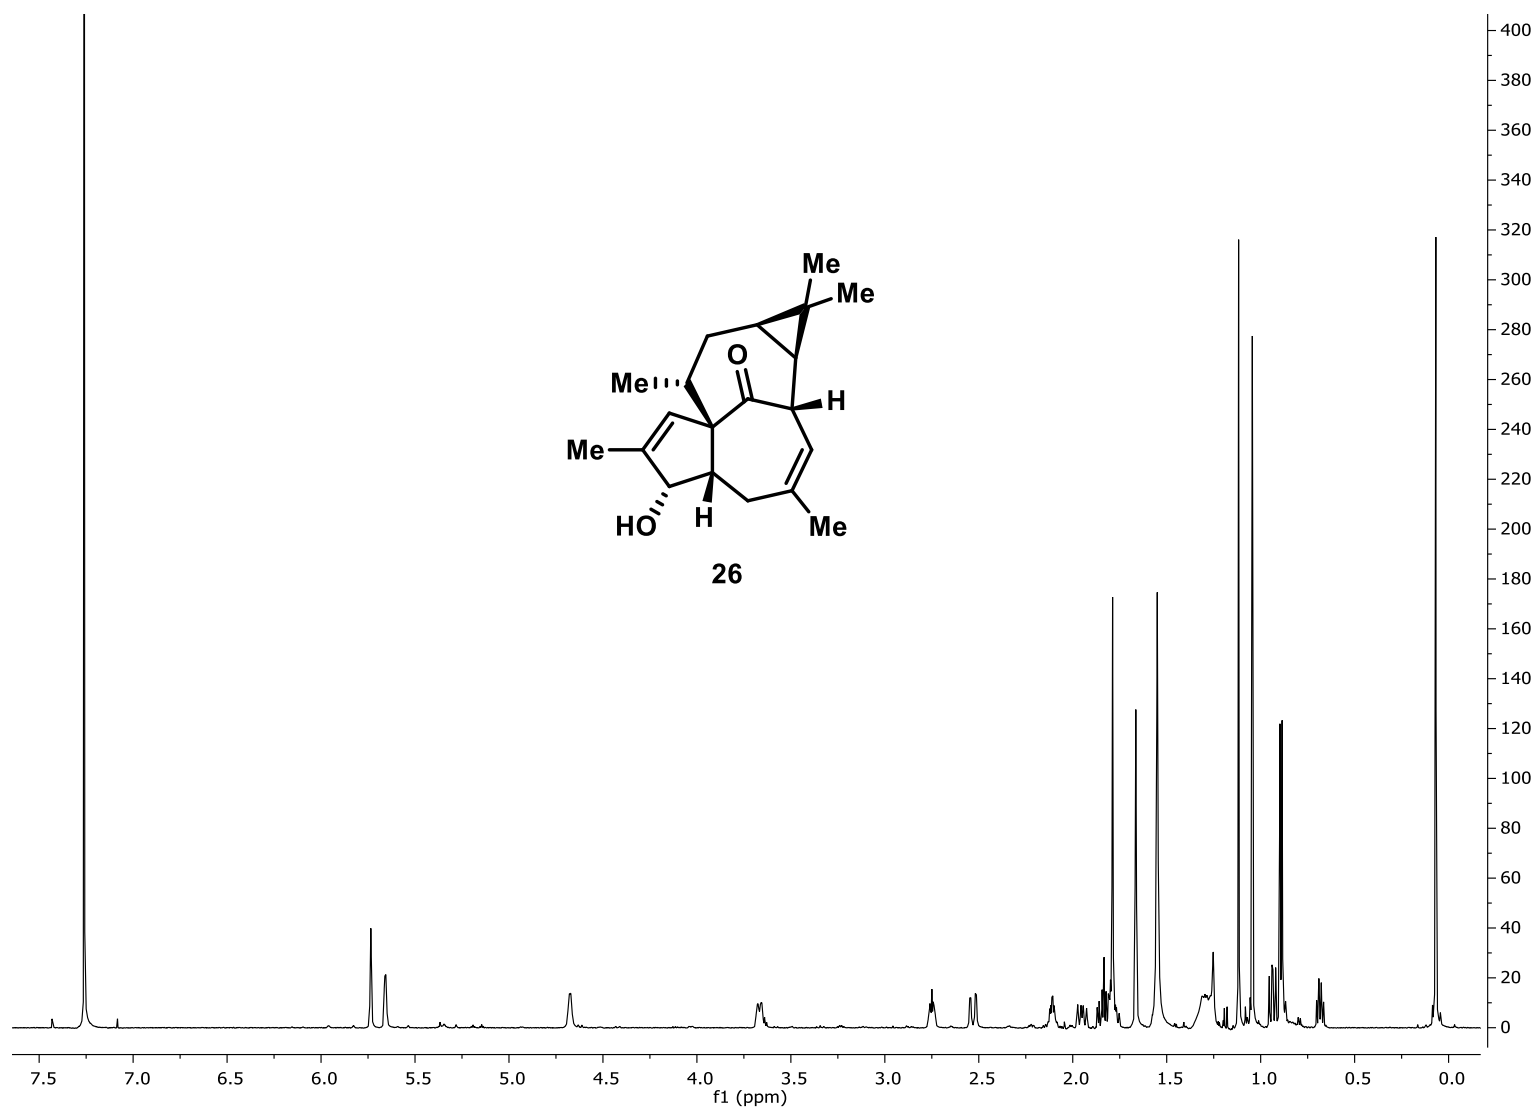

SI-98

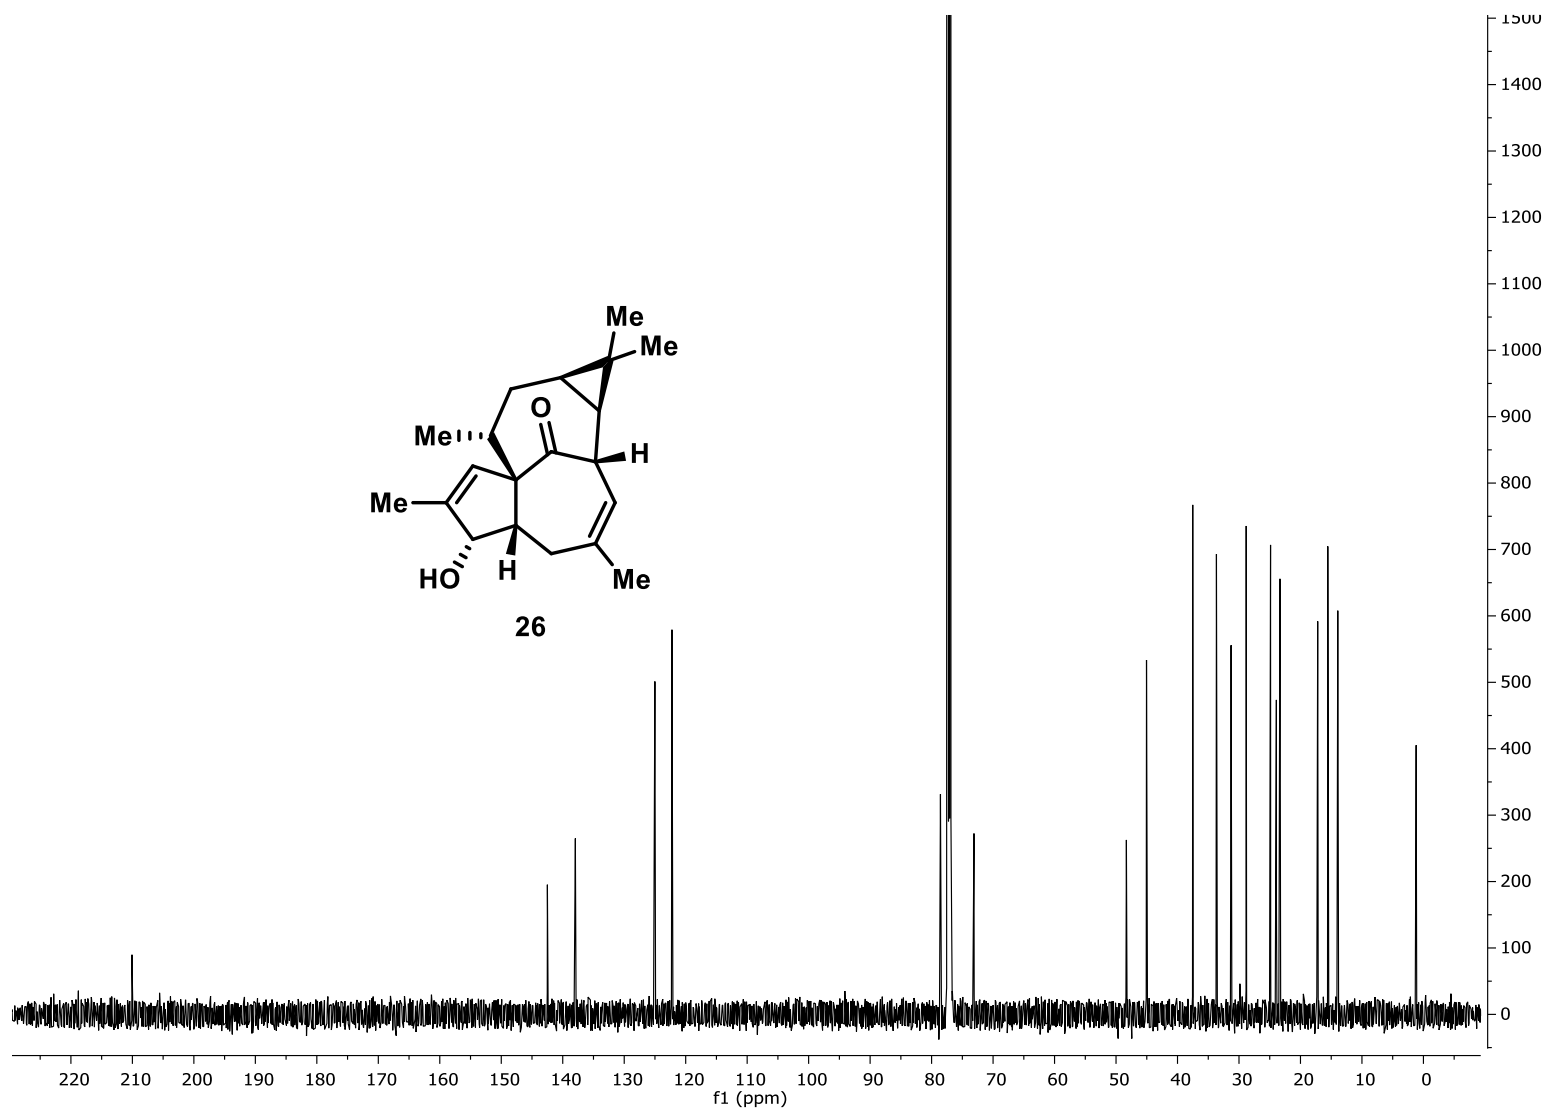

SI-99

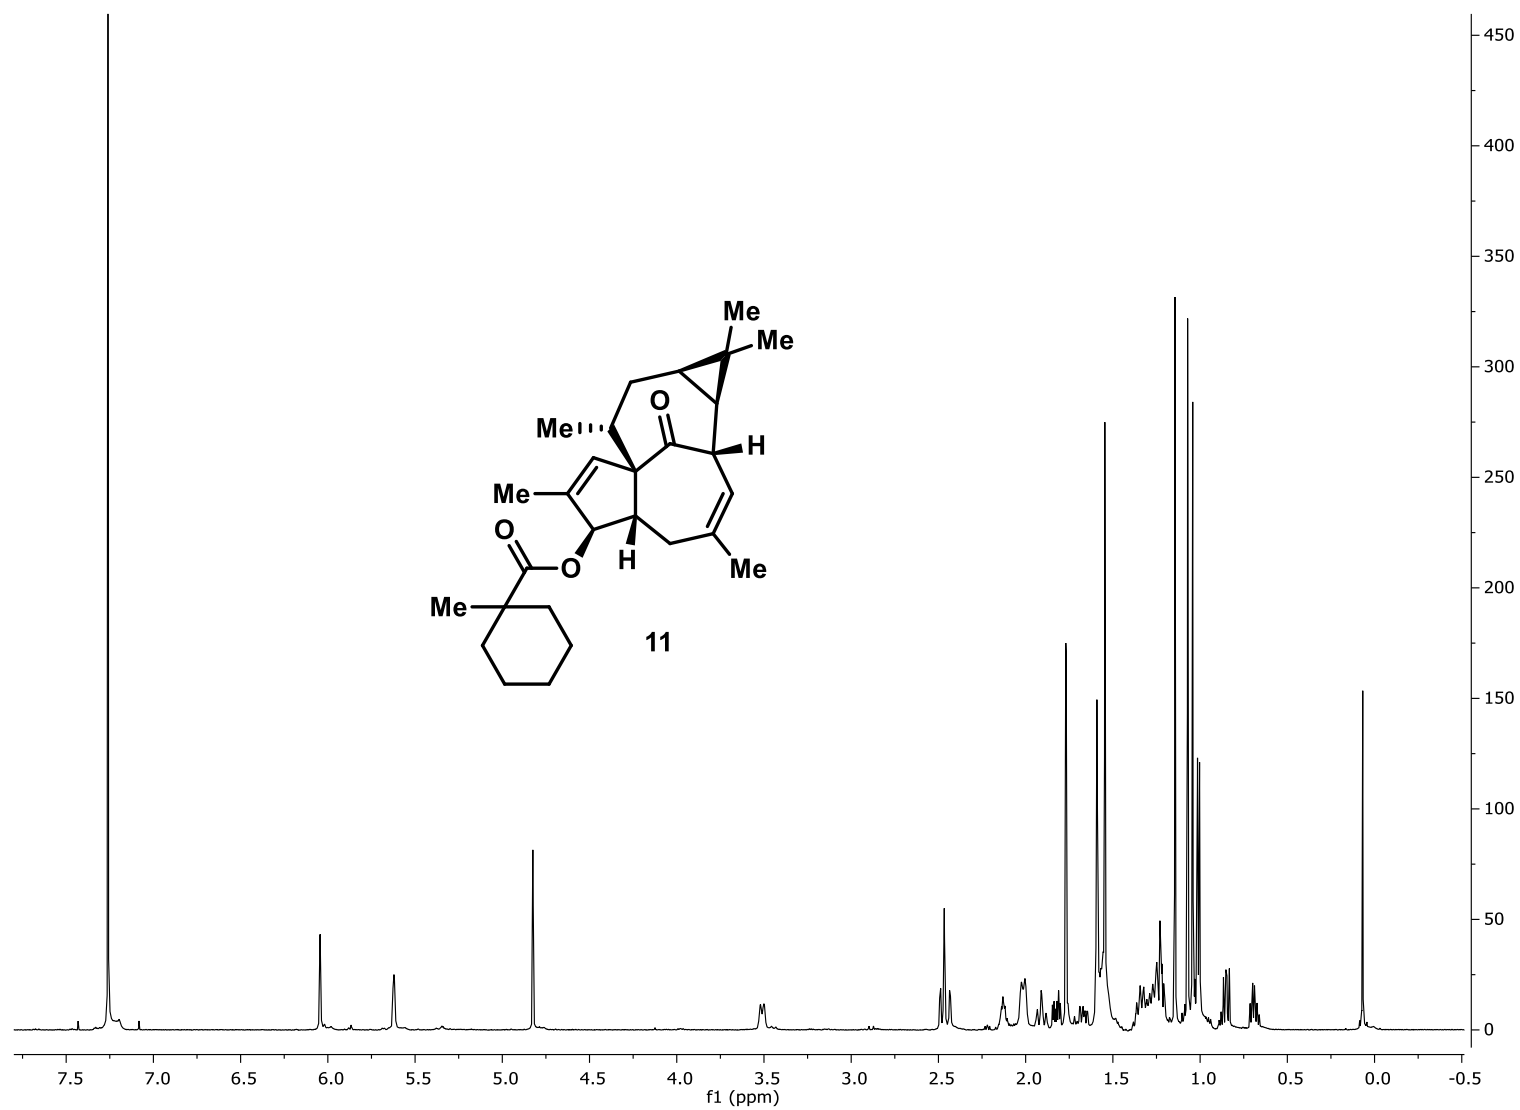

SI-100

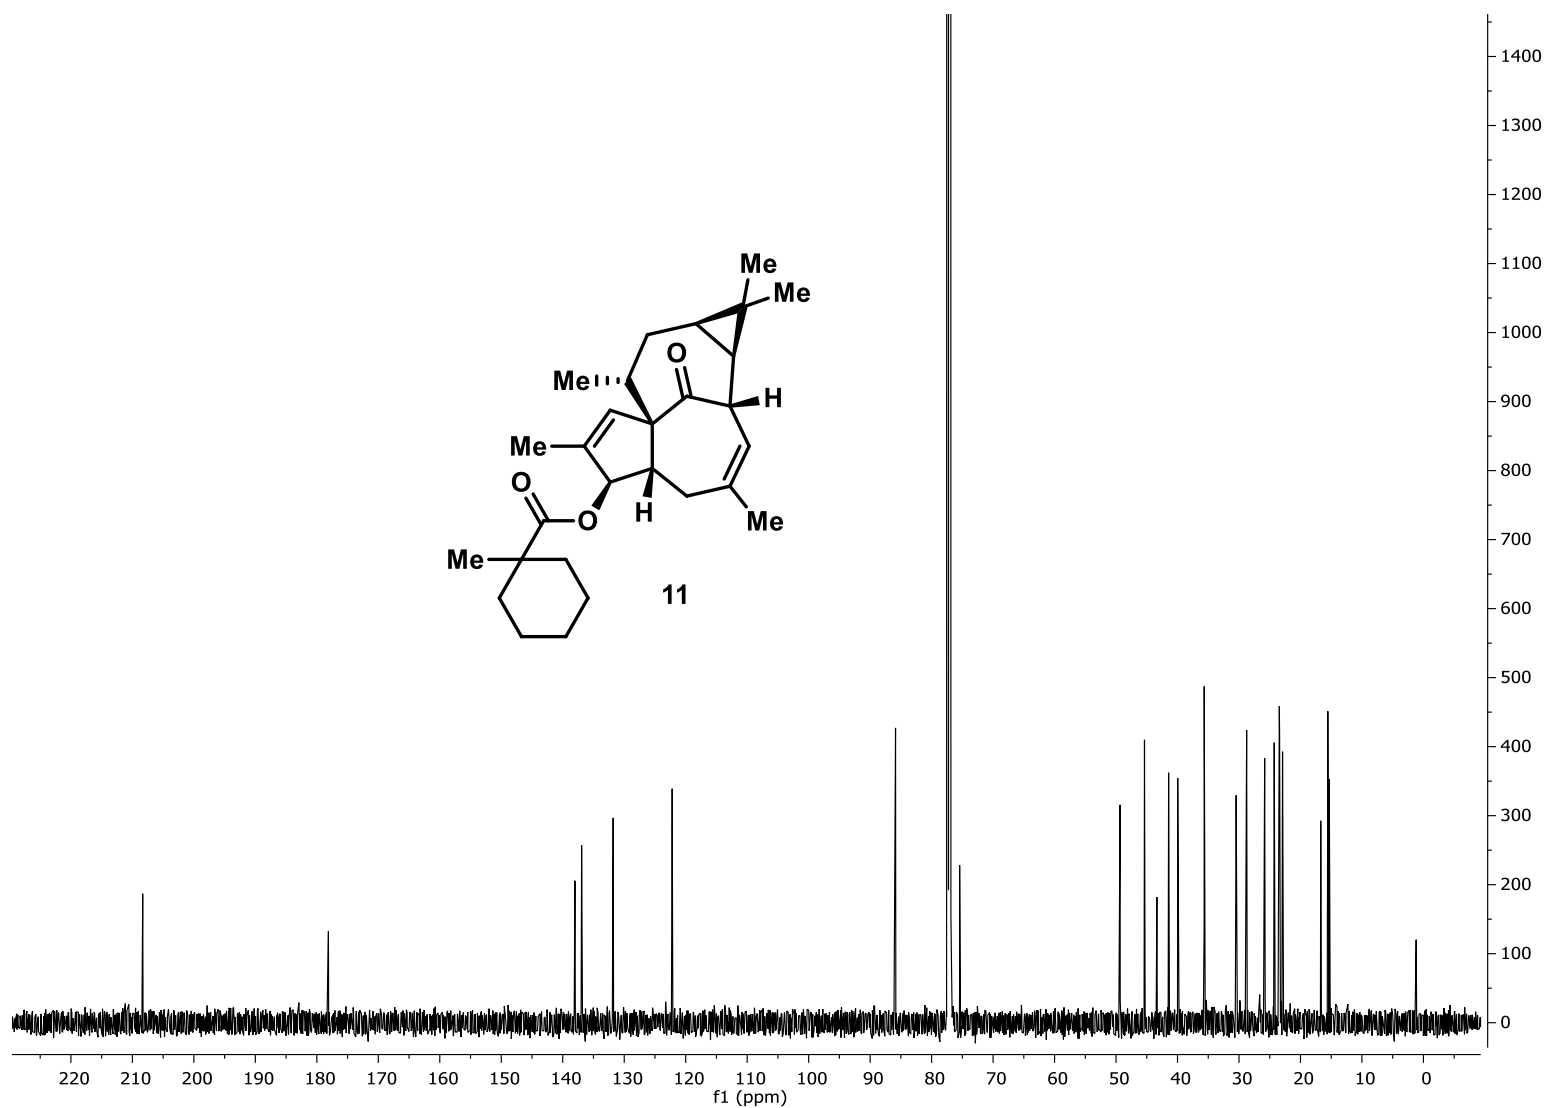

SI-101

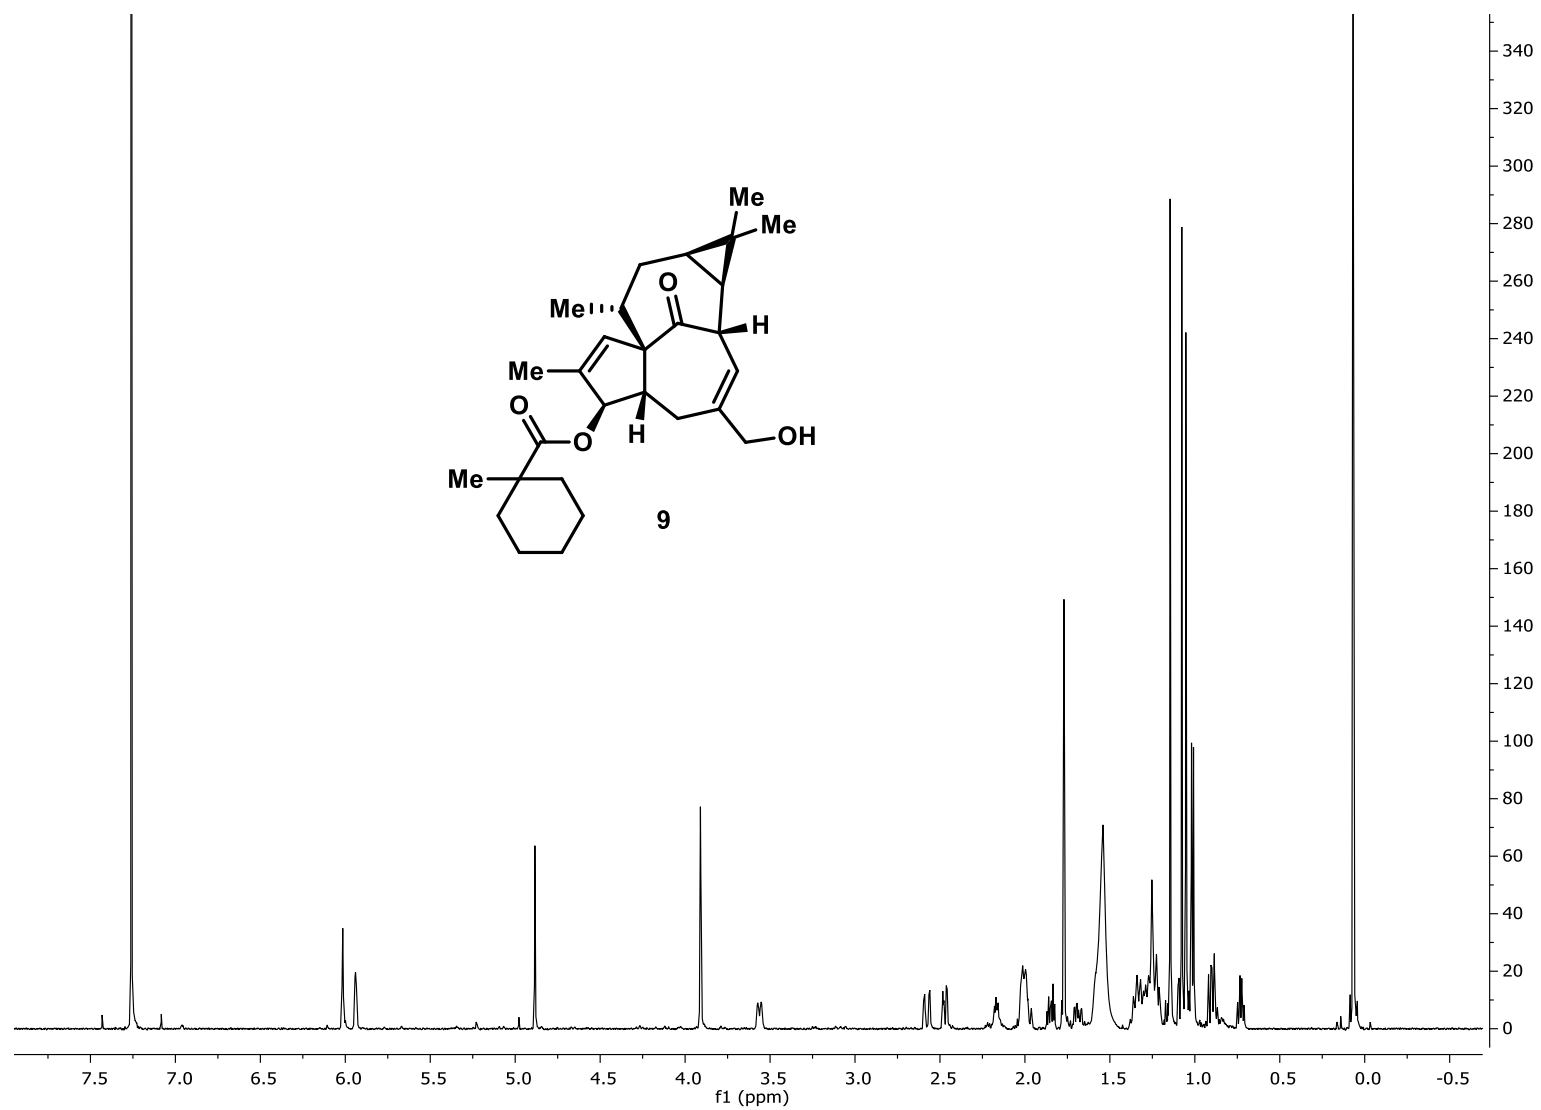

SI-102

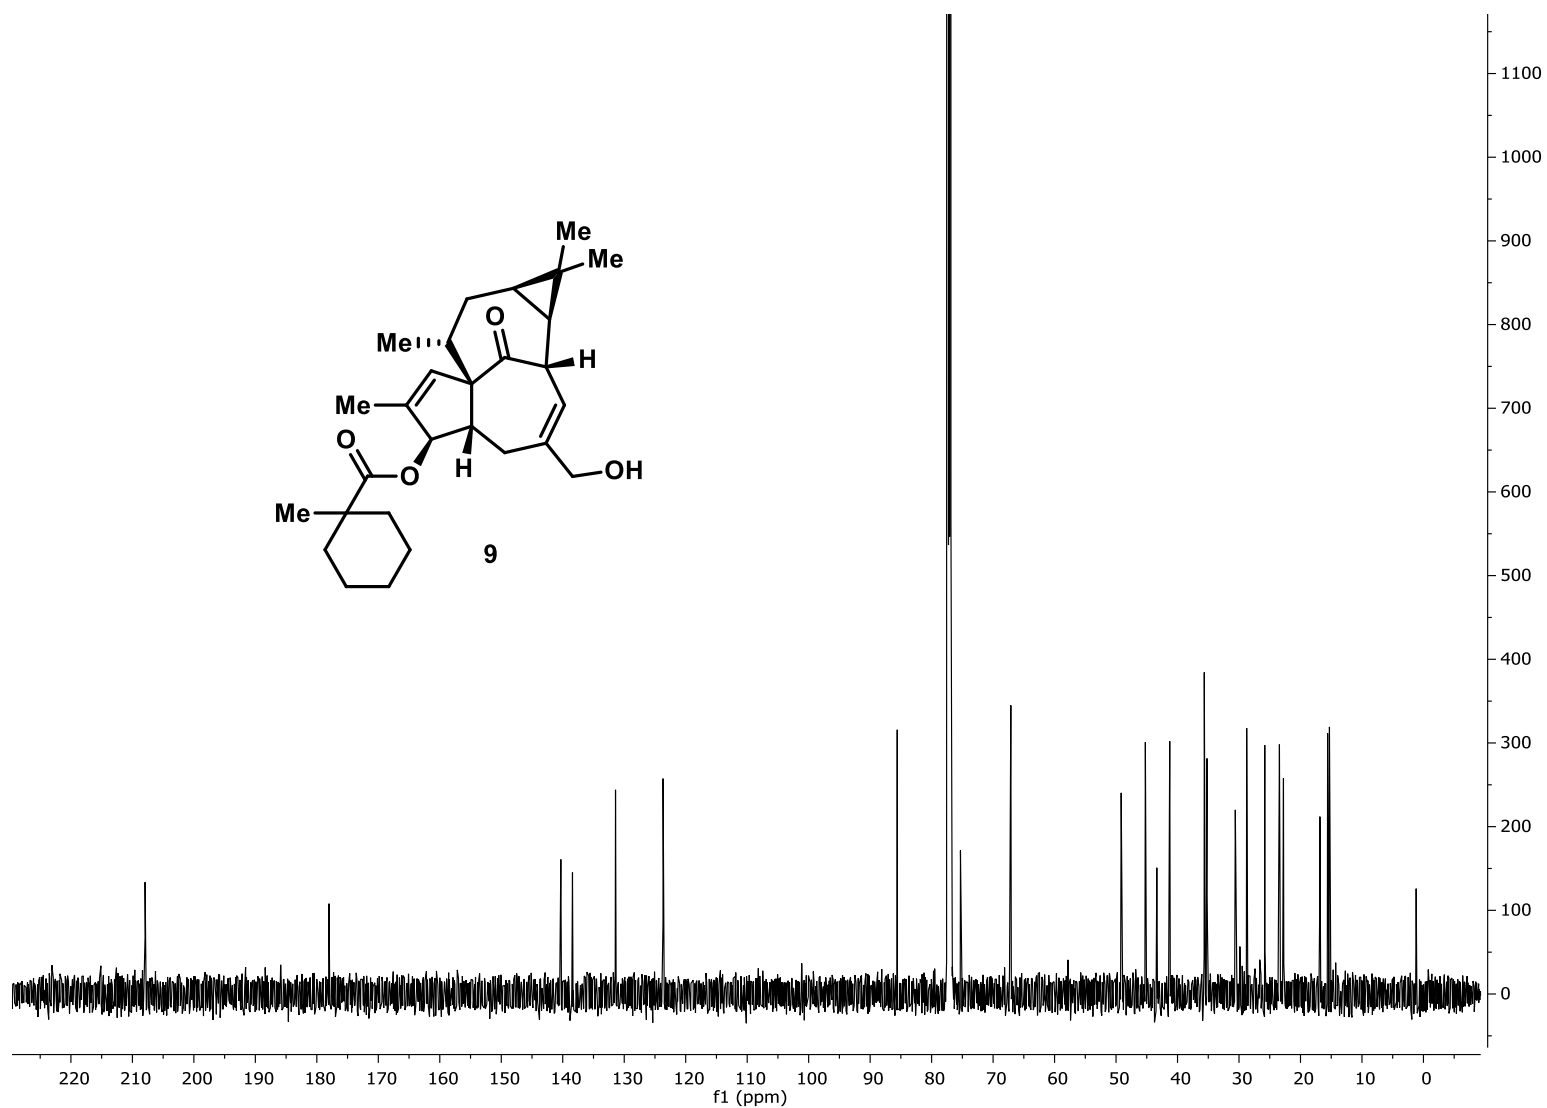

SI-103

# 2D NOESY

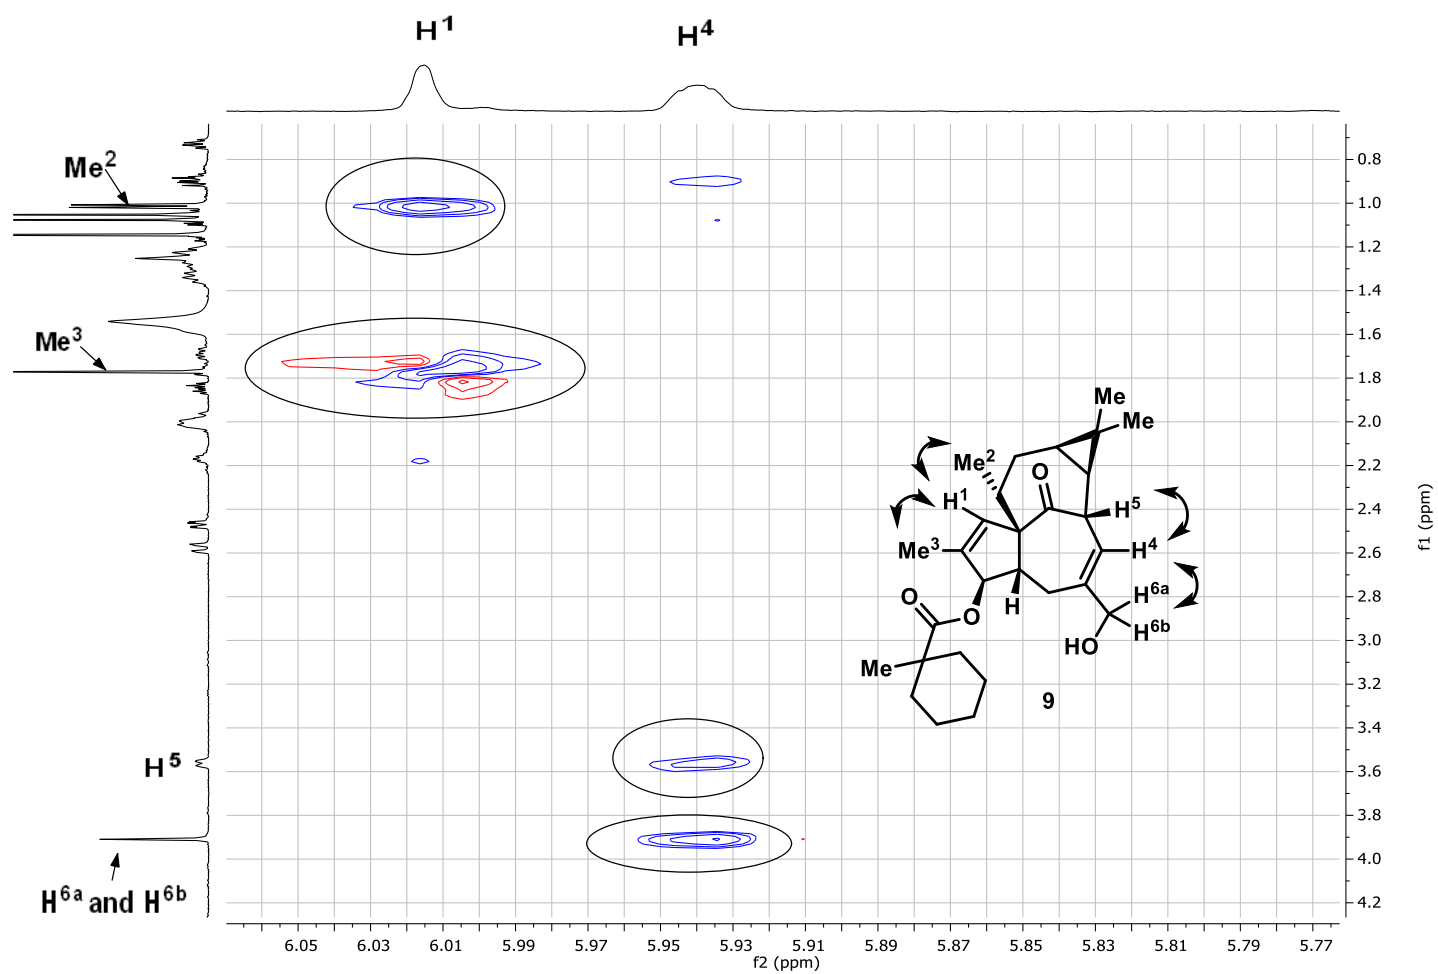

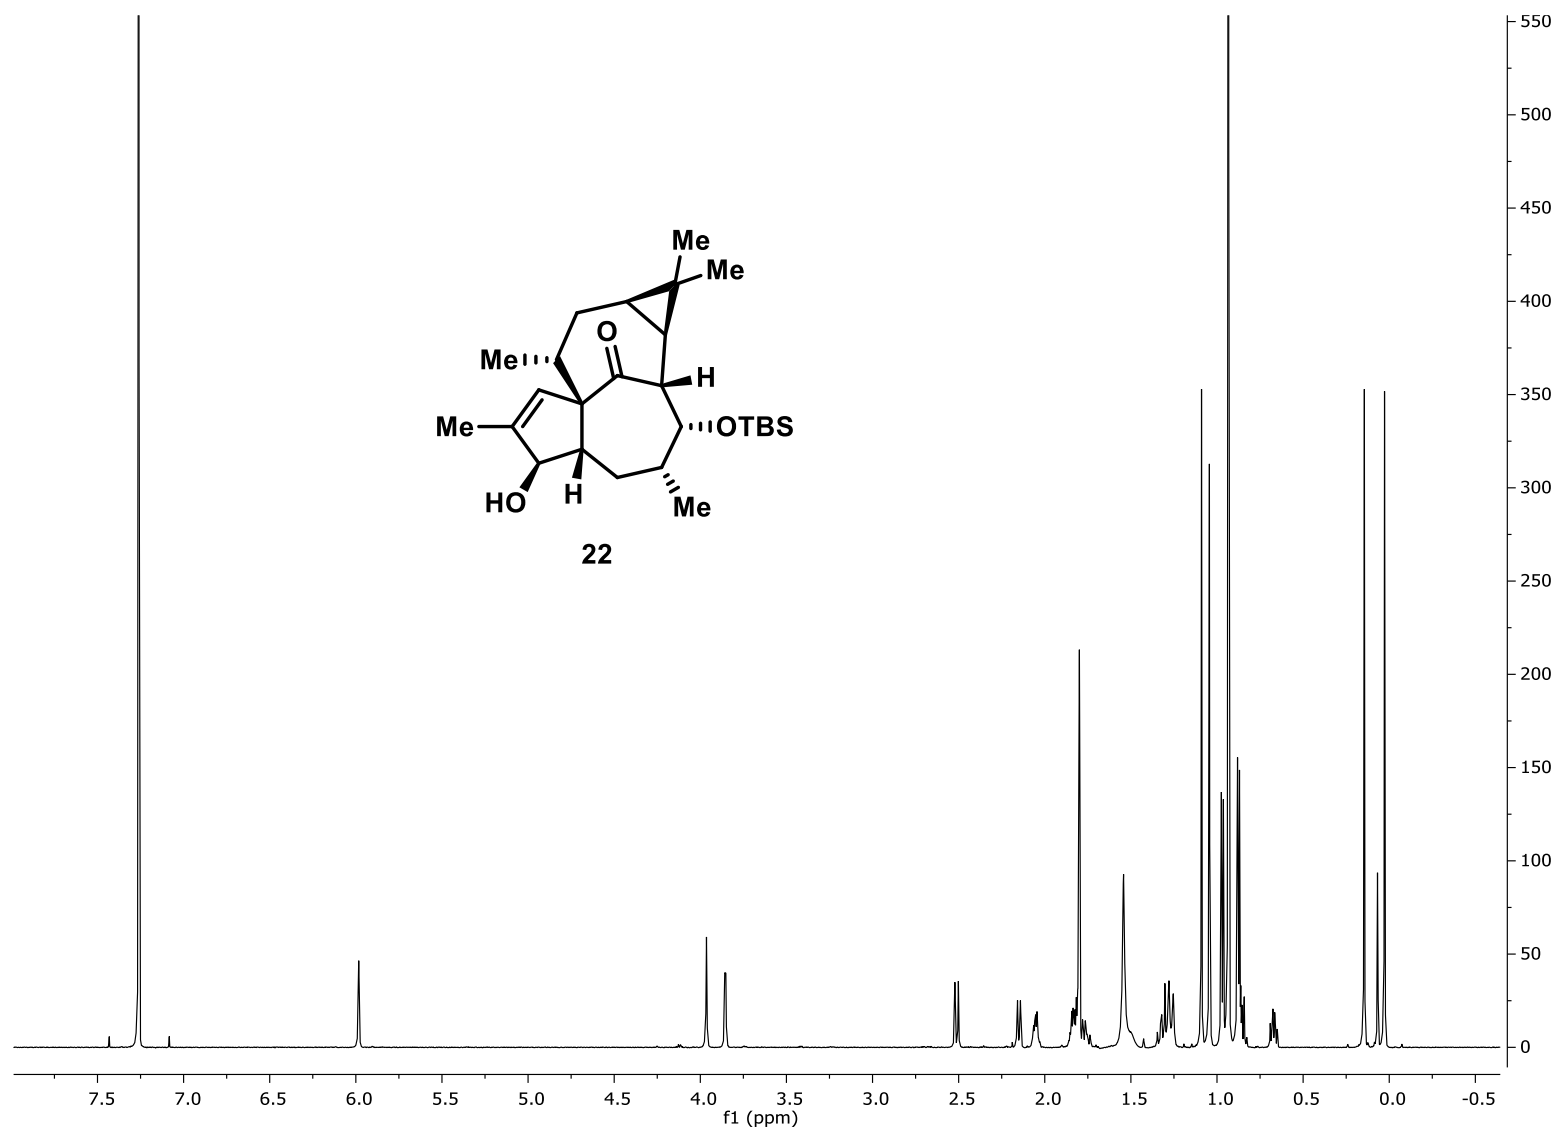

SI-105

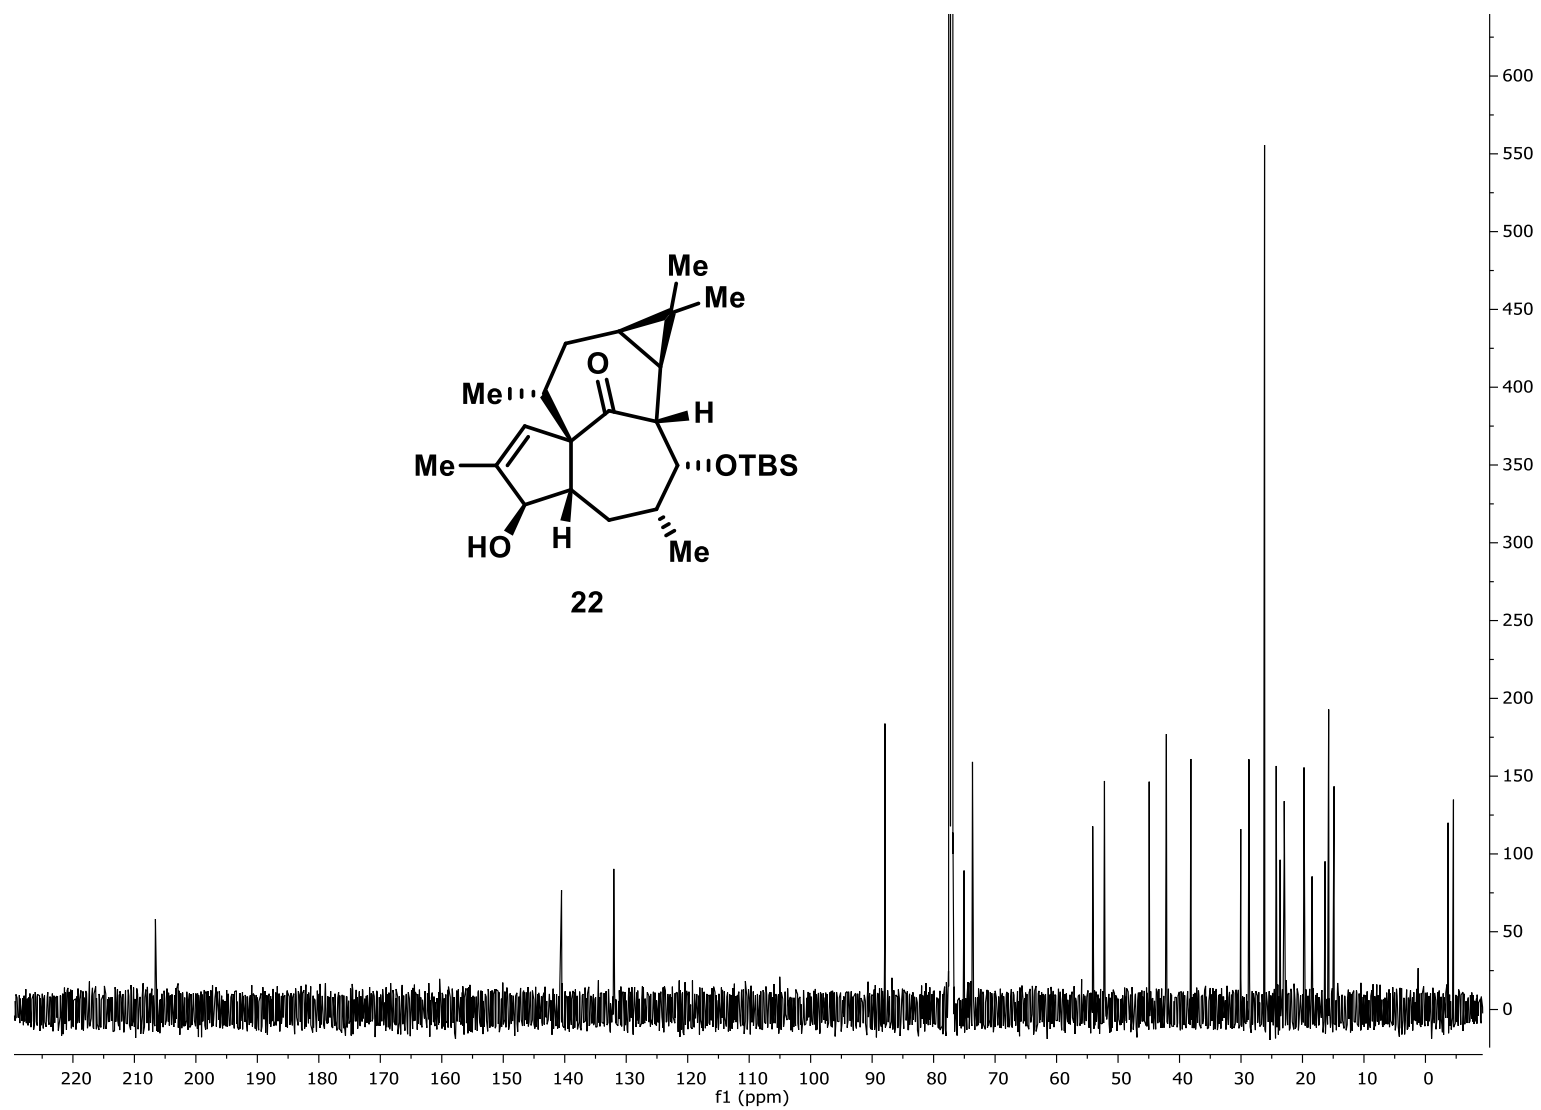

SI-106

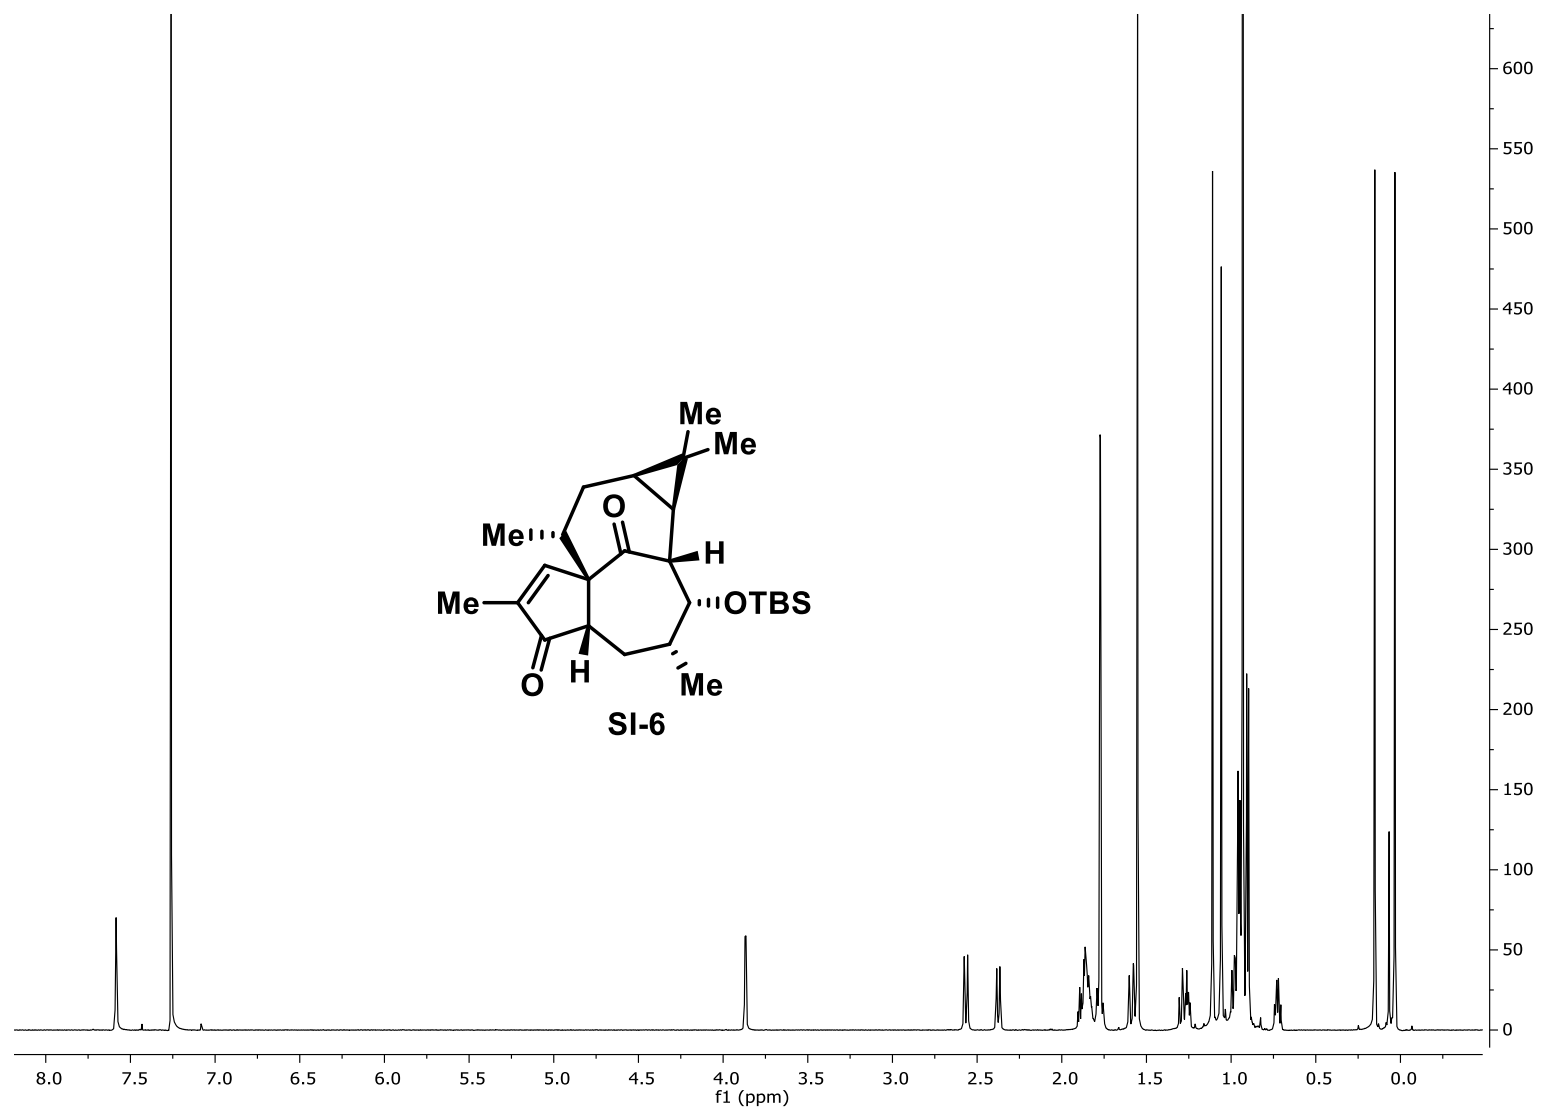

SI-107

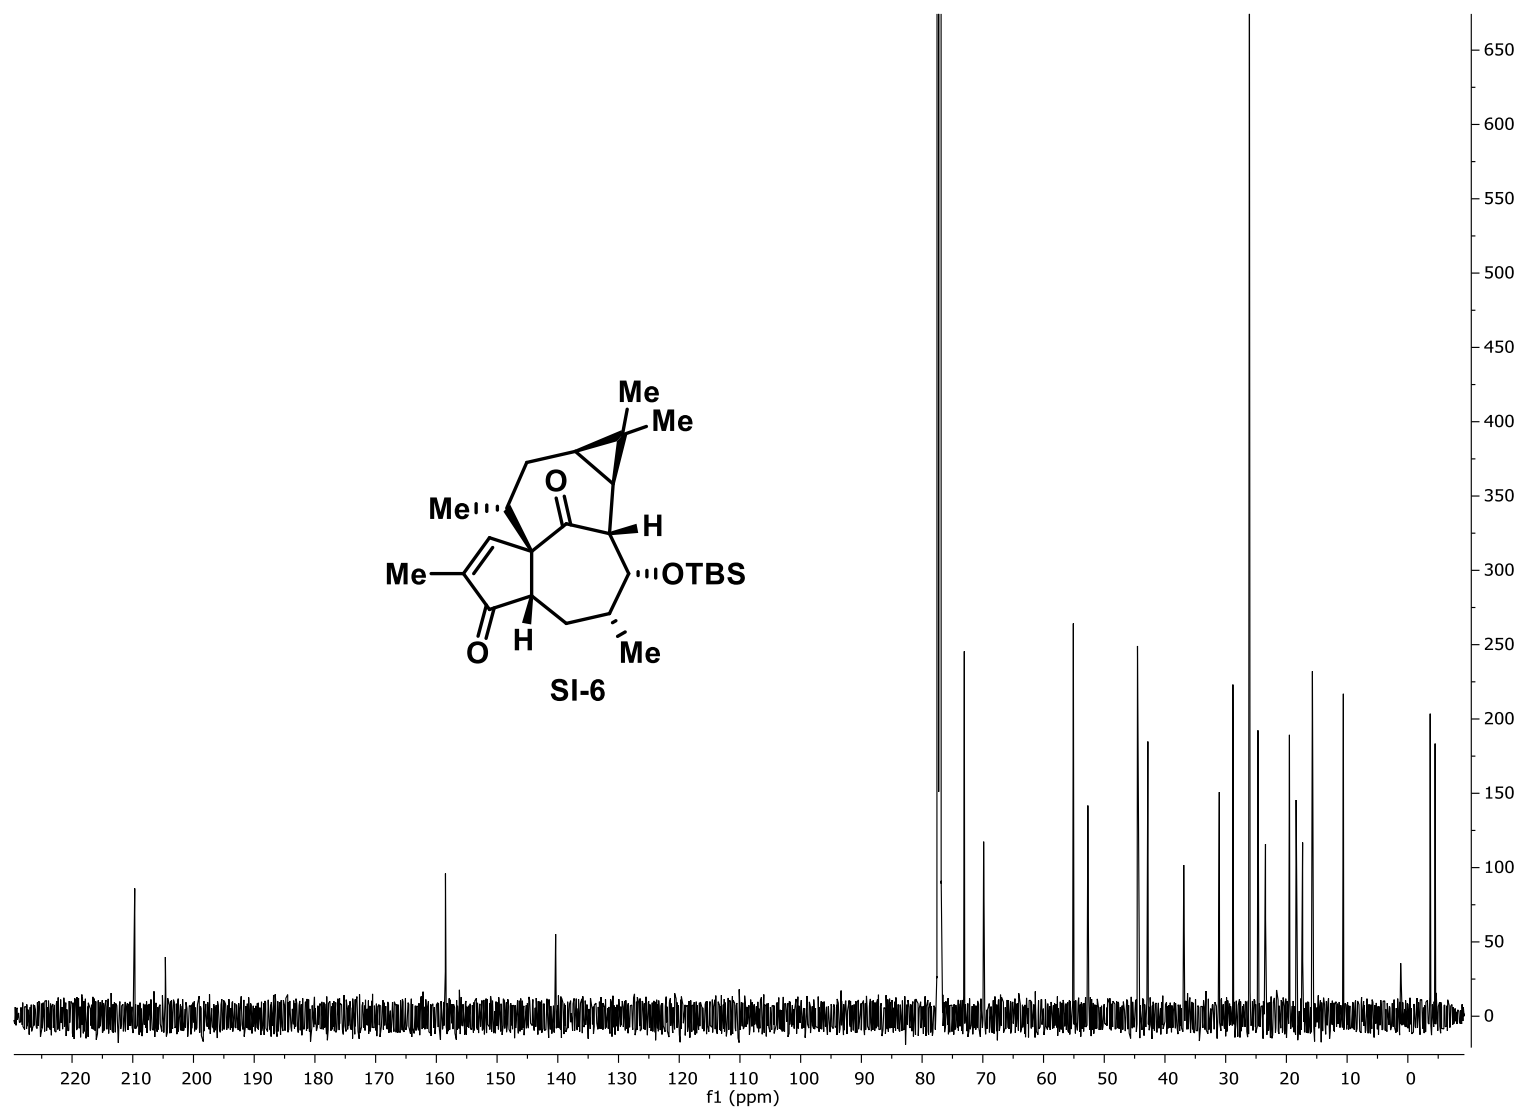

SI-108





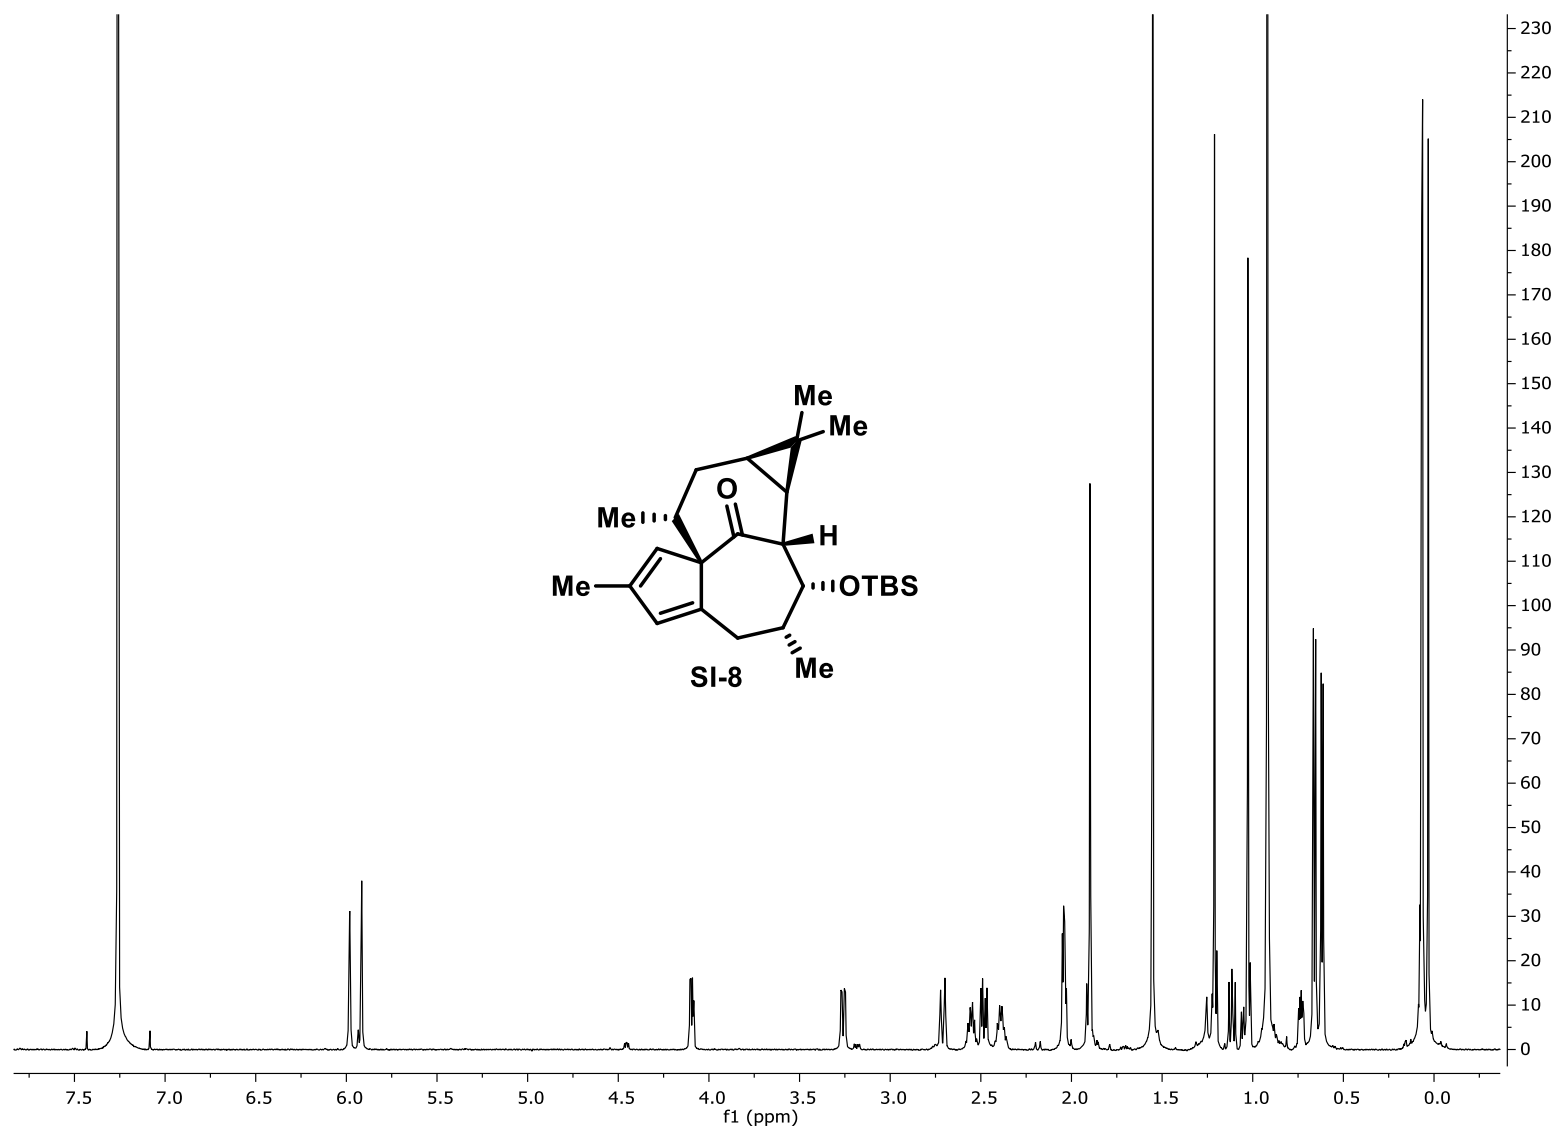

SI-111



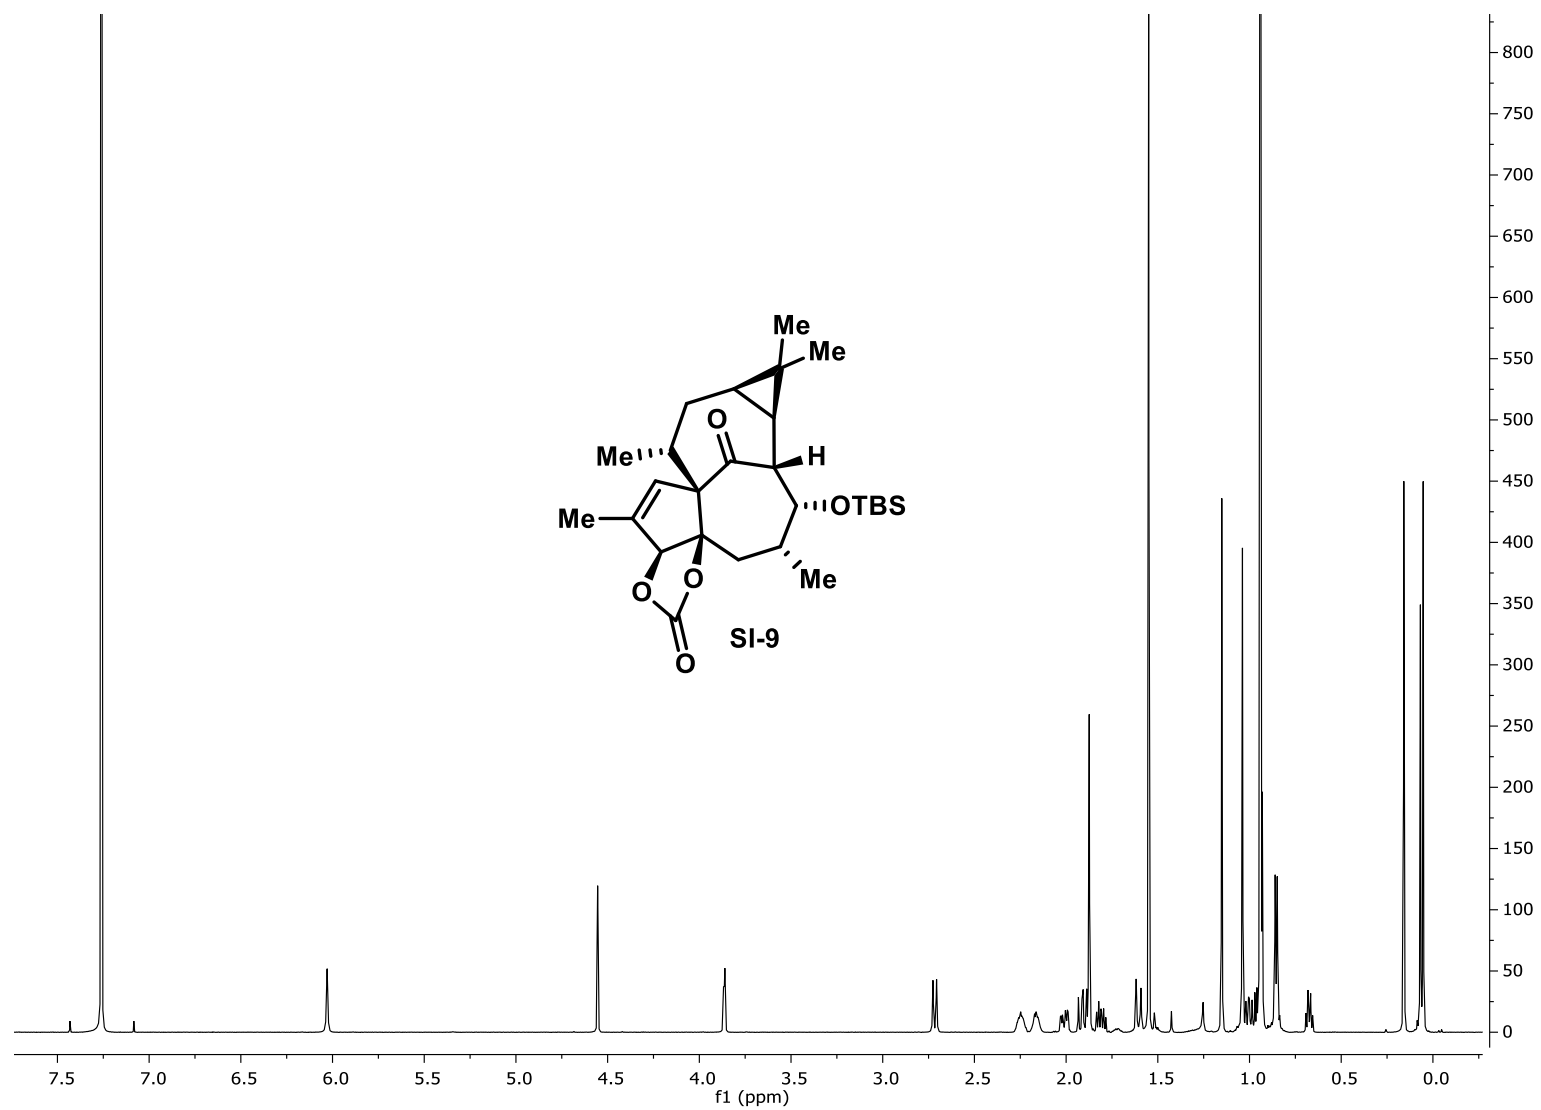

SI-113





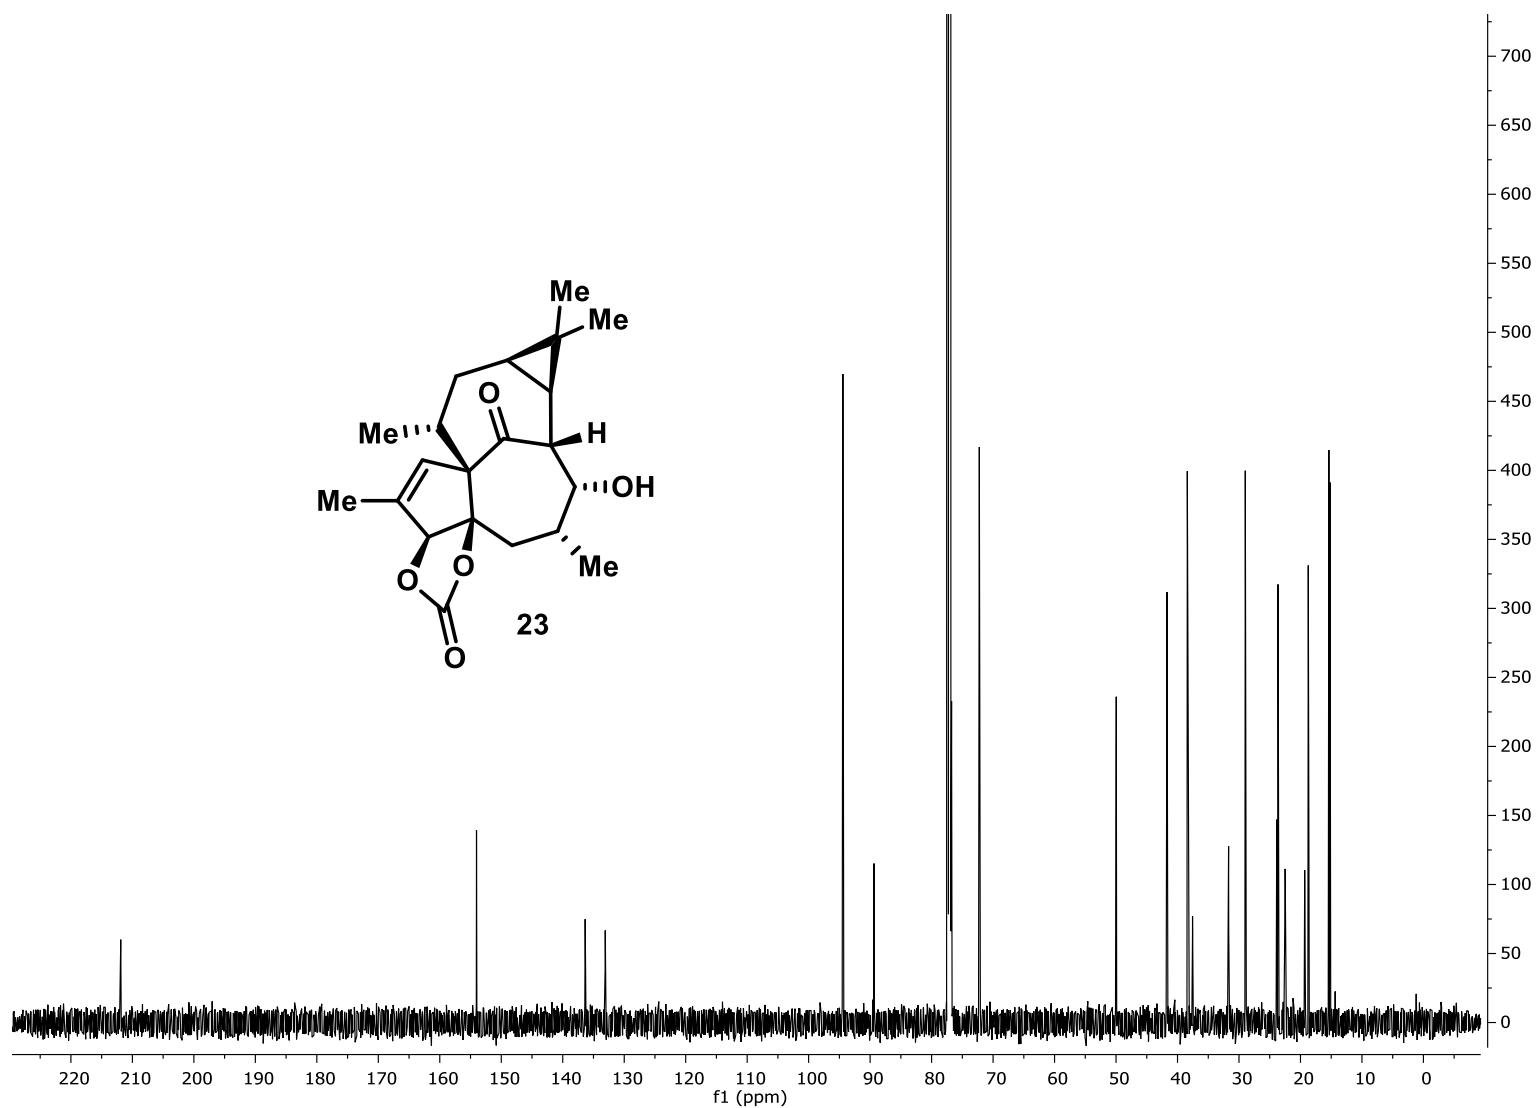

SI-116

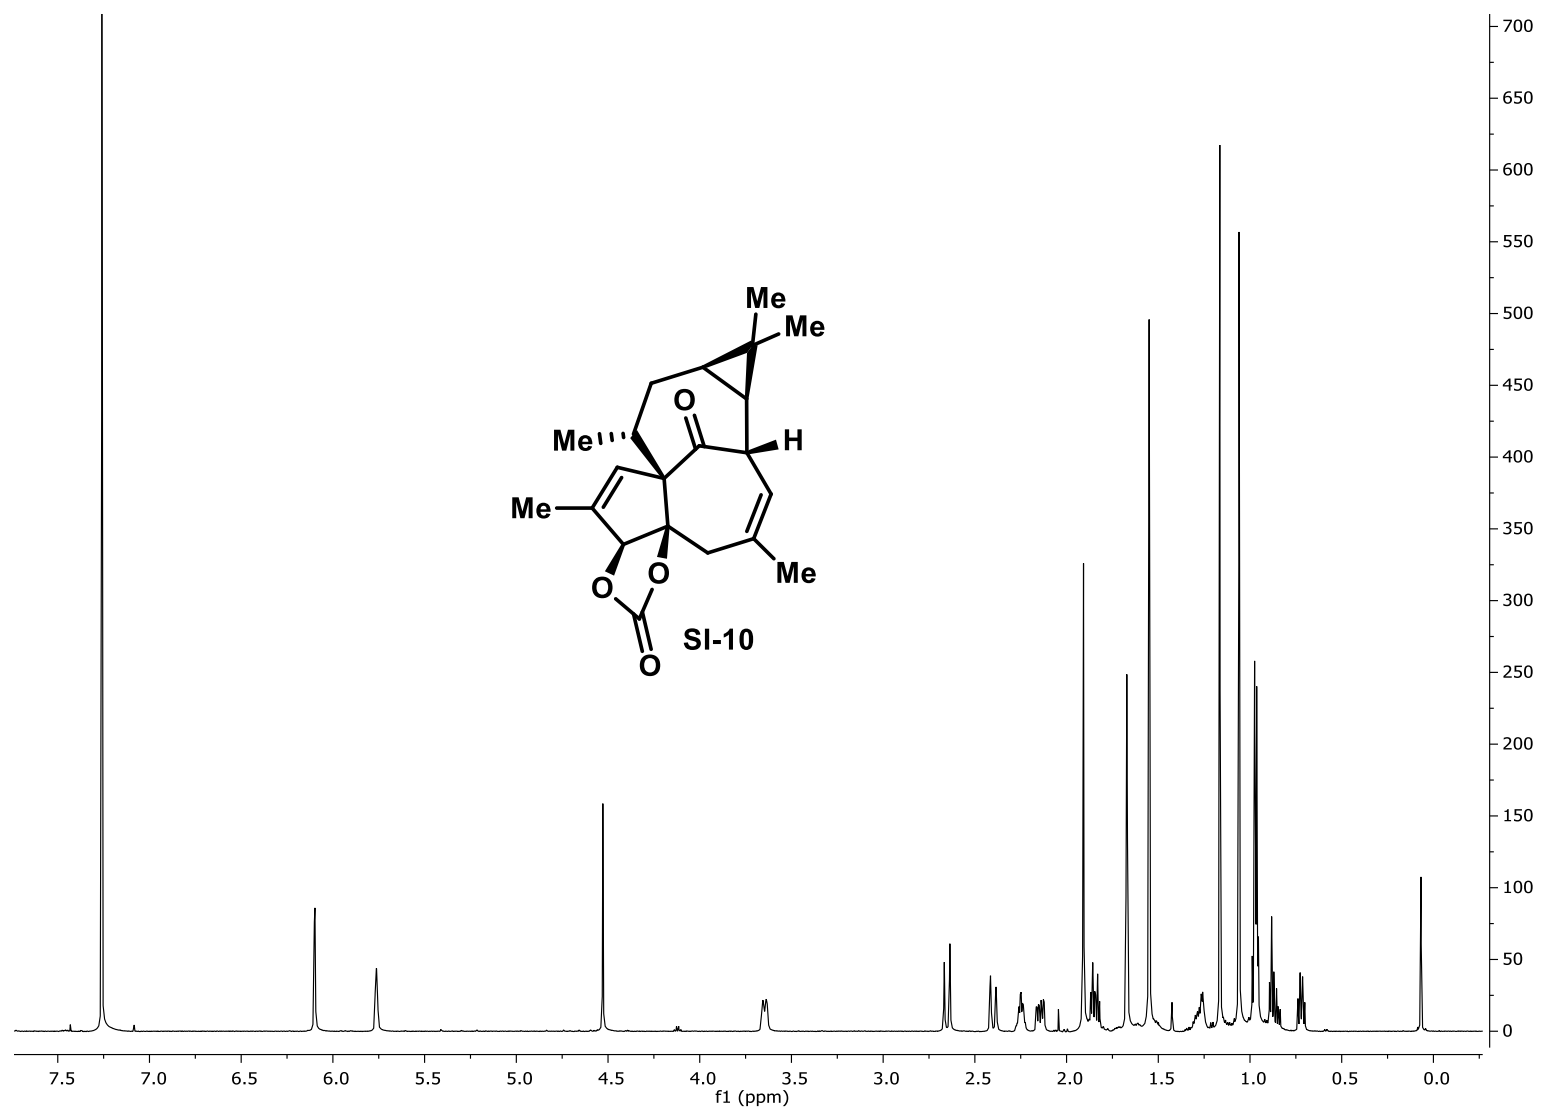

SI-117

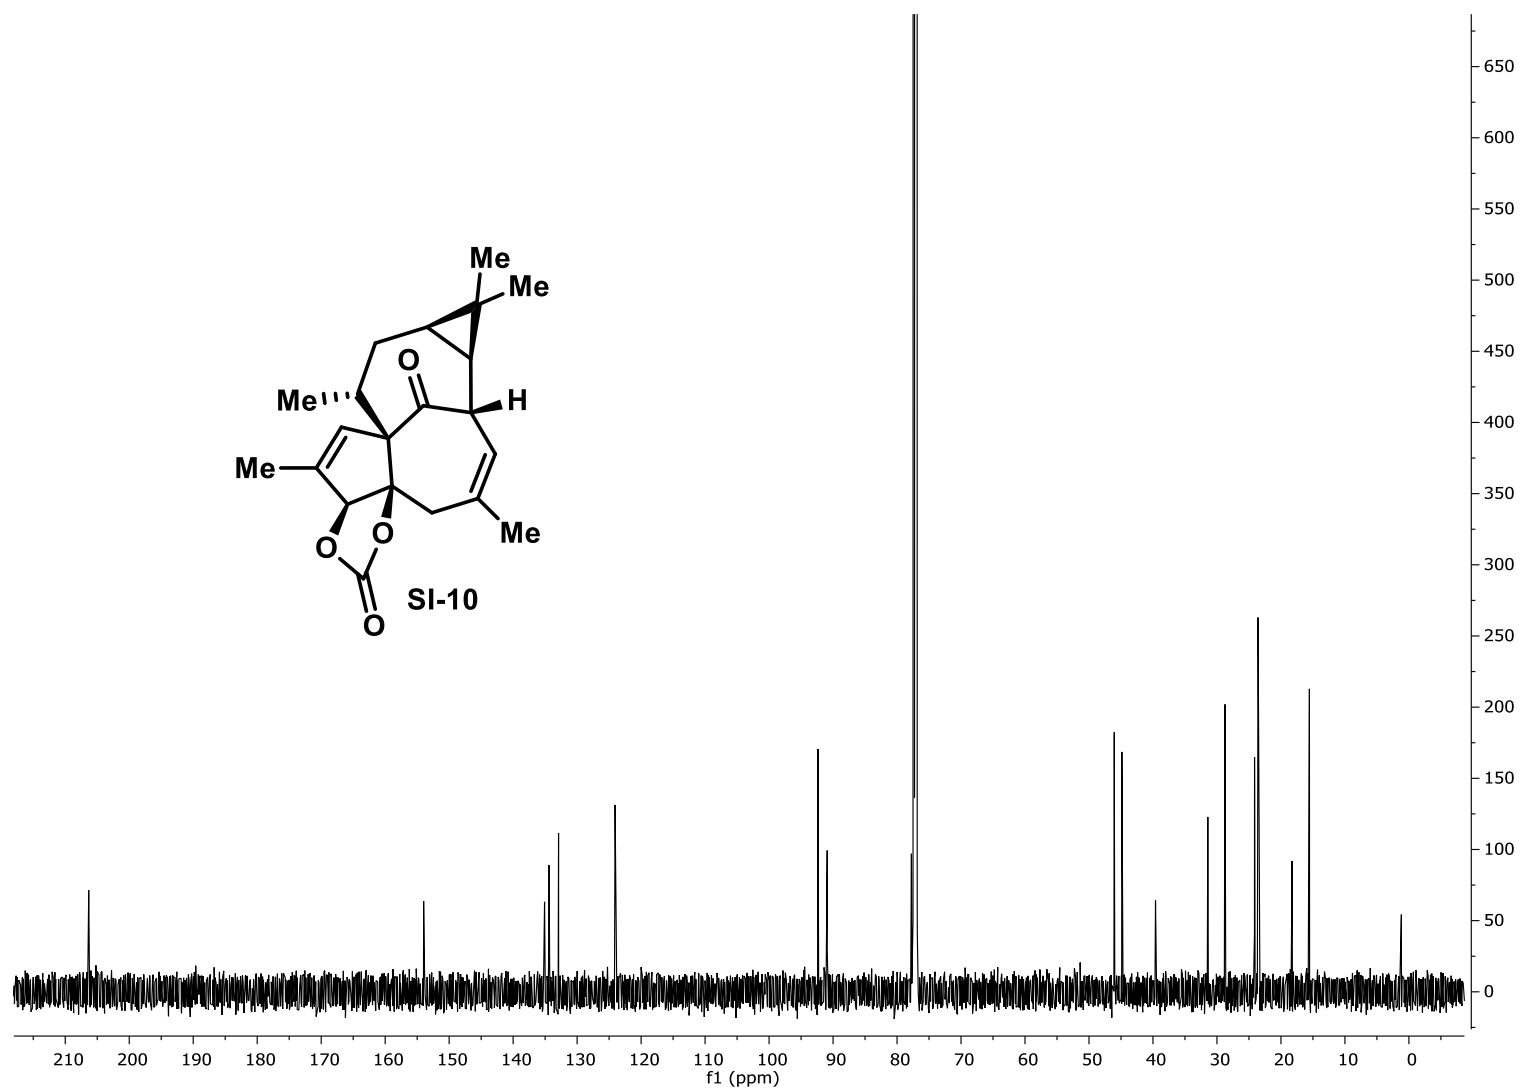

SI-118

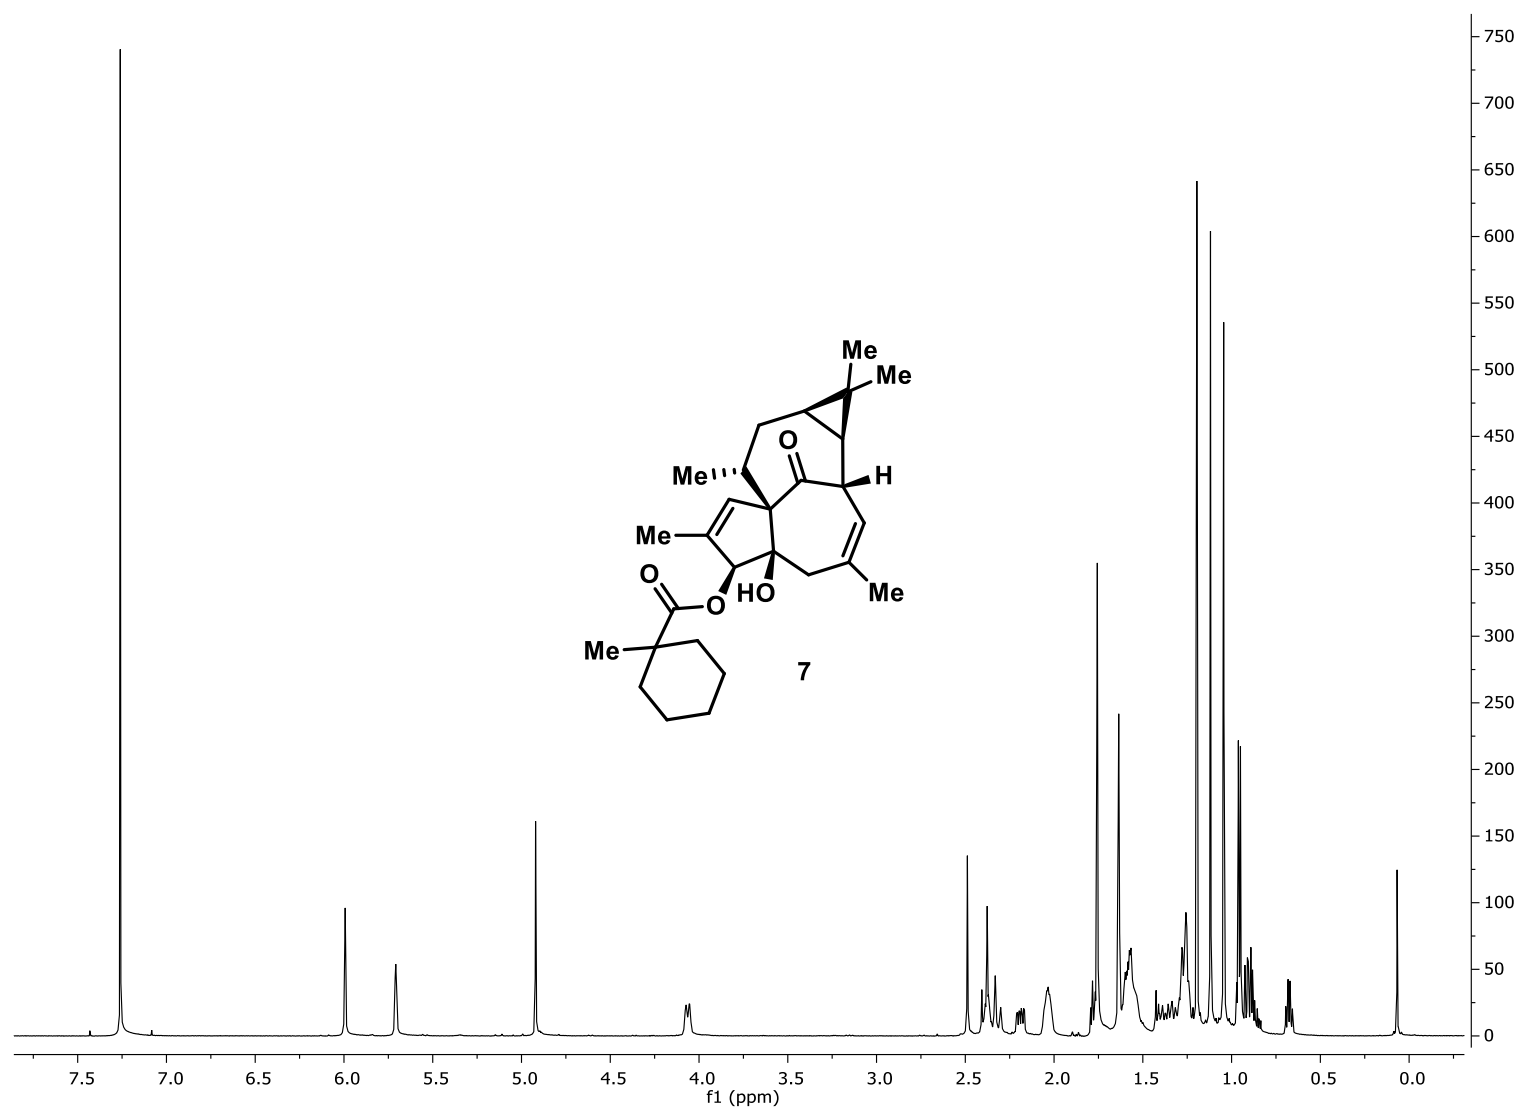

SI-119

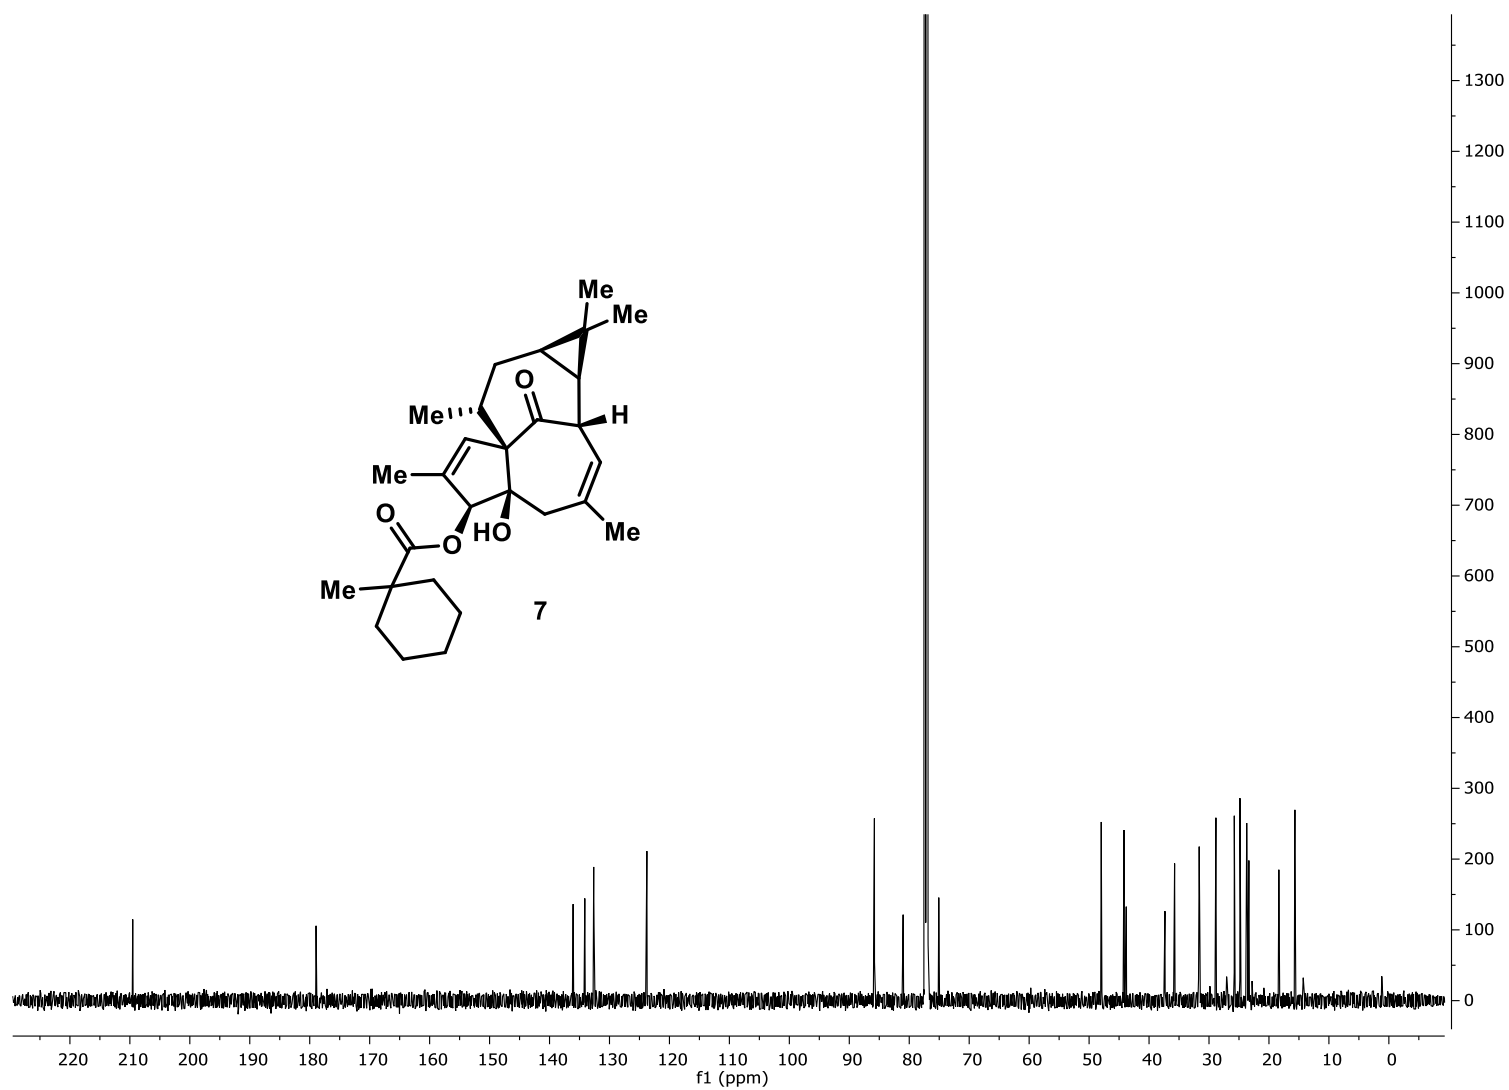

SI-120

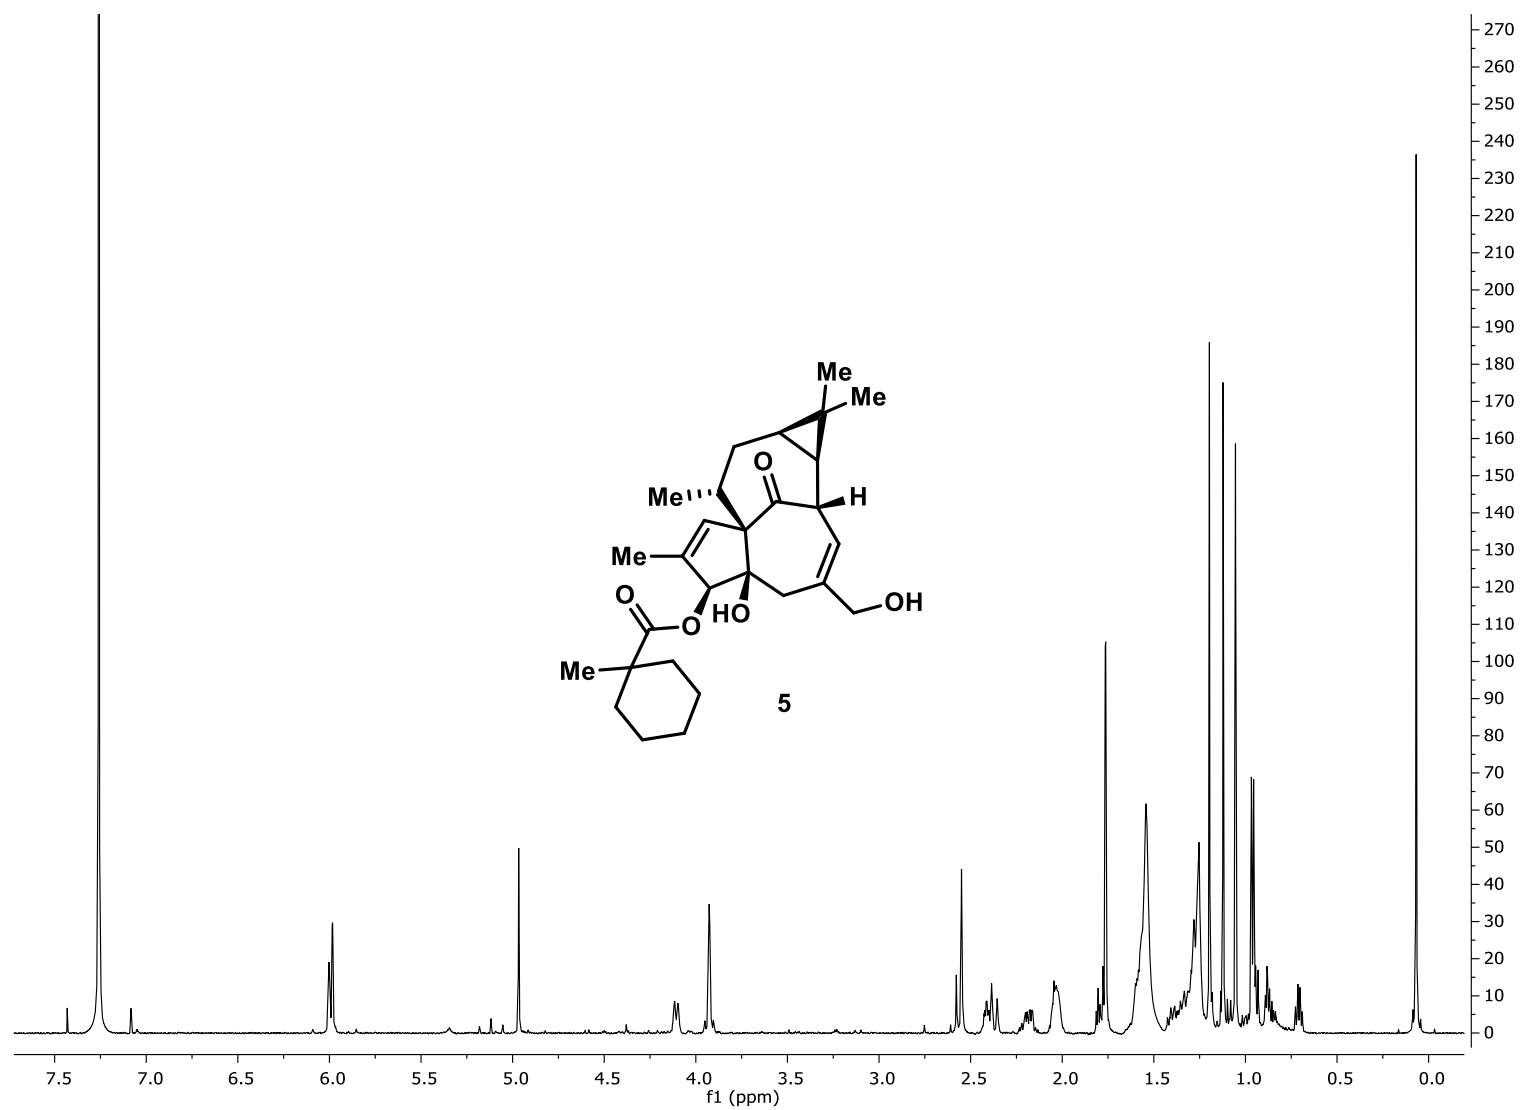

SI-121

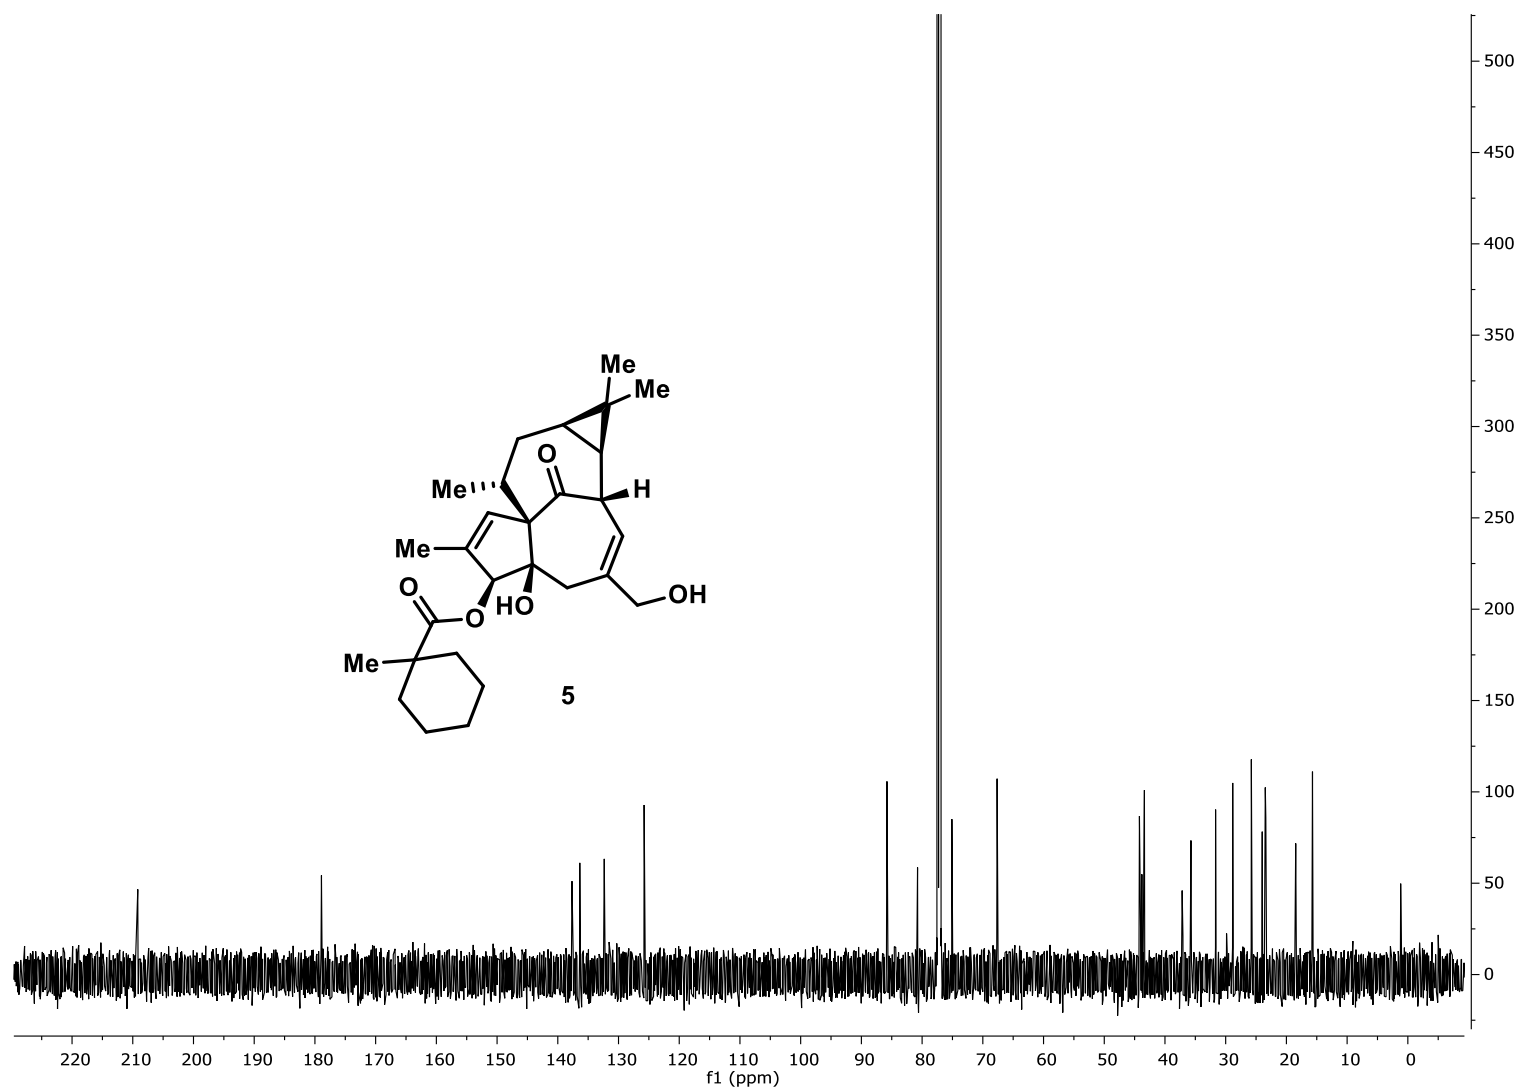

2D NOESY

SI-122

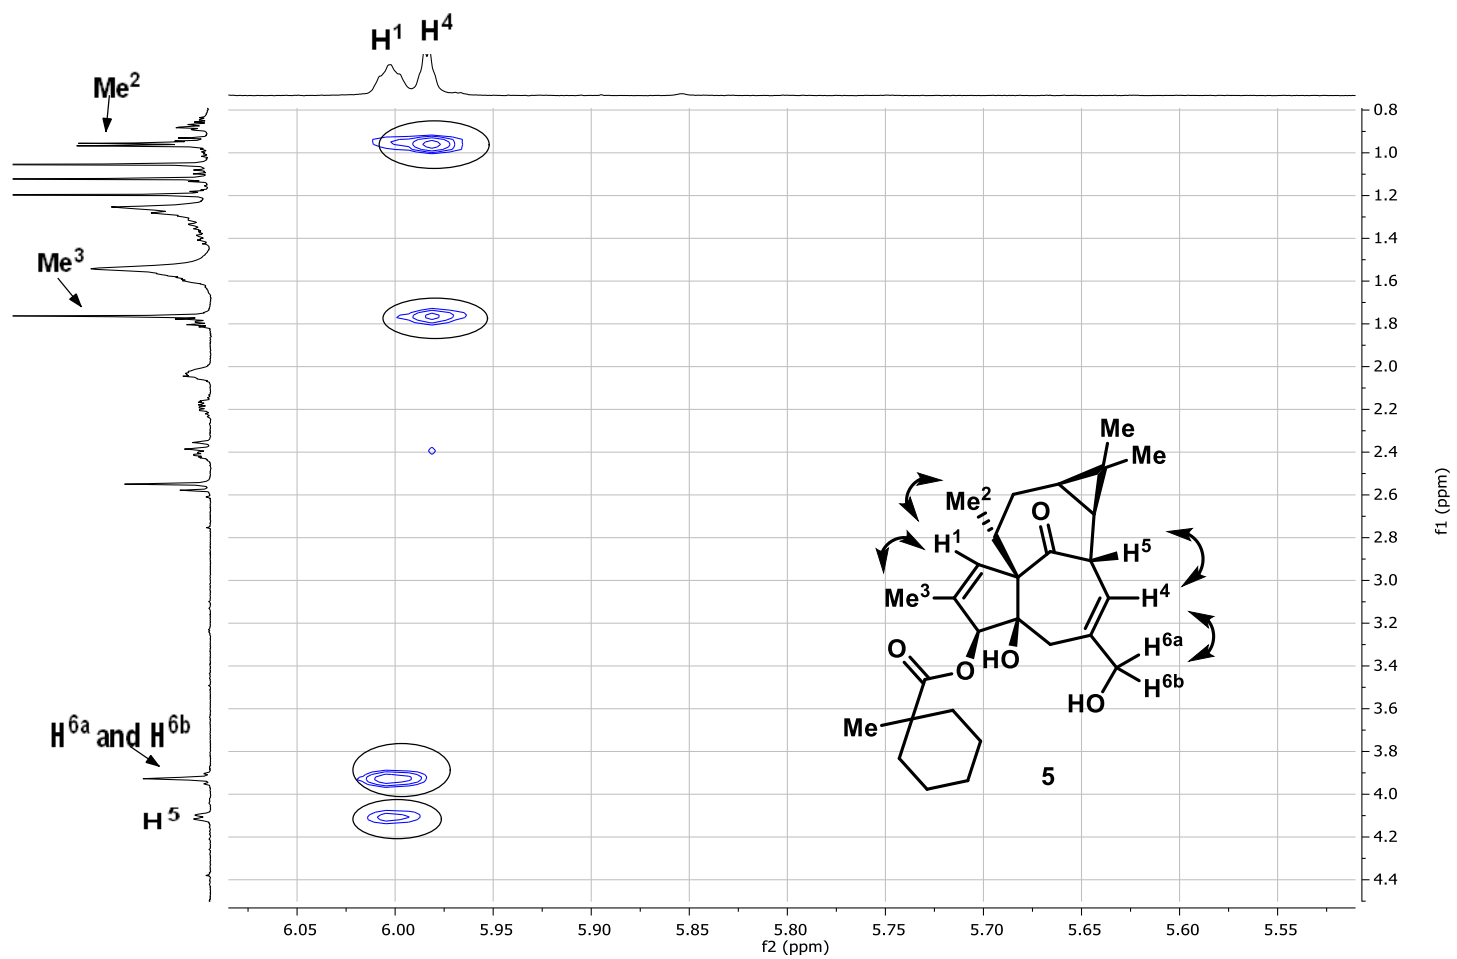

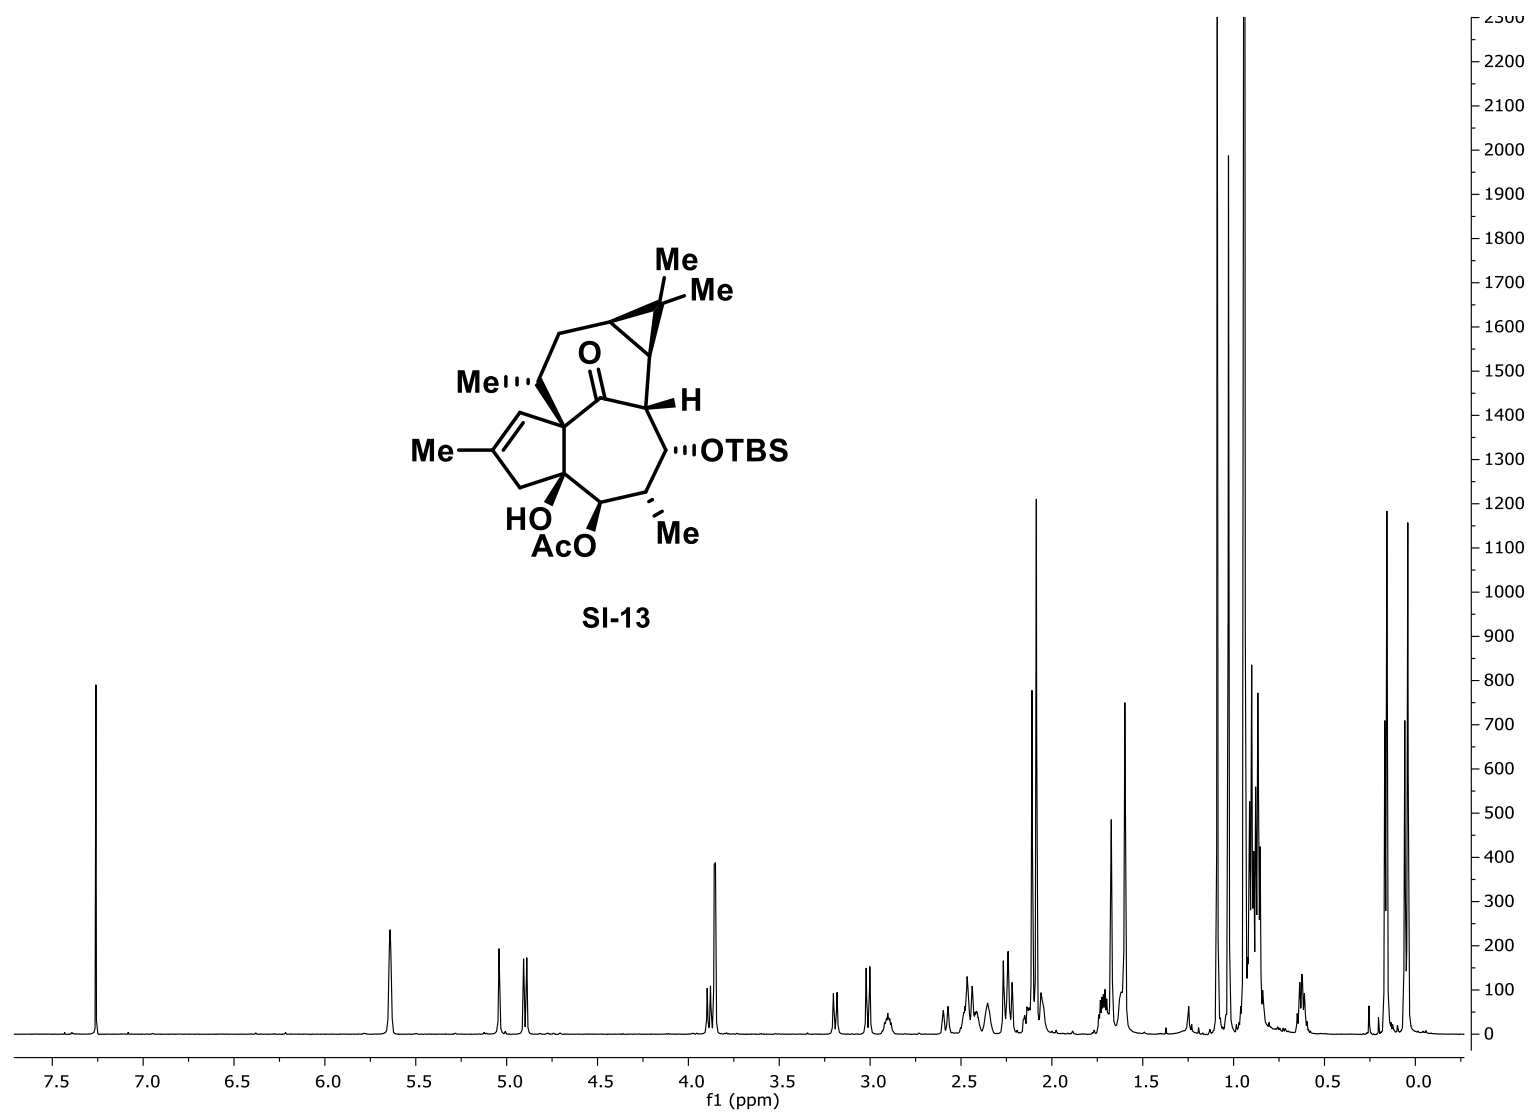

SI-124

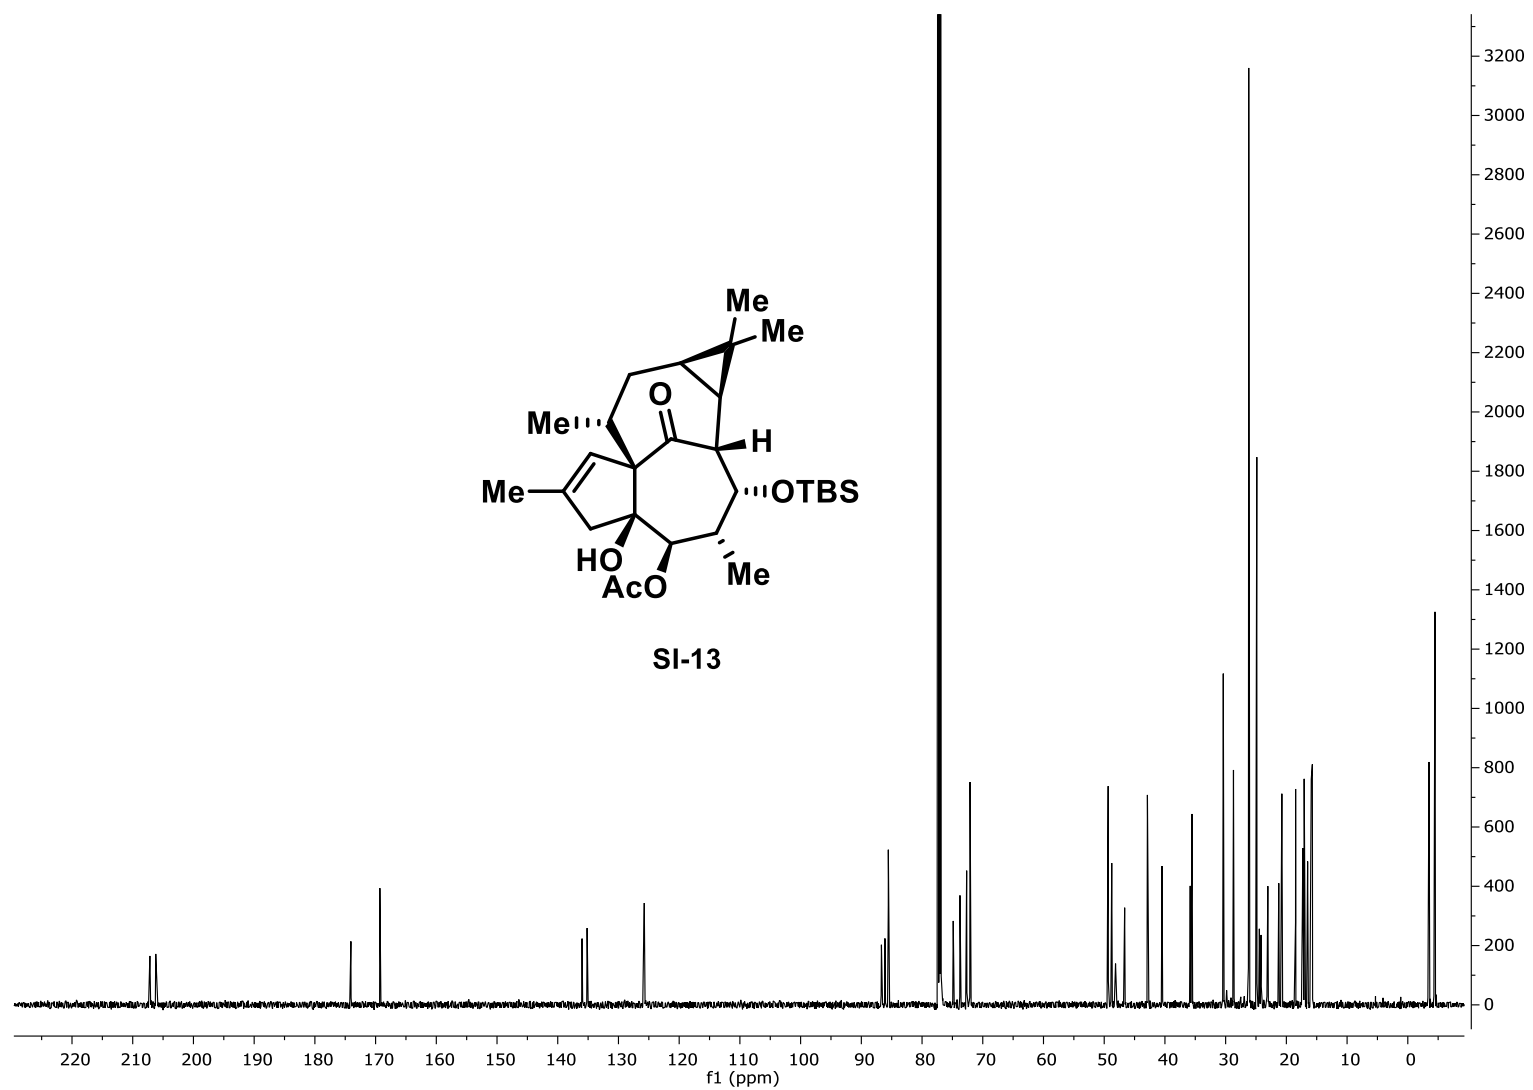

2D NOESY

SI-125

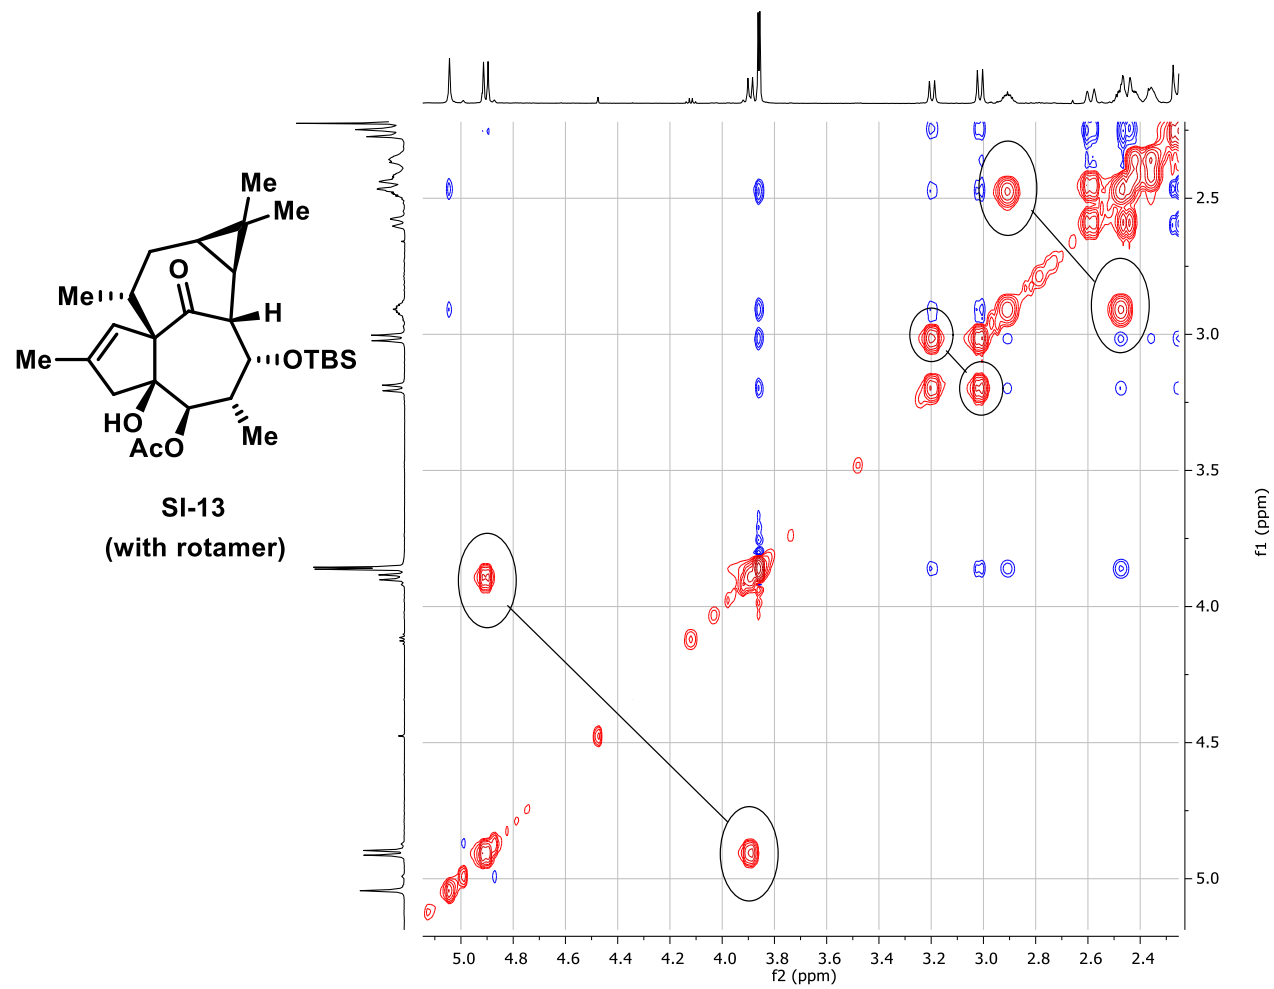

SI-126

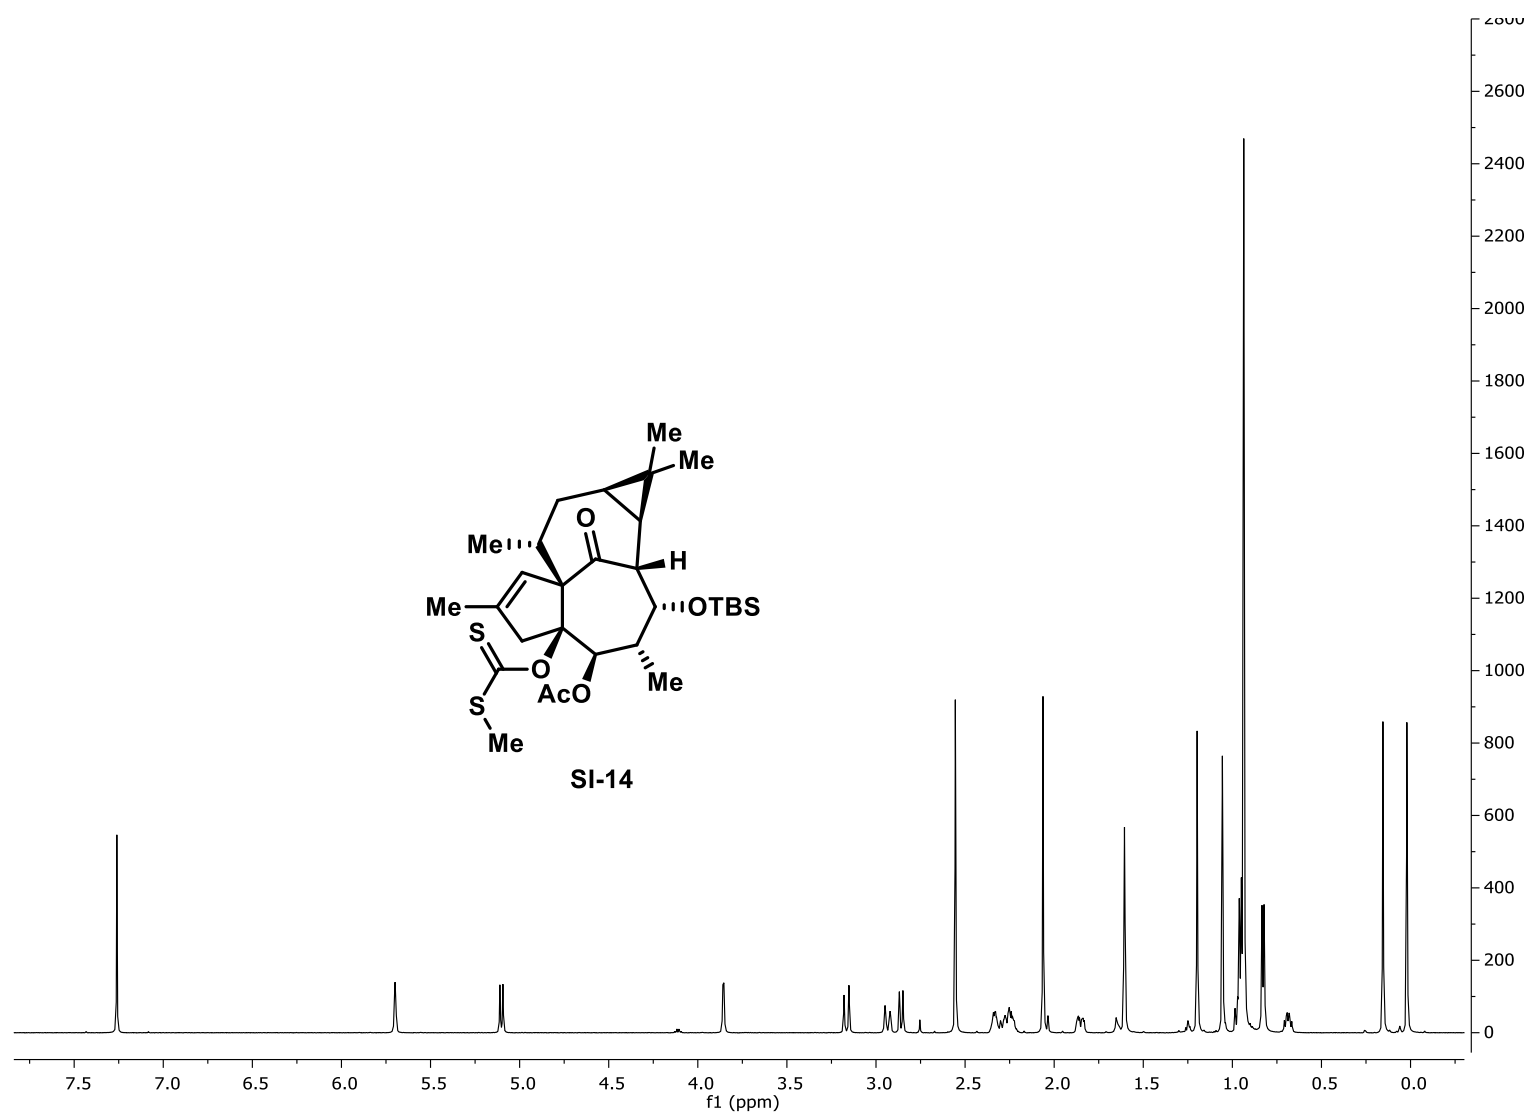

SI-127

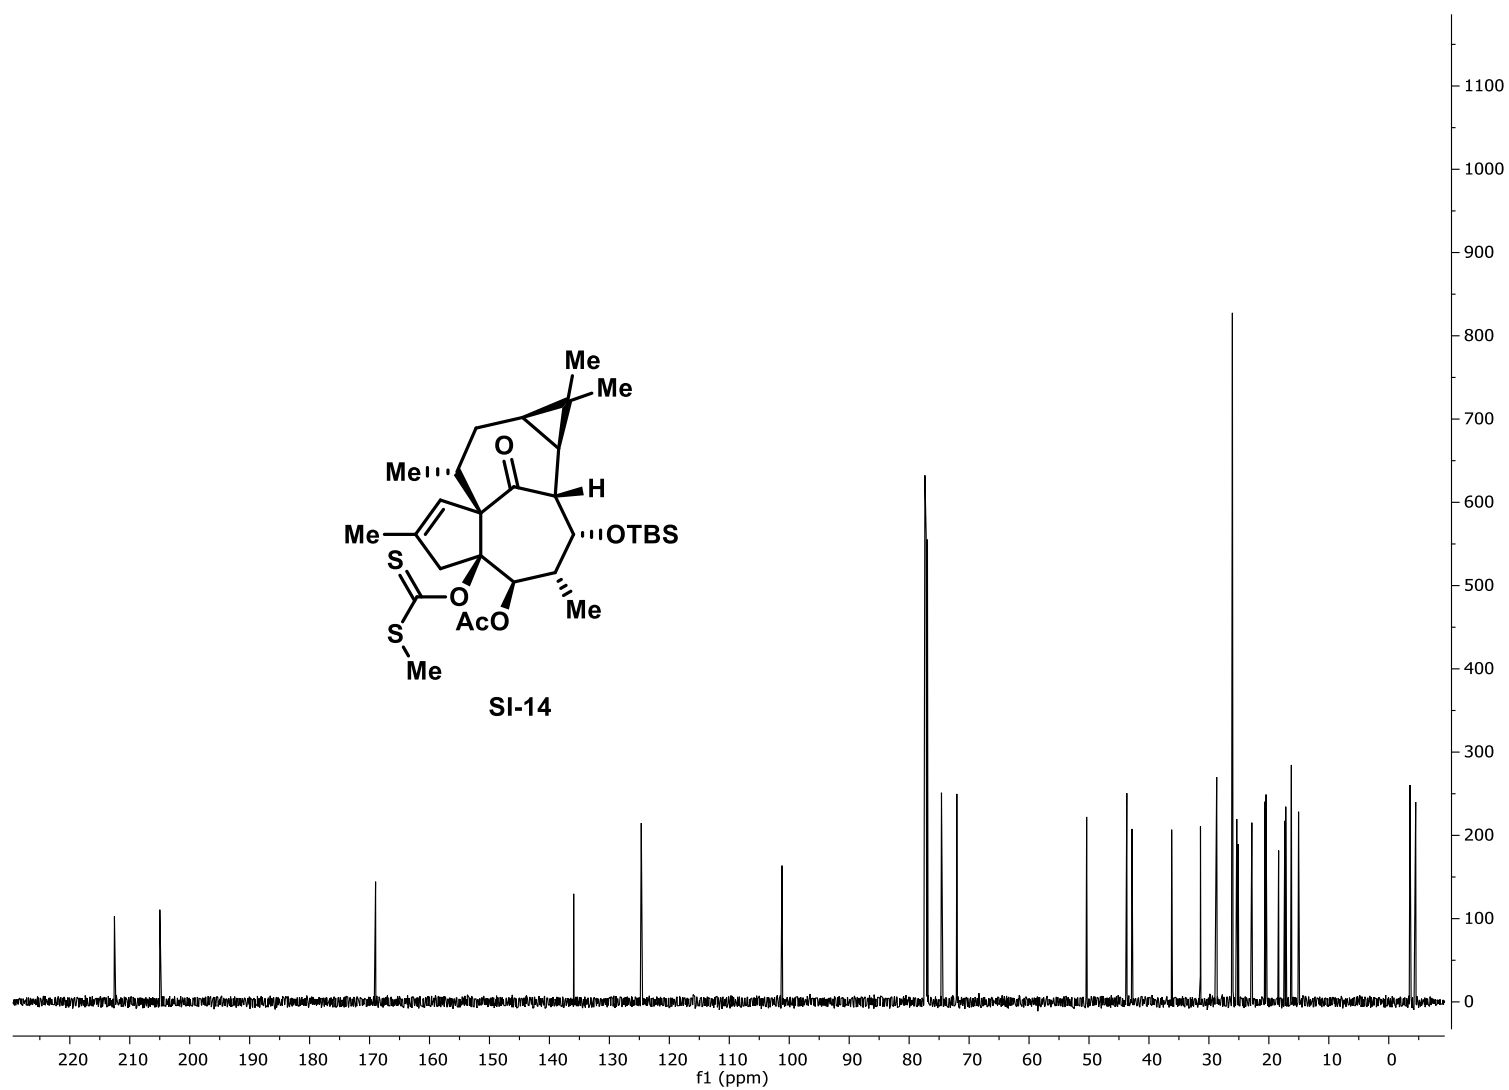

SI-128

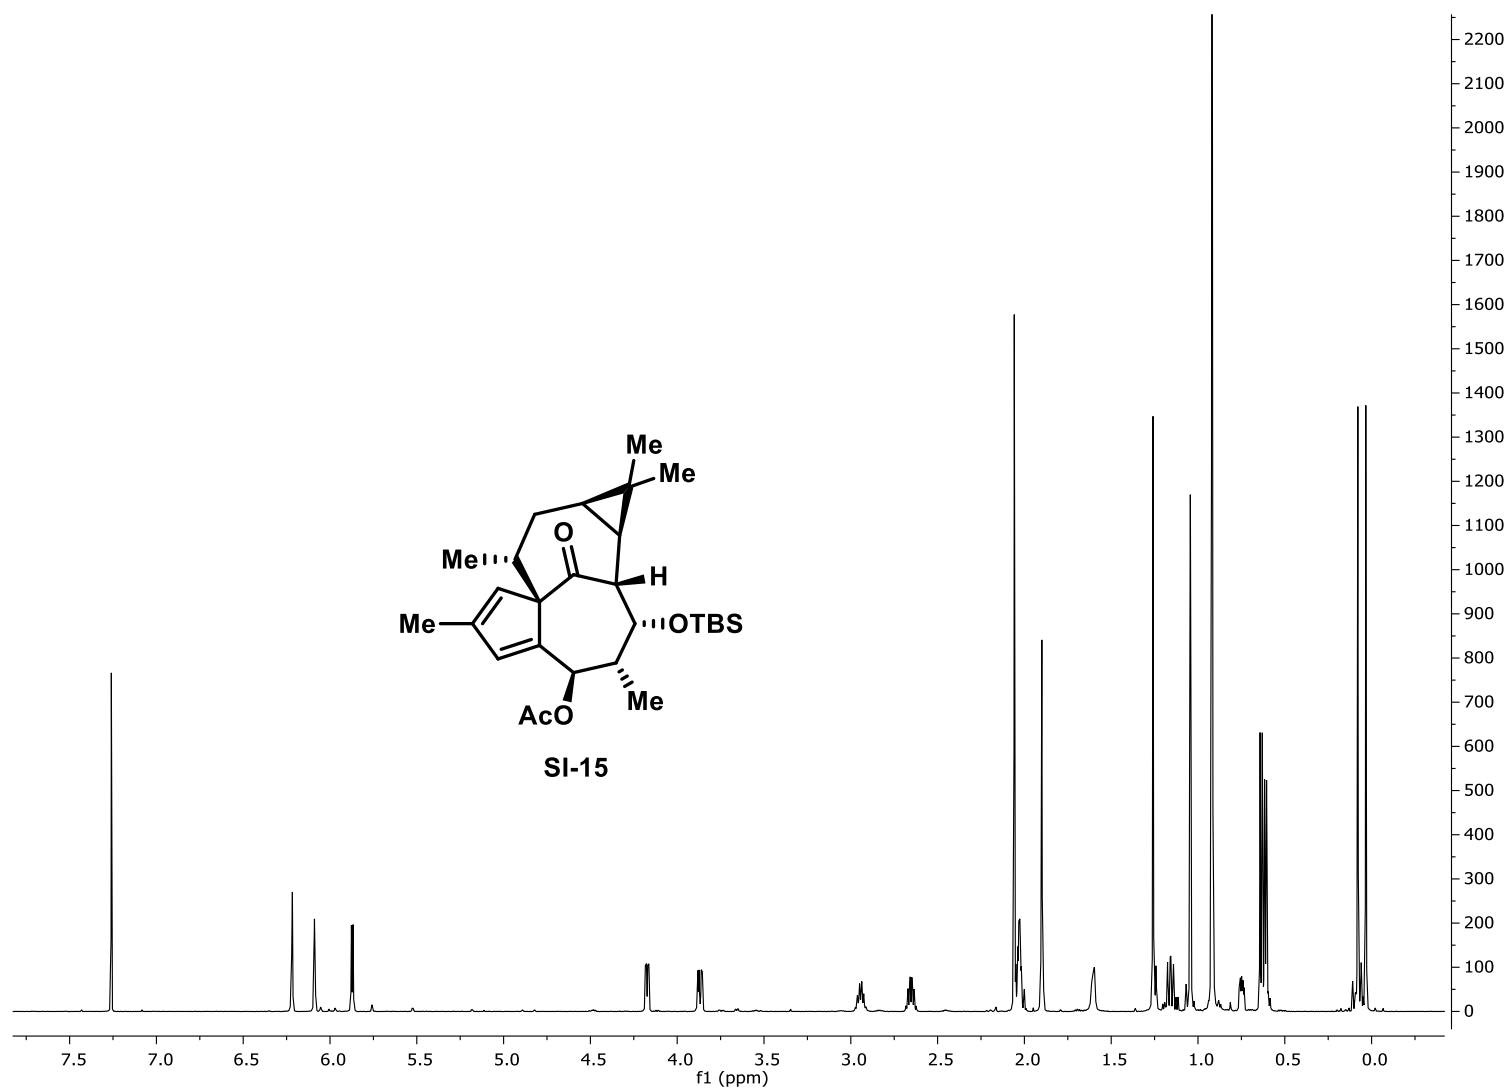

SI-129

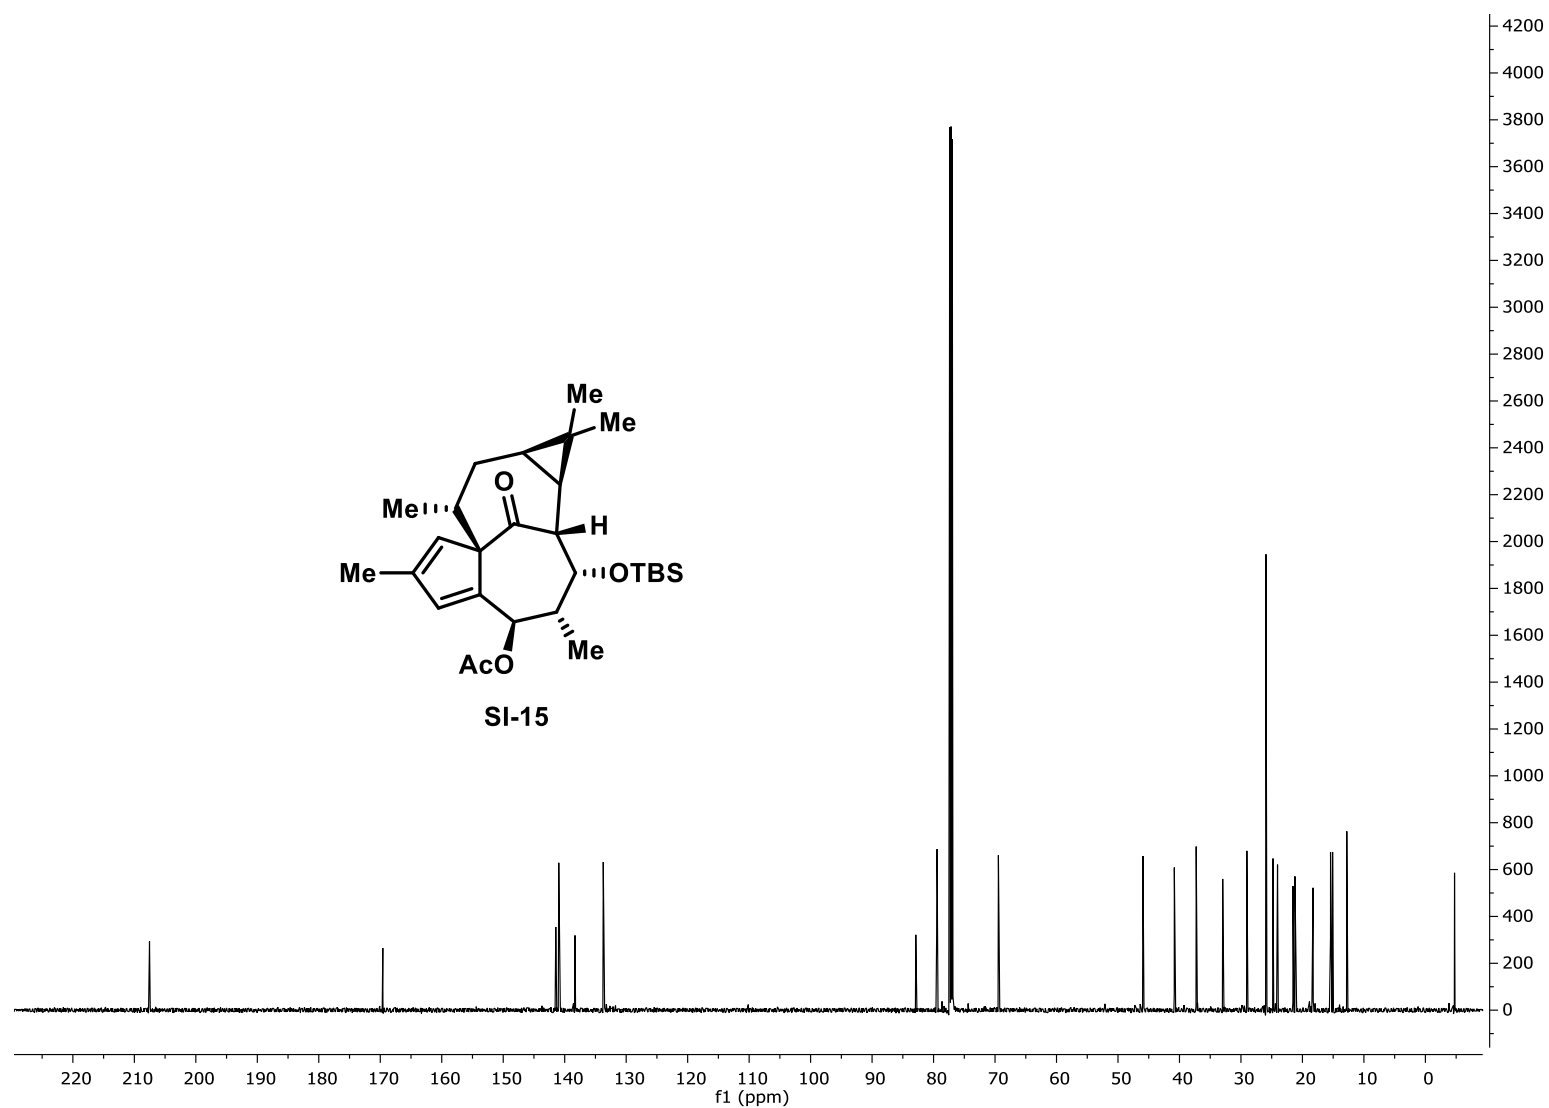

SI-130

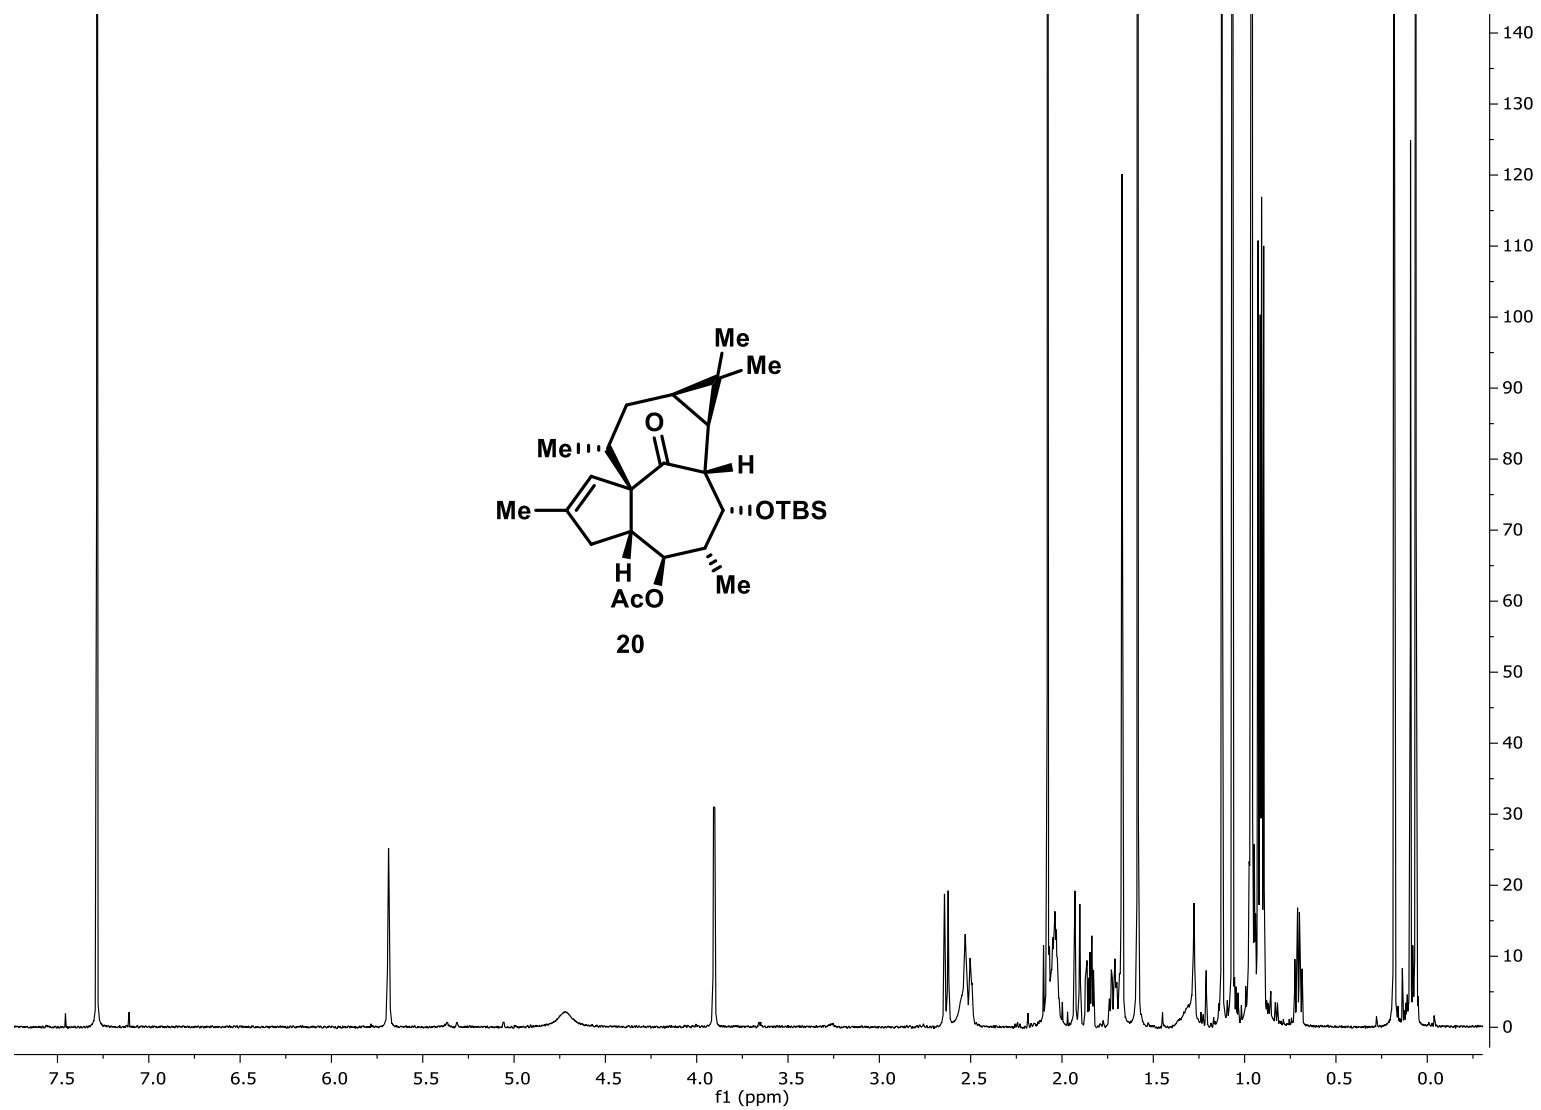

SI-131

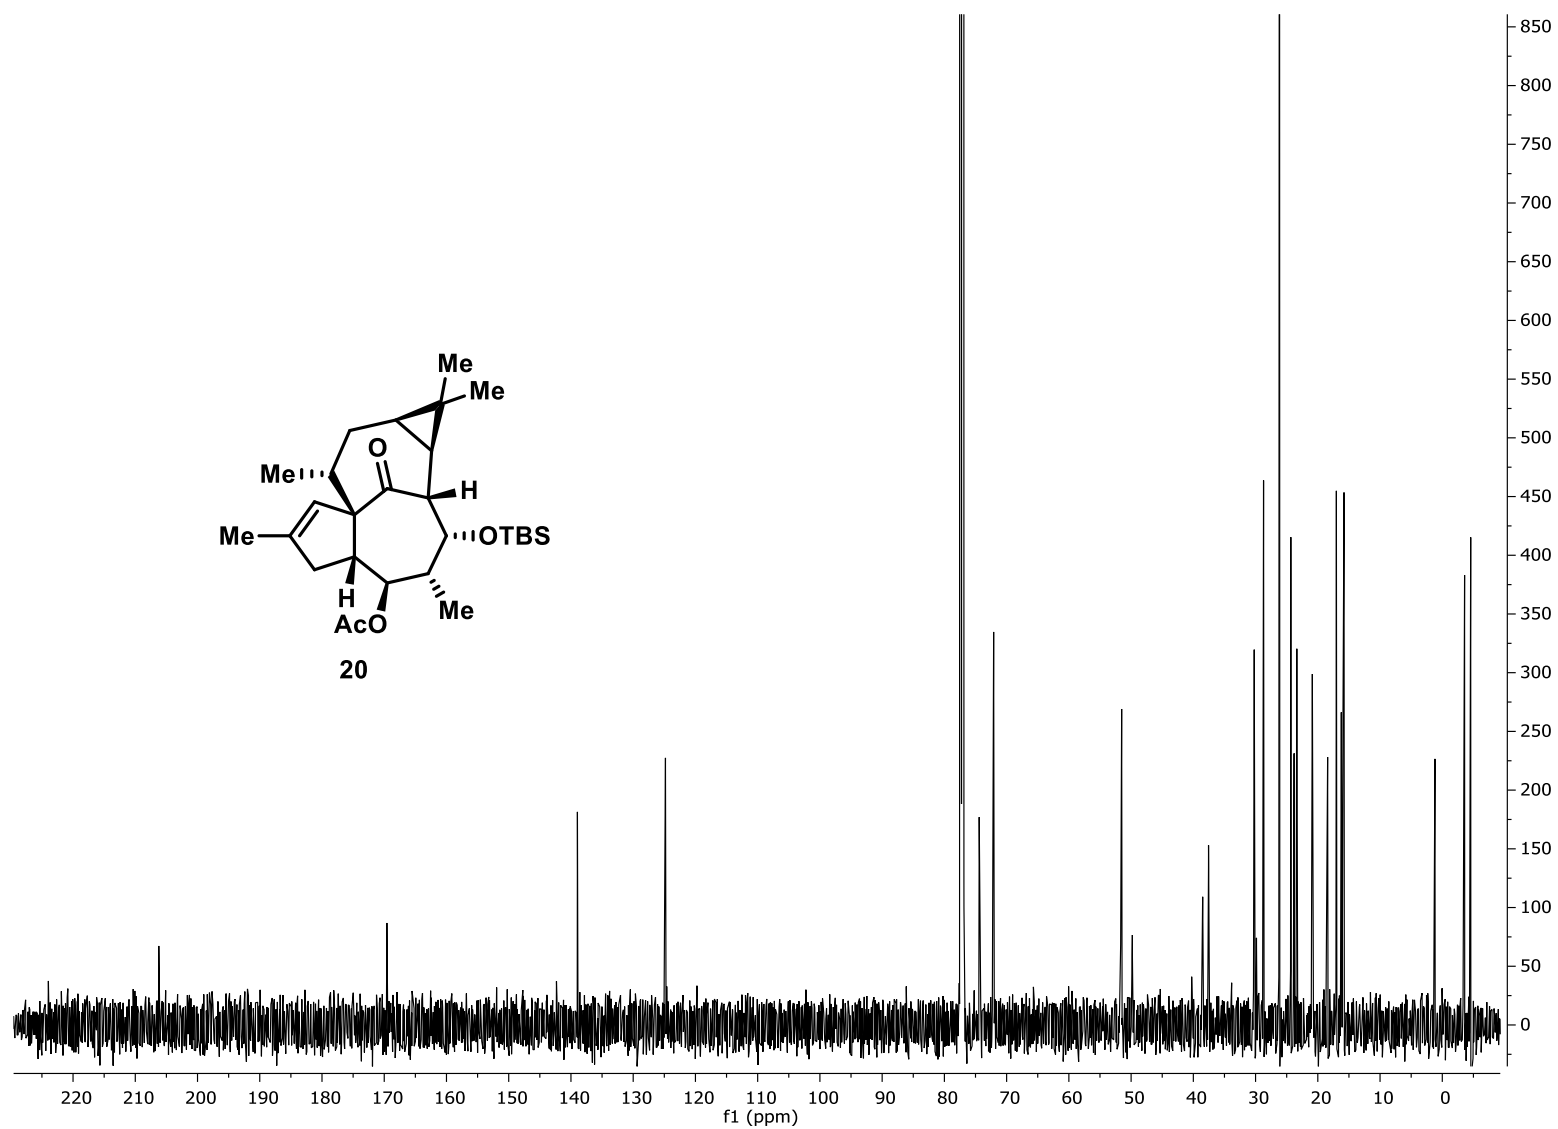

SI-132

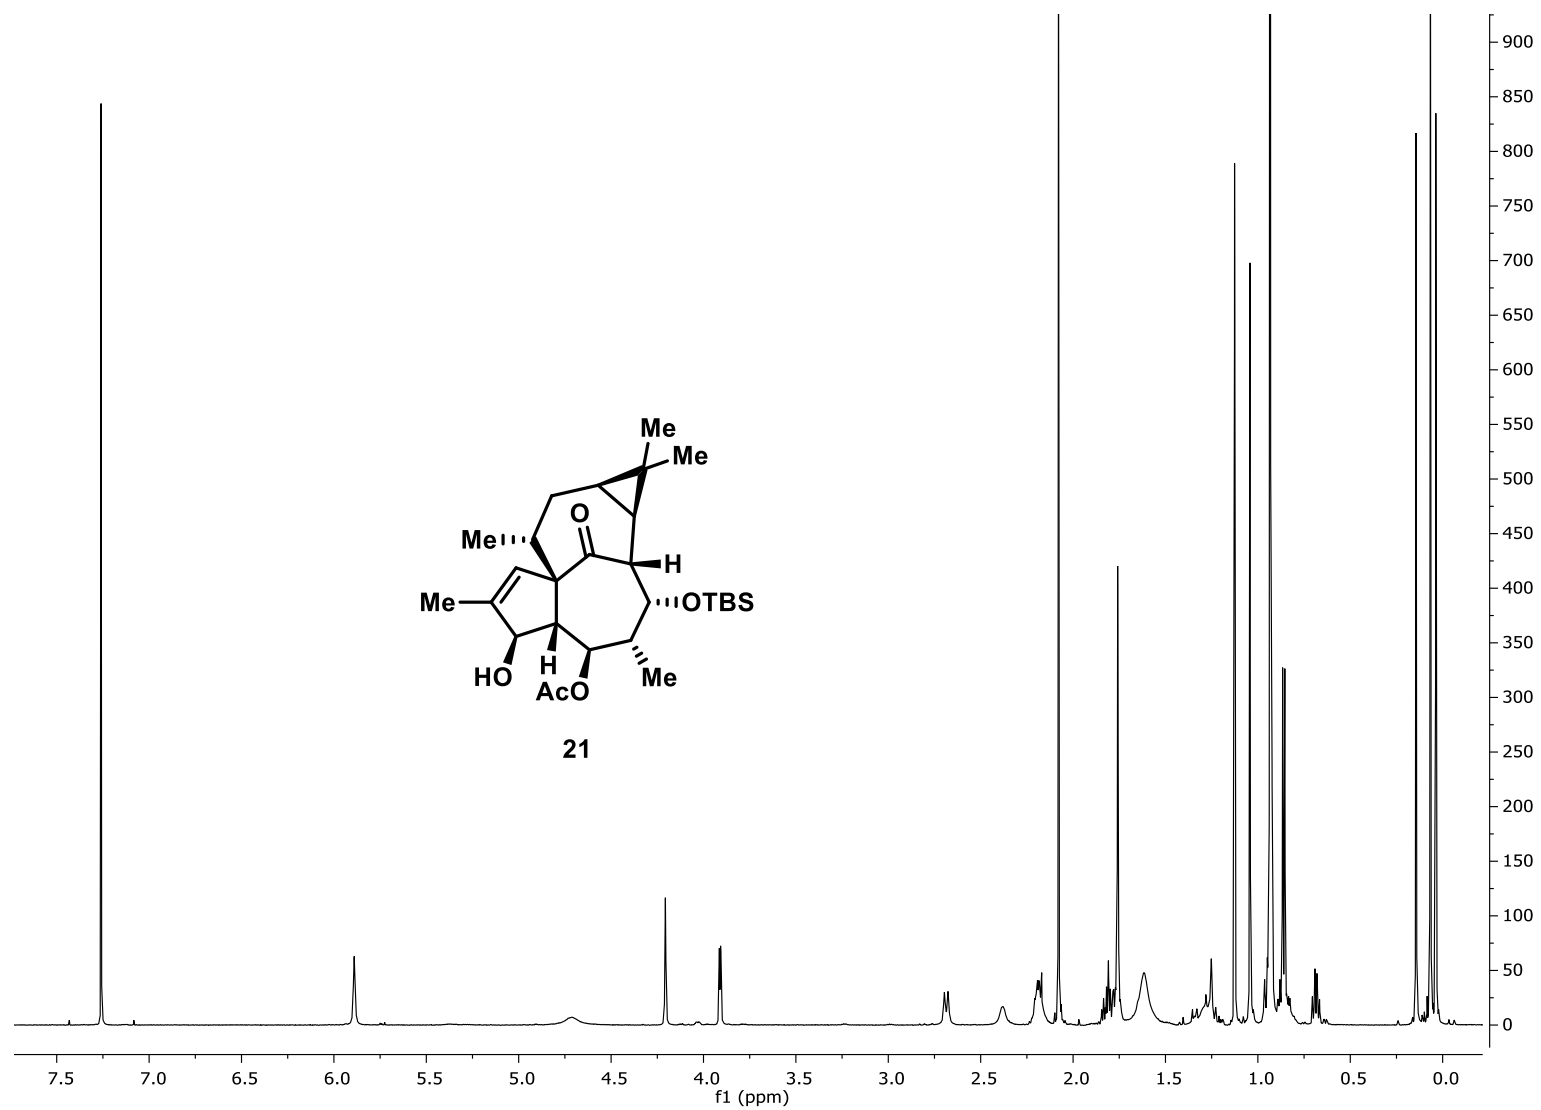

SI-133

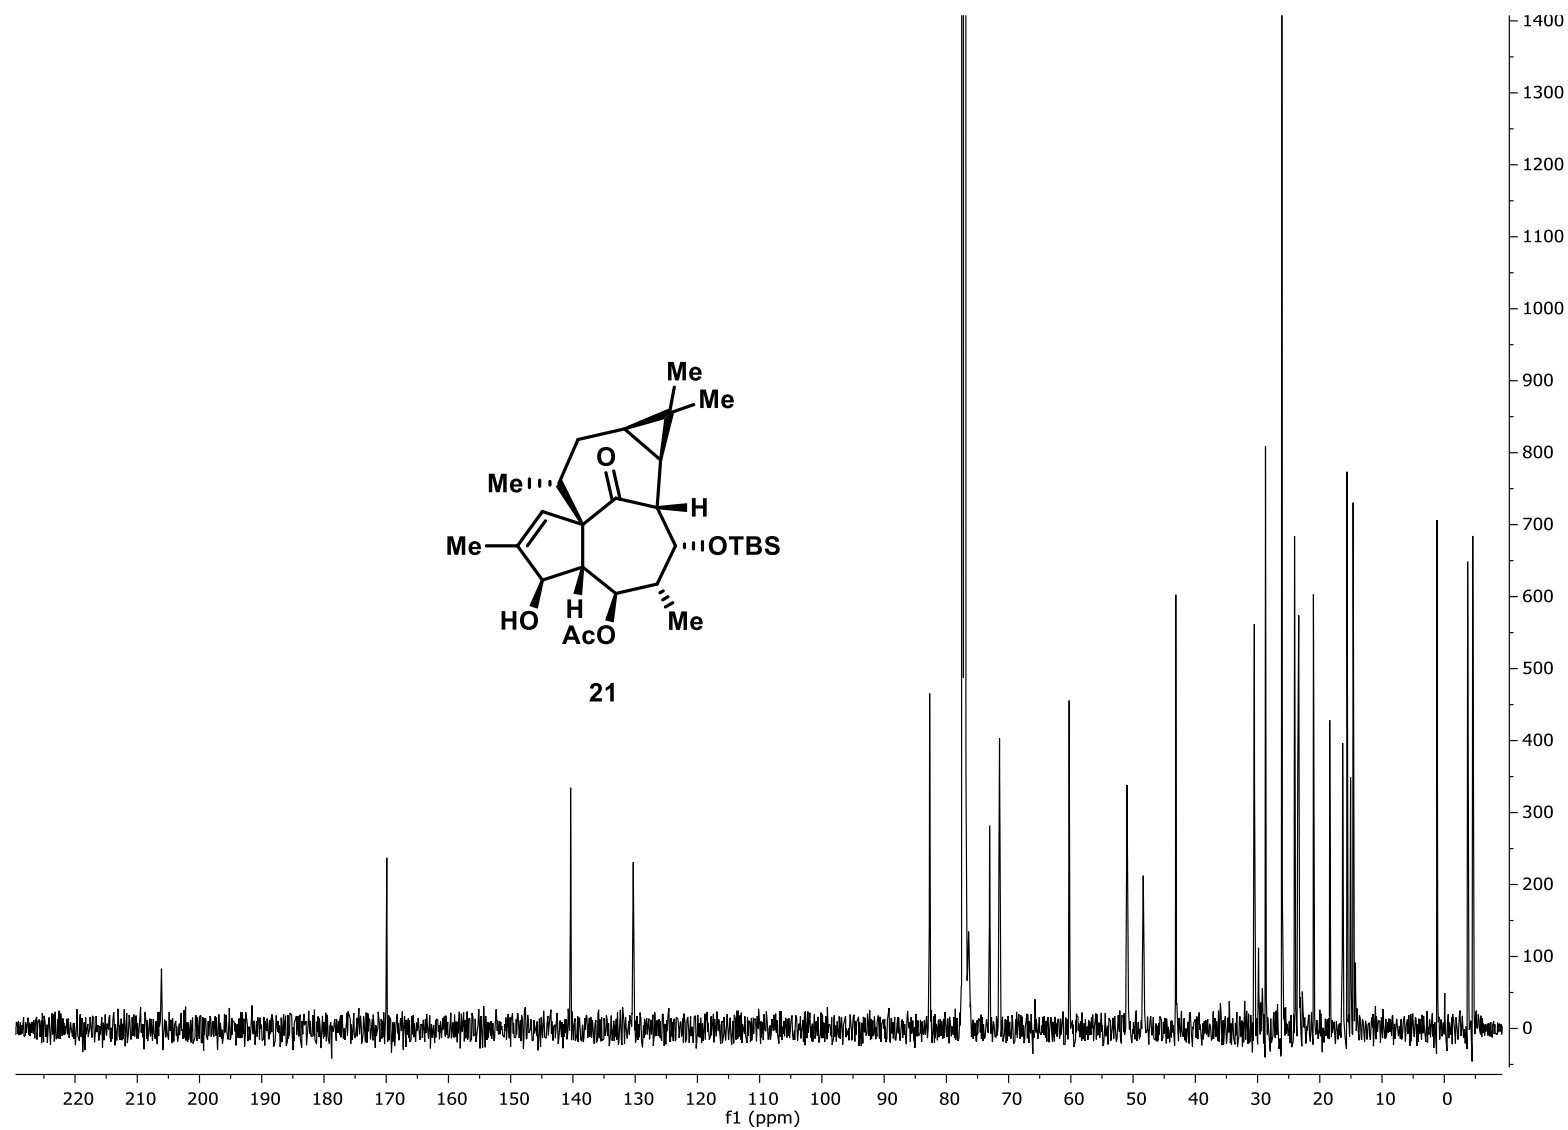

SI-134

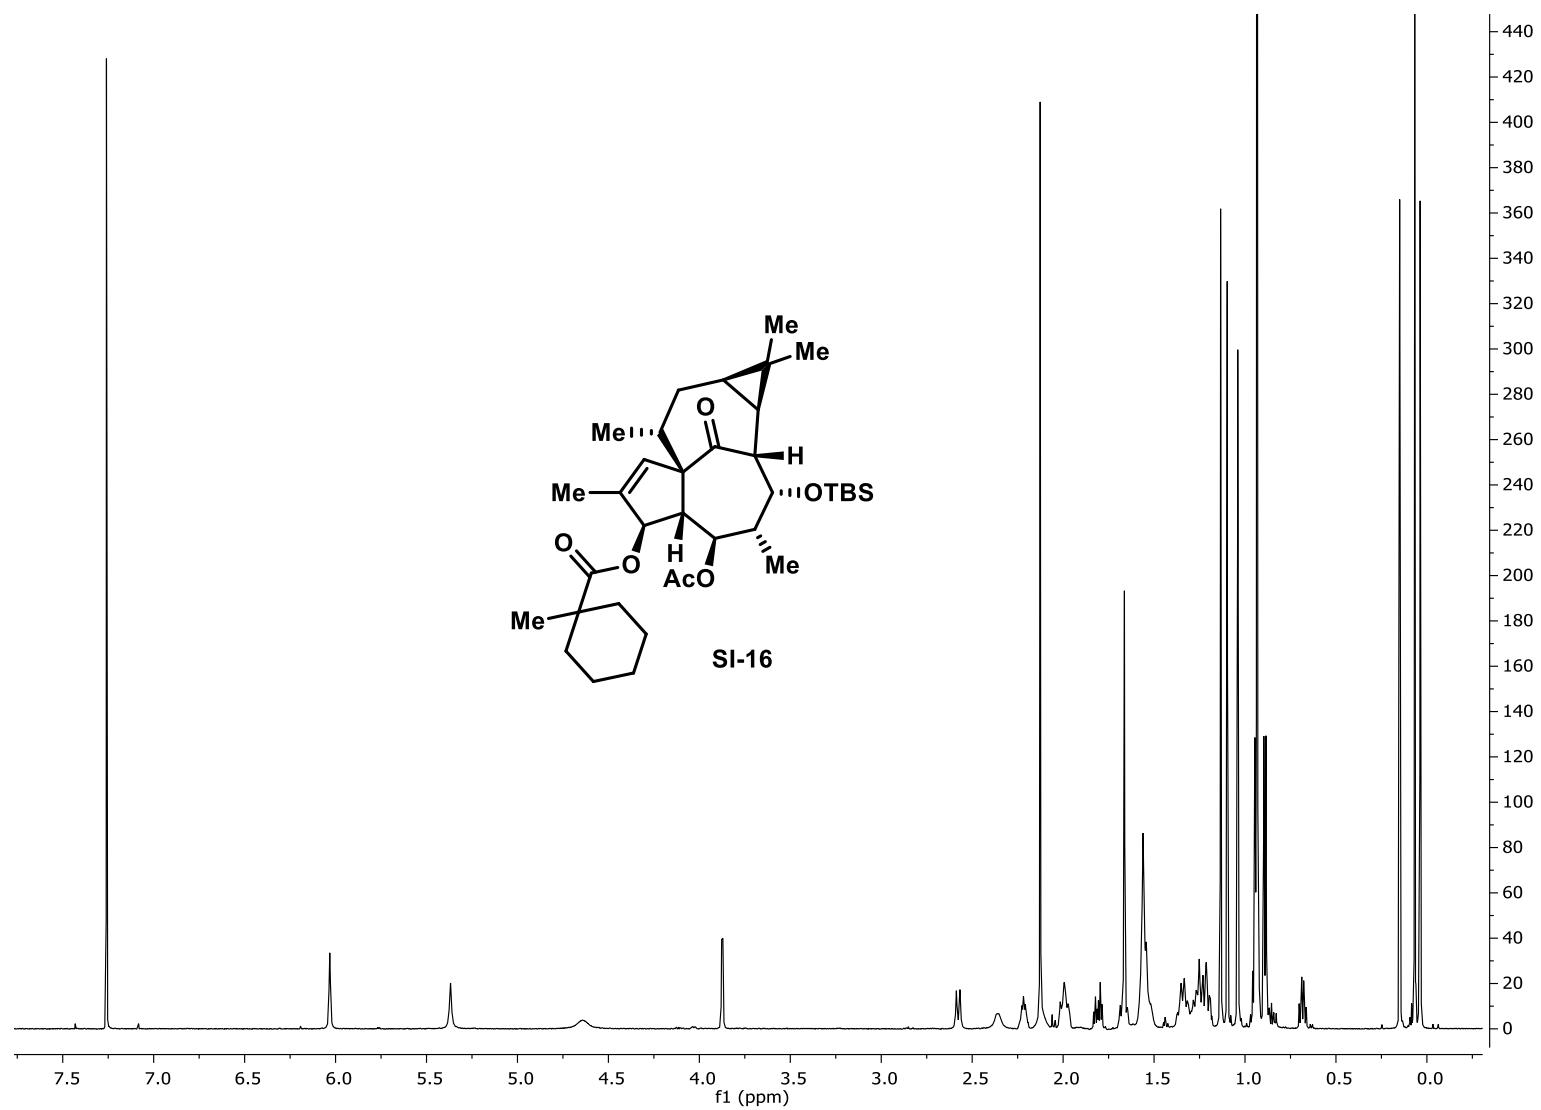

SI-135

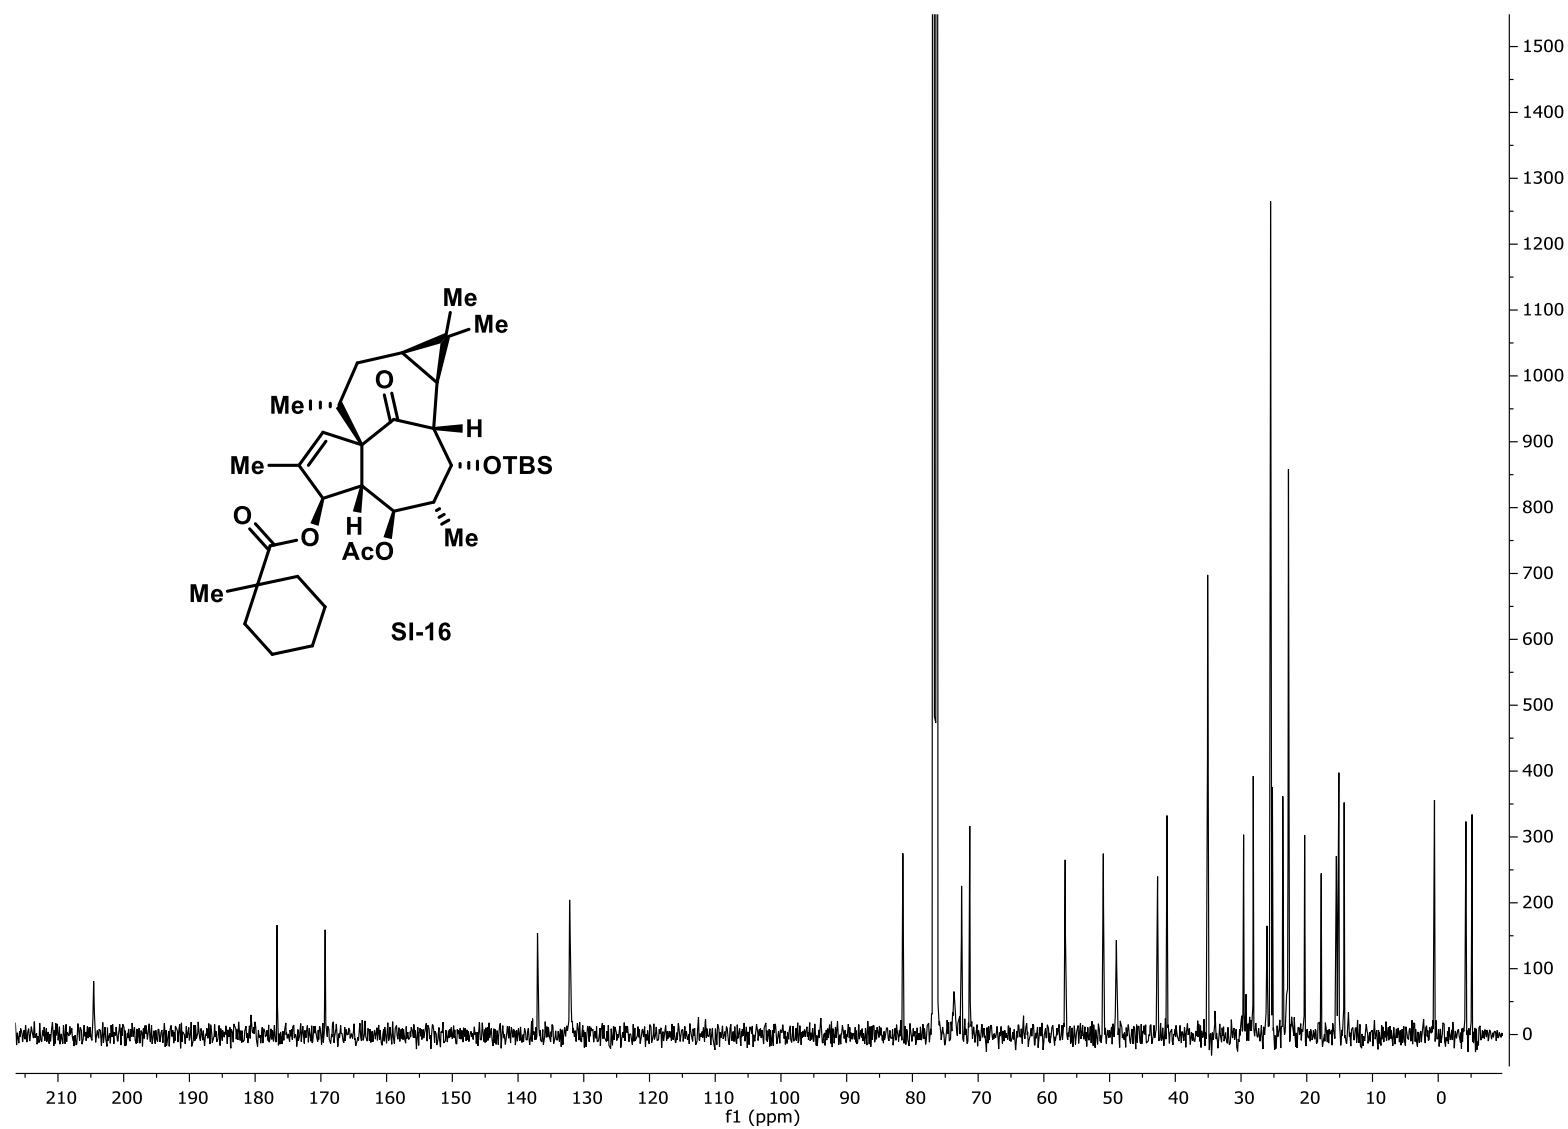

SI-136

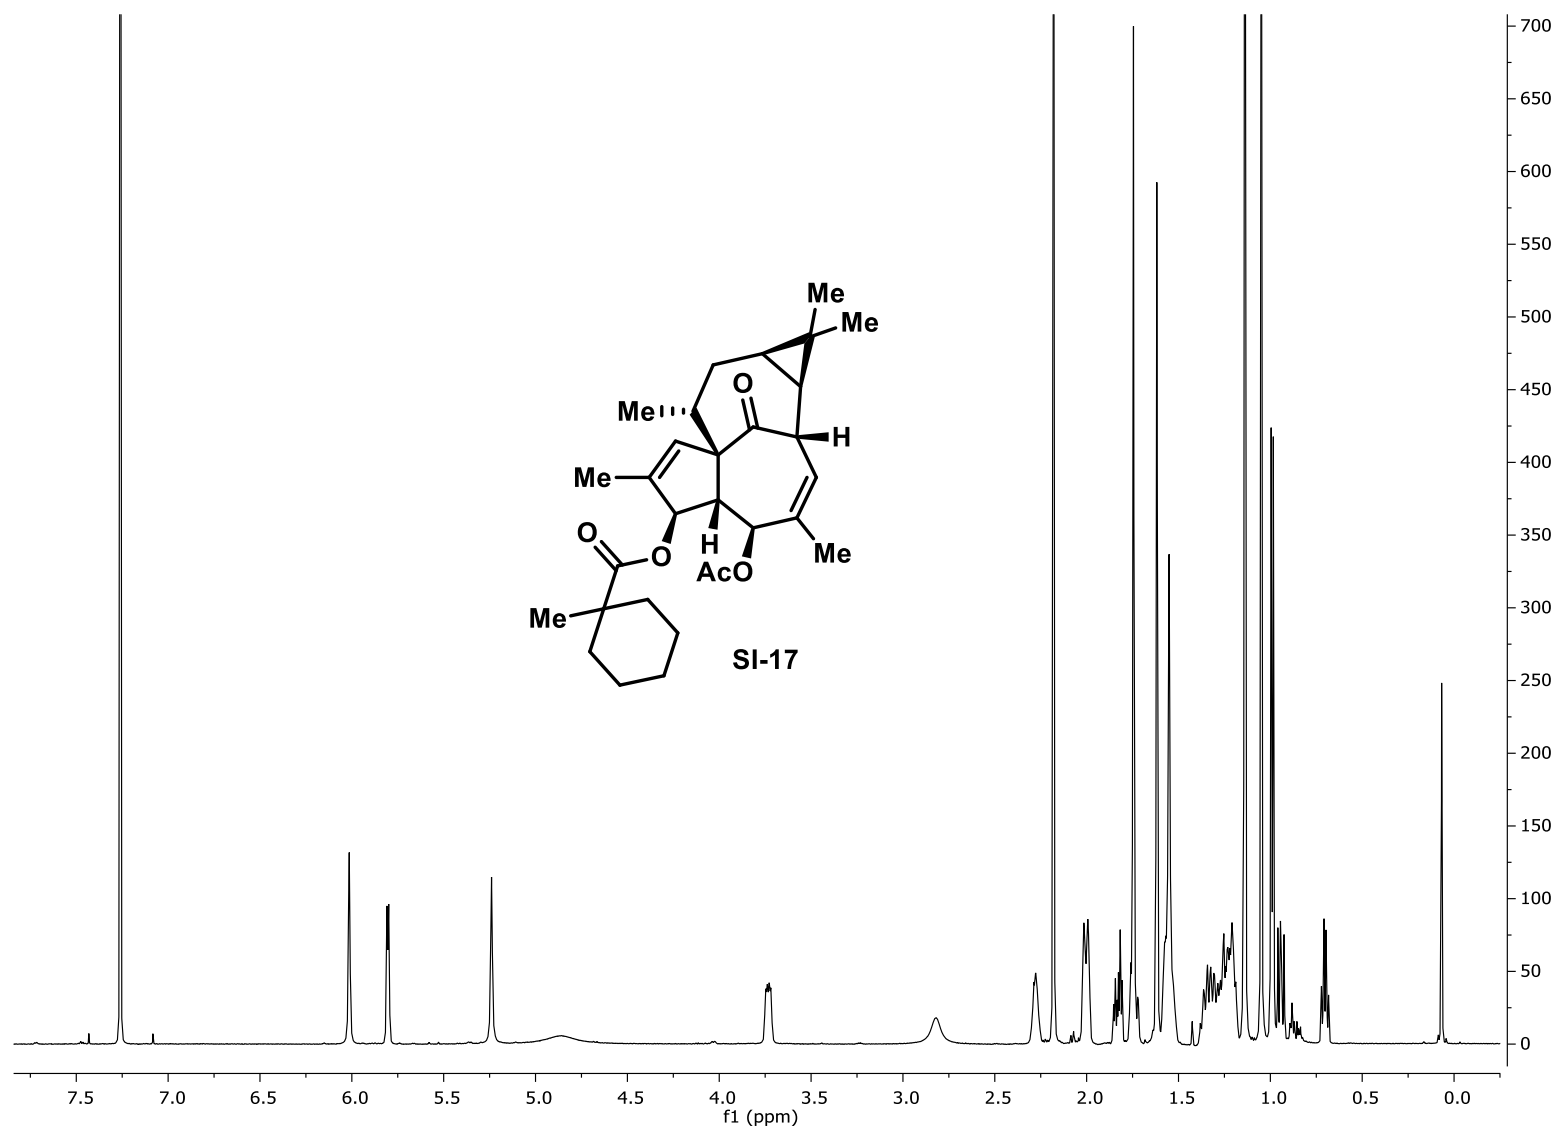

SI-137

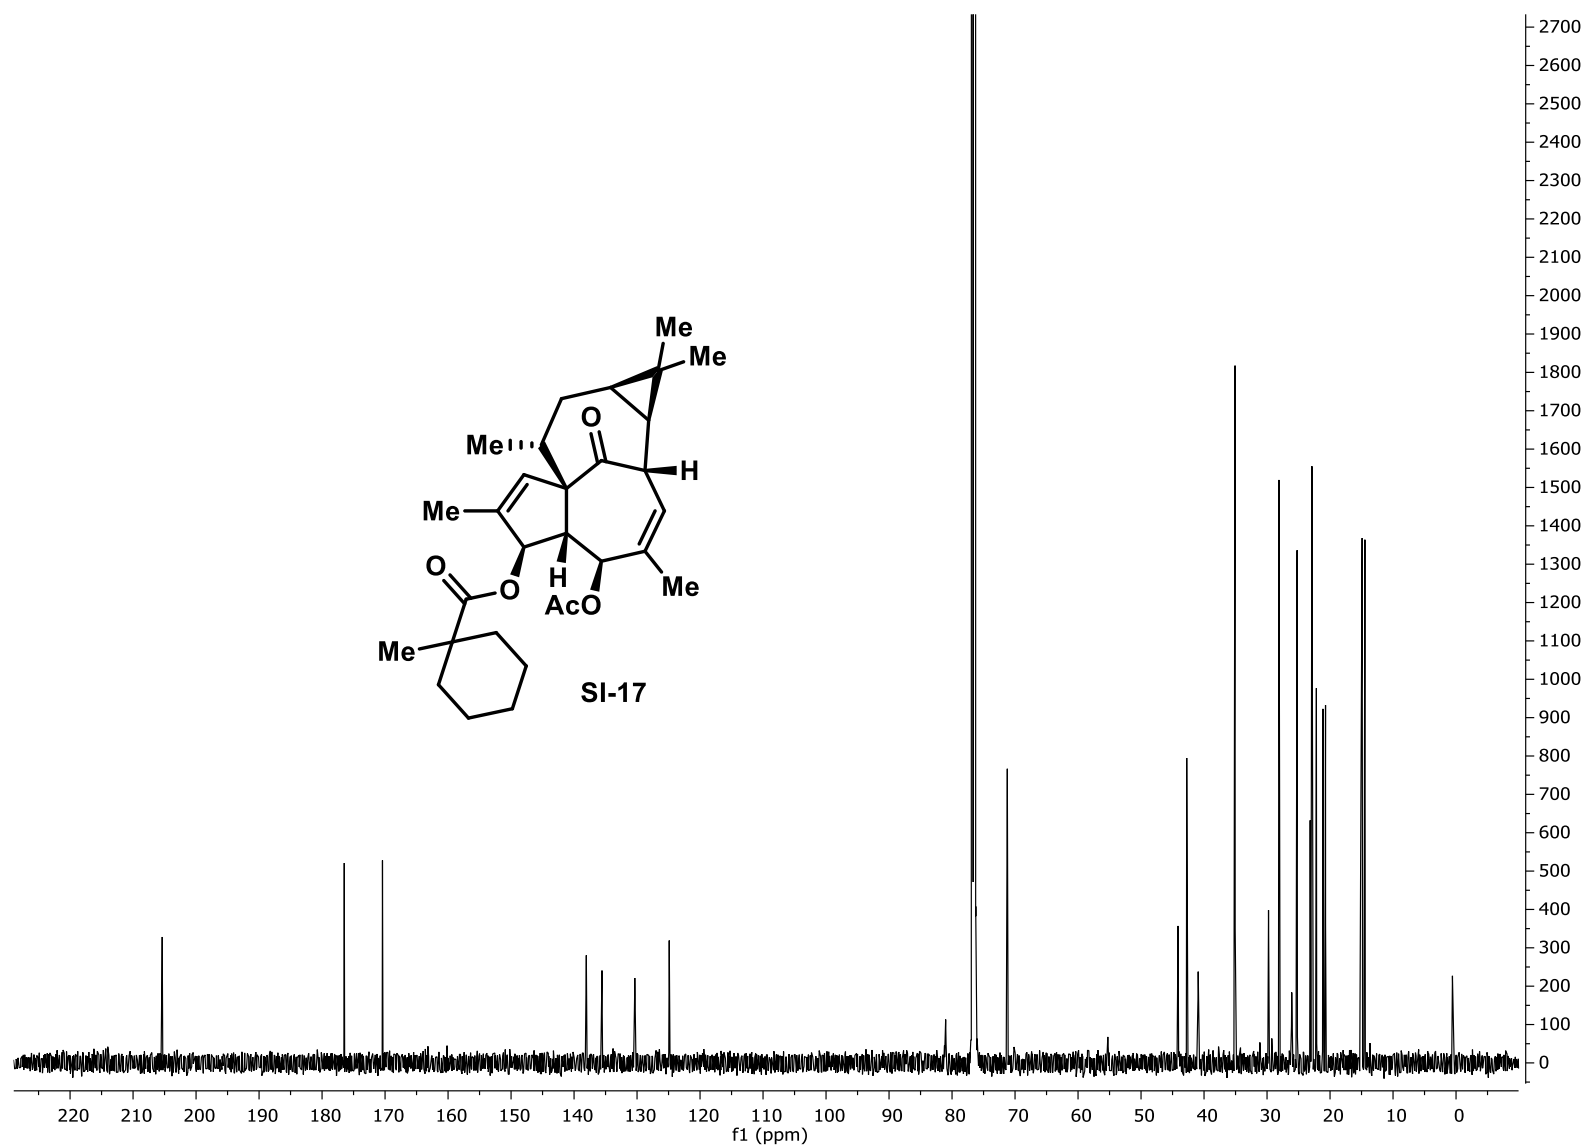

SI-138

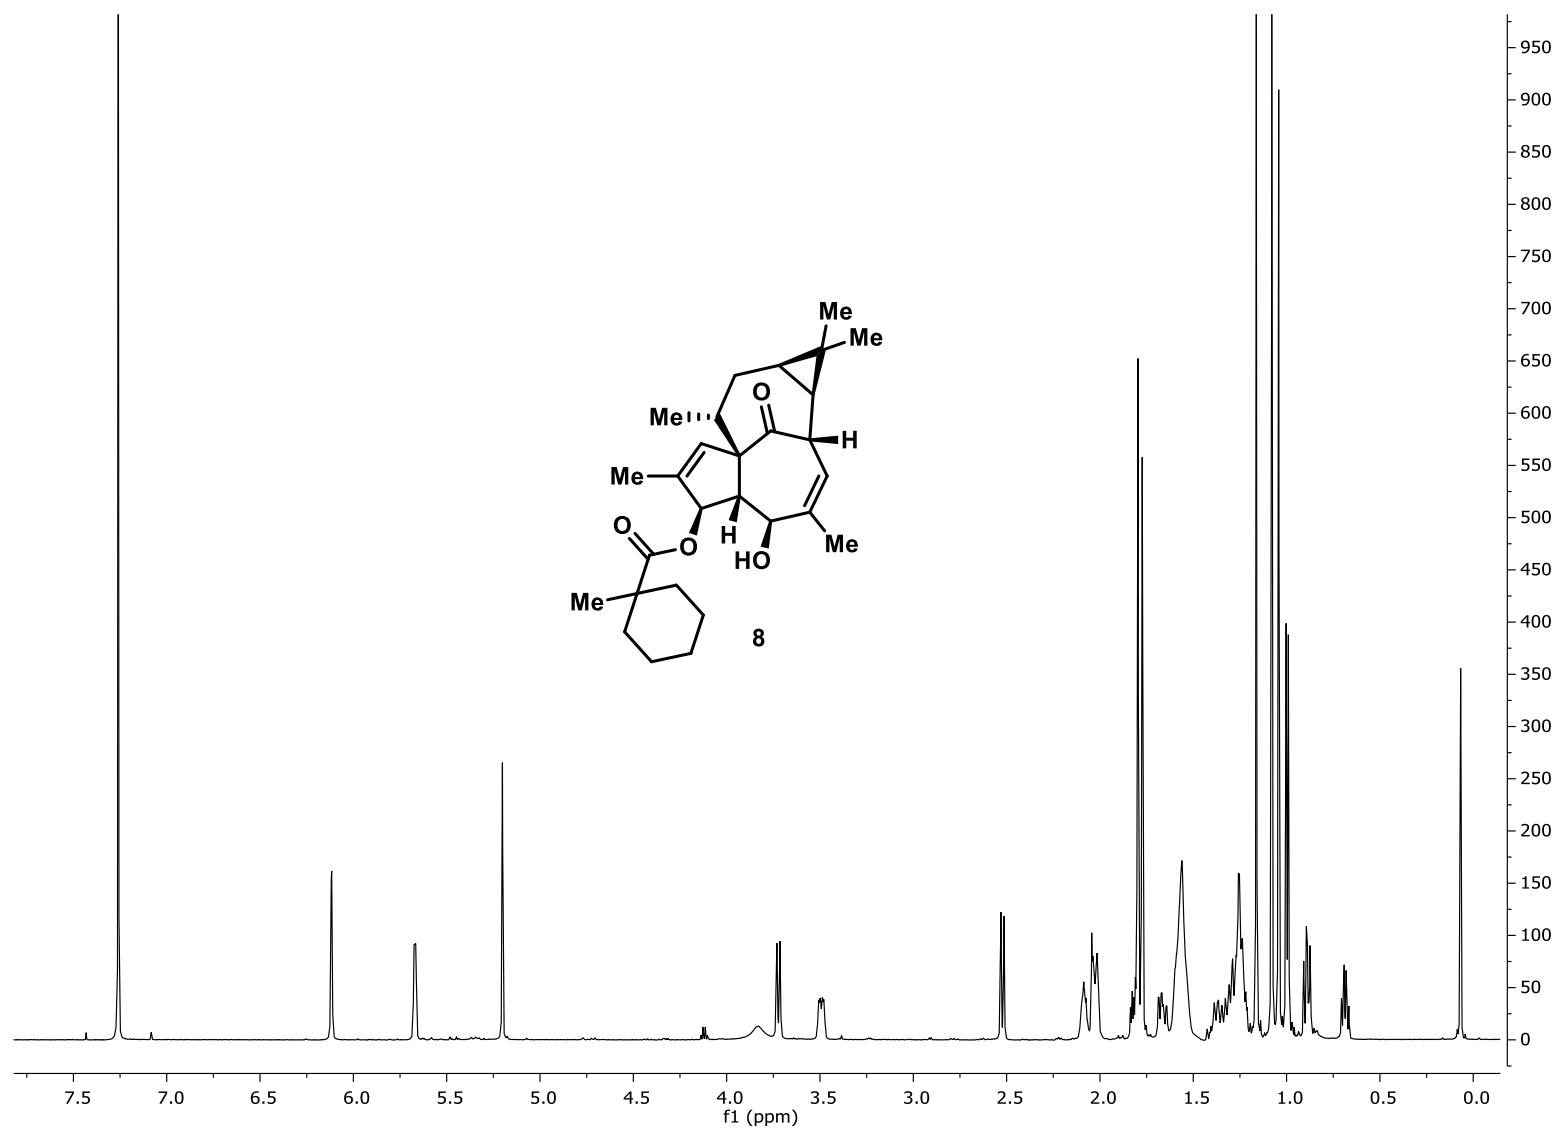

SI-139

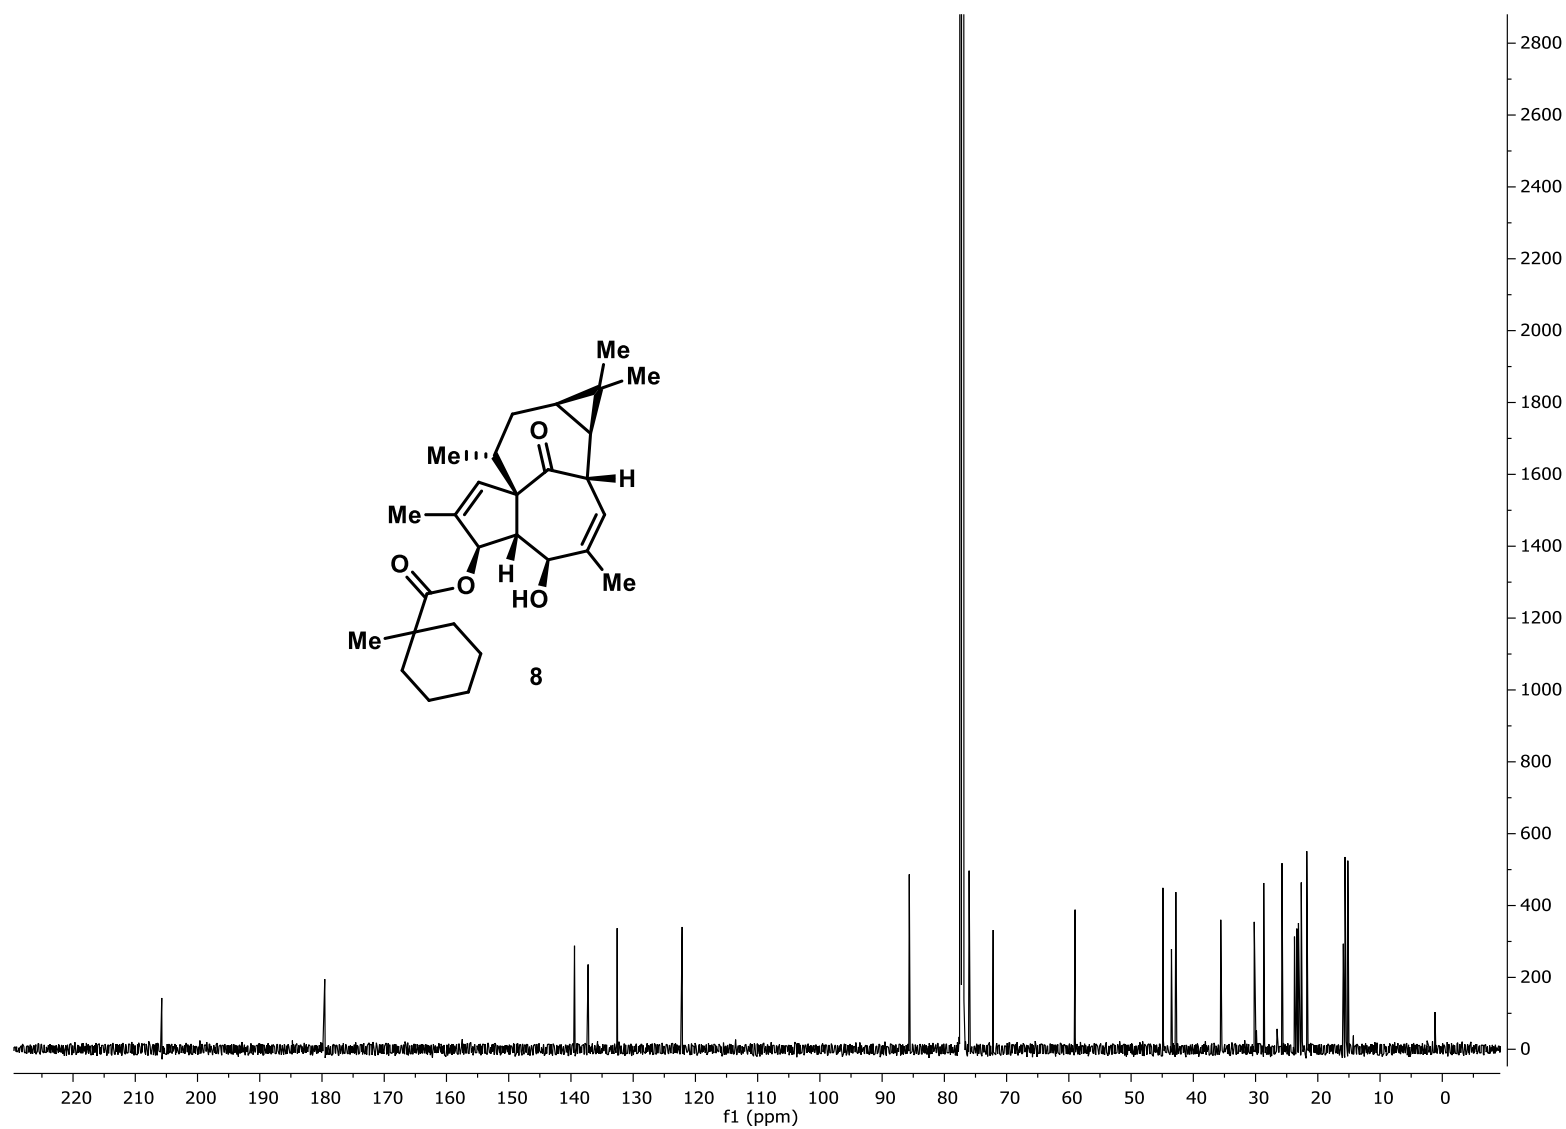

SI-140

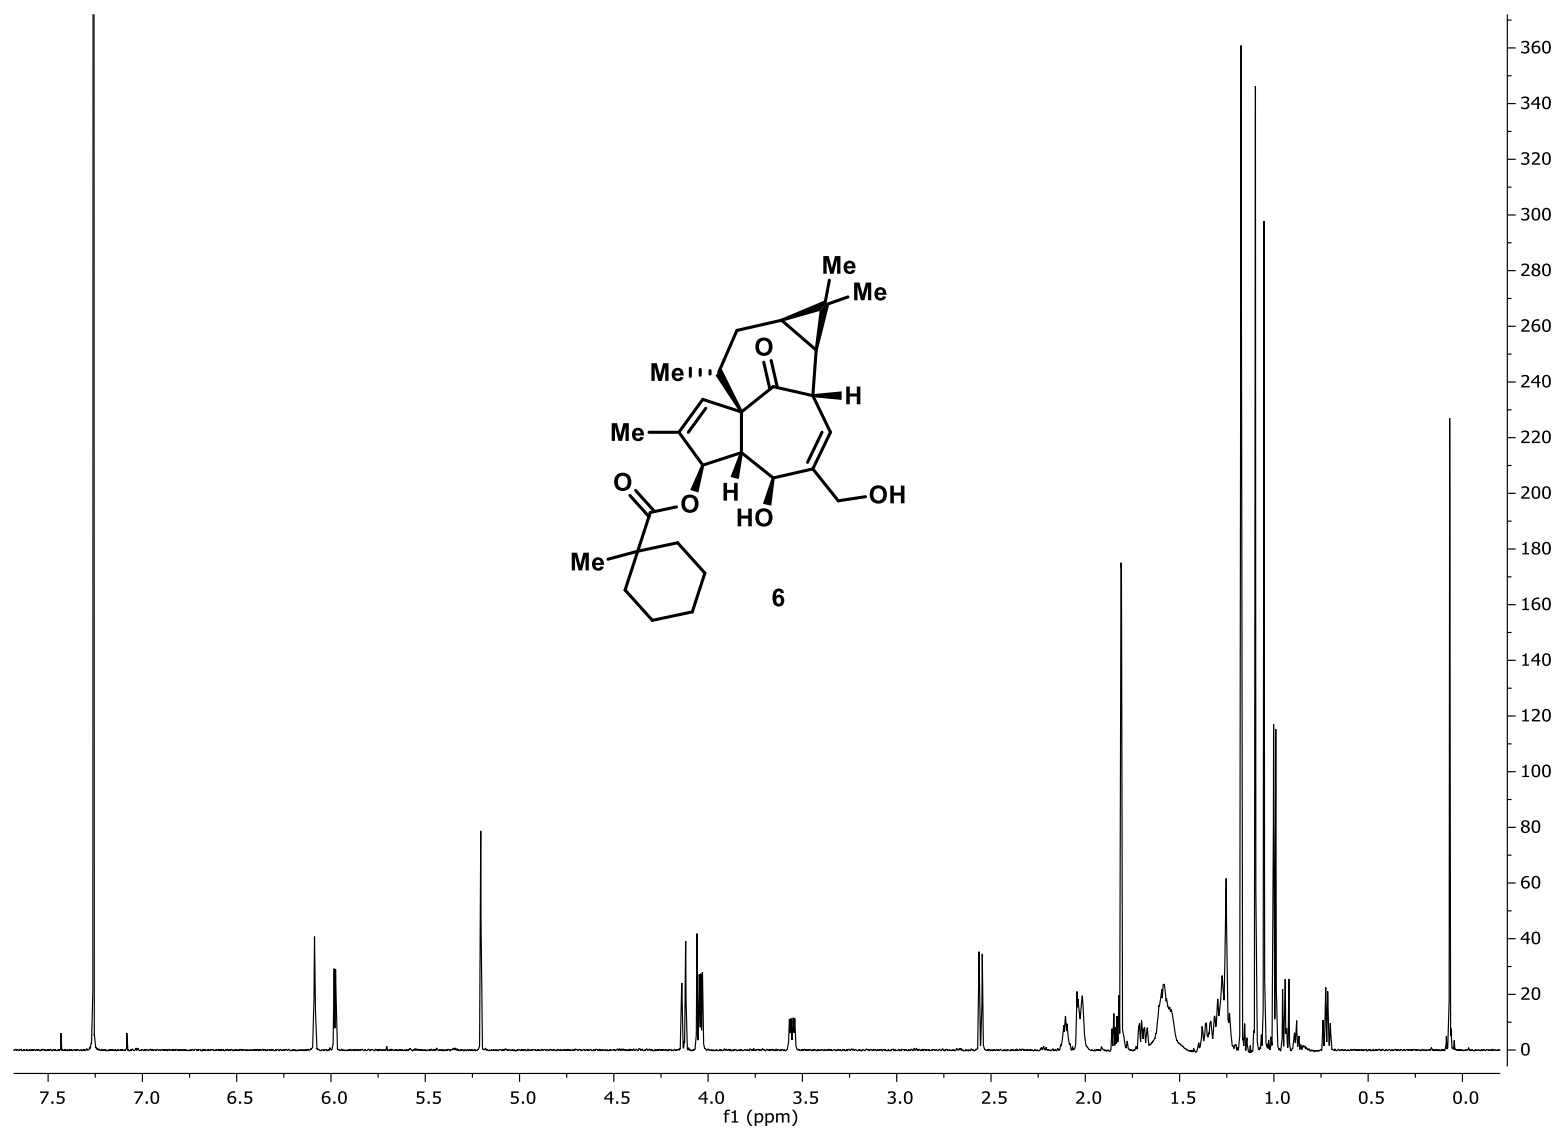

SI-141

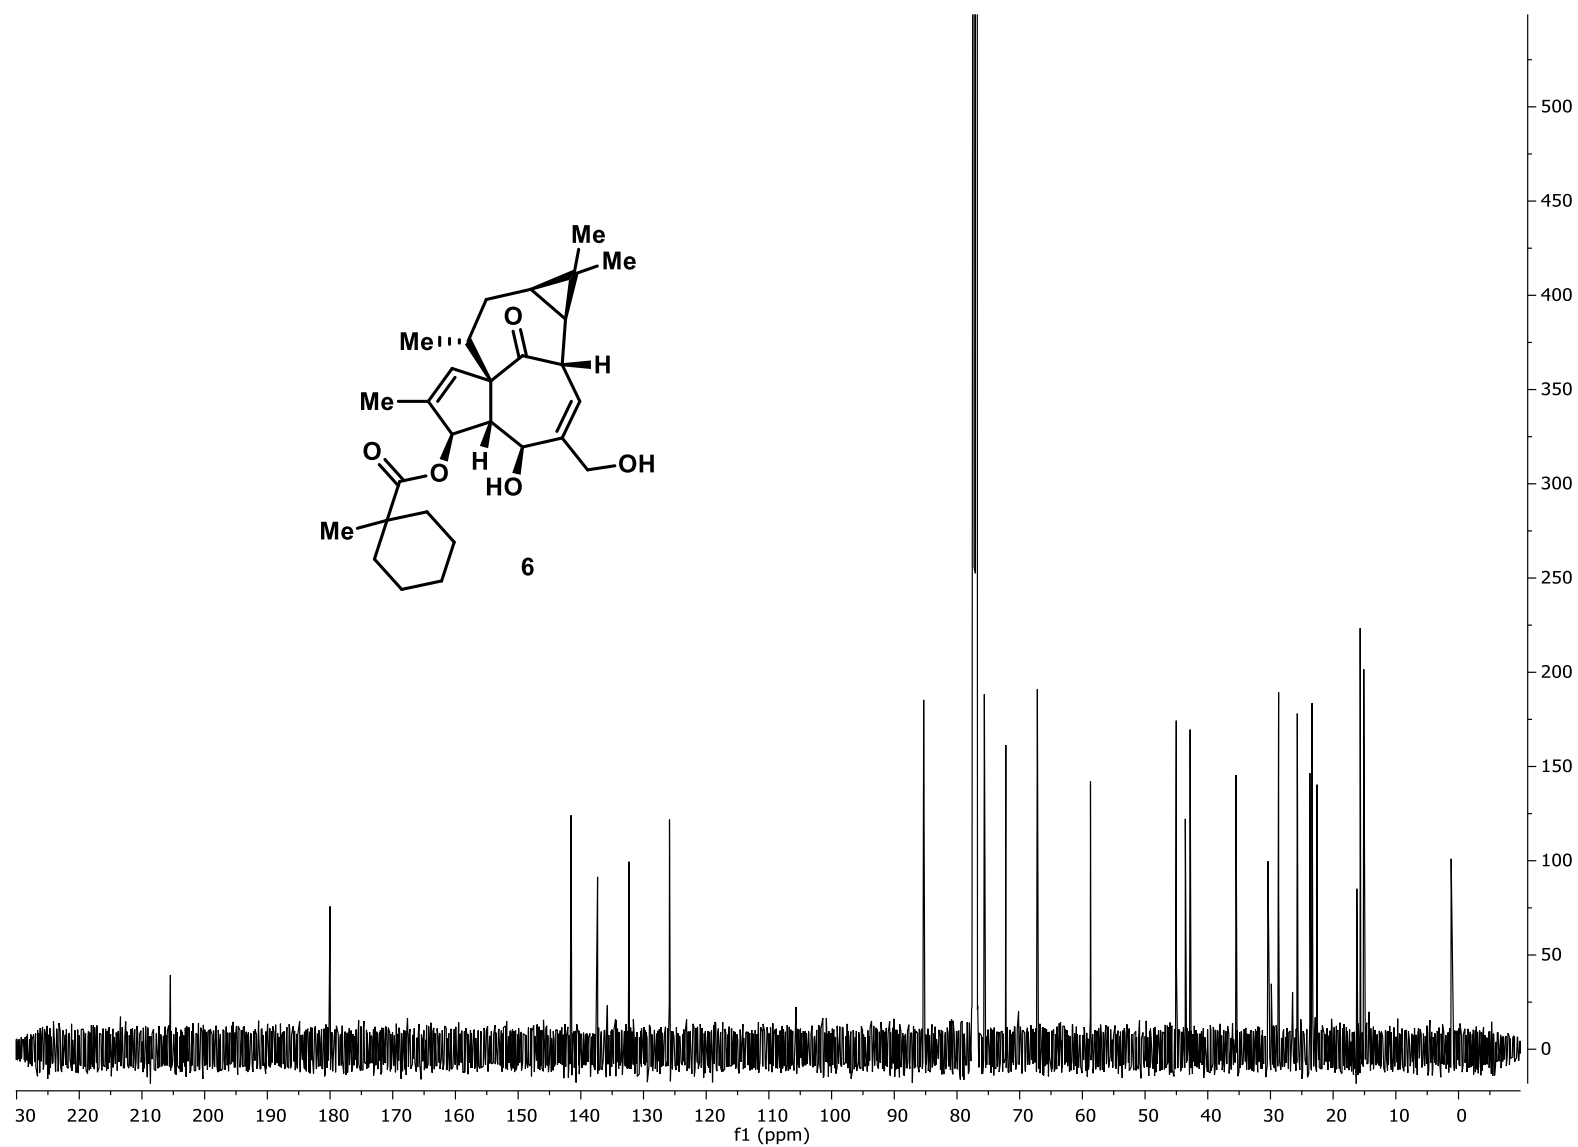

SI-142

# 2D NOESY

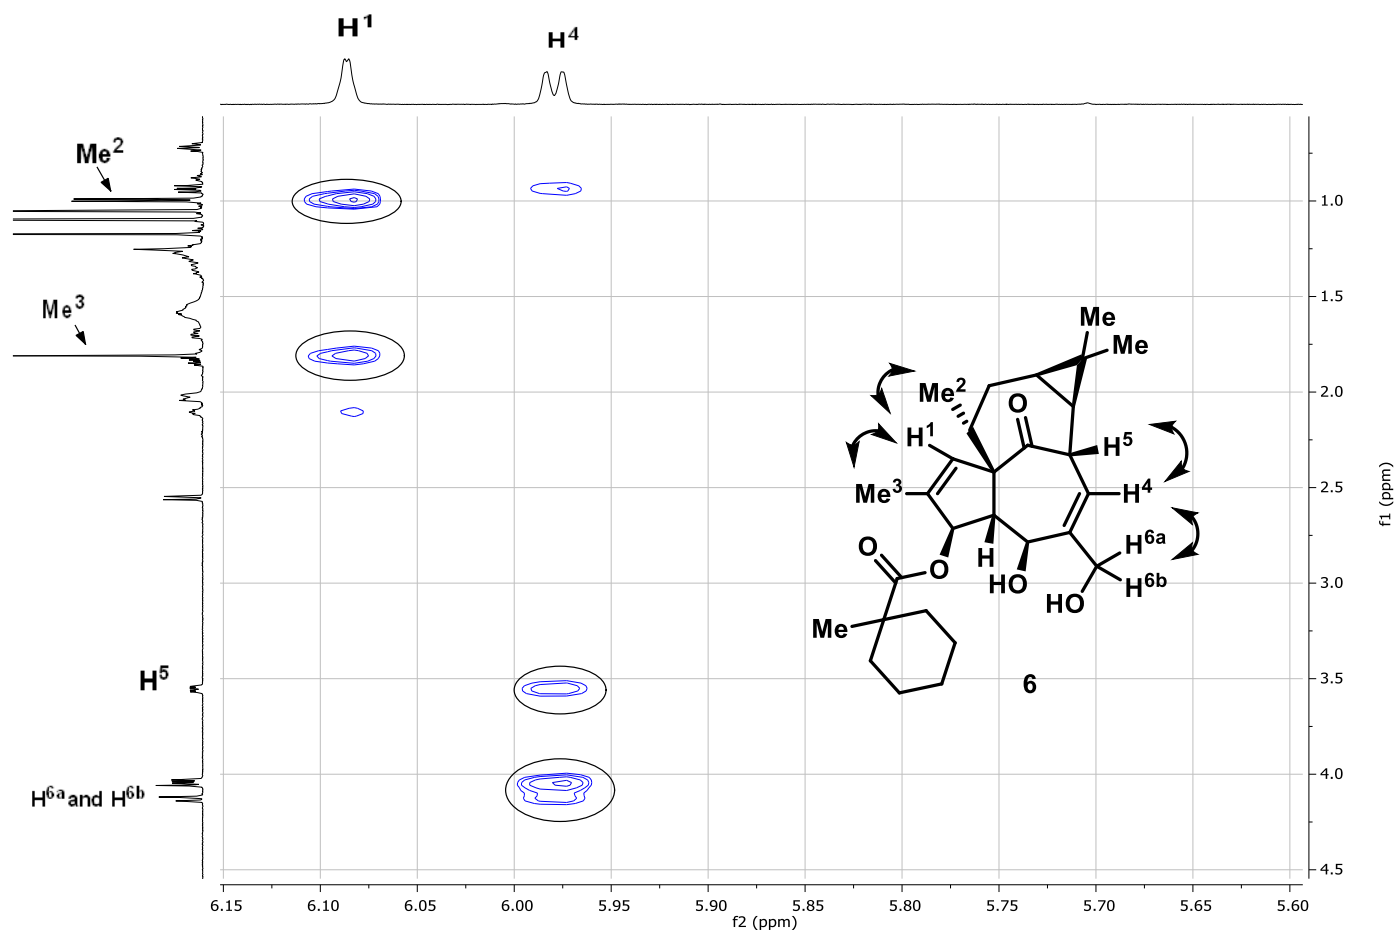

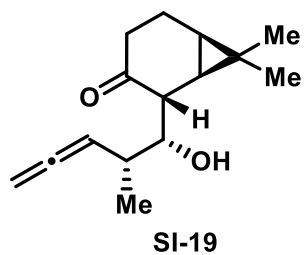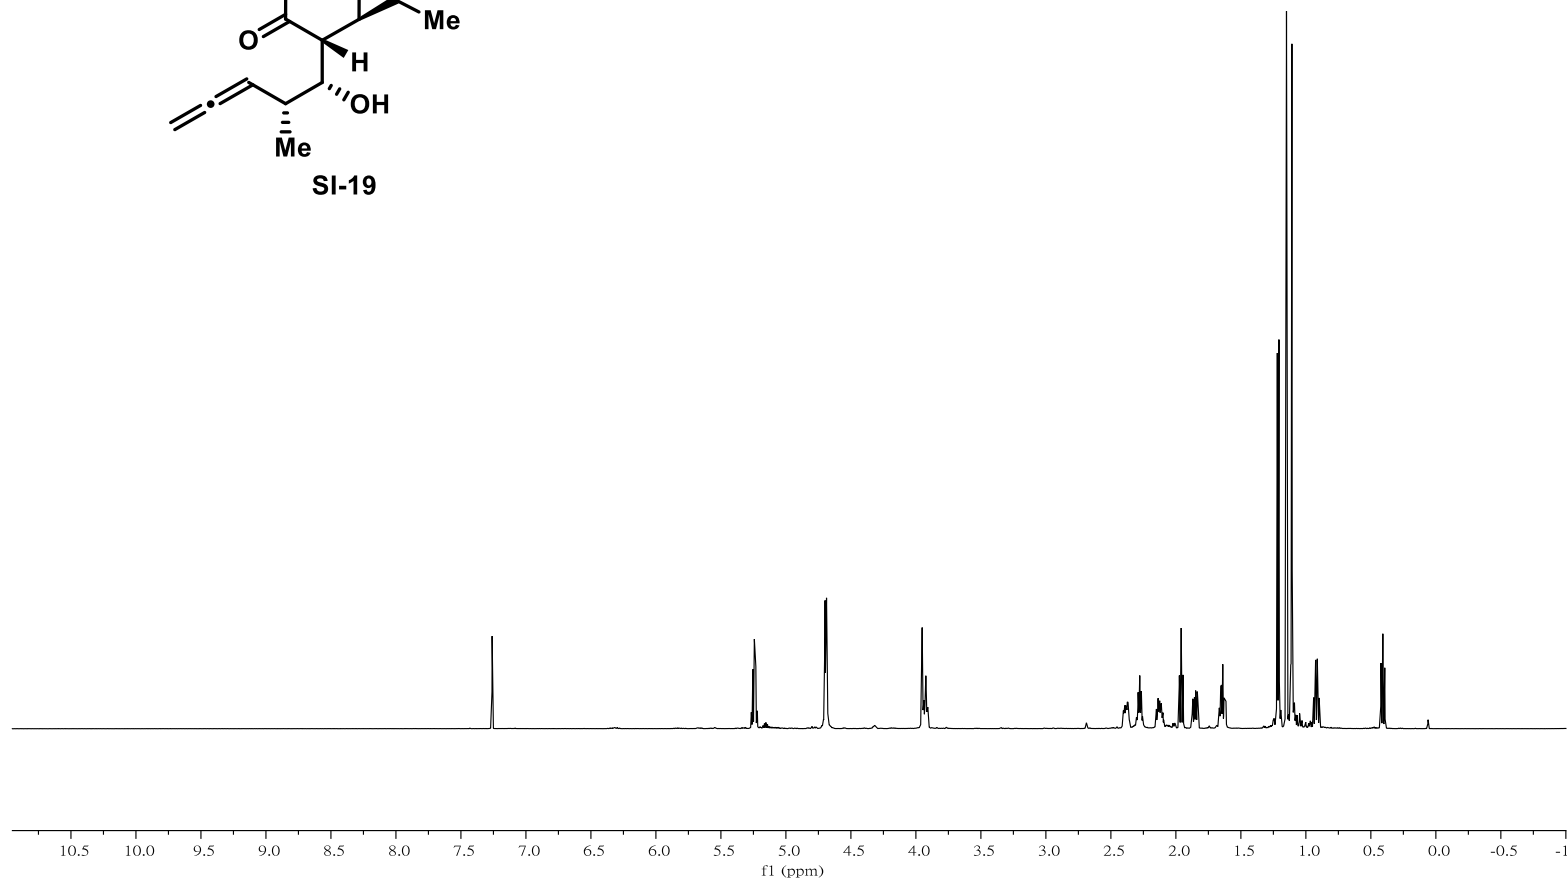

SI-144

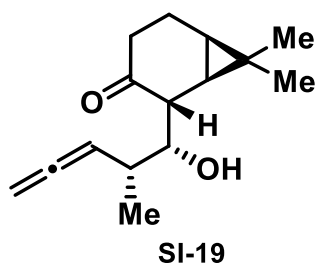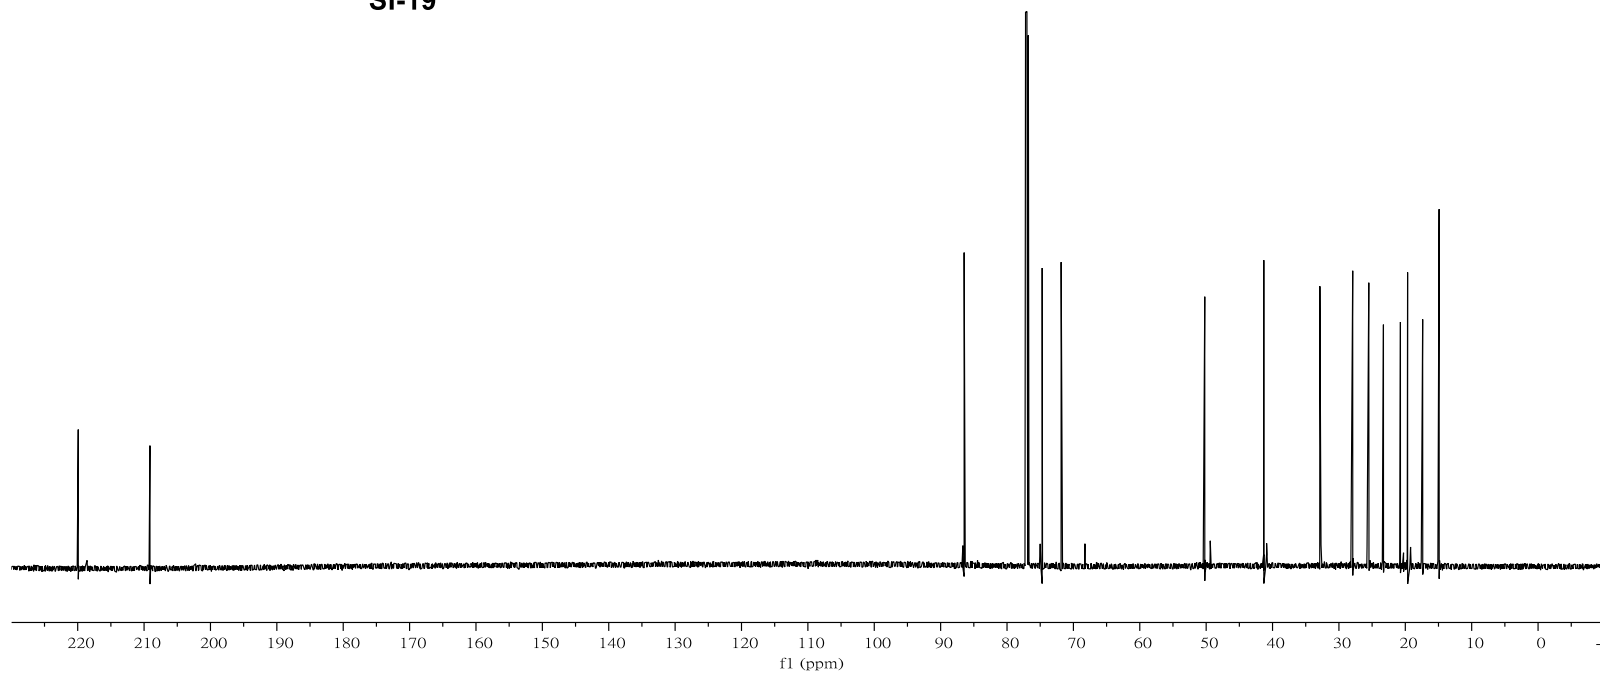

SI-145

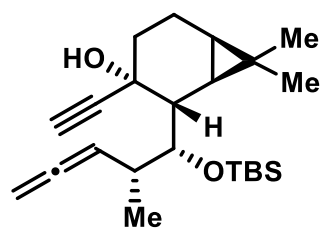

SI-19a

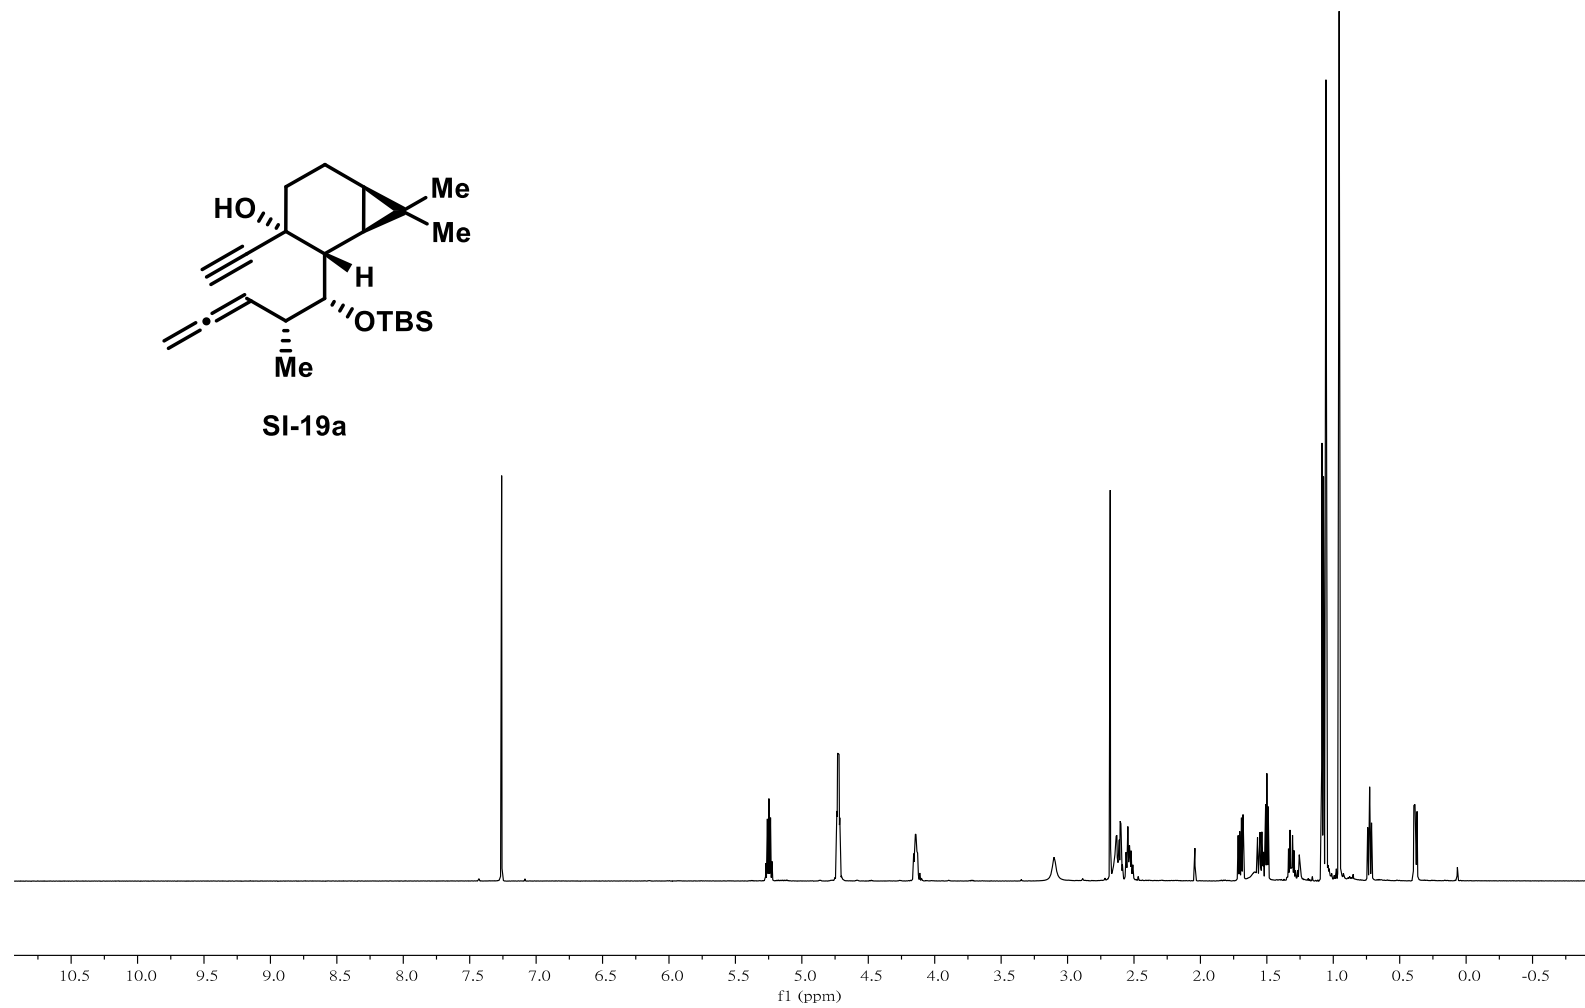

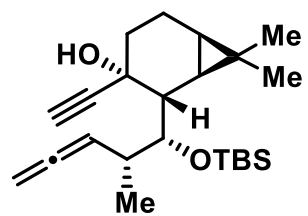

SI-19a

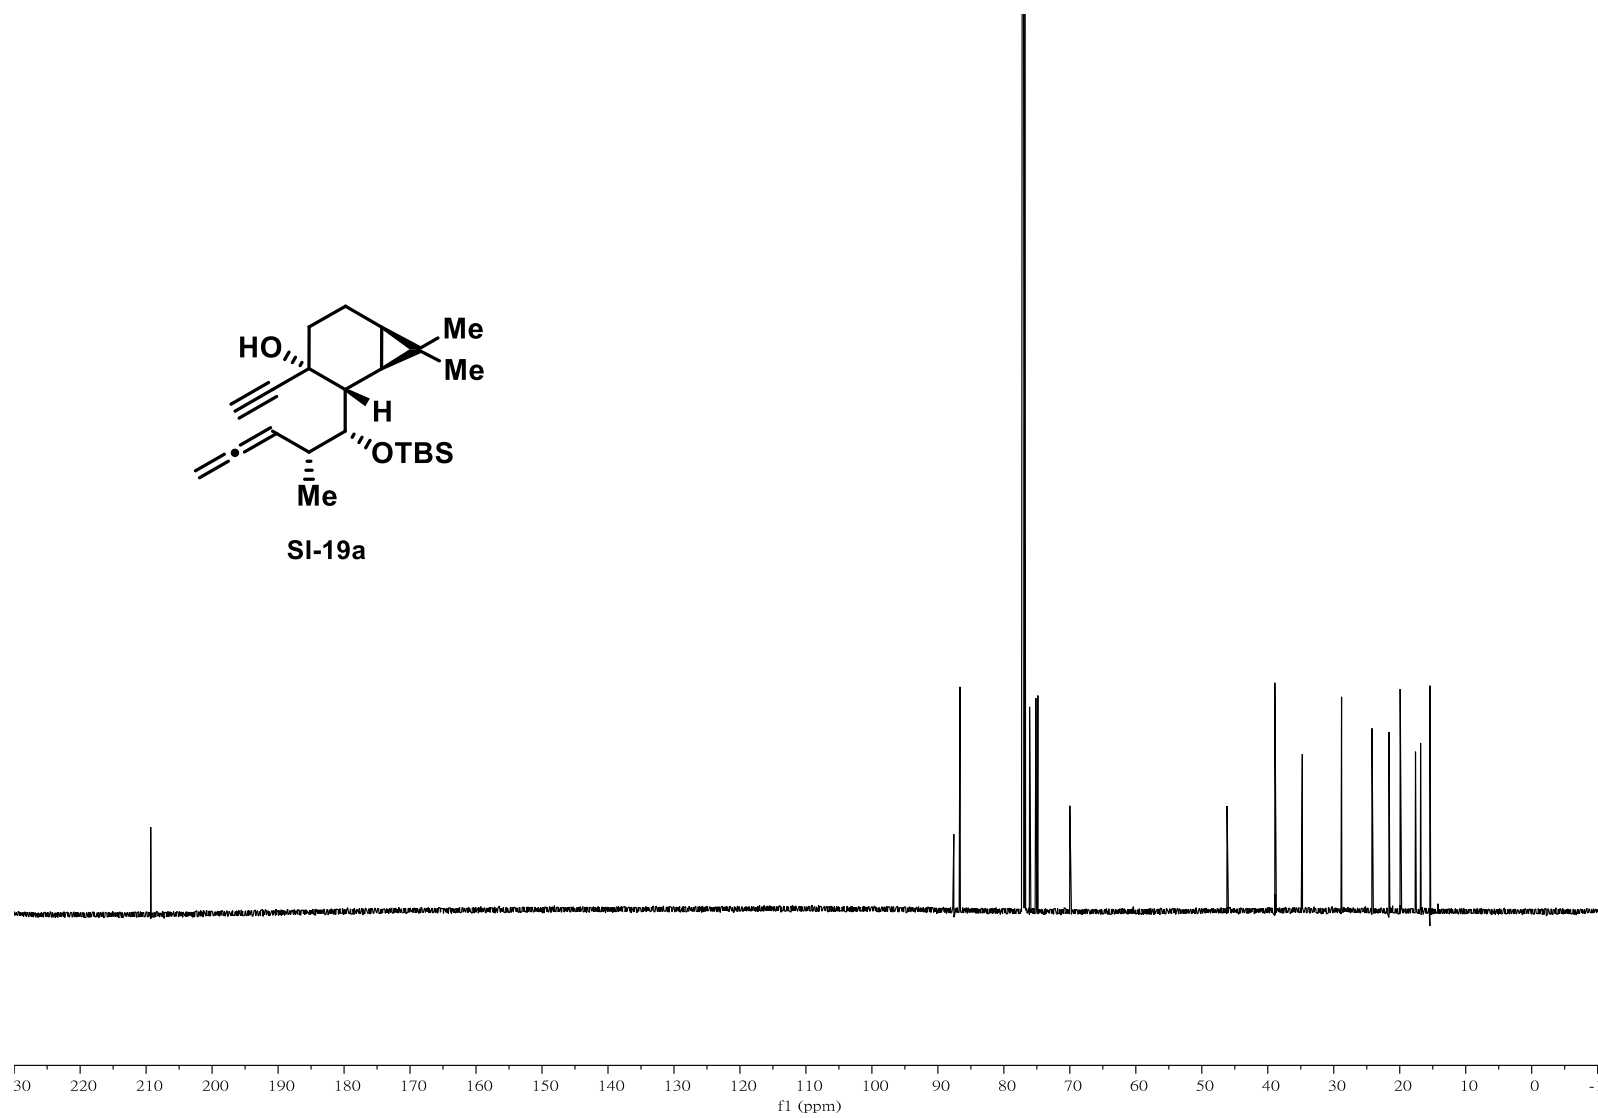

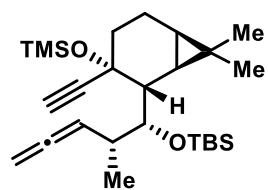

SI-20

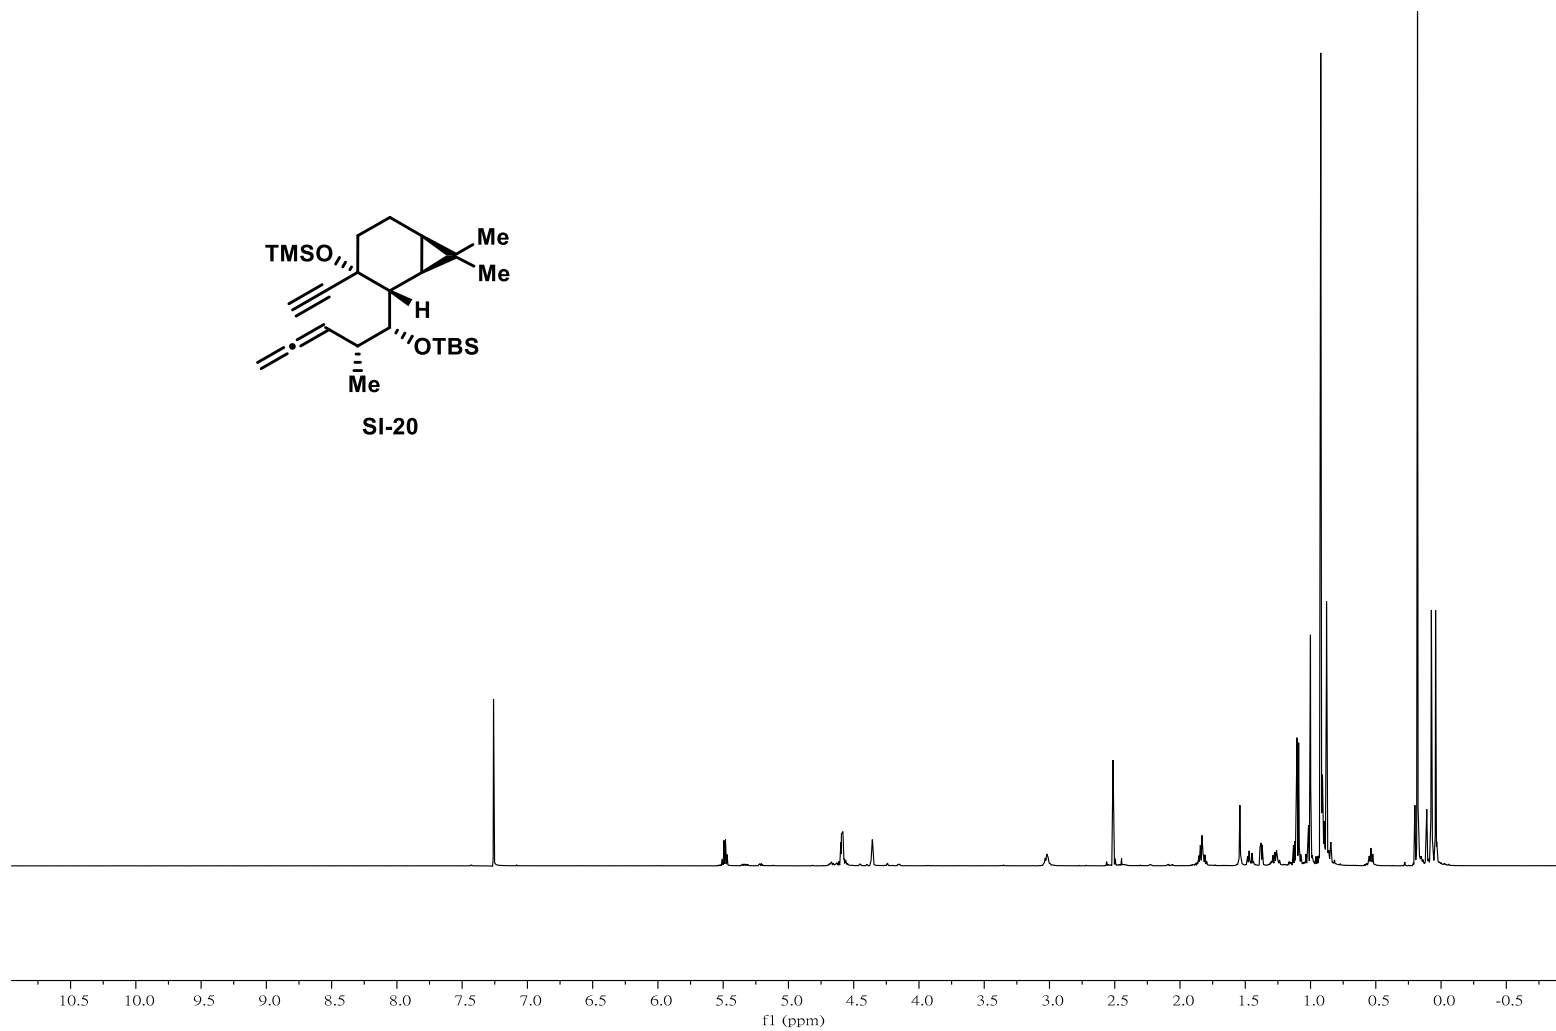

SI-148

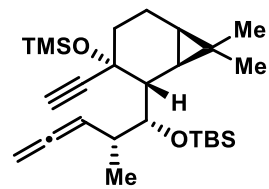

SI-20

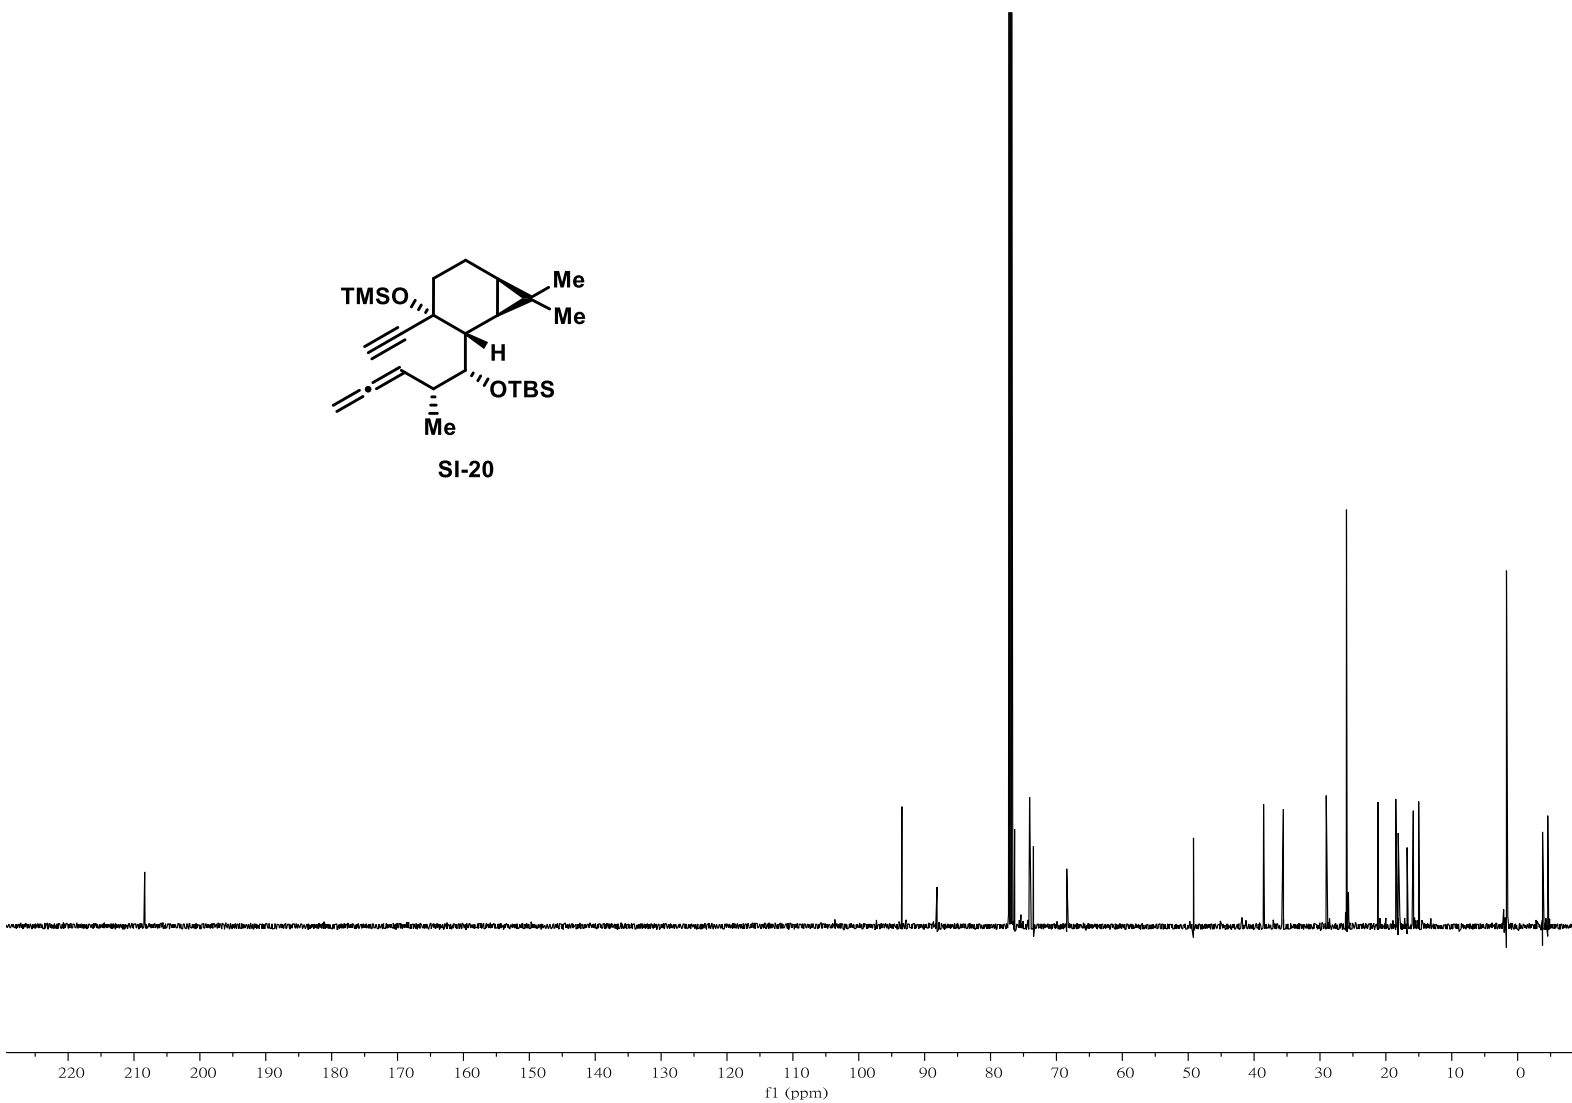

SI-149

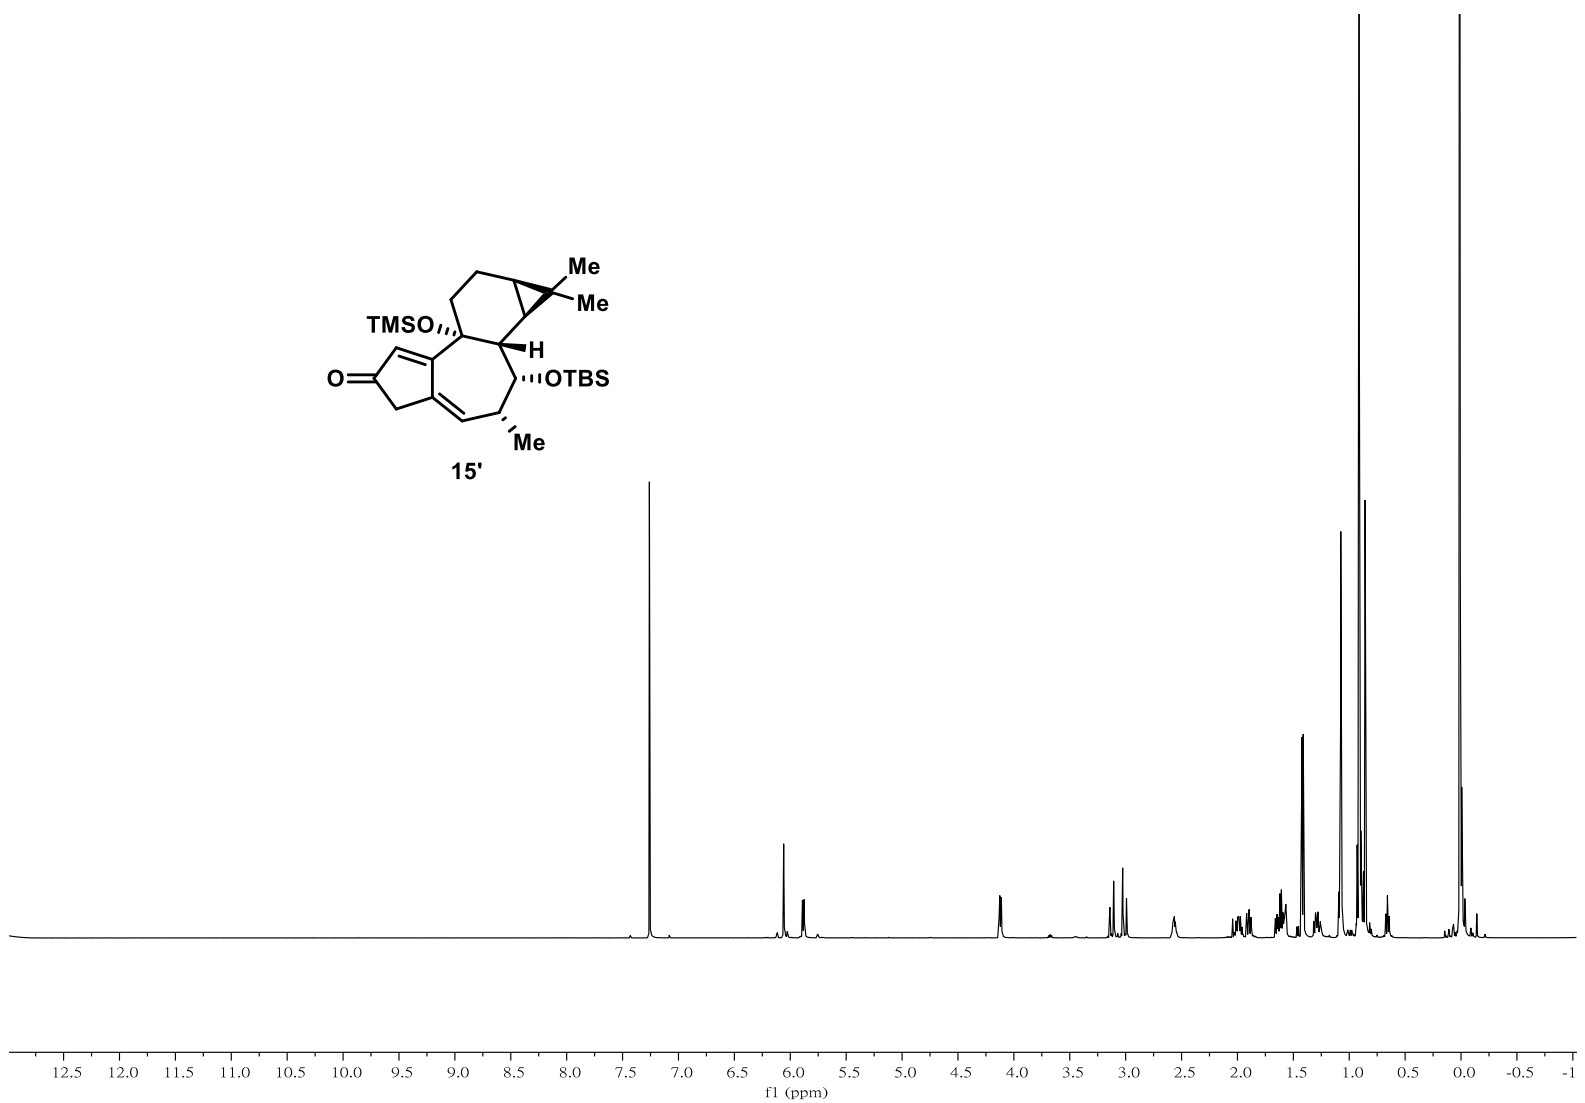

SI-150

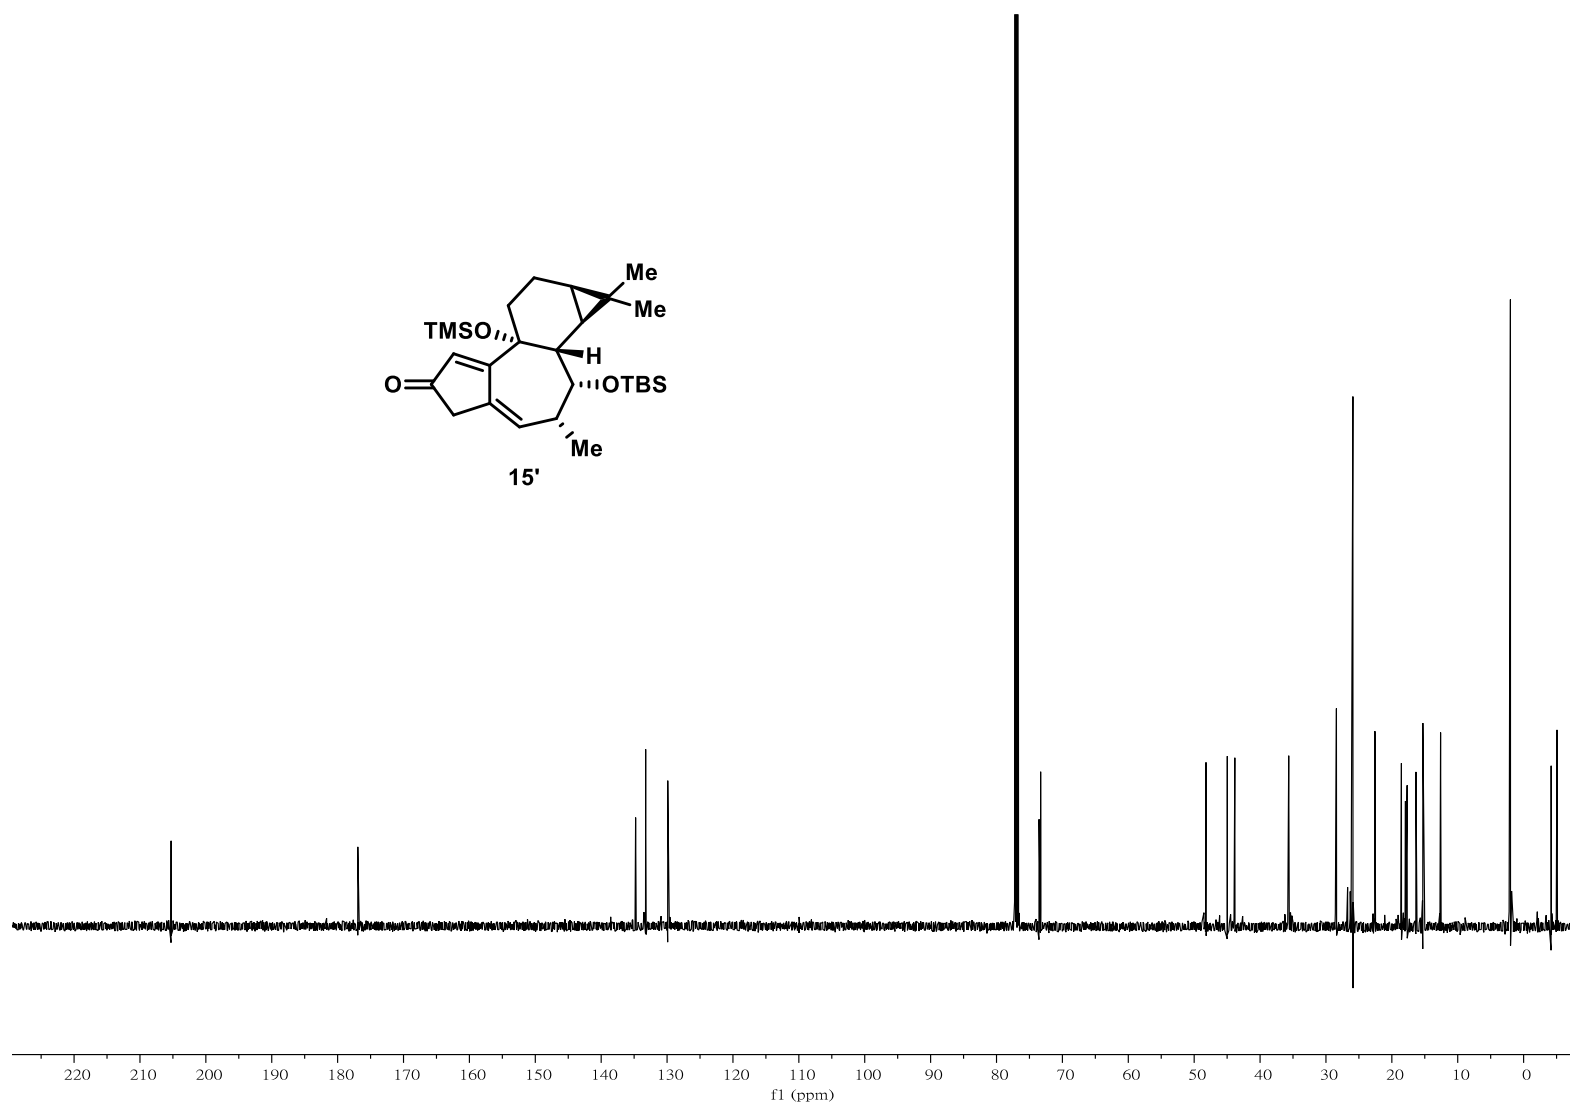

SI-151





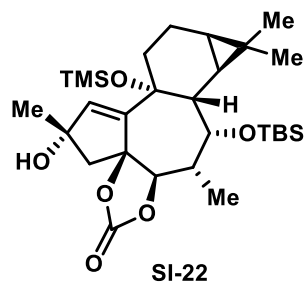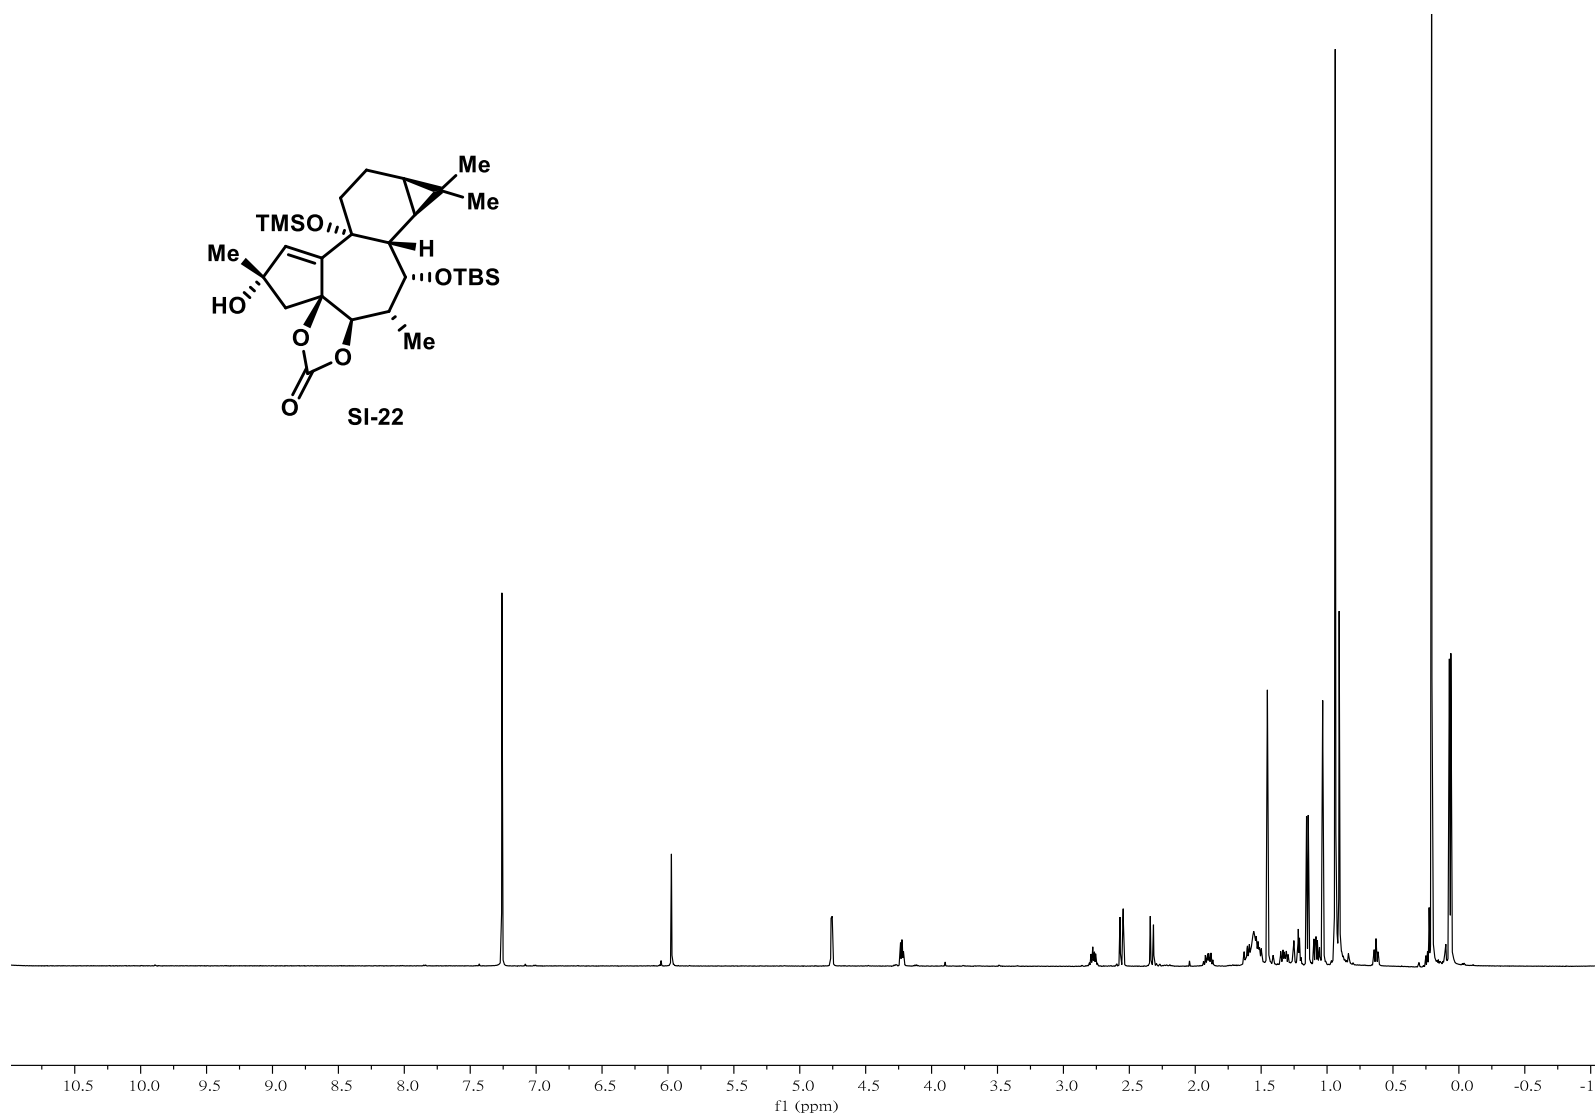

SI-154

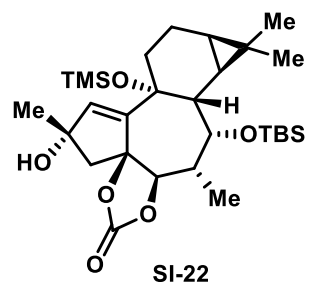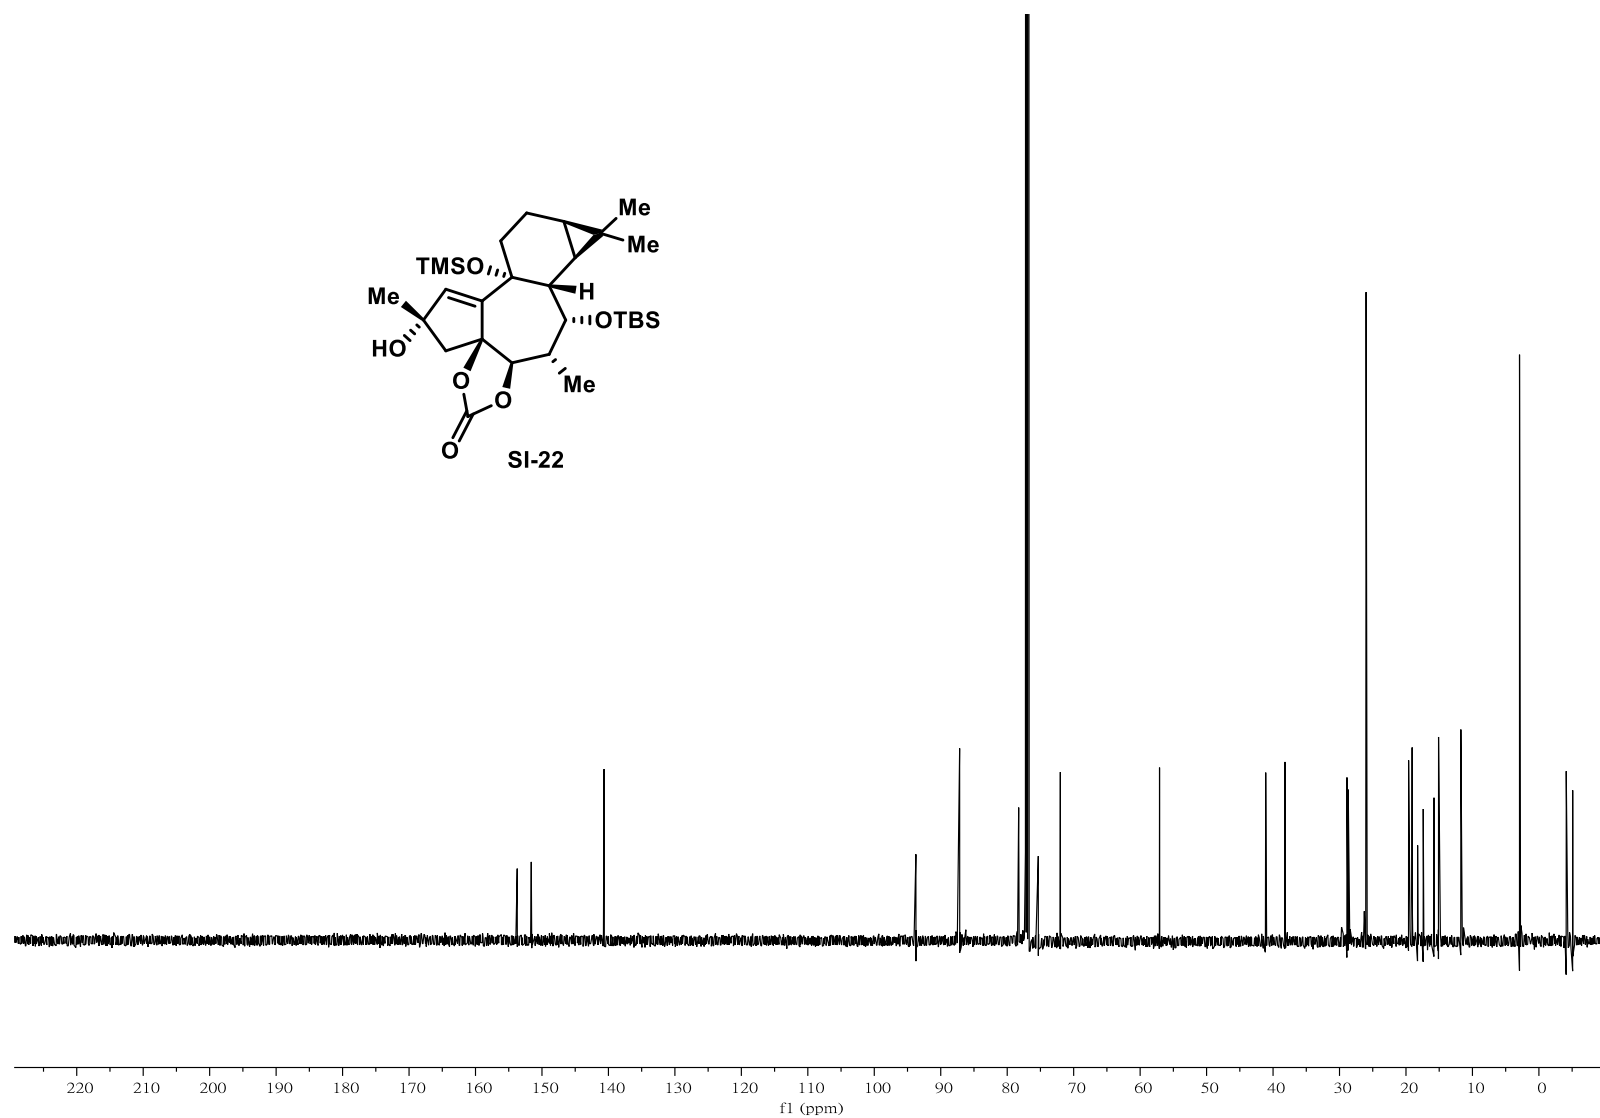

SI-155

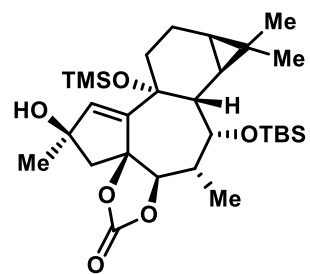

SI-22a

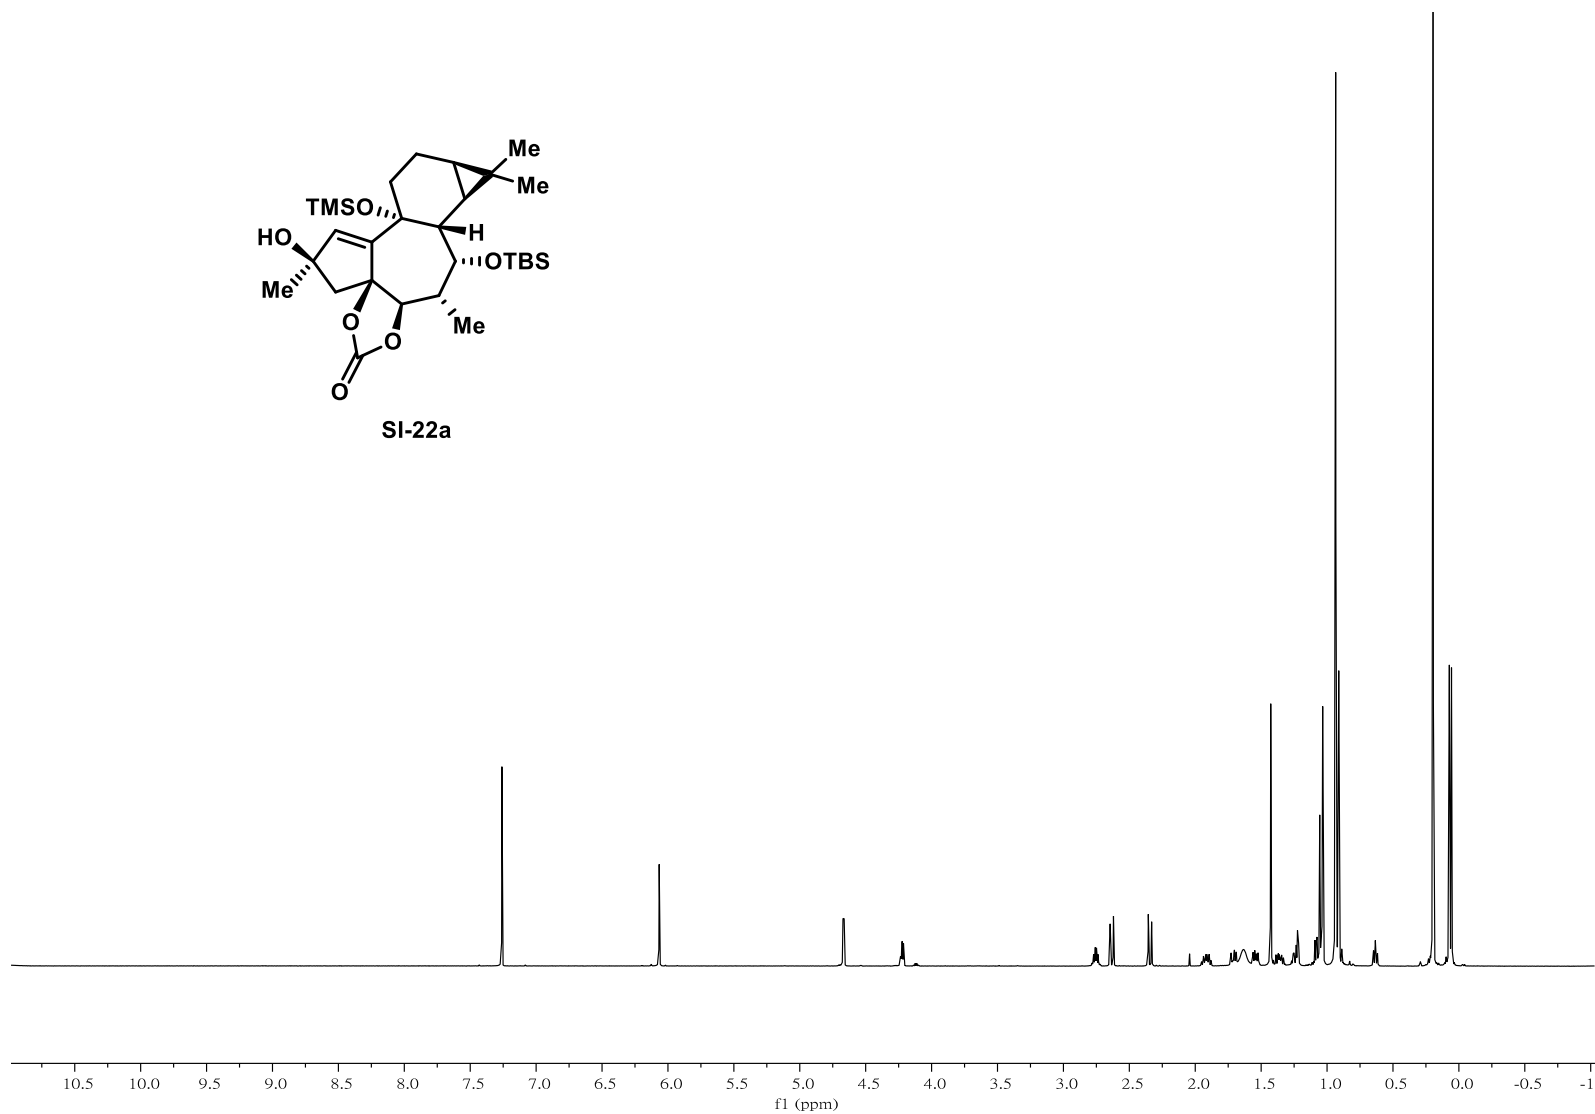

SI-156

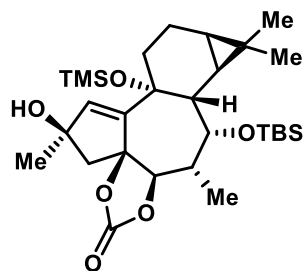

SI-22a

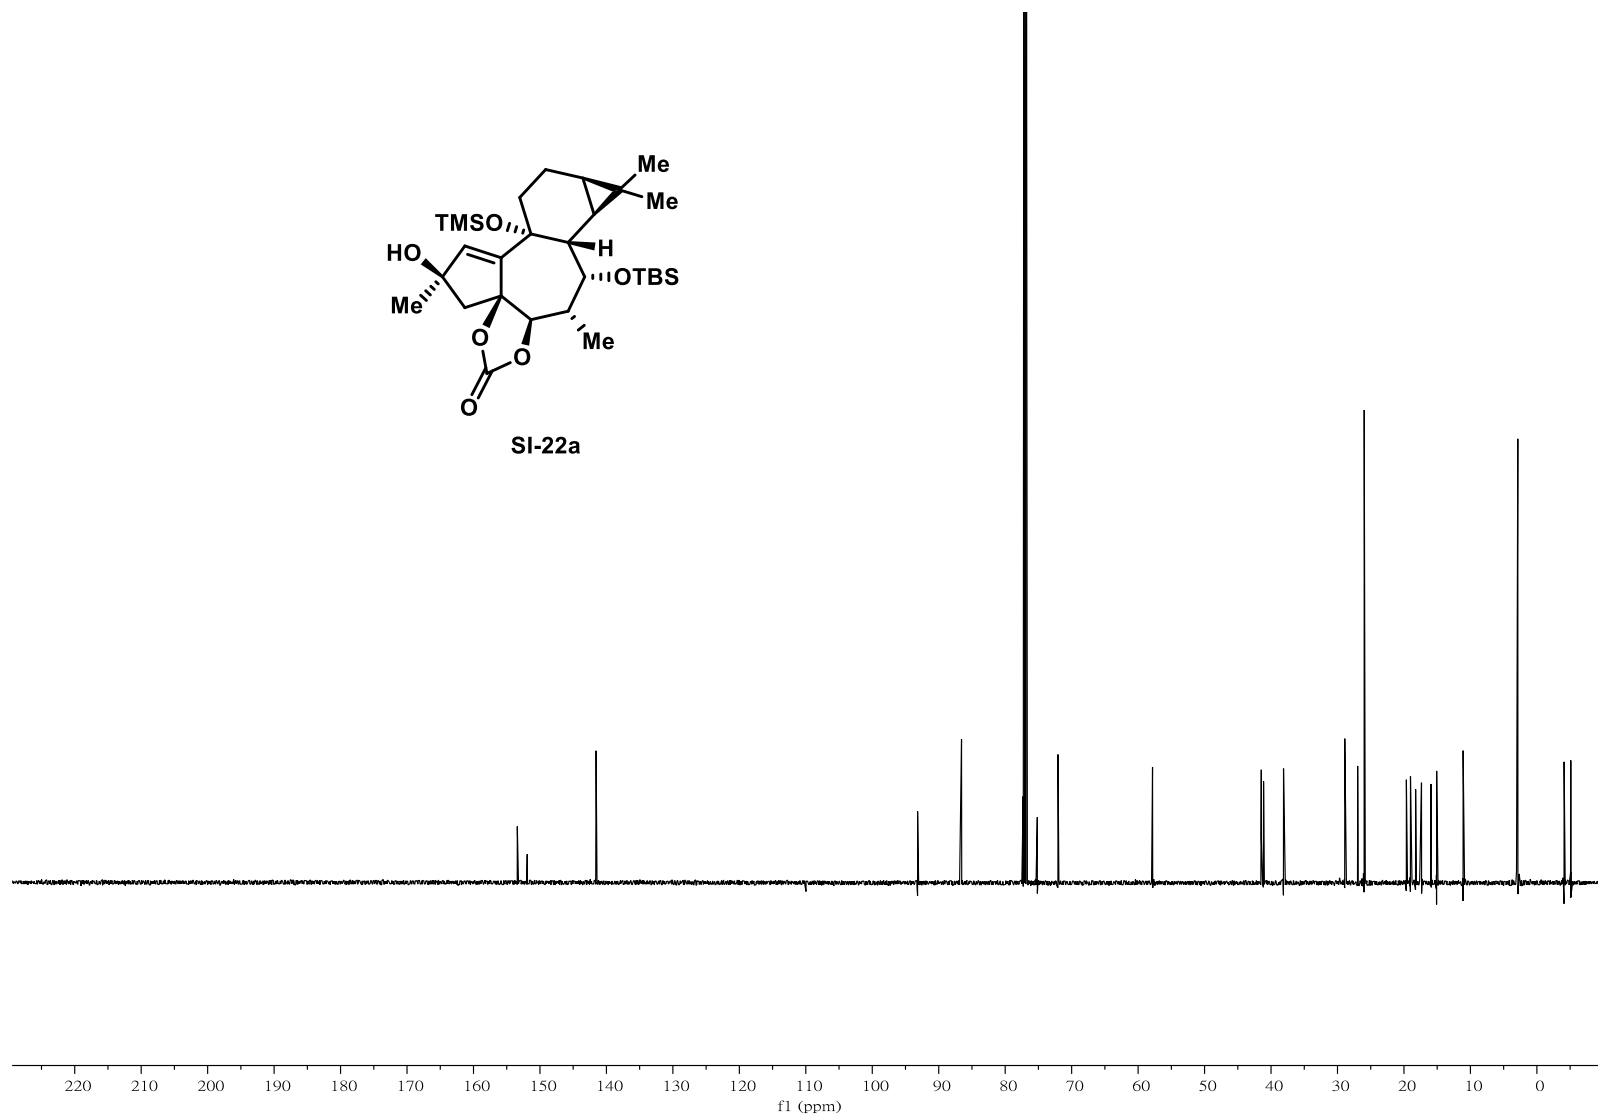

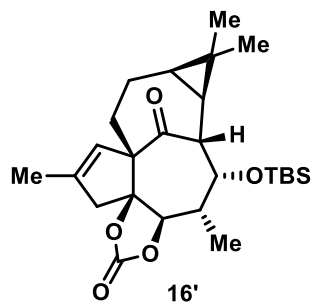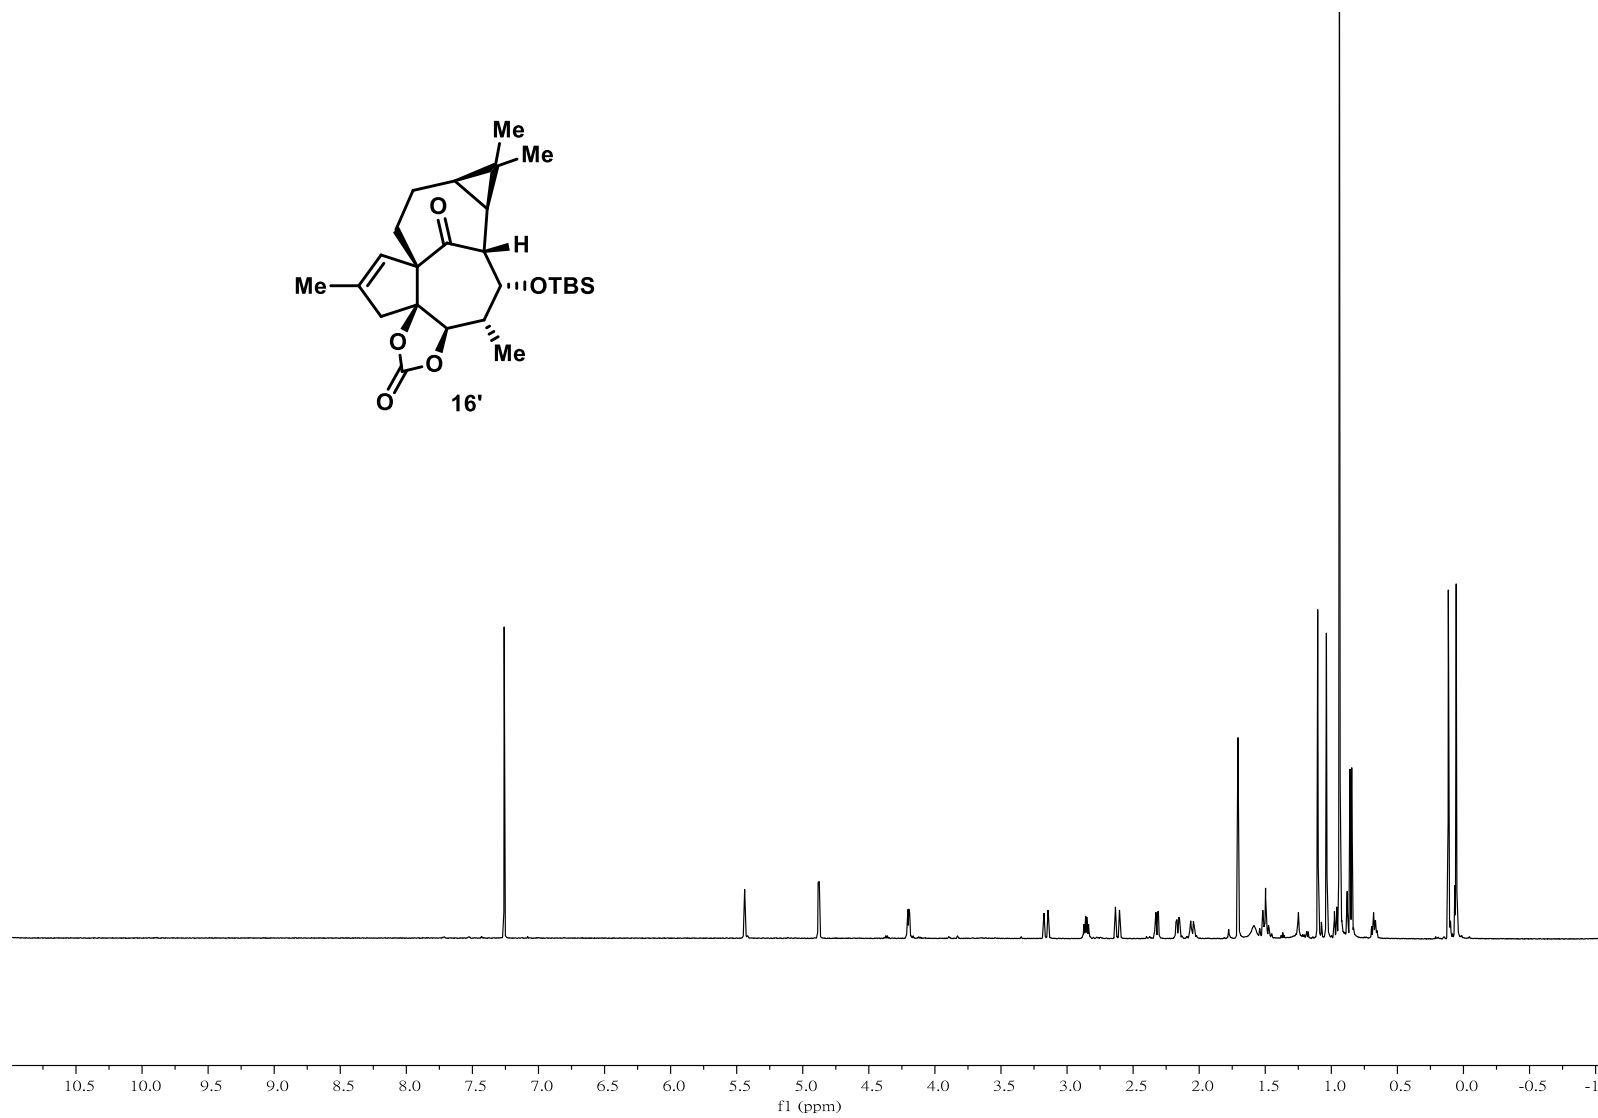

SI-158

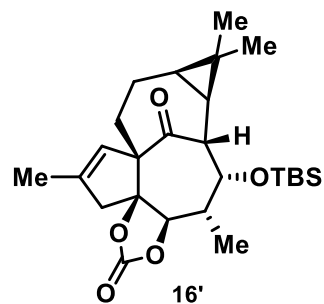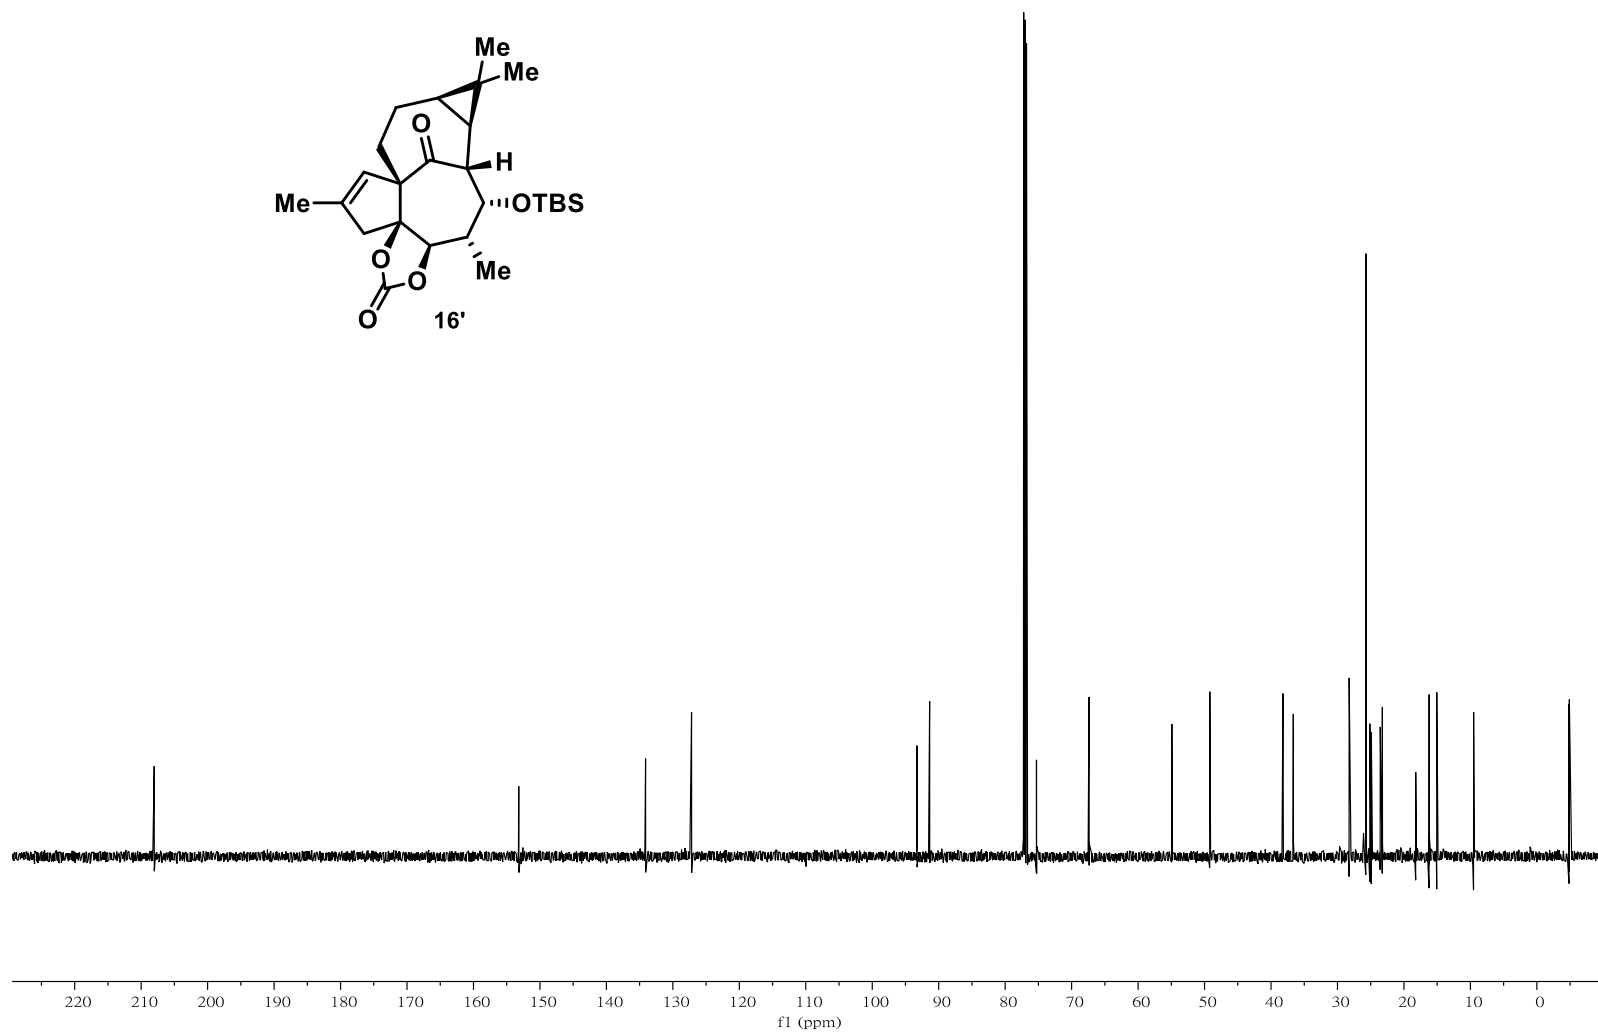

SI-159

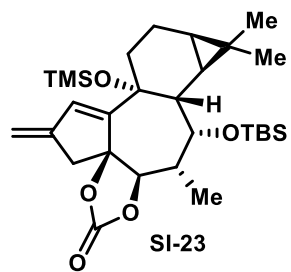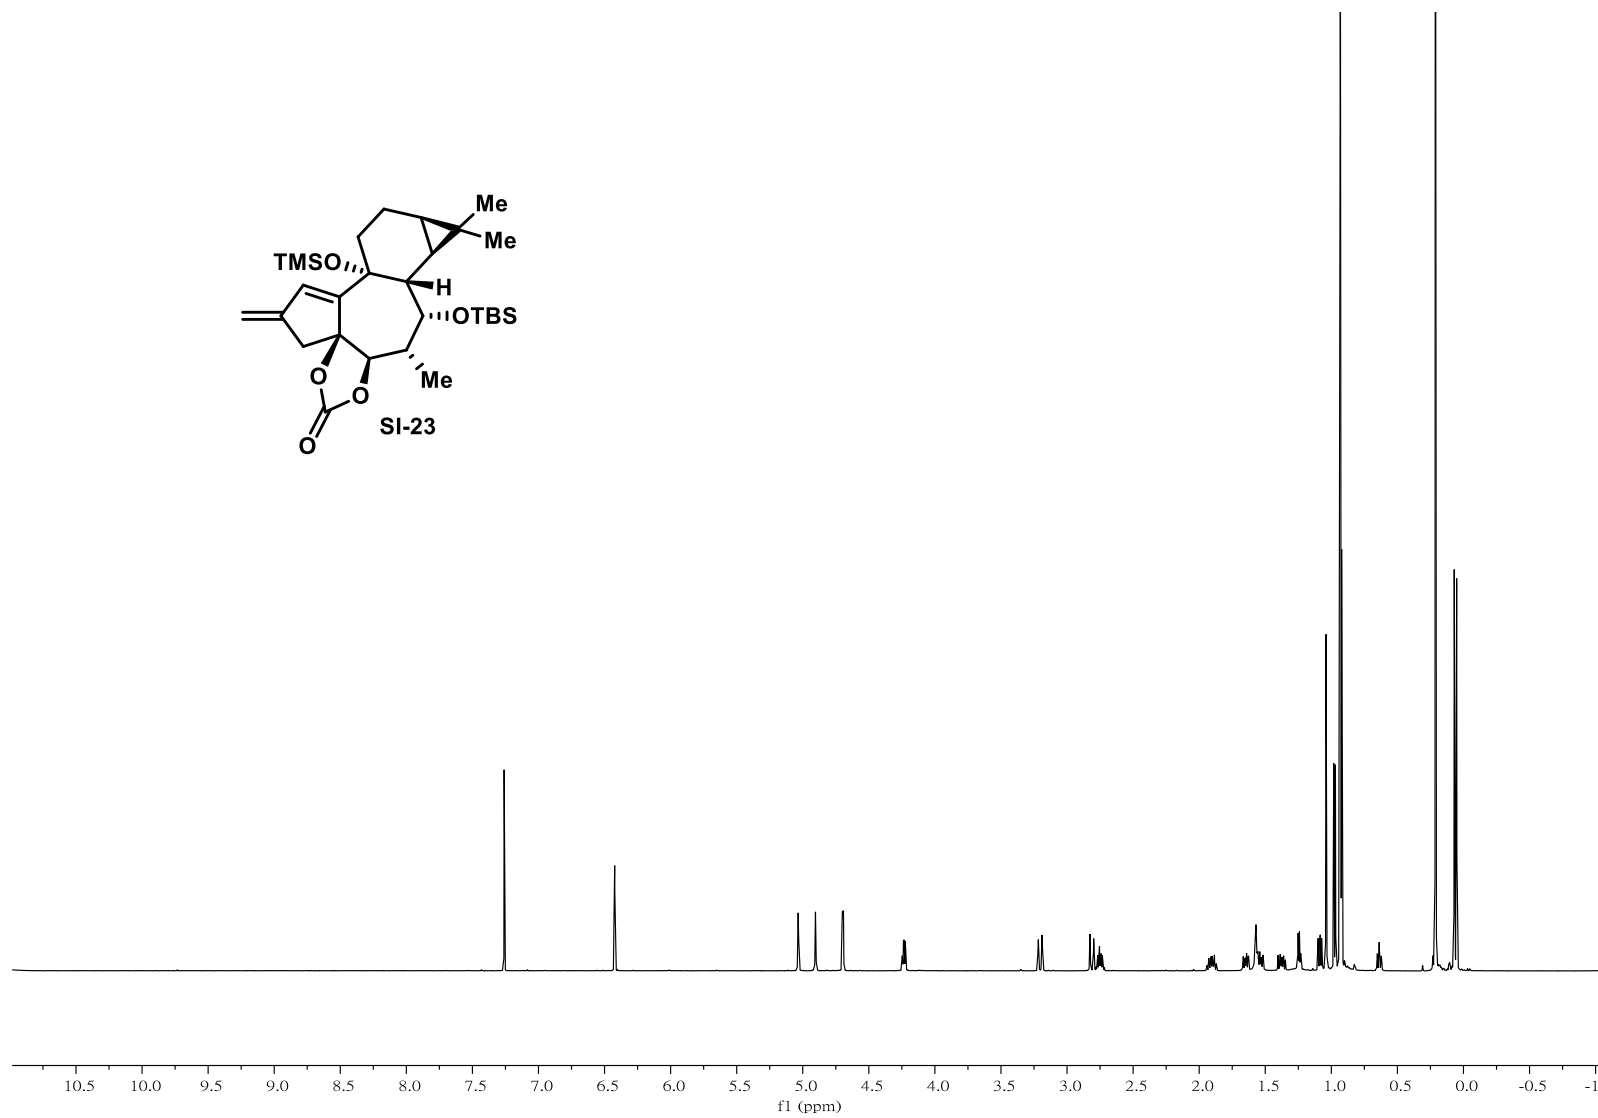

SI-160

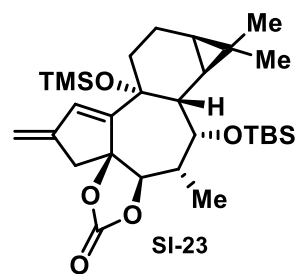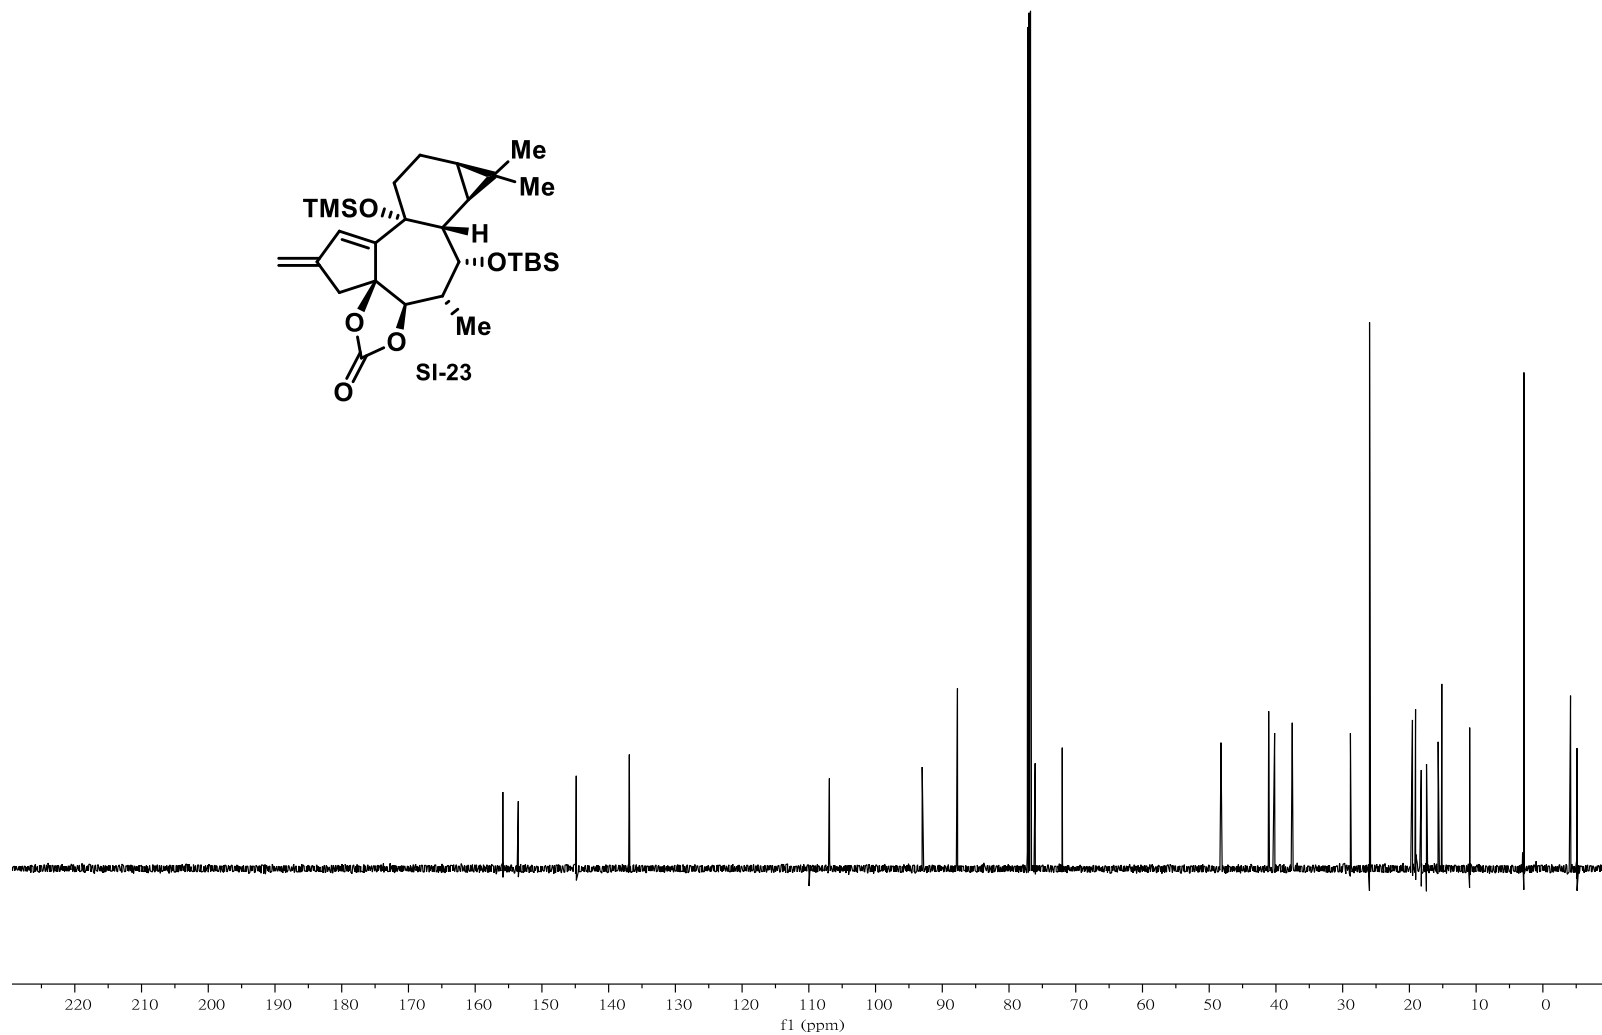

SI-161

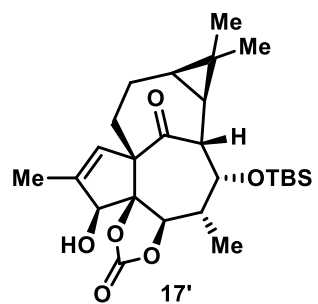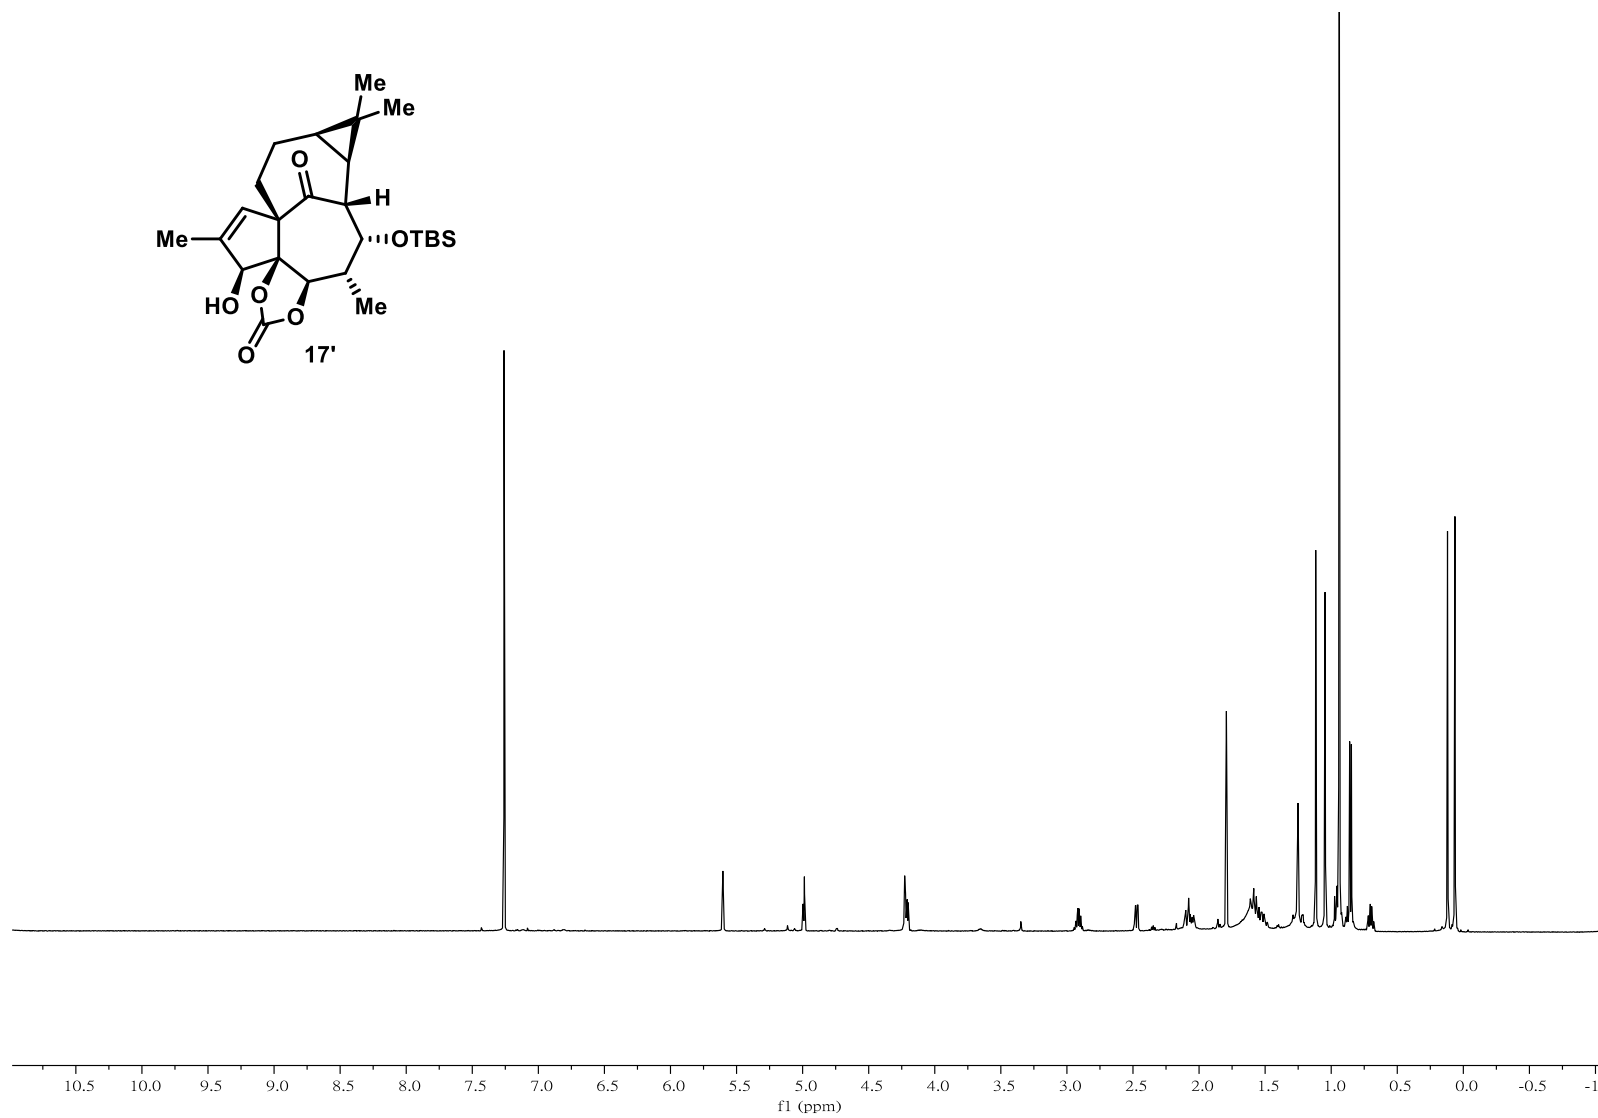

SI-162

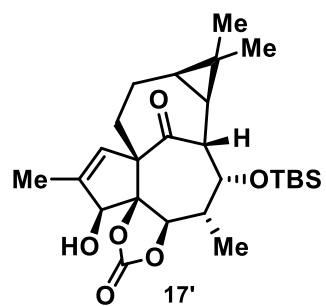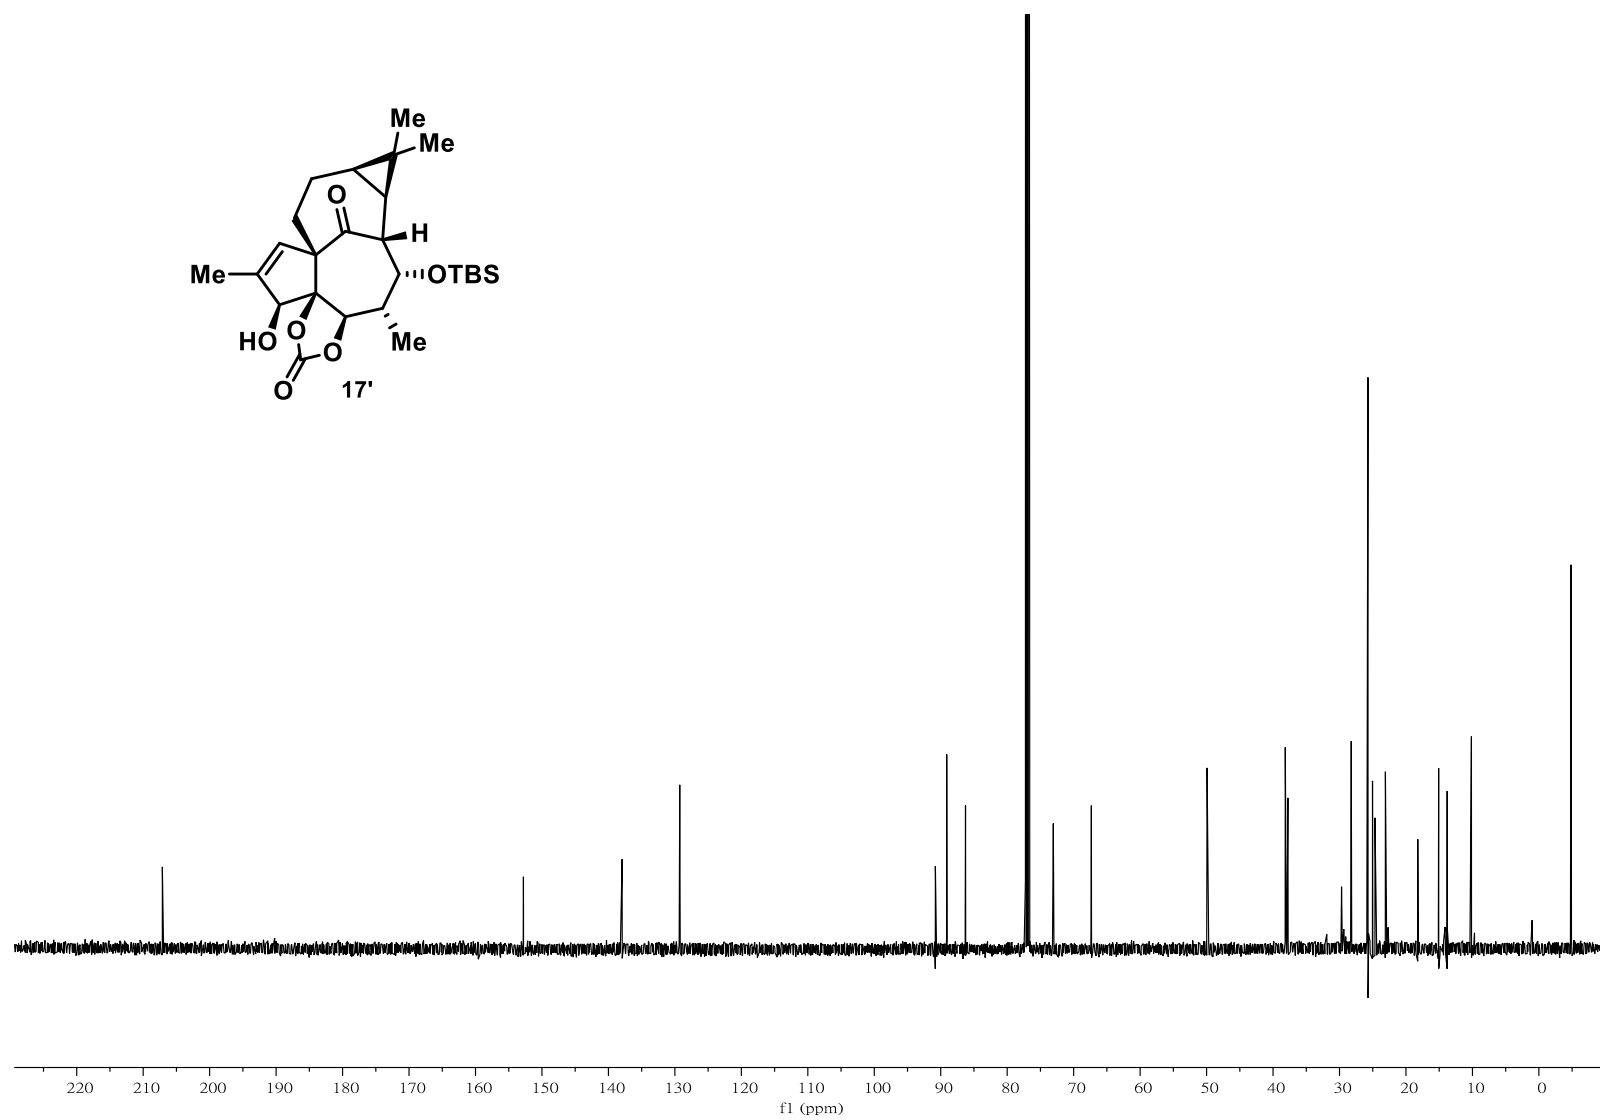

SI-163

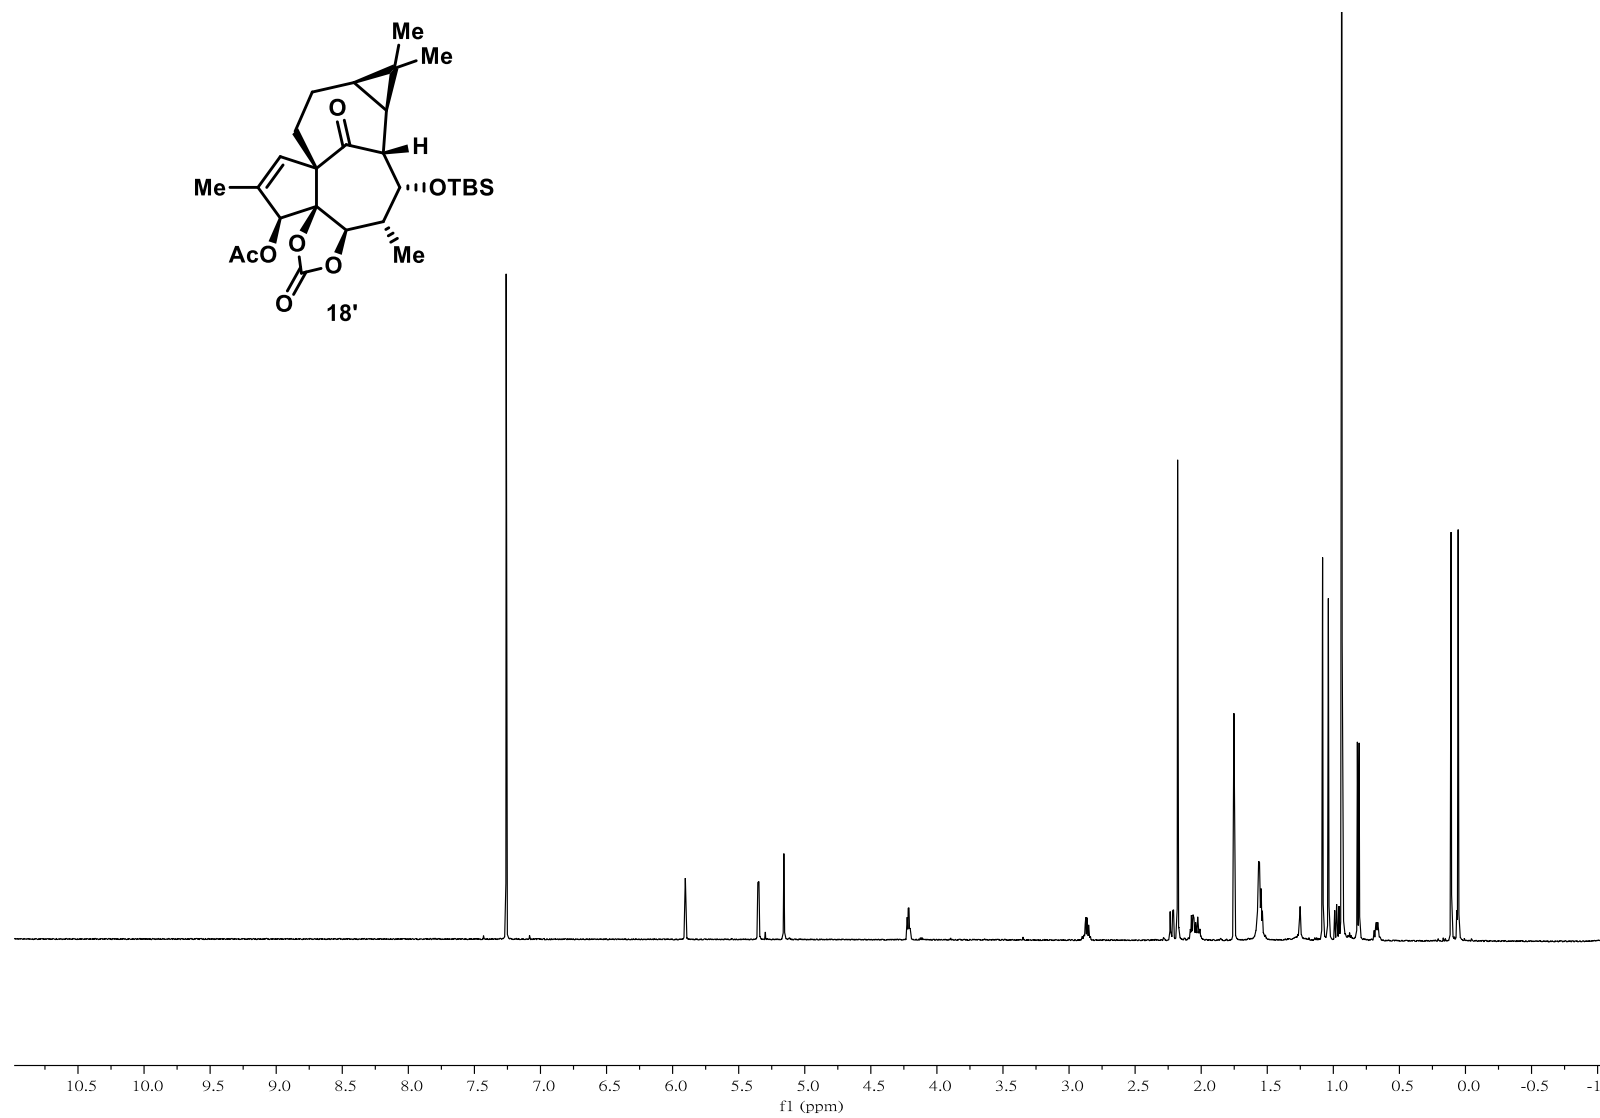

SI-164

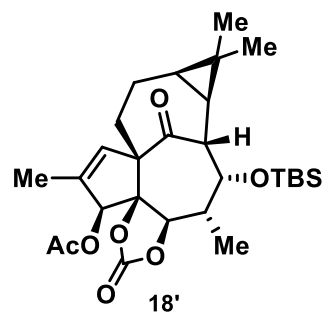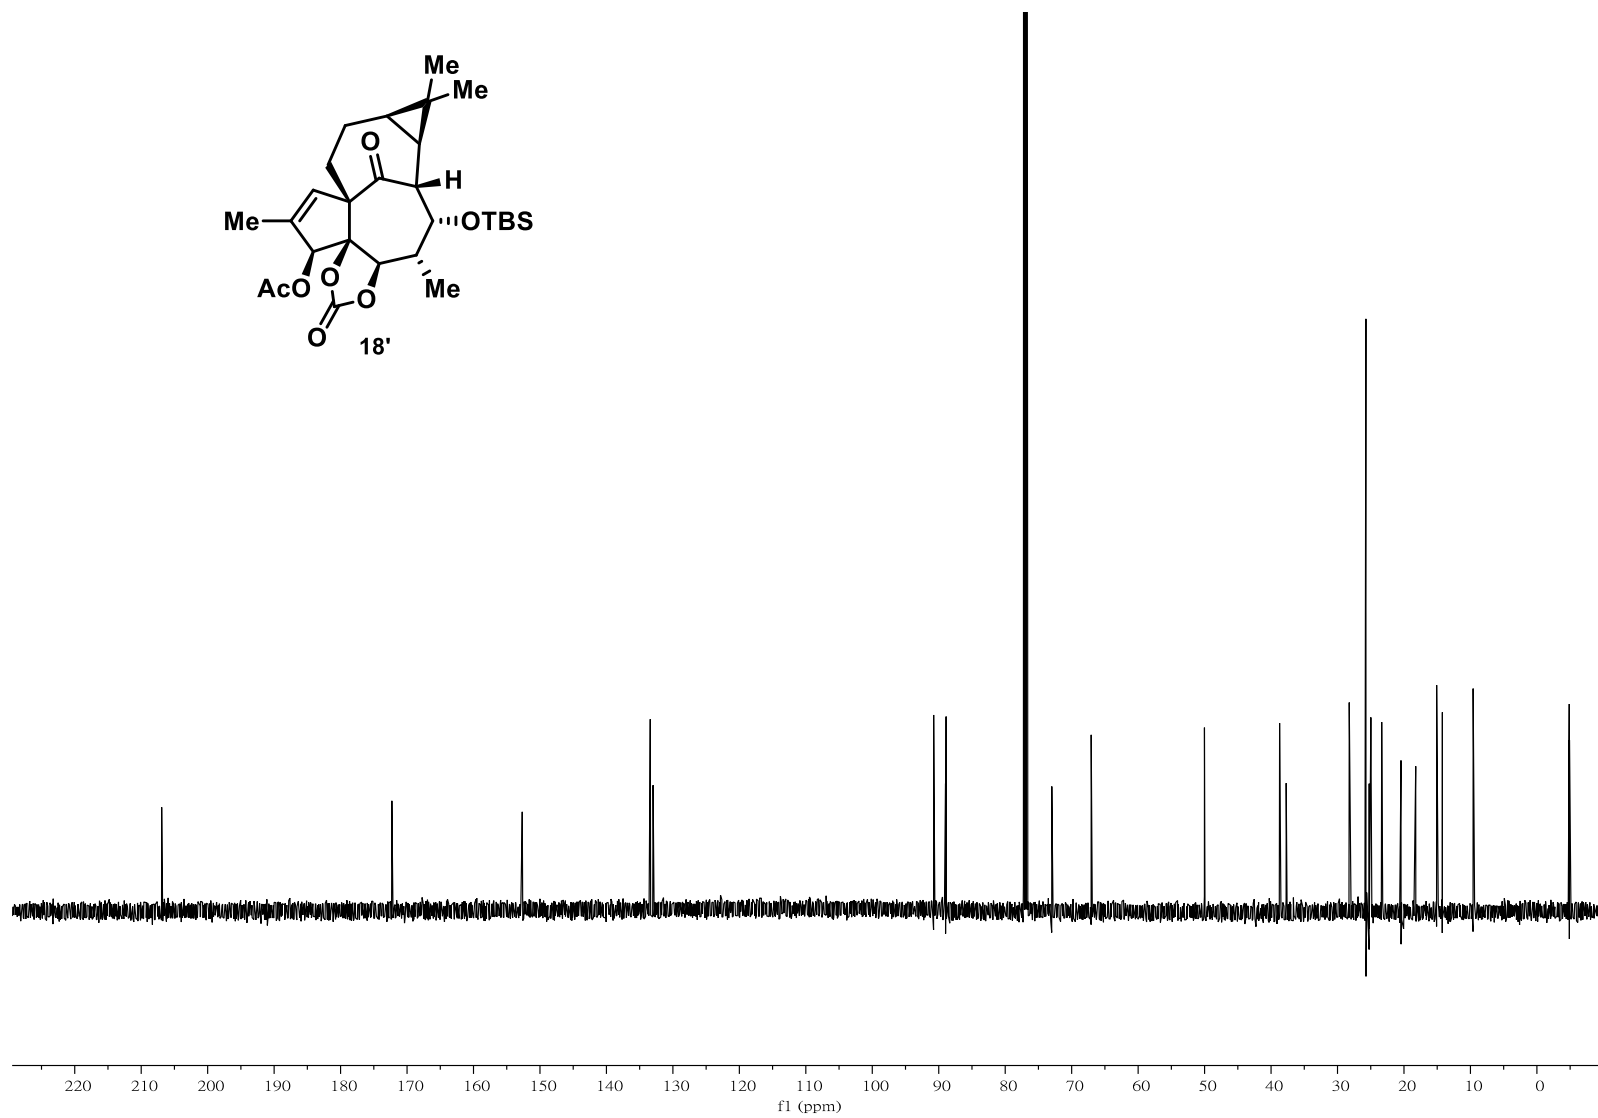

SI-165

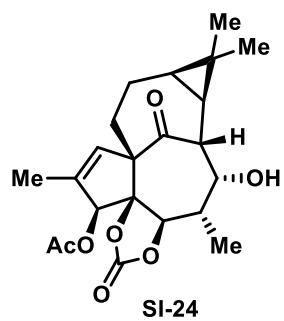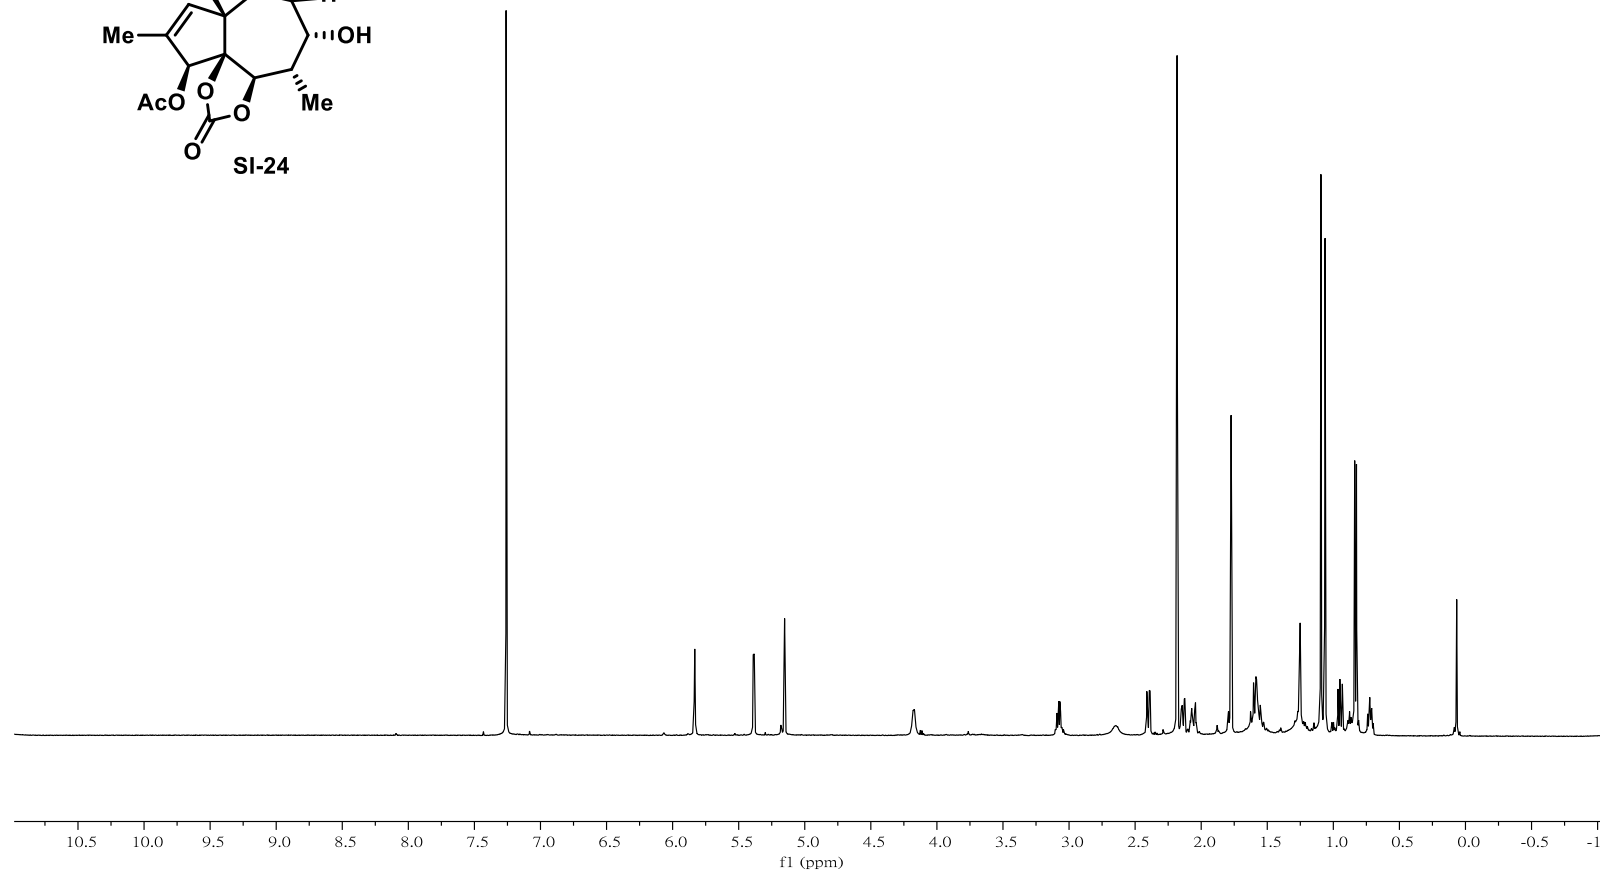

SI-166

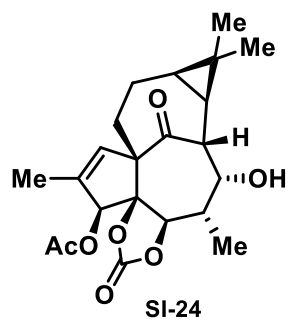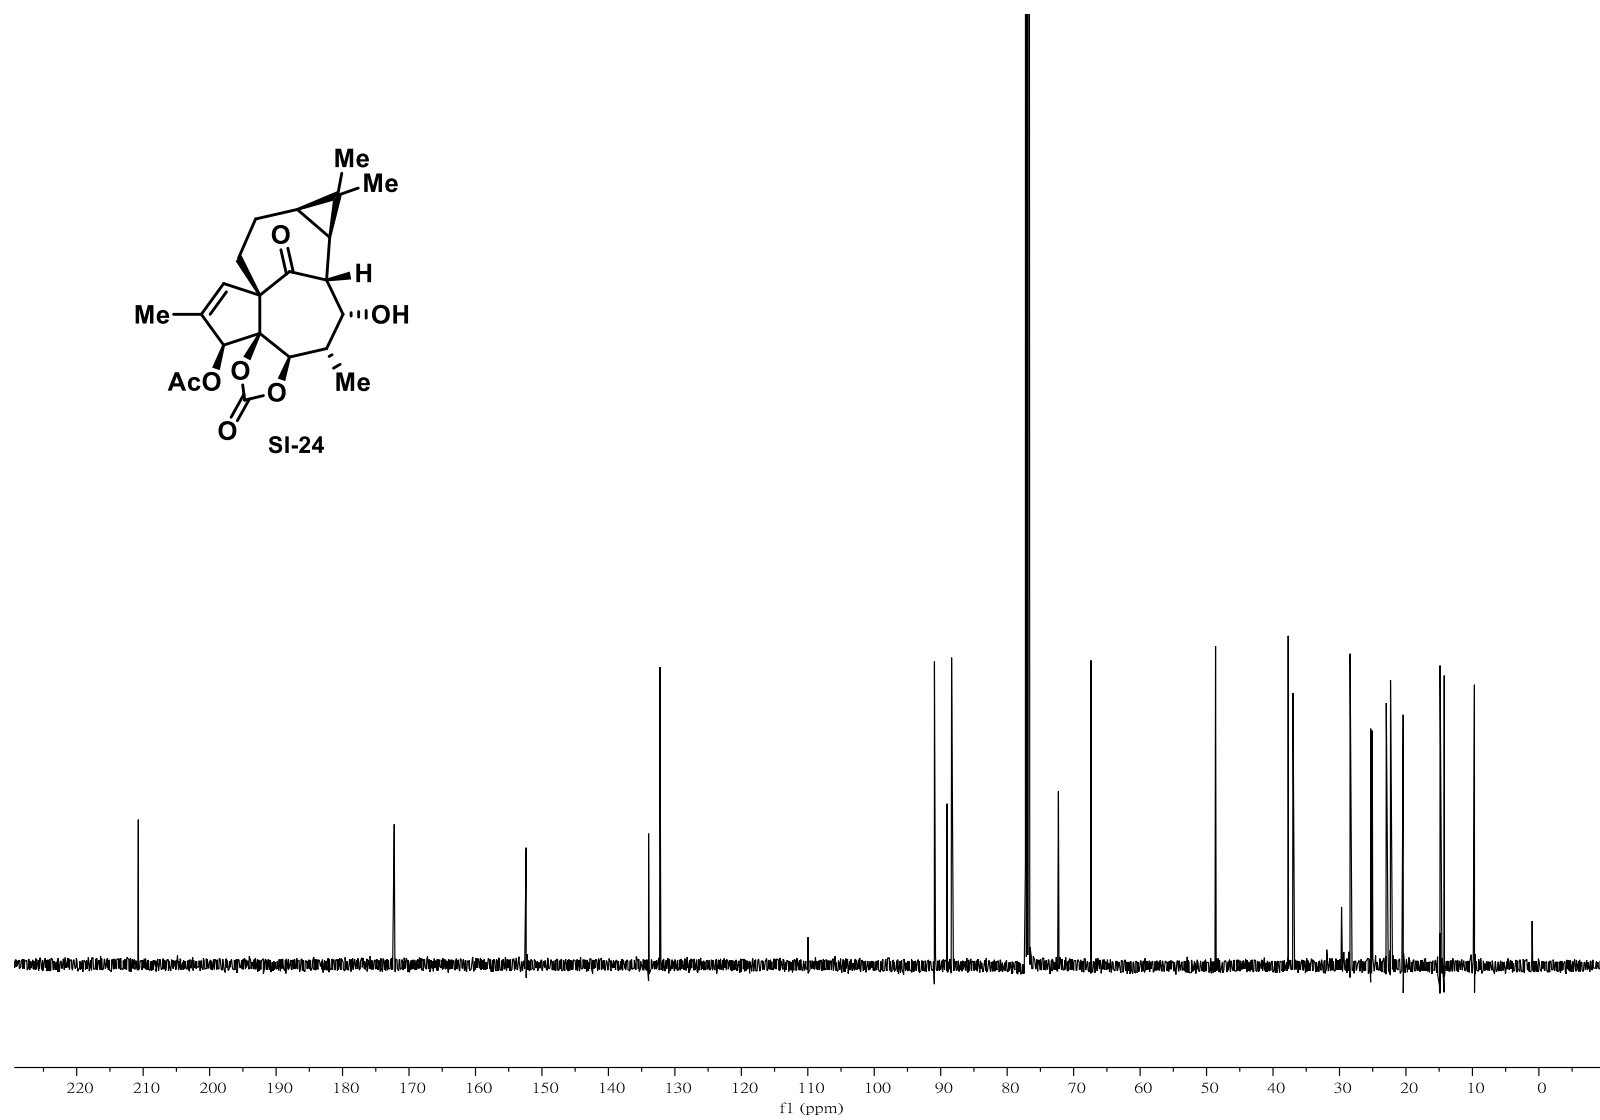

SI-167

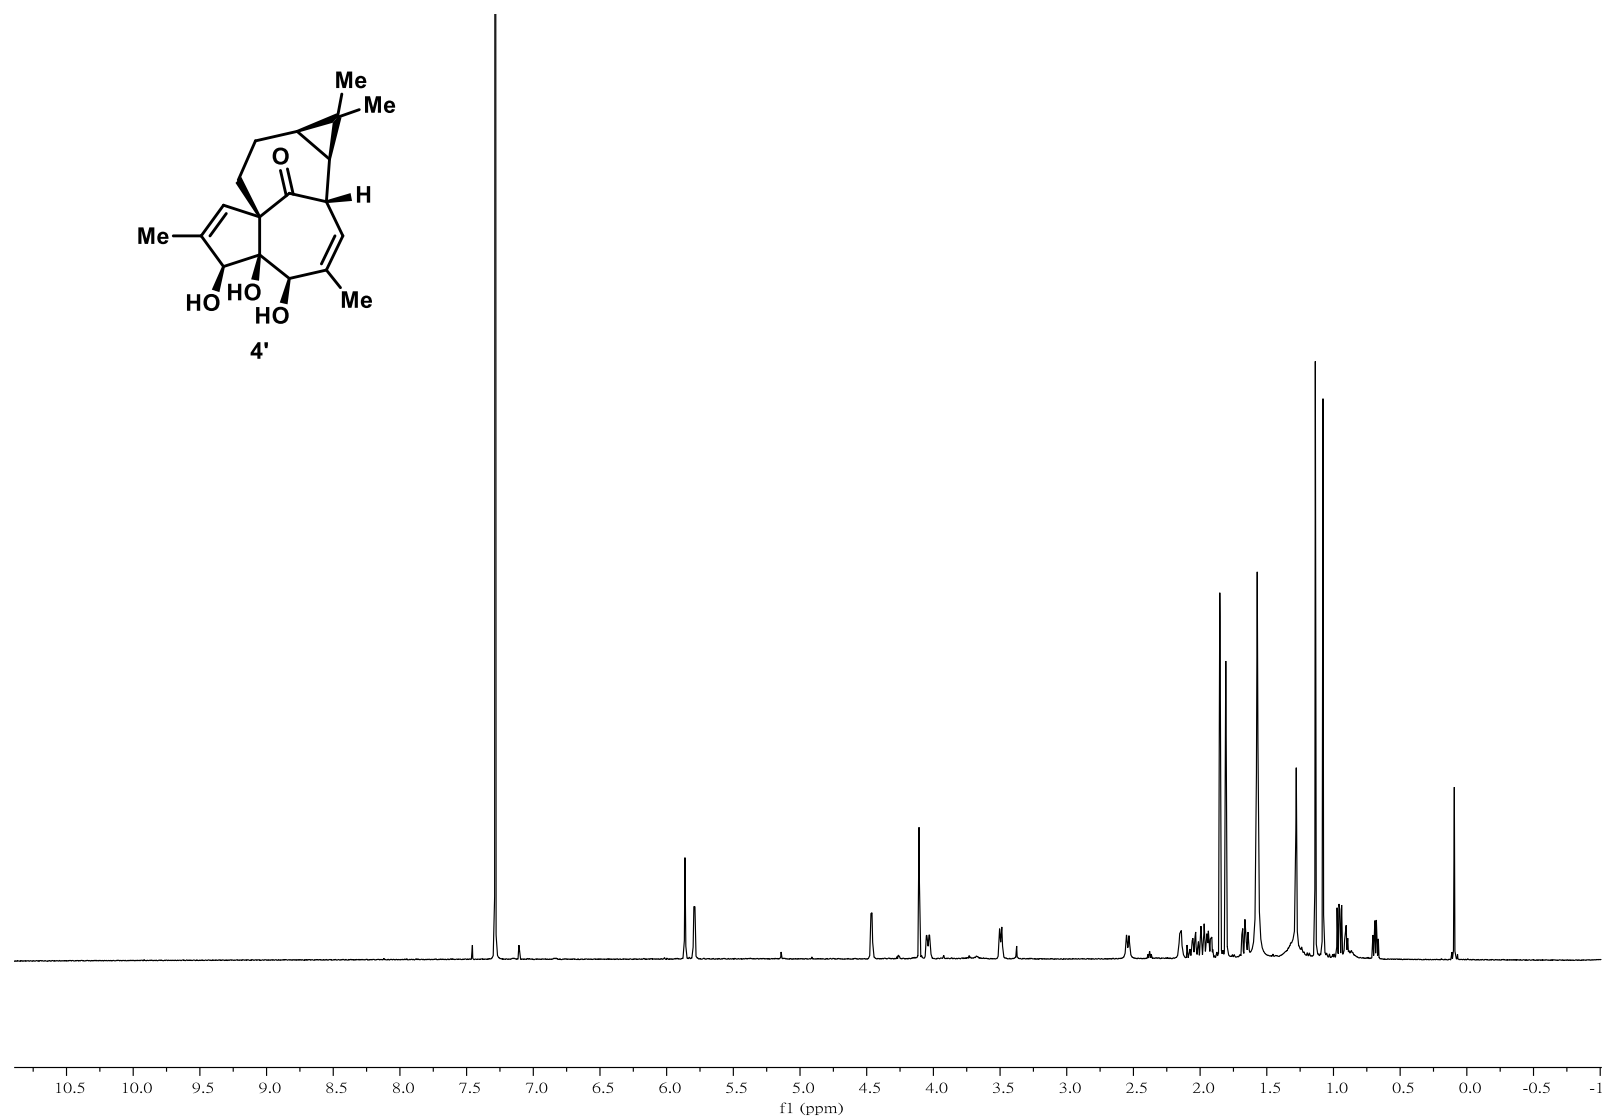

SI-168

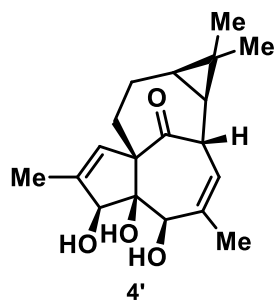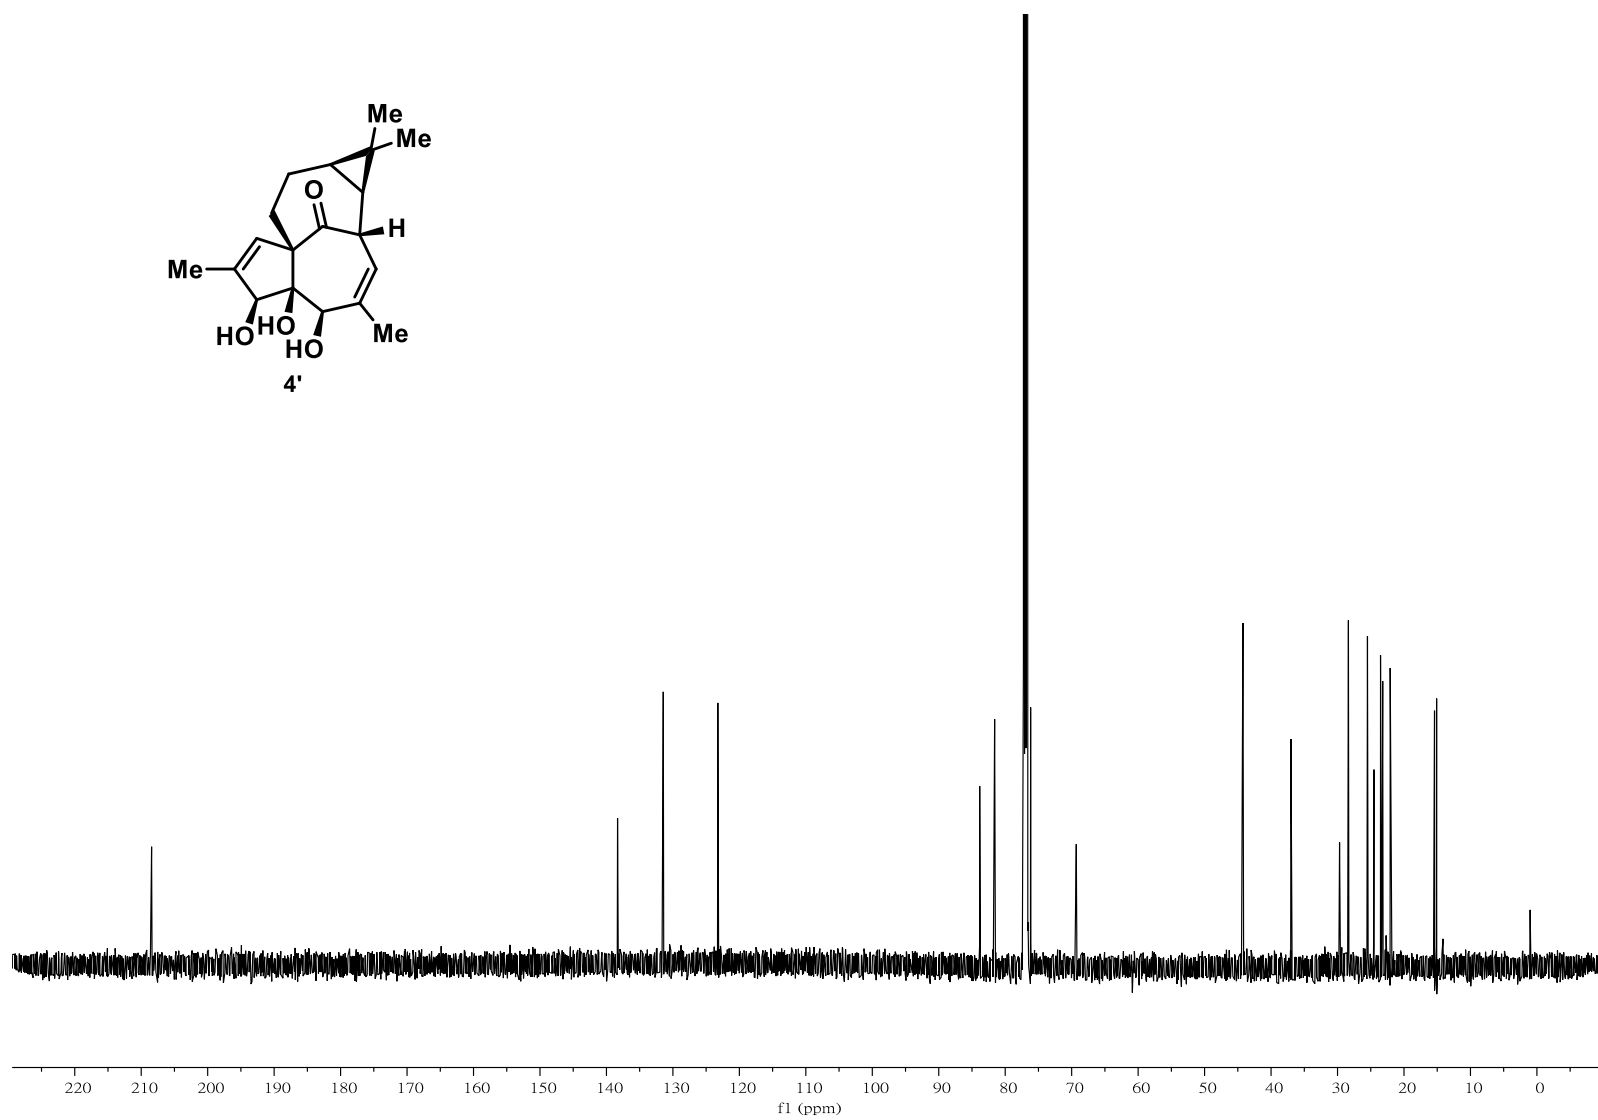

SI-169

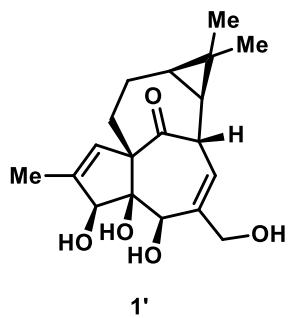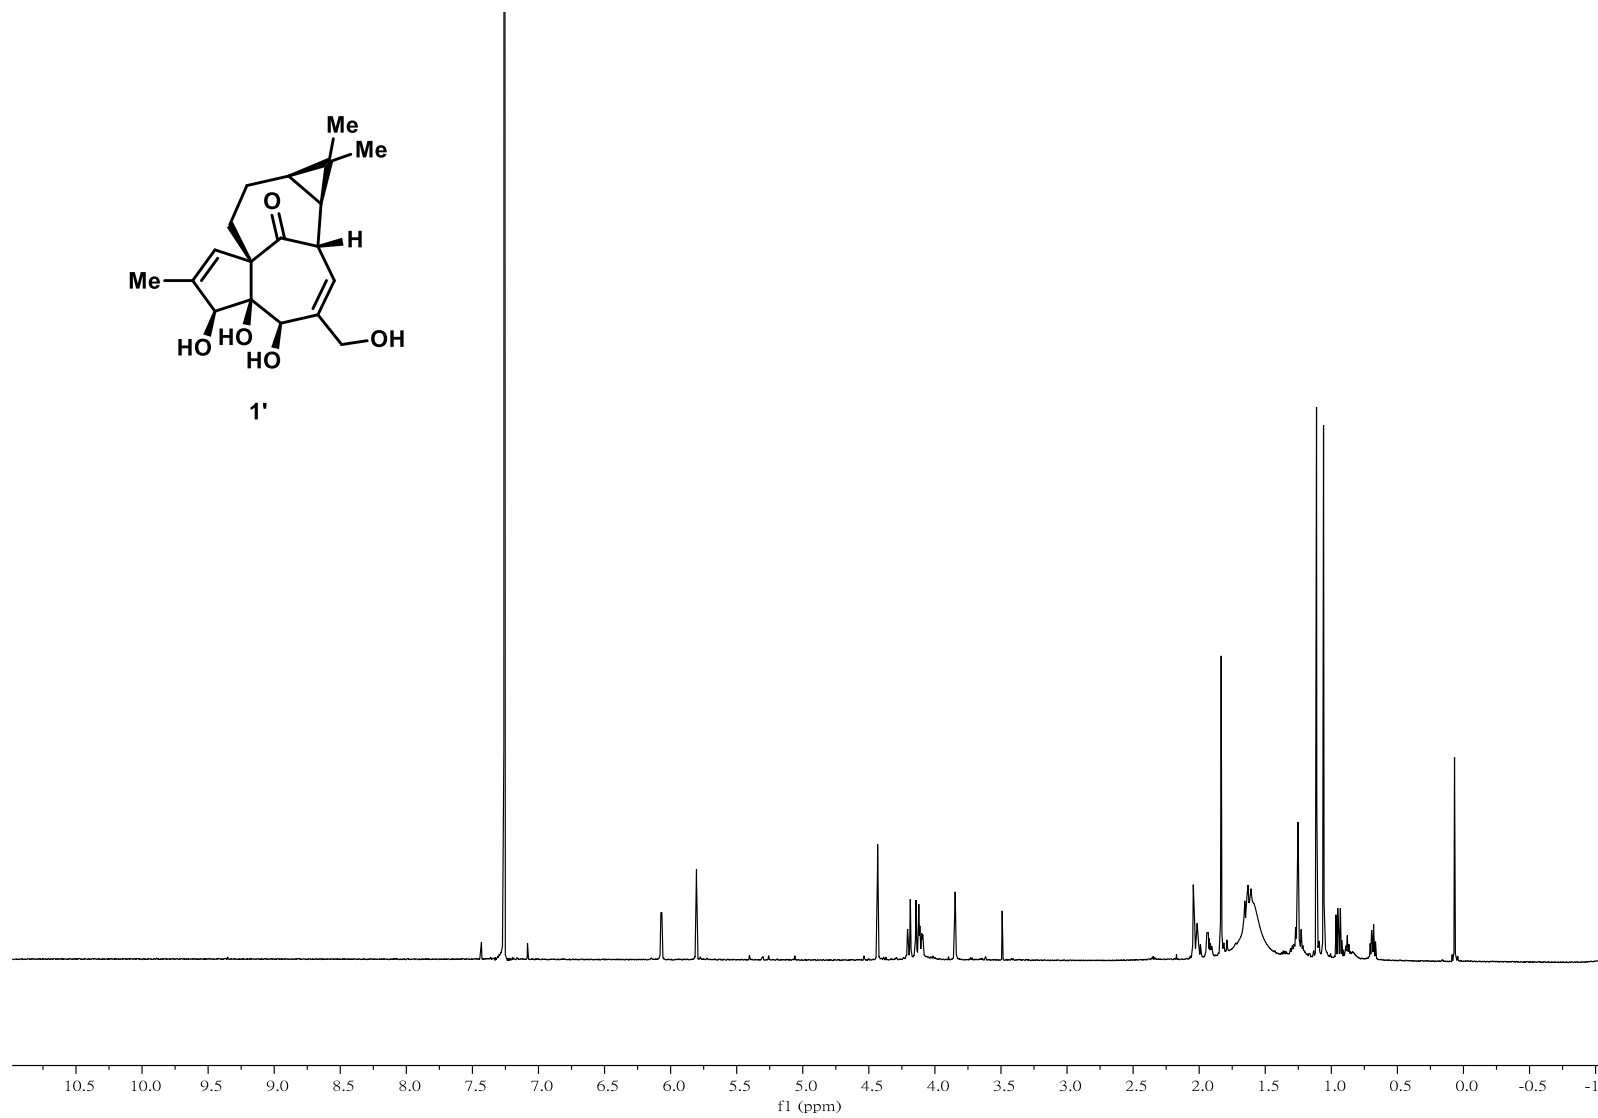

SI-170

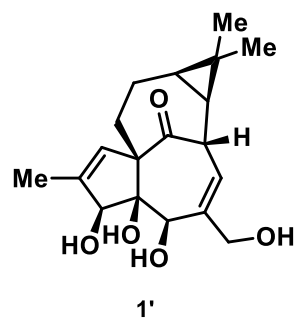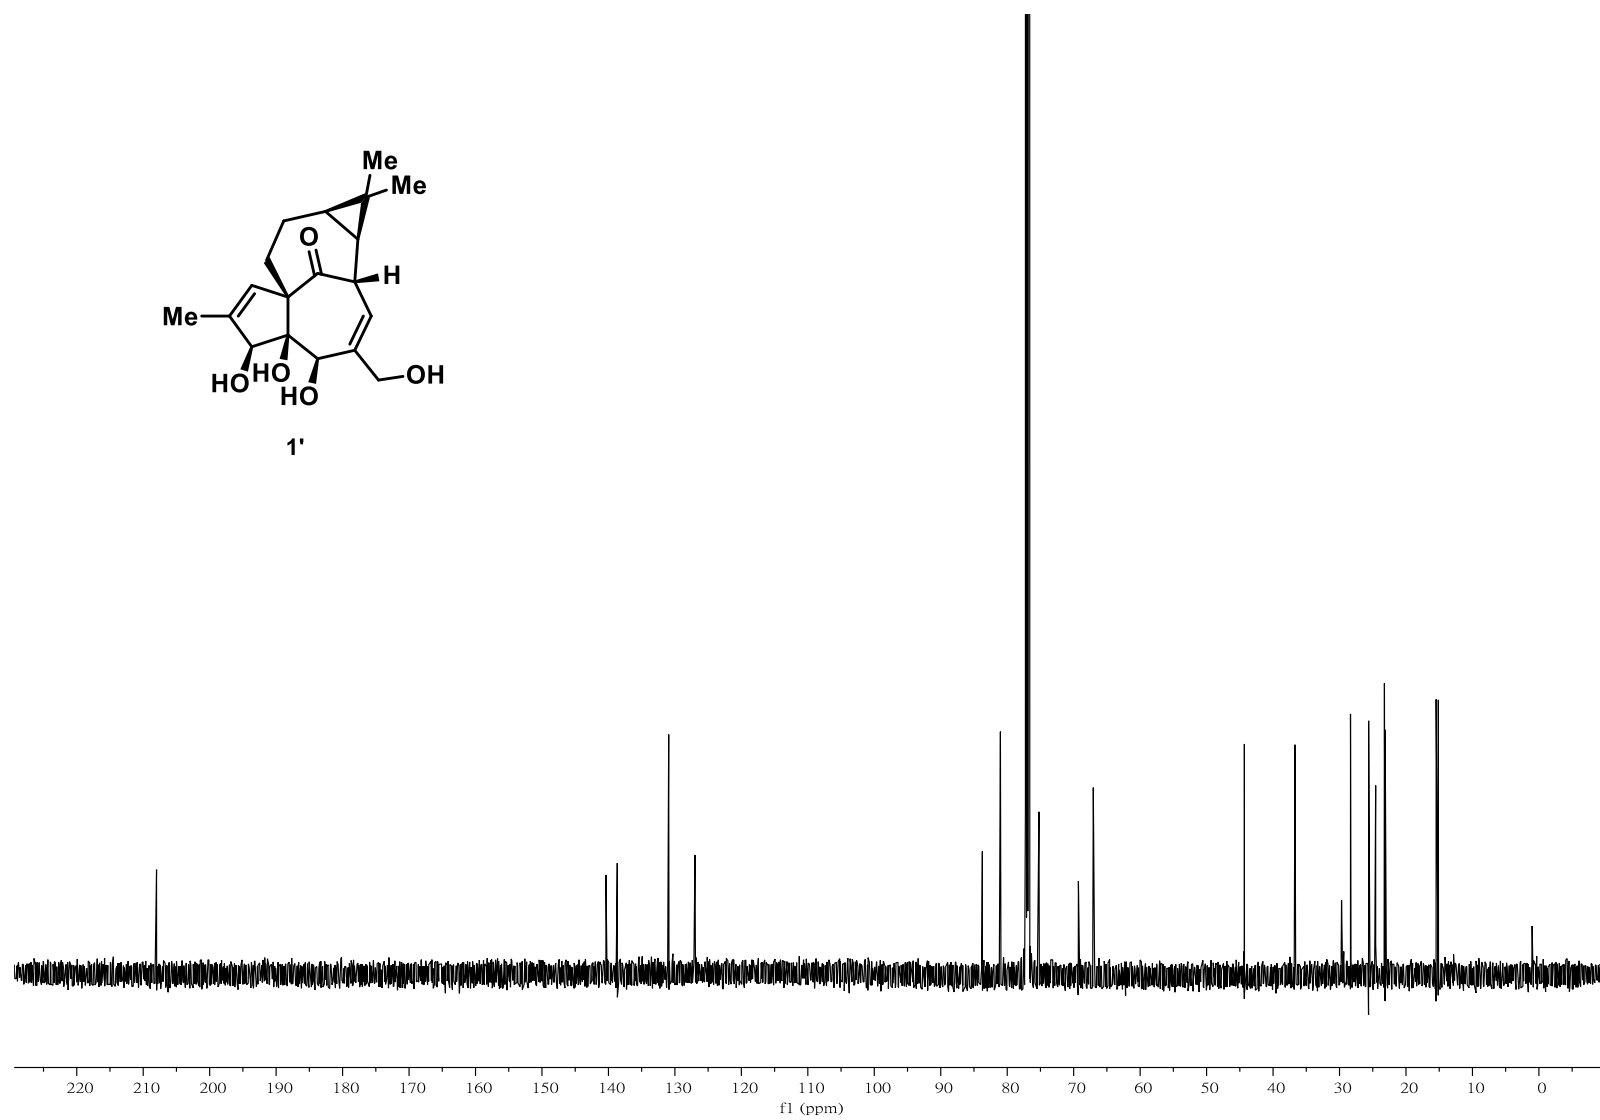

SI-171

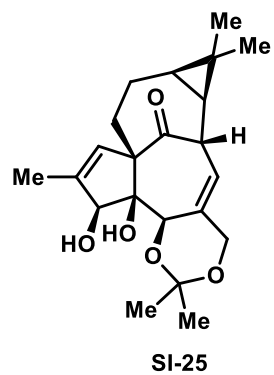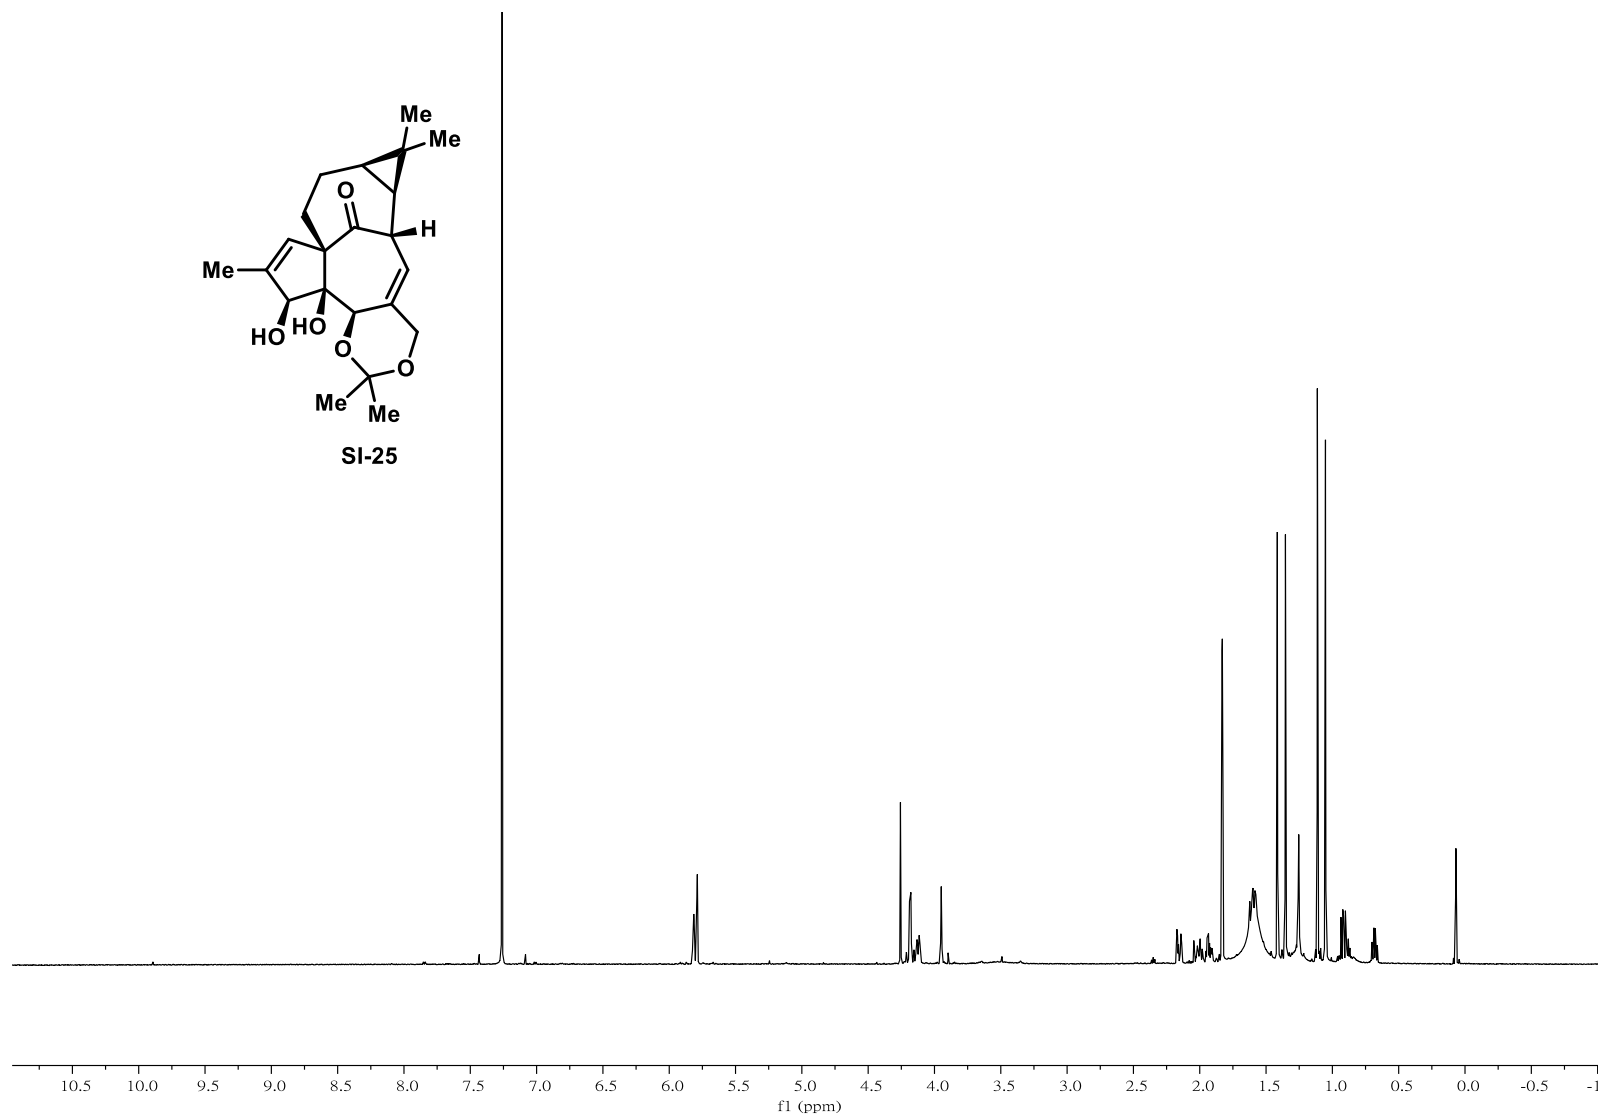

SI-172

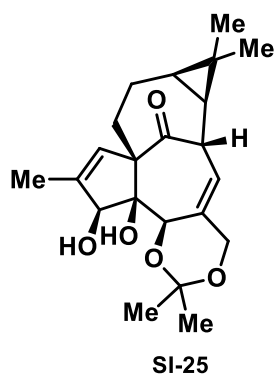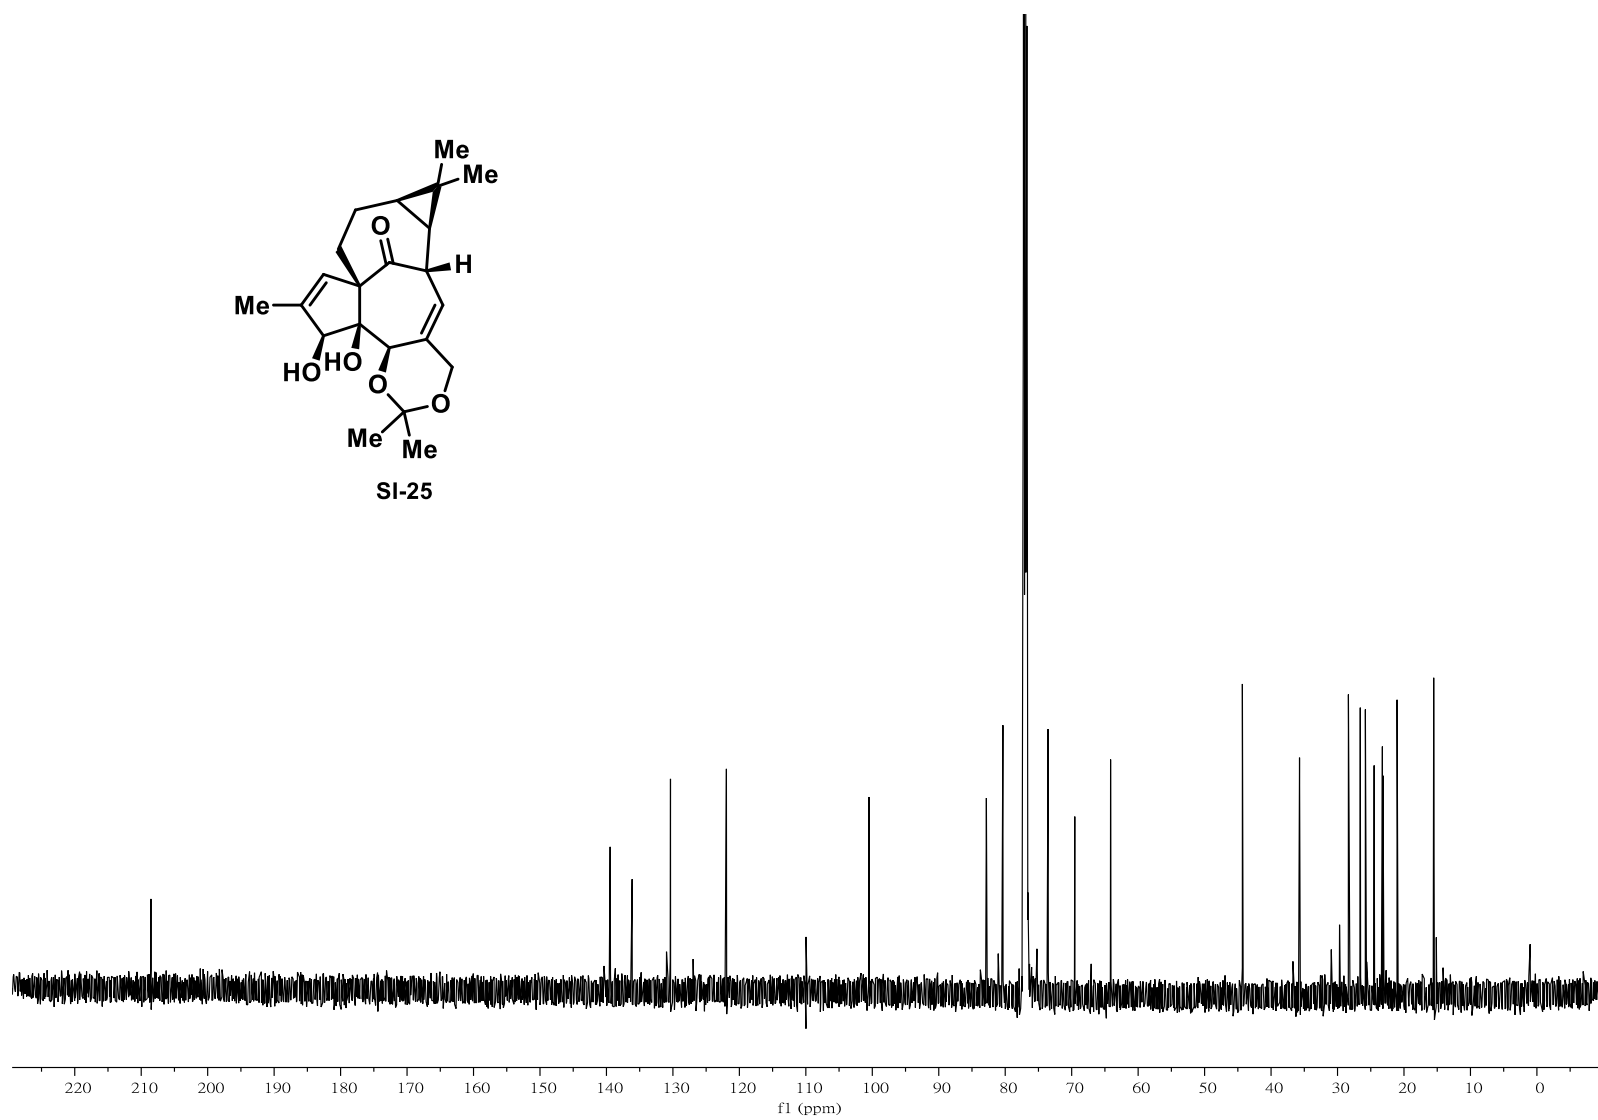

SI-173

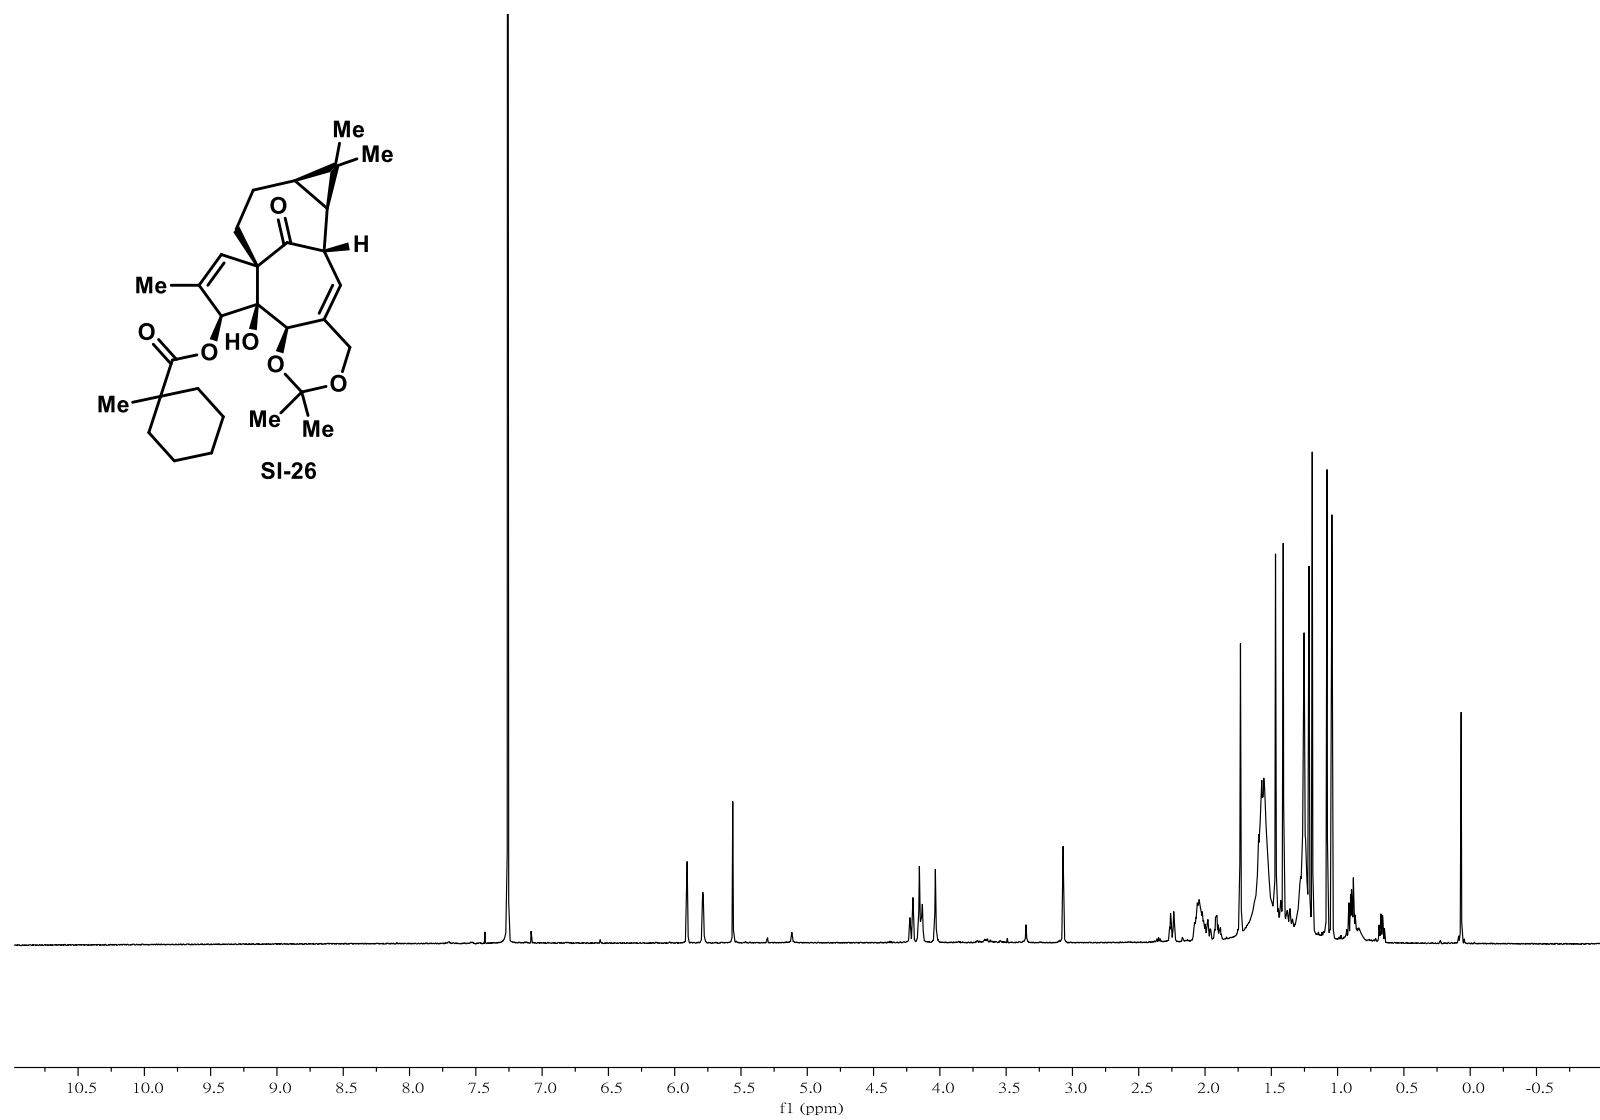

SI-174

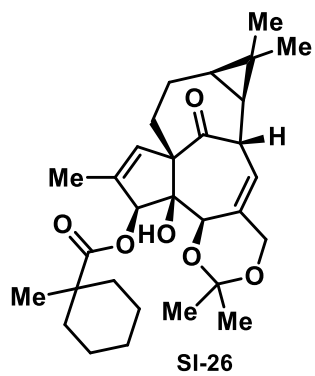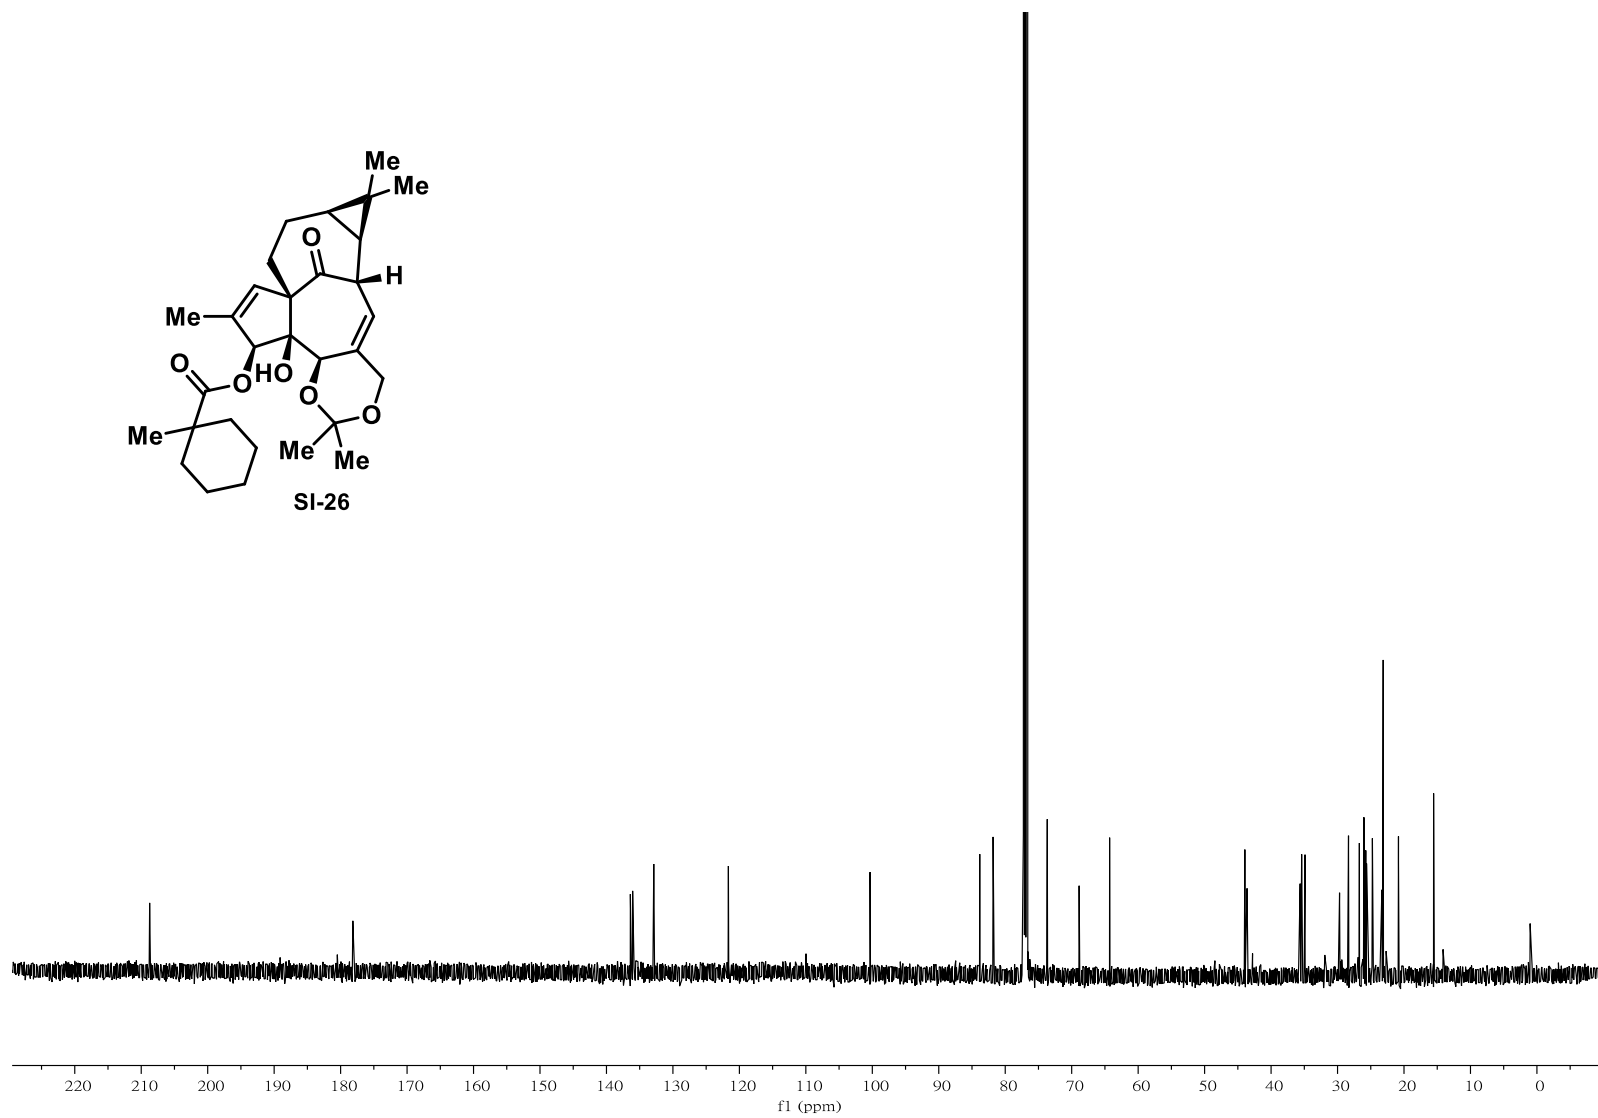

SI-175

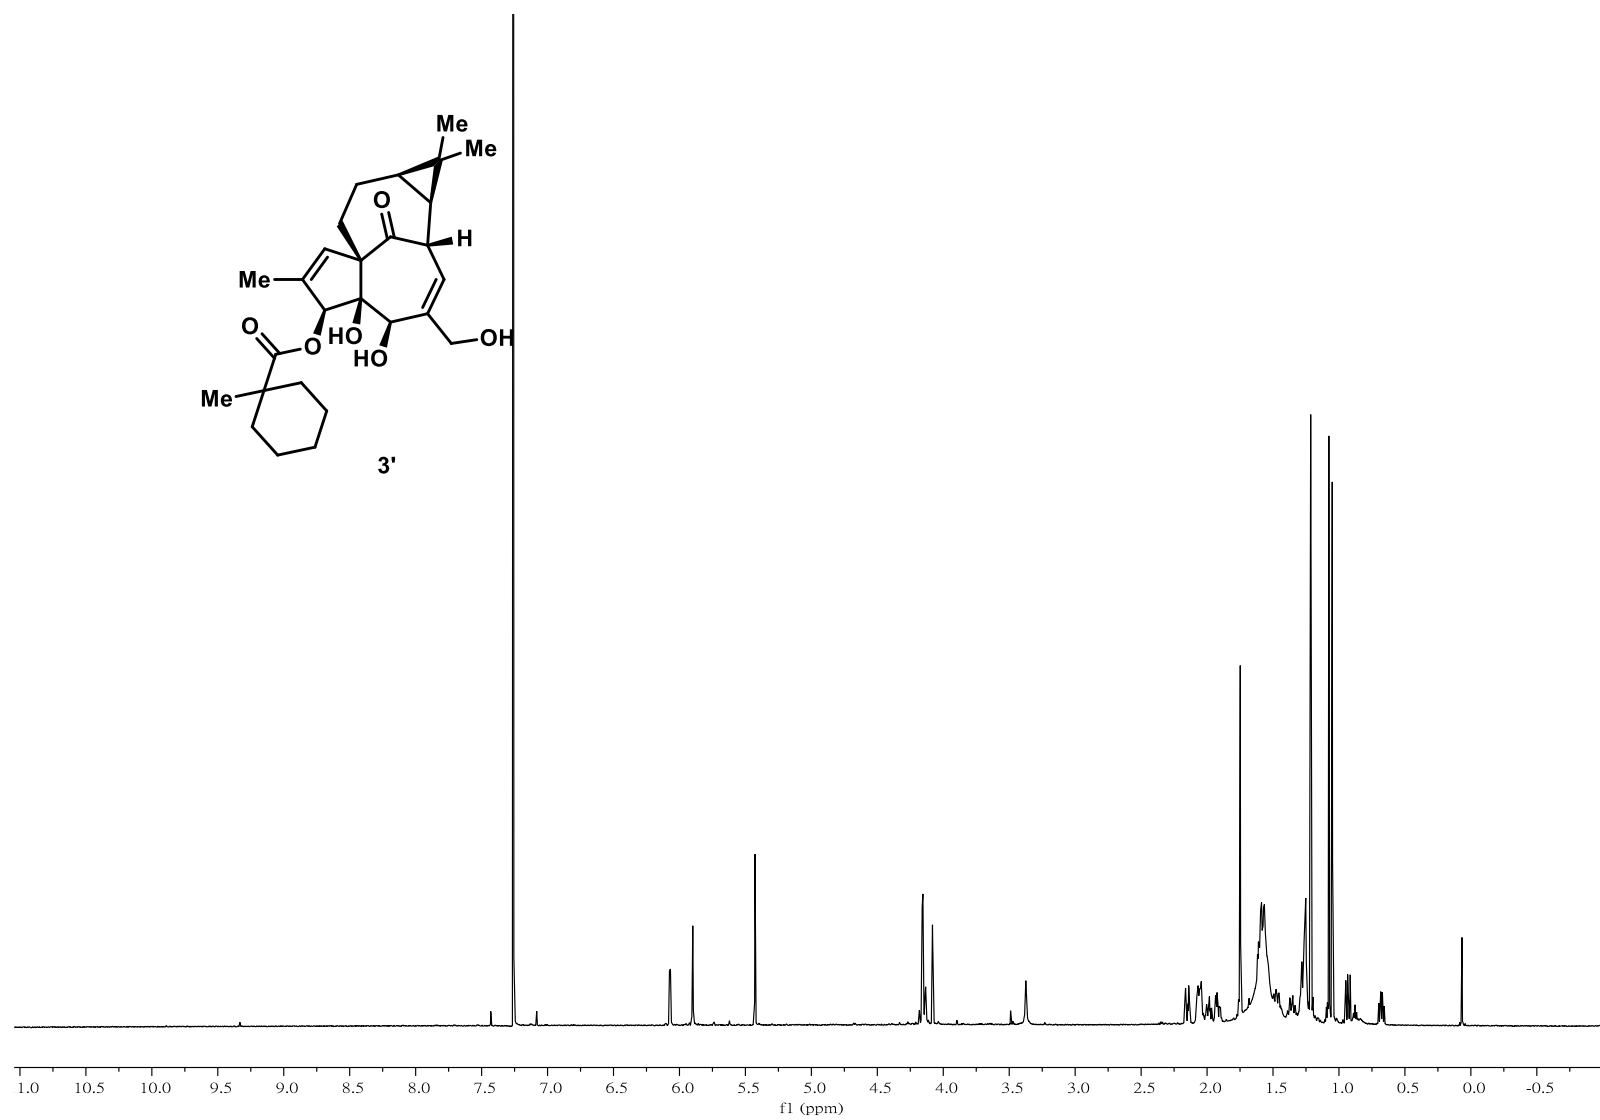

SI-176

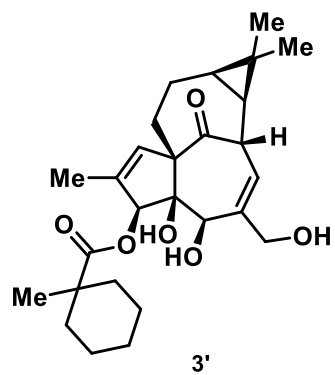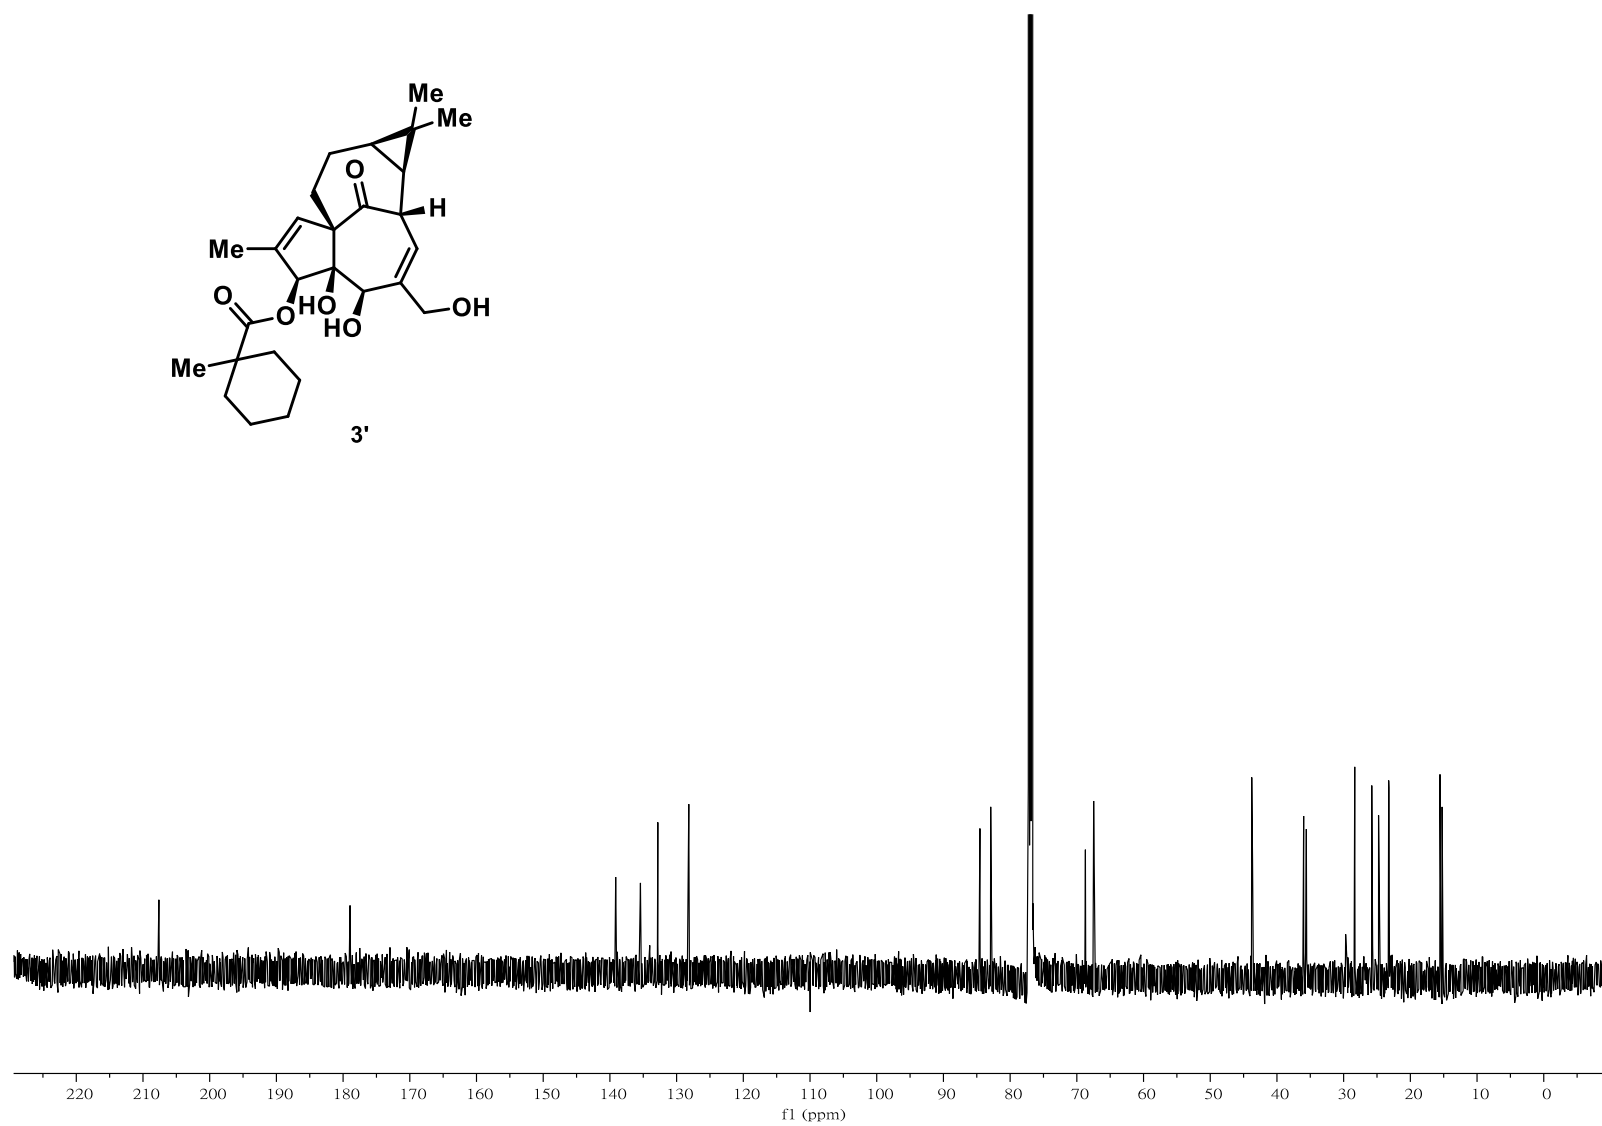

SI-177

HSQC

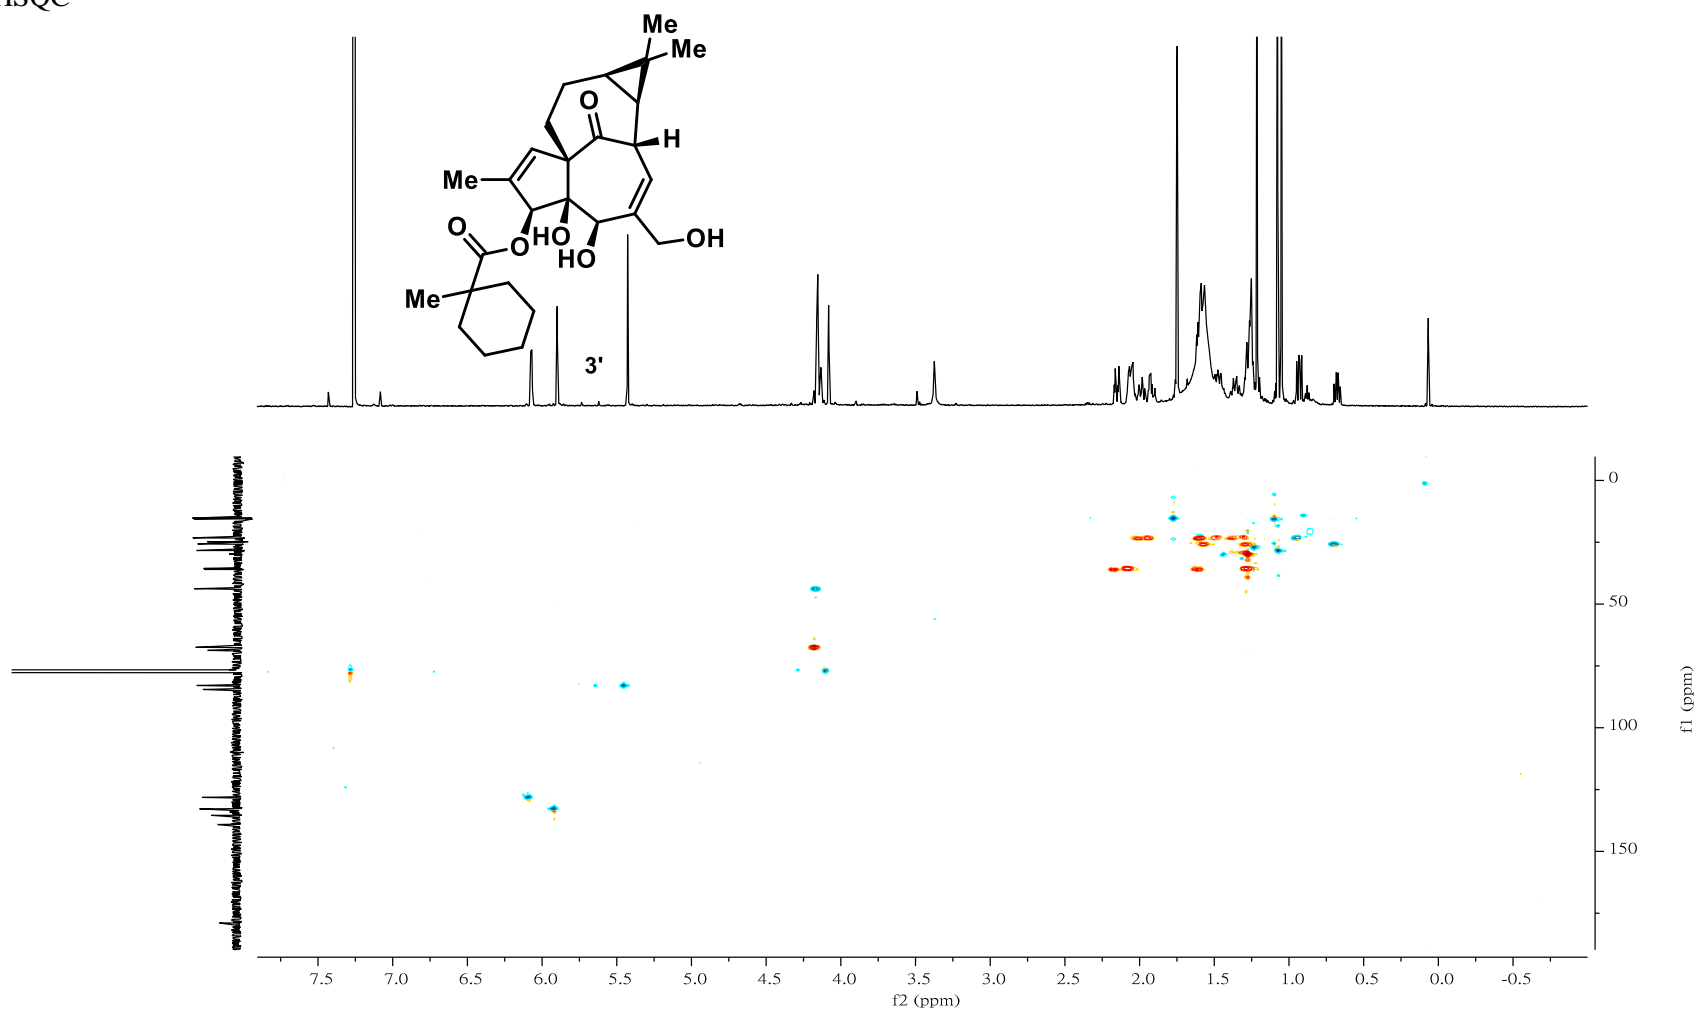

SI-178
